# Supplementary material
Source: MDPI journal article supplement (https://www.mdpi.com/2073-4344/10/1/29)
Supplement: s1 [file s1]

Archive with 3 entries (3 files):
- supporting information revised/CheckCIF-combined.pdf
- supporting information revised/CIF-combined.cif
- supporting information revised/supporting information.pdf
