# Supplementary material
Source: MDPI journal article supplement (https://www.mdpi.com/2073-4344/10/1/29)
Supplement: s1 [file s1]

# A Four Coordinated Iron(II)-digermeryl Complex as an Effective Precursor for the Catalytic Dehydrogenation of Ammonia Borane

Yoshinao Kobayashi and Yusuke Sunada

## Contents

- |                                                                                                                                              |        |
|----------------------------------------------------------------------------------------------------------------------------------------------|--------|
| 1. Detailed results obtained by the dehydrogenation of ammonia borane catalyzed by <b>1</b> in the presence of various ligands and additives | p. S-2 |
| 2. $^1\text{H}$ and $^{11}\text{B}$ NMR spectra of the products                                                                              | p. S-3 |
| 3. X-ray diffraction analysis                                                                                                                | p. S-5 |

**Table S1.** Dehydrogenation of ammonia borane catalyzed by **1** in the presence of <sup>t</sup>BuOH as an additive. <sup>[a]</sup>

| entry            | additive          | ligand                                                       | Time (h) | Conv. (%) <sup>[b]</sup> |
|------------------|-------------------|--------------------------------------------------------------|----------|--------------------------|
| 1                | <sup>t</sup> BuOH | none                                                         | 24       | ~ 0                      |
| 2                |                   | phenanthroline                                               | 24       | 50                       |
| 3 <sup>[c]</sup> |                   | phenanthroline                                               | 24       | 37                       |
| 4                |                   | phenanthroline                                               | 72       | 70                       |
| 5                |                   | bathophenanthroline                                          | 24       | 9                        |
| 6                |                   | diimine <sup>[d]</sup>                                       | 24       | 24                       |
| 7                |                   | <sup>i</sup> Pr <sub>2</sub> IM <sup>Me</sup> <sup>[e]</sup> | 24       | 32                       |
| 8                |                   | TMEDA                                                        | 24       | ~ 0                      |
| 9                |                   | pyridine                                                     | 24       | 5                        |

[a] All reactions were carried out with ammonia borane (0.5 mmol), catalytic amount of **1** (5 mol%), <sup>t</sup>BuOH (5 mol%), and ligand (5 mol%) at 55 °C in THF (5 mL). [b] Conversion of ammonia borane was determined by <sup>11</sup>B NMR. [c] reaction was performed with 10 mol% of <sup>t</sup>BuOH. [d] diimine = 2,3-bis(2,4,6-trimethylphenylimino)butane [e] <sup>i</sup>Pr<sub>2</sub>IM<sup>Me</sup> = 1,3-diisopropyl-4,5-dimethyl-imidazol-2-ylidene

**Table S2.** Dehydrogenation of ammonia borane catalyzed in the presence of various additives. <sup>[a]</sup>

| entry            | additive                       | Cat.     | ligand                                        | Time (h) | Conv. (%) <sup>[b]</sup> |
|------------------|--------------------------------|----------|-----------------------------------------------|----------|--------------------------|
| 1                | none                           | <b>1</b> | phenanthroline                                | 24       | 5                        |
| 2                | <sup>t</sup> BuOH              | <b>1</b> |                                               | 24       | 50                       |
| 3 <sup>[c]</sup> | <sup>t</sup> BuOH              | <b>2</b> |                                               | 24       | 72                       |
| 4                | <sup>t</sup> BuNH <sub>2</sub> | <b>1</b> |                                               | 24       | 76                       |
| 5                | diethylamine                   | <b>1</b> |                                               | 24       | 64                       |
| 6                | diphenylamine                  | <b>1</b> |                                               | 24       | 61                       |
| 7                | 2,4,6-trimethylaniline         | <b>1</b> |                                               | 24       | 64                       |
| 8                | 2,6-diisopropylaniline         | <b>1</b> |                                               | 24       | 30                       |
| 9                | 2-ethylhexanoic acid           | <b>1</b> |                                               | 24       | 39                       |
| 10               | none                           | <b>1</b> | none                                          | 24       | ~ 0                      |
| 11               | diphenylamine                  | <b>1</b> |                                               | 24       | ~ 0                      |
| 12               | 2,4,6-trimethylaniline         | <b>1</b> |                                               | 24       | ~ 0                      |
| 13               | 2,6-diisopropylaniline         | <b>1</b> |                                               | 24       | 11                       |
| 14               | 2-ethylhexanoic acid           | <b>1</b> |                                               | 24       | 19                       |
| 15               | diphenylamine                  | <b>1</b> | <sup>i</sup> Pr <sub>2</sub> IM <sup>Me</sup> | 24       | 19                       |
| 16               | 2,4,6-trimethylaniline         | <b>1</b> |                                               | 24       | 14                       |
| 17               | 2,6-diisopropylaniline         | <b>1</b> |                                               | 24       | 14                       |
| 18               | 2-ethylhexanoic acid           | <b>1</b> |                                               | 24       | ~ 0                      |

[a] All reactions were carried out with ammonia borane (0.5 mmol), catalytic amount of **1** (5 mol%), phenanthroline (5 mol%), and additive (5 mol%) at 55 °C in THF (5 mL) for 24h. [b] Conversion of ammonia borane was determined by <sup>11</sup>B NMR. [c] Complex **2** was used instead of **1**.

**Figure S1.**  $^1\text{H}$  NMR spectrum of solution of **1** in  $\text{C}_6\text{D}_6$  at room temperature.

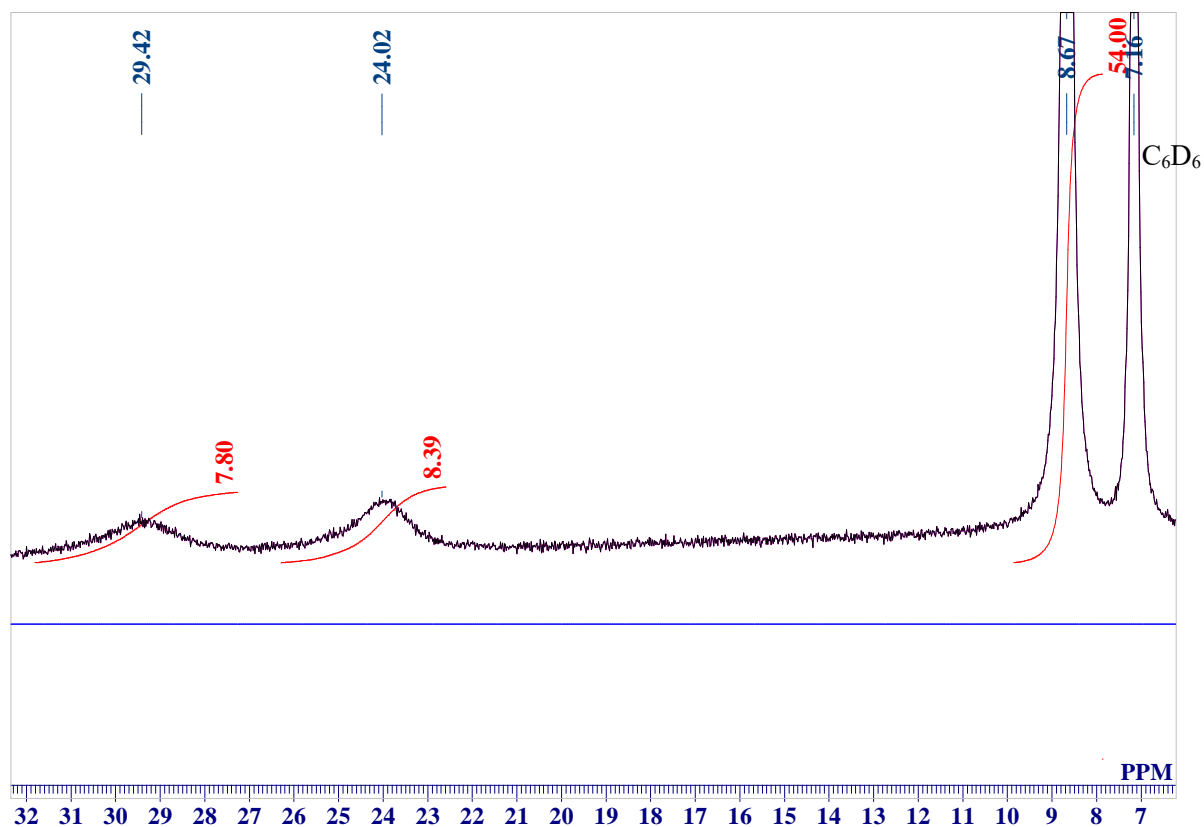

**Figure S2-1.**  $^1\text{H}$  NMR spectrum (in  $\text{THF-d}_8$  at room temperature) of the crude product obtained from the hydrogenation ammonia borane catalyzed by **1** in the presence of  $t\text{BuOH}$  and phenanthroline (Table 1 entry 2 in the main manuscript or Table S1 entry 2 in the supporting information).

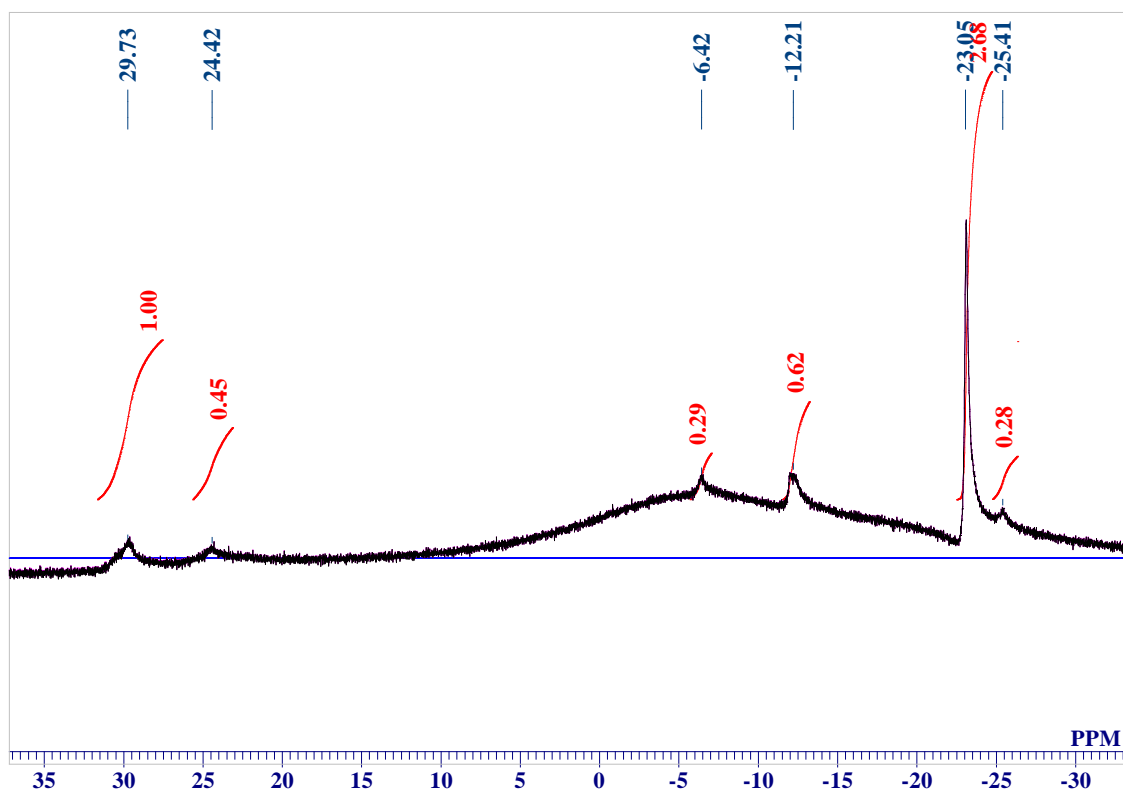

**Figure S2-2.**  $^1\text{H}$  NMR spectrum (in  $\text{THF-d}_8$  at room temperature) of the crude product obtained from the hydrogenation ammonia borane catalyzed by **1** in the presence of  $^t\text{BuNH}_2$  and phenanthroline (Table 2 entry 4 in the main manuscript or Table S2 entry 4 in the supporting information).

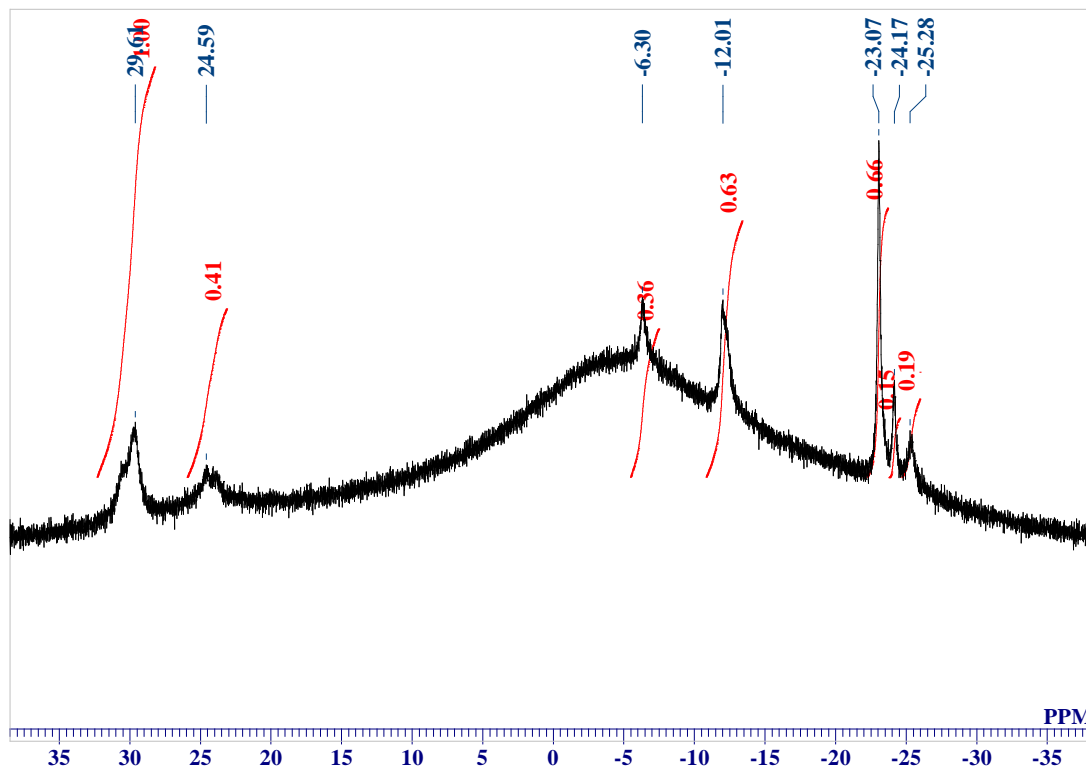

**Figure S2-3.**  $^1\text{H}$  NMR spectrum (in  $\text{THF-d}_8$  at room temperature) of the crude product obtained from the hydrogenation ammonia borane catalyzed by **1** in the presence of  $\text{Et}_2\text{NH}$  and phenanthroline (Table 2 entry 5 in the main manuscript or Table S2 entry 5 in the supporting information).

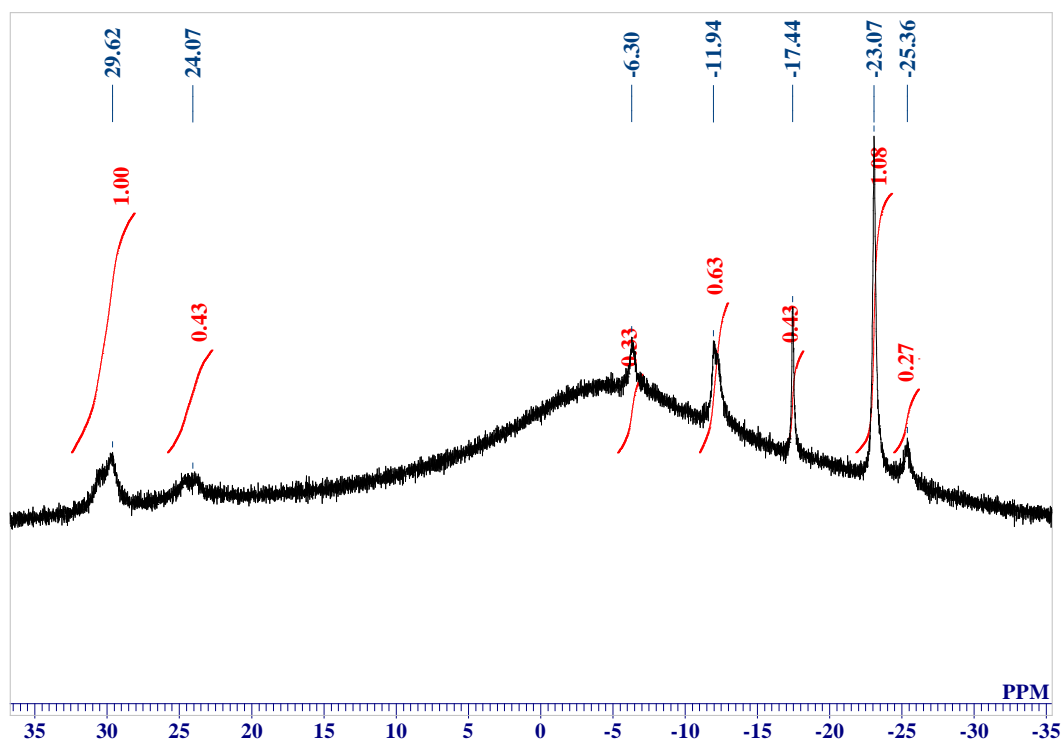

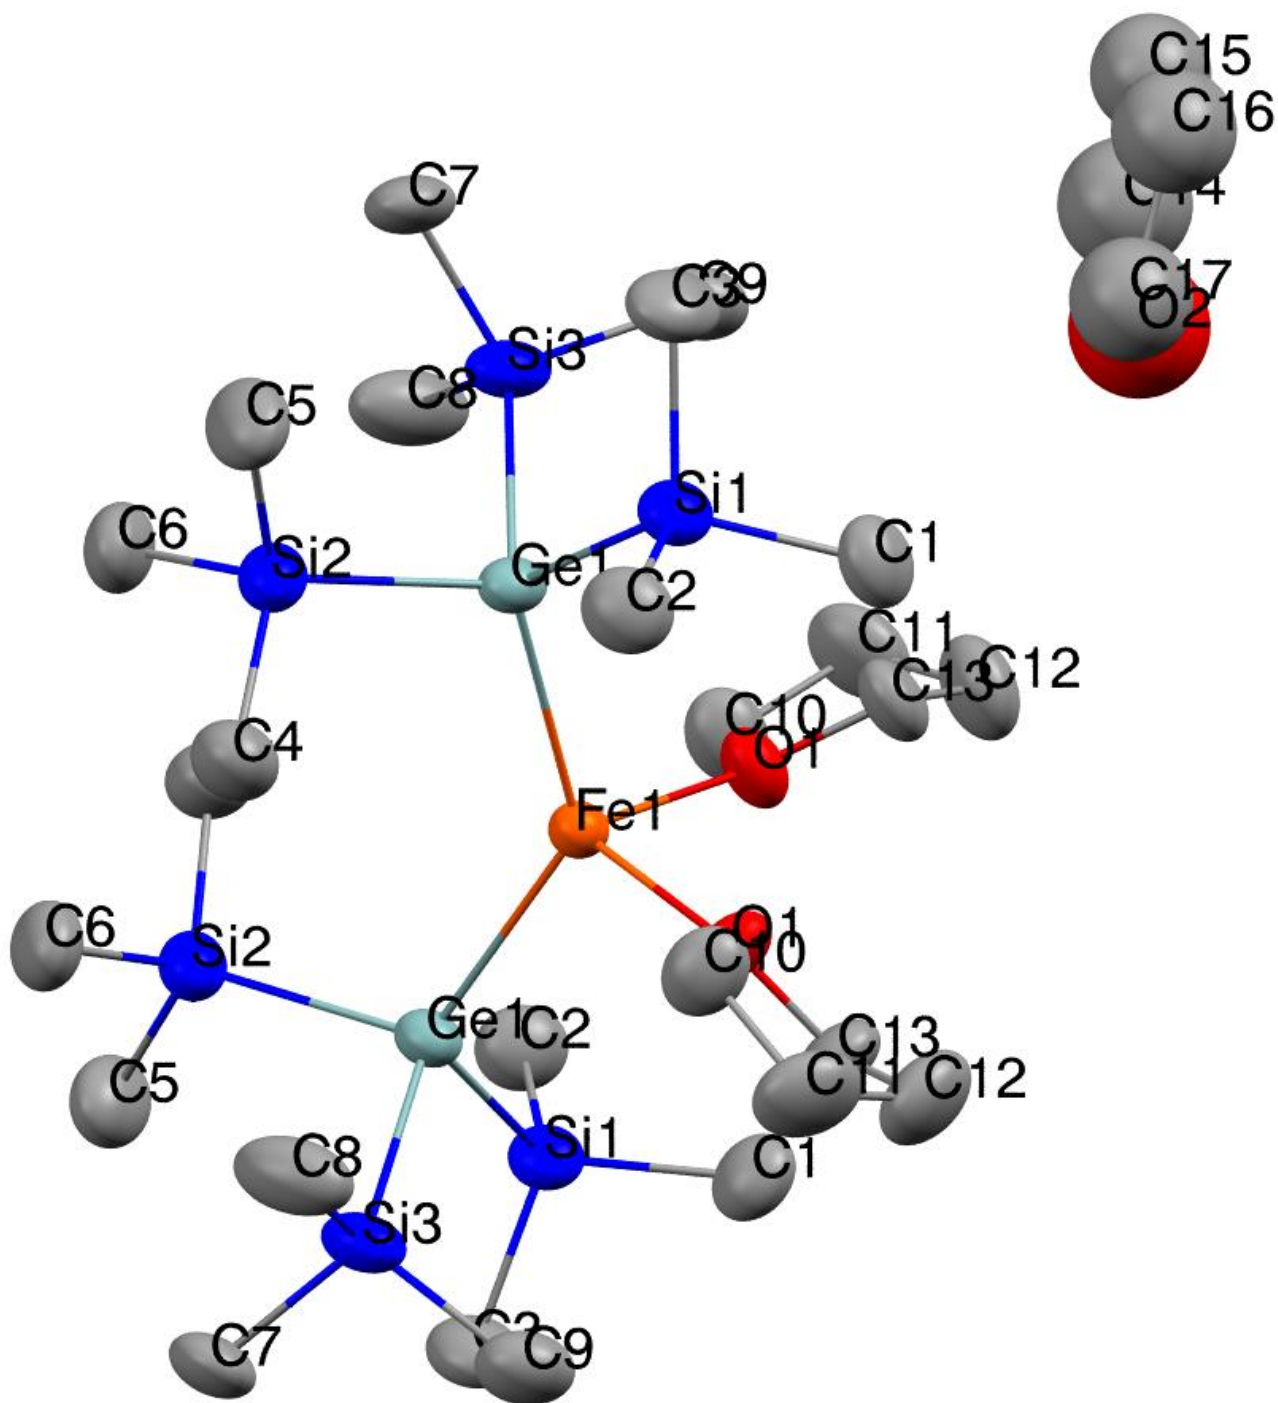

**Figure S3.** ORTEP drawing of **1** (50% probability of the thermal ellipsoids)

**Table S3-1.** Crystal data and structure refinement for **1**.

|                                      |                                                                                                            |
|--------------------------------------|------------------------------------------------------------------------------------------------------------|
| Empirical Formula                    | C <sub>34</sub> H <sub>70</sub> FeGe <sub>2</sub> O <sub>4</sub> Si <sub>6</sub>                           |
| Formula Weight                       | 912.46                                                                                                     |
| Crystal Color, Habit                 | red, block                                                                                                 |
| Crystal Dimensions                   | 0.150 X 0.120 X 0.120 mm                                                                                   |
| Crystal System                       | monoclinic                                                                                                 |
| Lattice Type                         | Primitive                                                                                                  |
| Lattice Parameters                   | a = 13.851(4) Å<br>b = 10.450(3) Å<br>c = 19.003(6) Å<br>β = 110.932(4) °<br>V = 2569.1(13) Å <sup>3</sup> |
| Space Group                          | P2/c (#13)                                                                                                 |
| Z value                              | 2                                                                                                          |
| D <sub>calc</sub>                    | 1.179 g/cm <sup>3</sup>                                                                                    |
| F <sub>000</sub>                     | 960.00                                                                                                     |
| μ(MoKα)                              | 16.084 cm <sup>-1</sup>                                                                                    |
| Diffractometer                       | Saturn724                                                                                                  |
| Radiation                            | MoKα (λ = 0.71075 Å)<br>multi-layer mirror monochromated                                                   |
| Voltage, Current                     | 50kV, 24mA                                                                                                 |
| Temperature                          | -89.8°C                                                                                                    |
| Detector Aperture                    | 72.8 x 72.8 mm                                                                                             |
| Data Images                          | 720 exposures                                                                                              |
| ω oscillation Range (χ=45.0, φ=0.0)  | -70.0 - 110.0°                                                                                             |
| Exposure Rate                        | 48.0 sec./°                                                                                                |
| Detector Swing Angle                 | 19.95°                                                                                                     |
| ω oscillation Range (χ=45.0, φ=90.0) | -70.0 - 110.0°                                                                                             |
| Exposure Rate                        | 48.0 sec./°                                                                                                |
| Detector Swing Angle                 | 19.95°                                                                                                     |
| Detector Position                    | 44.78 mm                                                                                                   |
| Pixel Size                           | 0.141 mm                                                                                                   |
| 2θ <sub>max</sub>                    | 55.0°                                                                                                      |
| No. of Reflections Measured          | Total: 20941<br>Unique: 5750 (R <sub>int</sub> = 0.1206)                                                   |
| Corrections                          | Lorentz-polarization<br>Absorption<br>(trans. factors: 0.694 - 0.824)                                      |

|                                       |                                                                                                                      |
|---------------------------------------|----------------------------------------------------------------------------------------------------------------------|
| Structure Solution                    | Direct Methods (SHELXT Version 2014/5)                                                                               |
| Refinement                            | Full-matrix least-squares on $F^2$                                                                                   |
| Function Minimized                    | $\Sigma w (F_o^2 - F_c^2)^2$                                                                                         |
| Least Squares Weights                 | $w = 1 / [ \sigma^2(F_o^2) + (0.0971 \cdot P)^2 + 0.0000 \cdot P ]$<br>where $P = (\text{Max}(F_o^2, 0) + 2F_c^2)/3$ |
| $2\theta_{\text{max}}$ cutoff         | 55.0°                                                                                                                |
| Anomalous Dispersion                  | All non-hydrogen atoms                                                                                               |
| No. Observations (All reflections)    | 5750                                                                                                                 |
| No. Variables                         | 188                                                                                                                  |
| Reflection/Parameter Ratio            | 30.59                                                                                                                |
| Residuals: R1 ( $I > 2.00\sigma(I)$ ) | 0.0604                                                                                                               |
| Residuals: R (All reflections)        | 0.0838                                                                                                               |
| Residuals: wR2 (All reflections)      | 0.1814                                                                                                               |
| Goodness of Fit Indicator             | 1.055                                                                                                                |
| Max Shift/Error in Final Cycle        | 0.000                                                                                                                |
| Maximum peak in Final Diff. Map       | 0.81 e <sup>-</sup> /Å <sup>3</sup>                                                                                  |
| Minimum peak in Final Diff. Map       | -1.02 e <sup>-</sup> /Å <sup>3</sup>                                                                                 |

Table S3-2. Atomic coordinates and B<sub>iso</sub>/B<sub>eq</sub> and occupancy

| atom | x           | y           | z           | B <sub>eq</sub> | occ |
|------|-------------|-------------|-------------|-----------------|-----|
| Ge1  | 0.31867(3)  | 0.47638(4)  | 0.71739(2)  | 2.746(13)       | 1   |
| Fe1  | 0.50000     | 0.38223(7)  | 0.75000     | 2.393(16)       | 1/2 |
| Si1  | 0.18075(9)  | 0.35443(13) | 0.63096(7)  | 3.22(2)         | 1   |
| Si2  | 0.29267(10) | 0.68294(13) | 0.66052(8)  | 3.72(3)         | 1   |
| Si3  | 0.26420(10) | 0.50633(14) | 0.82240(7)  | 3.62(3)         | 1   |
| O1   | 0.4947(2)   | 0.2385(3)   | 0.67141(15) | 3.36(6)         | 1   |
| O2   | 0.7655(8)   | -0.0249(8)  | 0.5965(5)   | 13.6(2)         | 1   |
| C1   | 0.2037(4)   | 0.1769(5)   | 0.6466(3)   | 4.51(10)        | 1   |
| C2   | 0.1659(4)   | 0.3859(6)   | 0.5298(2)   | 4.63(11)        | 1   |
| C3   | 0.0495(4)   | 0.3867(6)   | 0.6369(3)   | 4.94(11)        | 1   |
| C4   | 0.3588(5)   | 0.6919(6)   | 0.5901(3)   | 5.48(12)        | 1   |
| C5   | 0.1524(5)   | 0.7296(6)   | 0.6105(3)   | 5.78(13)        | 1   |
| C6   | 0.3490(5)   | 0.8130(6)   | 0.7313(3)   | 5.54(12)        | 1   |
| C7   | 0.1496(4)   | 0.6147(6)   | 0.8022(3)   | 4.78(11)        | 1   |
| C8   | 0.3691(4)   | 0.5799(7)   | 0.9044(3)   | 6.26(16)        | 1   |
| C9   | 0.2273(4)   | 0.3536(6)   | 0.8559(3)   | 5.16(12)        | 1   |
| C10  | 0.4460(4)   | 0.2630(5)   | 0.5906(2)   | 4.37(10)        | 1   |
| C11  | 0.4841(5)   | 0.1610(7)   | 0.5526(3)   | 5.81(14)        | 1   |
| C12  | 0.5227(5)   | 0.0574(6)   | 0.6115(3)   | 5.71(13)        | 1   |
| C13  | 0.5641(4)   | 0.1321(5)   | 0.6826(3)   | 4.11(9)         | 1   |
| C14  | 0.7928(11)  | 0.0019(12)  | 0.5338(7)   | 12.3(4)         | 1   |
| C15  | 0.9064(9)   | 0.0013(10)  | 0.5634(6)   | 9.9(3)          | 1   |
| C16  | 0.9427(9)   | -0.0219(10) | 0.6486(6)   | 10.7(3)         | 1   |
| C17  | 0.8414(10)  | -0.0100(10) | 0.6661(7)   | 10.4(3)         | 1   |

$B_{eq} = 8/3 \pi^2 (U_{11}(aa^*)^2 + U_{22}(bb^*)^2 + U_{33}(cc^*)^2 + 2U_{12}(aa^*bb^*)\cos \gamma + 2U_{13}(aa^*cc^*)\cos \beta + 2U_{23}(bb^*cc^*)\cos \alpha) +$

Table S3-3. Anisotropic displacement parameters

| atom | U <sub>11</sub> | U <sub>22</sub> | U <sub>33</sub> | U <sub>12</sub> | U <sub>13</sub> | U <sub>23</sub> |
|------|-----------------|-----------------|-----------------|-----------------|-----------------|-----------------|
| Ge1  | 0.0260(2)       | 0.0410(3)       | 0.0371(3)       | -0.00032(16)    | 0.01105(18)     | -0.00454(17)    |
| Fe1  | 0.0292(4)       | 0.0319(4)       | 0.0305(4)       | 0.00000         | 0.0115(3)       | 0.00000         |
| Si1  | 0.0296(6)       | 0.0497(7)       | 0.0394(7)       | -0.0038(5)      | 0.0080(5)       | -0.0043(5)      |
| Si2  | 0.0394(6)       | 0.0406(7)       | 0.0621(8)       | 0.0018(5)       | 0.0188(6)       | 0.0006(6)       |
| Si3  | 0.0324(6)       | 0.0640(9)       | 0.0442(7)       | -0.0031(5)      | 0.0176(5)       | -0.0123(6)      |
| O1   | 0.0498(17)      | 0.0446(18)      | 0.0305(14)      | 0.0139(14)      | 0.0112(13)      | -0.0035(12)     |
| C1   | 0.060(3)        | 0.054(3)        | 0.049(3)        | -0.018(2)       | 0.010(2)        | -0.007(2)       |
| C2   | 0.054(3)        | 0.075(4)        | 0.039(3)        | 0.001(3)        | 0.007(2)        | 0.007(2)        |
| C3   | 0.033(2)        | 0.080(4)        | 0.070(3)        | -0.008(2)       | 0.014(2)        | -0.013(3)       |
| C4   | 0.070(4)        | 0.069(4)        | 0.080(4)        | -0.003(3)       | 0.040(3)        | 0.004(3)        |
| C5   | 0.060(3)        | 0.059(4)        | 0.095(4)        | 0.015(3)        | 0.021(3)        | 0.021(3)        |
| C6   | 0.073(4)        | 0.044(3)        | 0.097(4)        | -0.008(3)       | 0.034(3)        | -0.012(3)       |
| C7   | 0.049(3)        | 0.069(4)        | 0.076(3)        | 0.004(3)        | 0.038(3)        | -0.013(3)       |
| C8   | 0.053(3)        | 0.126(6)        | 0.062(3)        | -0.016(4)       | 0.024(3)        | -0.039(4)       |
| C9   | 0.059(3)        | 0.087(5)        | 0.058(3)        | 0.001(3)        | 0.030(3)        | 0.003(3)        |

|     |          |          |          |          |          |           |
|-----|----------|----------|----------|----------|----------|-----------|
| C10 | 0.068(3) | 0.063(3) | 0.028(2) | 0.011(3) | 0.008(2) | 0.002(2)  |
| C11 | 0.078(4) | 0.097(5) | 0.046(3) | 0.009(3) | 0.023(3) | -0.021(3) |
| C12 | 0.082(4) | 0.063(4) | 0.068(4) | 0.013(3) | 0.021(3) | -0.022(3) |
| C13 | 0.055(3) | 0.050(3) | 0.051(3) | 0.019(2) | 0.021(2) | -0.003(2) |

The general temperature factor expression:  $\exp(-2\pi^2(a^2U_{11}h^2 + b^2U_{22}k^2 + c^2U_{33}l^2 + 2a*b*U_{12}hk + 2a*c*U_{13}hl + 2b*c*U_{23}kl))$

Table S3-4. Bond lengths (Å)

| atom | atom | distance   | atom | atom            | distance   |
|------|------|------------|------|-----------------|------------|
| Ge1  | Fe1  | 2.5589(8)  | Ge1  | Si1             | 2.3936(13) |
| Ge1  | Si2  | 2.3831(15) | Ge1  | Si3             | 2.3927(17) |
| Fe1  | O1   | 2.101(3)   | Fe1  | O1 <sup>1</sup> | 2.101(3)   |
| Si1  | C1   | 1.888(5)   | Si1  | C2              | 1.887(5)   |
| Si1  | C3   | 1.891(6)   | Si2  | C4              | 1.874(7)   |
| Si2  | C5   | 1.897(6)   | Si2  | C6              | 1.875(6)   |
| Si3  | C7   | 1.874(6)   | Si3  | C8              | 1.874(5)   |
| Si3  | C9   | 1.856(7)   | O1   | C10             | 1.463(5)   |
| O1   | C13  | 1.435(6)   | O2   | C14             | 1.401(19)  |
| O2   | C17  | 1.374(13)  | C10  | C11             | 1.486(9)   |
| C11  | C12  | 1.511(9)   | C12  | C13             | 1.487(7)   |
| C14  | C15  | 1.470(18)  | C15  | C16             | 1.533(15)  |
| C16  | C17  | 1.56(2)    |      |                 |            |

Symmetry Operators:

(1) -X+1,Y,-Z+1/2+1

Table S3-5. Bond angles (°)

| atom             | atom | atom             | angle      | atom             | atom | atom            | angle      |
|------------------|------|------------------|------------|------------------|------|-----------------|------------|
| Fe1              | Ge1  | Si1              | 115.79(4)  | Fe1              | Ge1  | Si2             | 115.74(4)  |
| Fe1              | Ge1  | Si3              | 115.02(3)  | Si1              | Ge1  | Si2             | 102.52(5)  |
| Si1              | Ge1  | Si3              | 103.29(5)  | Si2              | Ge1  | Si3             | 102.60(6)  |
| Ge1              | Fe1  | Ge1 <sup>1</sup> | 134.77(4)  | Ge1              | Fe1  | O1              | 108.70(8)  |
| Ge1              | Fe1  | O1 <sup>1</sup>  | 103.26(9)  | Ge1 <sup>1</sup> | Fe1  | O1              | 103.26(9)  |
| Ge1 <sup>1</sup> | Fe1  | O1 <sup>1</sup>  | 108.70(8)  | O1               | Fe1  | O1 <sup>1</sup> | 88.70(12)  |
| Ge1              | Si1  | C1               | 111.53(14) | Ge1              | Si1  | C2              | 112.06(18) |
| Ge1              | Si1  | C3               | 114.36(18) | C1               | Si1  | C2              | 106.4(3)   |
| C1               | Si1  | C3               | 106.1(3)   | C2               | Si1  | C3              | 105.8(2)   |
| Ge1              | Si2  | C4               | 109.6(2)   | Ge1              | Si2  | C5              | 115.0(2)   |
| Ge1              | Si2  | C6               | 112.00(19) | C4               | Si2  | C5              | 107.7(3)   |
| C4               | Si2  | C6               | 106.9(3)   | C5               | Si2  | C6              | 105.2(3)   |
| Ge1              | Si3  | C7               | 113.84(19) | Ge1              | Si3  | C8              | 111.4(2)   |
| Ge1              | Si3  | C9               | 112.4(2)   | C7               | Si3  | C8              | 105.7(3)   |
| C7               | Si3  | C9               | 105.9(3)   | C8               | Si3  | C9              | 107.1(3)   |
| Fe1              | O1   | C10              | 120.5(3)   | Fe1              | O1   | C13             | 126.7(2)   |
| C10              | O1   | C13              | 108.9(4)   | C14              | O2   | C17             | 116.8(11)  |
| O1               | C10  | C11              | 105.9(4)   | C10              | C11  | C12             | 104.3(5)   |
| C11              | C12  | C13              | 102.5(5)   | O1               | C13  | C12             | 104.6(4)   |
| O2               | C14  | C15              | 104.5(9)   | C14              | C15  | C16             | 107.9(11)  |

C15      C16      C17      103.5(9)      O2      C17      C16      102.8(11)

Symmetry Operators:

(1) -X+1,Y,-Z+1/2+1

Table S3-6. Torsion Angles(°)

(Those having bond angles > 160 or < 20 degrees are excluded.)

| atom1            | atom2 | atom3           | atom4            | angle      | atom1            | atom2 | atom3           | atom4            | angle     |
|------------------|-------|-----------------|------------------|------------|------------------|-------|-----------------|------------------|-----------|
| Fe1              | Ge1   | Si1             | C1               | 36.75(8)   | Fe1              | Ge1   | Si1             | C2               | -82.46(6) |
| Fe1              | Ge1   | Si1             | C3               | 157.15(5)  | Si1              | Ge1   | Fe1             | Ge1 <sup>1</sup> | 147.34(4) |
| Si1              | Ge1   | Fe1             | O1               | 14.74(5)   | Si1              | Ge1   | Fe1             | O1 <sup>1</sup>  | -78.42(5) |
| Fe1              | Ge1   | Si2             | C4               | 40.89(6)   | Fe1              | Ge1   | Si2             | C5               | 162.34(6) |
| Fe1              | Ge1   | Si2             | C6               | -77.65(8)  | Si2              | Ge1   | Fe1             | Ge1 <sup>1</sup> | 27.31(5)  |
| Si2              | Ge1   | Fe1             | O1               | -105.28(5) | Si2              | Ge1   | Fe1             | O1 <sup>1</sup>  | 161.56(4) |
| Fe1              | Ge1   | Si3             | C7               | 164.06(5)  | Fe1              | Ge1   | Si3             | C8               | 44.62(8)  |
| Fe1              | Ge1   | Si3             | C9               | -75.60(6)  | Si3              | Ge1   | Fe1             | Ge1 <sup>1</sup> | -92.18(4) |
| Si3              | Ge1   | Fe1             | O1               | 135.22(4)  | Si3              | Ge1   | Fe1             | O1 <sup>1</sup>  | 42.06(5)  |
| Si1              | Ge1   | Si2             | C4               | -86.11(7)  | Si1              | Ge1   | Si2             | C5               | 35.33(9)  |
| Si1              | Ge1   | Si2             | C6               | 155.34(7)  | Si2              | Ge1   | Si1             | C1               | 163.73(7) |
| Si2              | Ge1   | Si1             | C2               | 44.52(8)   | Si2              | Ge1   | Si1             | C3               | -75.88(8) |
| Si1              | Ge1   | Si3             | C7               | -68.81(8)  | Si1              | Ge1   | Si3             | C8               | 171.75(6) |
| Si1              | Ge1   | Si3             | C9               | 51.53(6)   | Si3              | Ge1   | Si1             | C1               | -89.89(7) |
| Si3              | Ge1   | Si1             | C2               | 150.90(6)  | Si3              | Ge1   | Si1             | C3               | 30.51(8)  |
| Si2              | Ge1   | Si3             | C7               | 37.51(7)   | Si2              | Ge1   | Si3             | C8               | -81.93(7) |
| Si2              | Ge1   | Si3             | C9               | 157.85(5)  | Si3              | Ge1   | Si2             | C4               | 166.98(5) |
| Si3              | Ge1   | Si2             | C5               | -71.58(8)  | Si3              | Ge1   | Si2             | C6               | 48.43(8)  |
| Ge1              | Fe1   | O1              | C10              | 49.7(2)    | Ge1              | Fe1   | O1              | C13              | -155.3(2) |
| Ge1              | Fe1   | O1 <sup>1</sup> | C10 <sup>1</sup> | -97.9(2)   | Ge1              | Fe1   | O1 <sup>1</sup> | C13 <sup>1</sup> | 57.2(3)   |
| Ge1 <sup>1</sup> | Fe1   | O1              | C10              | -97.9(2)   | Ge1 <sup>1</sup> | Fe1   | O1              | C13              | 57.2(3)   |
| Ge1 <sup>1</sup> | Fe1   | O1 <sup>1</sup> | C10 <sup>1</sup> | 49.7(2)    | Ge1 <sup>1</sup> | Fe1   | O1 <sup>1</sup> | C13 <sup>1</sup> | -155.3(2) |
| O1               | Fe1   | O1 <sup>1</sup> | C10 <sup>1</sup> | 153.2(2)   | O1               | Fe1   | O1 <sup>1</sup> | C13 <sup>1</sup> | -51.7(3)  |
| O1 <sup>1</sup>  | Fe1   | O1              | C10              | 153.2(2)   | O1 <sup>1</sup>  | Fe1   | O1              | C13              | -51.7(3)  |
| Fe1              | O1    | C10             | C11              | 162.6(2)   | Fe1              | O1    | C13             | C12              | 177.2(2)  |
| C10              | O1    | C13             | C12              | -25.4(5)   | C13              | O1    | C10             | C11              | 3.5(5)    |
| C14              | O2    | C17             | C16              | -22.7(11)  | C17              | O2    | C14             | C15              | 16.8(12)  |
| O1               | C10   | C11             | C12              | 19.3(5)    | C10              | C11   | C12             | C13              | -34.2(6)  |
| C11              | C12   | C13             | O1               | 36.5(6)    | O2               | C14   | C15             | C16              | -2.5(11)  |
| C14              | C15   | C16             | C17              | -9.7(10)   | C15              | C16   | C17             | O2               | 18.2(10)  |

Symmetry Operators:

(1) -X+1,Y,-Z+1/2+1

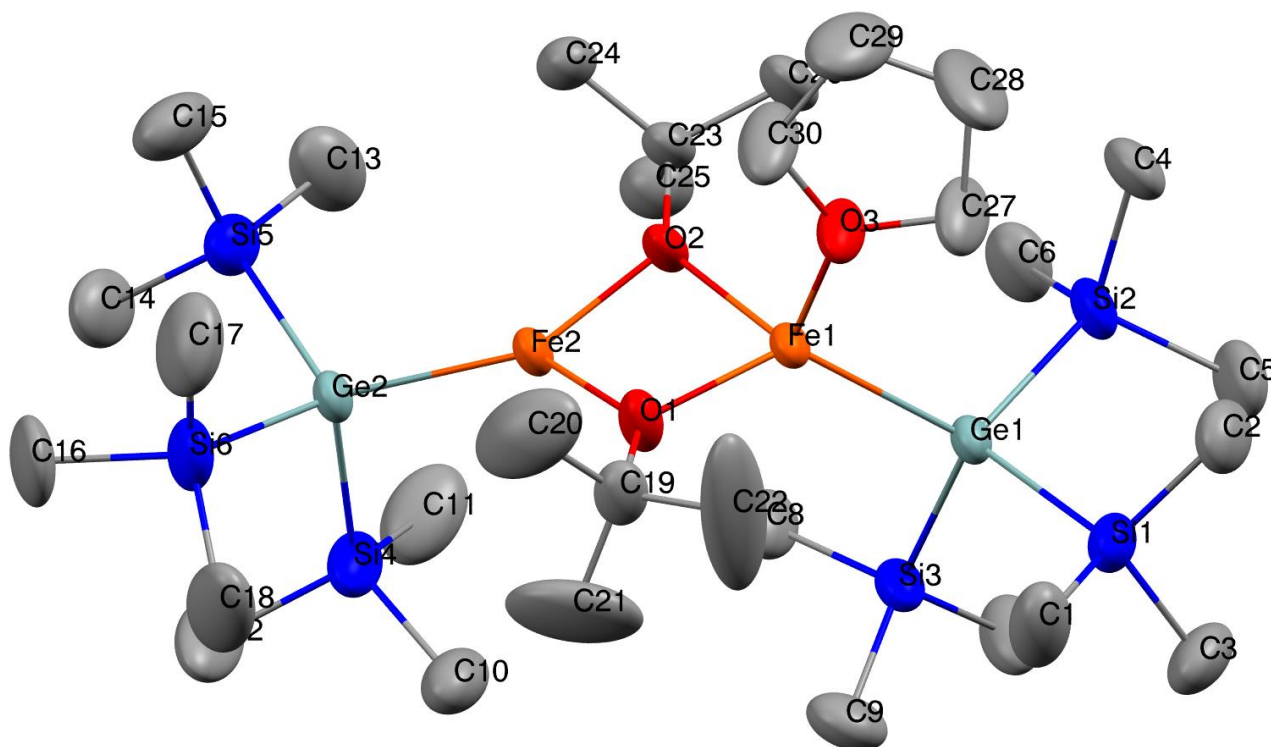

**Figure S4.** ORTEP drawing of **6** (50% probability of the thermal ellipsoids)

**Table S4-1.** Crystal data and structure refinement for **6**.

|                                                          |                                                                                                                    |
|----------------------------------------------------------|--------------------------------------------------------------------------------------------------------------------|
| Empirical Formula                                        | C <sub>30</sub> H <sub>80</sub> Fe <sub>2</sub> Ge <sub>2</sub> O <sub>3</sub> Si <sub>6</sub>                     |
| Formula Weight                                           | 914.35                                                                                                             |
| Crystal Color, Habit                                     | brown, block                                                                                                       |
| Crystal Dimensions                                       | 0.300 X 0.300 X 0.200 mm                                                                                           |
| Crystal System                                           | monoclinic                                                                                                         |
| Lattice Type                                             | Primitive                                                                                                          |
| Lattice Parameters                                       | a = 15.448(2) Å<br>b = 16.956(2) Å<br>c = 19.743(3) Å<br>$\beta$ = 102.5078(18) °<br>V = 5048.6(13) Å <sup>3</sup> |
| Space Group                                              | P2 <sub>1</sub> /c (#14)                                                                                           |
| Z value                                                  | 4                                                                                                                  |
| D <sub>calc</sub>                                        | 1.203 g/cm <sup>3</sup>                                                                                            |
| F <sub>000</sub>                                         | 1936.00                                                                                                            |
| $\mu$ (MoK $\alpha$ )                                    | 19.075 cm <sup>-1</sup>                                                                                            |
| Diffractometer                                           | Saturn724                                                                                                          |
| Radiation                                                | MoK $\alpha$ ( $\lambda$ = 0.71075 Å)<br>multi-layer mirror monochromated                                          |
| Voltage, Current                                         | 50kV, 24mA                                                                                                         |
| Temperature                                              | -74.8°C                                                                                                            |
| Detector Aperture                                        | 72.8 x 72.8 mm                                                                                                     |
| Data Images                                              | 720 exposures                                                                                                      |
| $\omega$ oscillation Range ( $\chi$ =45.0, $\phi$ =0.0)  | -70.0 - 110.0°                                                                                                     |
| Exposure Rate                                            | 10.0 sec./°                                                                                                        |
| Detector Swing Angle                                     | 19.88°                                                                                                             |
| $\omega$ oscillation Range ( $\chi$ =45.0, $\phi$ =90.0) | -70.0 - 110.0°                                                                                                     |
| Exposure Rate                                            | 10.0 sec./°                                                                                                        |
| Detector Swing Angle                                     | 19.88°                                                                                                             |
| Detector Position                                        | 44.83 mm                                                                                                           |
| Pixel Size                                               | 0.141 mm                                                                                                           |
| 2 $\theta$ <sub>max</sub>                                | 55.0°                                                                                                              |
| No. of Reflections Measured                              | Total: 40092<br>Unique: 11471 (R <sub>int</sub> = 0.1003)                                                          |
| Corrections                                              | Lorentz-polarization<br>Absorption<br>(trans. factors: 0.399 - 0.683)                                              |
| Structure Solution                                       | Direct Methods (SHELXT Version 2014/5)                                                                             |

|                                       |                                                                                                                      |
|---------------------------------------|----------------------------------------------------------------------------------------------------------------------|
| Refinement                            | Full-matrix least-squares on $F^2$                                                                                   |
| Function Minimized                    | $\Sigma w (F_o^2 - F_c^2)^2$                                                                                         |
| Least Squares Weights                 | $w = 1 / [ \sigma^2(F_o^2) + (0.0717 \cdot P)^2 + 1.6288 \cdot P ]$<br>where $P = (\text{Max}(F_o^2, 0) + 2F_c^2)/3$ |
| $2\theta_{\text{max}}$ cutoff         | 55.0°                                                                                                                |
| Anomalous Dispersion                  | All non-hydrogen atoms                                                                                               |
| No. Observations (All reflections)    | 11471                                                                                                                |
| No. Variables                         | 388                                                                                                                  |
| Reflection/Parameter Ratio            | 29.56                                                                                                                |
| Residuals: R1 ( $I > 2.00\sigma(I)$ ) | 0.0483                                                                                                               |
| Residuals: R (All reflections)        | 0.0535                                                                                                               |
| Residuals: wR2 (All reflections)      | 0.1311                                                                                                               |
| Goodness of Fit Indicator             | 1.047                                                                                                                |
| Max Shift/Error in Final Cycle        | 0.002                                                                                                                |
| Maximum peak in Final Diff. Map       | 1.37 e <sup>-</sup> /Å <sup>3</sup>                                                                                  |
| Minimum peak in Final Diff. Map       | -1.23 e <sup>-</sup> /Å <sup>3</sup>                                                                                 |

Table S4-2. Atomic coordinates and B<sub>iso</sub>/B<sub>eq</sub>

| atom | x           | y           | z           | B <sub>eq</sub> |
|------|-------------|-------------|-------------|-----------------|
| Ge1  | 0.88697(2)  | 0.66999(2)  | 0.68285(2)  | 2.387(6)        |
| Ge2  | 0.42575(2)  | 0.76161(2)  | 0.56987(2)  | 2.631(7)        |
| Fe1  | 0.78005(2)  | 0.77415(2)  | 0.62523(2)  | 2.181(7)        |
| Fe2  | 0.58729(2)  | 0.78758(2)  | 0.58687(2)  | 2.345(7)        |
| Si1  | 1.00431(5)  | 0.70639(5)  | 0.77827(4)  | 3.459(14)       |
| Si2  | 0.96150(5)  | 0.59841(5)  | 0.60805(4)  | 3.395(14)       |
| Si3  | 0.80205(5)  | 0.57363(4)  | 0.72736(4)  | 3.093(13)       |
| Si4  | 0.40775(6)  | 0.65090(6)  | 0.63997(5)  | 4.62(2)         |
| Si5  | 0.34206(5)  | 0.73403(6)  | 0.45552(5)  | 3.907(17)       |
| Si6  | 0.34741(6)  | 0.86775(7)  | 0.60824(5)  | 4.72(2)         |
| O1   | 0.68146(11) | 0.82983(11) | 0.65811(9)  | 3.09(3)         |
| O2   | 0.68126(11) | 0.75813(12) | 0.54174(9)  | 3.06(3)         |
| O3   | 0.84822(12) | 0.86795(12) | 0.59436(12) | 3.98(4)         |
| C1   | 0.9711(3)   | 0.7845(3)   | 0.8352(2)   | 6.42(10)        |
| C2   | 1.1027(2)   | 0.7460(2)   | 0.7476(2)   | 4.80(7)         |
| C3   | 1.0454(3)   | 0.6212(3)   | 0.8373(2)   | 5.86(9)         |
| C4   | 1.0144(2)   | 0.6658(2)   | 0.55304(19) | 4.77(7)         |
| C5   | 1.0538(2)   | 0.5345(2)   | 0.6573(2)   | 5.34(8)         |
| C6   | 0.8846(2)   | 0.5303(2)   | 0.5482(2)   | 5.21(7)         |
| C7   | 0.8580(3)   | 0.4758(2)   | 0.7484(2)   | 5.65(9)         |
| C8   | 0.6959(2)   | 0.5547(2)   | 0.66289(19) | 4.85(7)         |
| C9   | 0.7710(3)   | 0.6114(3)   | 0.80817(19) | 5.55(8)         |
| C10  | 0.4849(3)   | 0.6574(3)   | 0.7277(2)   | 5.88(9)         |
| C11  | 0.4338(3)   | 0.5579(2)   | 0.5968(3)   | 7.59(13)        |
| C12  | 0.2924(3)   | 0.6410(4)   | 0.6554(3)   | 9.7(2)          |
| C13  | 0.3942(3)   | 0.6591(3)   | 0.4069(2)   | 6.51(11)        |
| C14  | 0.2294(2)   | 0.6928(3)   | 0.4576(2)   | 6.12(9)         |
| C15  | 0.3262(3)   | 0.8269(3)   | 0.4027(2)   | 6.48(10)        |
| C16  | 0.2232(2)   | 0.8572(3)   | 0.5810(3)   | 7.21(12)        |
| C17  | 0.3763(3)   | 0.9633(3)   | 0.5713(3)   | 7.20(12)        |
| C18  | 0.3710(3)   | 0.8756(4)   | 0.7050(2)   | 8.94(17)        |
| C19  | 0.68186(19) | 0.88576(18) | 0.71259(14) | 3.54(5)         |
| C20  | 0.6332(4)   | 0.9574(3)   | 0.6820(3)   | 8.71(16)        |
| C21  | 0.6336(6)   | 0.8487(4)   | 0.7626(3)   | 10.9(2)         |
| C22  | 0.7729(3)   | 0.9029(5)   | 0.7486(4)   | 14.0(3)         |
| C23  | 0.67580(18) | 0.72688(18) | 0.47354(13) | 3.21(5)         |
| C24  | 0.6143(2)   | 0.7797(2)   | 0.42266(15) | 4.19(6)         |
| C25  | 0.6415(3)   | 0.6436(2)   | 0.47181(18) | 4.78(7)         |
| C26  | 0.7691(2)   | 0.7280(2)   | 0.45904(17) | 4.71(7)         |
| C27  | 0.9433(2)   | 0.8748(2)   | 0.6093(2)   | 5.53(9)         |
| C28  | 0.9633(3)   | 0.9153(4)   | 0.5488(3)   | 8.49(15)        |
| C29  | 0.8830(3)   | 0.9552(3)   | 0.5134(3)   | 7.40(13)        |
| C30  | 0.8125(2)   | 0.9311(2)   | 0.5484(3)   | 6.24(10)        |

$$B_{eq} = 8/3 \pi^2 (U_{11}(aa^*)^2 + U_{22}(bb^*)^2 + U_{33}(cc^*)^2 + 2U_{12}(aa^*bb^*)\cos \gamma + 2U_{13}(aa^*cc^*)\cos \beta + 2U_{23}(bb^*cc^*)\cos \alpha)$$

Table S4-3. Anisotropic displacement parameters

| atom | U <sub>11</sub> | U <sub>22</sub> | U <sub>33</sub> | U <sub>12</sub> | U <sub>13</sub> | U <sub>23</sub> |
|------|-----------------|-----------------|-----------------|-----------------|-----------------|-----------------|
| Ge1  | 0.02321(13)     | 0.03178(14)     | 0.03761(14)     | 0.00174(9)      | 0.01078(10)     | 0.00454(10)     |
| Ge2  | 0.02006(13)     | 0.04228(16)     | 0.03895(15)     | 0.00021(10)     | 0.00927(10)     | 0.00107(11)     |
| Fe1  | 0.02088(16)     | 0.03066(18)     | 0.03294(18)     | -0.00132(12)    | 0.00940(12)     | 0.00404(13)     |
| Fe2  | 0.02026(16)     | 0.03791(19)     | 0.03255(17)     | -0.00161(13)    | 0.00925(12)     | -0.00359(13)    |
| Si1  | 0.0315(4)       | 0.0512(4)       | 0.0457(4)       | 0.0023(3)       | 0.0018(3)       | 0.0040(3)       |
| Si2  | 0.0325(4)       | 0.0441(4)       | 0.0578(5)       | 0.0078(3)       | 0.0217(3)       | -0.0007(4)      |
| Si3  | 0.0336(4)       | 0.0380(4)       | 0.0494(4)       | 0.0010(3)       | 0.0166(3)       | 0.0119(3)       |
| Si4  | 0.0330(4)       | 0.0686(6)       | 0.0716(6)       | -0.0116(4)      | 0.0063(4)       | 0.0271(5)       |
| Si5  | 0.0339(4)       | 0.0639(5)       | 0.0469(4)       | -0.0125(4)      | 0.0004(3)       | -0.0013(4)      |
| Si6  | 0.0385(4)       | 0.0775(7)       | 0.0629(5)       | 0.0251(4)       | 0.0099(4)       | -0.0093(5)      |
| O1   | 0.0269(8)       | 0.0470(10)      | 0.0433(10)      | 0.0027(7)       | 0.0067(7)       | -0.0173(8)      |
| O2   | 0.0261(8)       | 0.0636(12)      | 0.0288(8)       | 0.0003(8)       | 0.0104(7)       | -0.0064(8)      |
| O3   | 0.0270(9)       | 0.0504(11)      | 0.0730(13)      | -0.0066(8)      | 0.0087(9)       | 0.0286(10)      |
| C1   | 0.055(2)        | 0.113(3)        | 0.067(2)        | 0.015(2)        | -0.0059(18)     | -0.032(2)       |
| C2   | 0.0361(16)      | 0.069(2)        | 0.074(2)        | -0.0098(15)     | 0.0026(15)      | 0.0061(18)      |
| C3   | 0.057(2)        | 0.086(3)        | 0.069(2)        | 0.000(2)        | -0.0098(17)     | 0.029(2)        |
| C4   | 0.0522(18)      | 0.072(2)        | 0.068(2)        | 0.0092(16)      | 0.0371(16)      | 0.0068(17)      |
| C5   | 0.0525(19)      | 0.062(2)        | 0.093(3)        | 0.0258(17)      | 0.0262(18)      | 0.007(2)        |
| C6   | 0.061(2)        | 0.059(2)        | 0.082(2)        | 0.0025(17)      | 0.0258(18)      | -0.0227(18)     |
| C7   | 0.060(2)        | 0.0472(18)      | 0.113(3)        | 0.0092(16)      | 0.032(2)        | 0.031(2)        |
| C8   | 0.0415(16)      | 0.066(2)        | 0.076(2)        | -0.0167(15)     | 0.0113(15)      | 0.0152(18)      |
| C9   | 0.081(3)        | 0.080(2)        | 0.062(2)        | -0.012(2)       | 0.0390(19)      | 0.0057(19)      |
| C10  | 0.056(2)        | 0.094(3)        | 0.068(2)        | -0.007(2)       | 0.0037(17)      | 0.031(2)        |
| C11  | 0.098(3)        | 0.047(2)        | 0.126(4)        | -0.019(2)       | -0.017(3)       | 0.013(2)        |
| C12  | 0.046(2)        | 0.178(6)        | 0.145(5)        | -0.020(3)       | 0.020(3)        | 0.098(5)        |
| C13  | 0.065(2)        | 0.104(3)        | 0.076(3)        | -0.022(2)       | 0.010(2)        | -0.041(2)       |
| C14  | 0.0403(18)      | 0.104(3)        | 0.081(3)        | -0.028(2)       | -0.0026(17)     | 0.006(2)        |
| C15  | 0.078(3)        | 0.098(3)        | 0.058(2)        | -0.021(2)       | -0.012(2)       | 0.021(2)        |
| C16  | 0.0409(19)      | 0.125(4)        | 0.109(3)        | 0.038(2)        | 0.019(2)        | -0.001(3)       |
| C17  | 0.074(3)        | 0.060(2)        | 0.131(4)        | 0.023(2)        | 0.003(3)        | -0.011(3)       |
| C18  | 0.088(3)        | 0.176(6)        | 0.078(3)        | 0.063(4)        | 0.021(2)        | -0.033(3)       |
| C19  | 0.0413(14)      | 0.0478(15)      | 0.0429(14)      | 0.0050(12)      | 0.0037(11)      | -0.0192(12)     |
| C20  | 0.180(6)        | 0.060(2)        | 0.082(3)        | 0.042(3)        | 0.010(3)        | -0.018(2)       |
| C21  | 0.246(9)        | 0.126(5)        | 0.063(3)        | -0.027(5)       | 0.081(4)        | -0.030(3)       |
| C22  | 0.057(3)        | 0.246(8)        | 0.202(7)        | 0.023(4)        | -0.031(4)       | -0.181(7)       |
| C23  | 0.0380(14)      | 0.0573(16)      | 0.0293(12)      | 0.0014(12)      | 0.0132(10)      | -0.0025(11)     |
| C24  | 0.0507(17)      | 0.072(2)        | 0.0355(14)      | 0.0068(15)      | 0.0070(12)      | 0.0039(14)      |
| C25  | 0.072(2)        | 0.0578(19)      | 0.0513(17)      | -0.0046(17)     | 0.0124(16)      | -0.0076(15)     |
| C26  | 0.0465(17)      | 0.094(3)        | 0.0448(16)      | 0.0080(17)      | 0.0239(14)      | -0.0034(16)     |
| C27  | 0.0299(15)      | 0.073(2)        | 0.104(3)        | -0.0144(15)     | 0.0076(16)      | 0.037(2)        |
| C28  | 0.073(3)        | 0.123(4)        | 0.145(5)        | 0.005(3)        | 0.065(3)        | 0.062(4)        |
| C29  | 0.089(3)        | 0.102(3)        | 0.086(3)        | -0.035(3)       | 0.010(2)        | 0.047(3)        |

C30      0.0476(19)    0.065(2)      0.121(3)      -0.0028(17)      0.011(2)      0.056(2)  
The general temperature factor expression:  $\exp(-2\pi^2(a^2U_{11}h^2 + b^2U_{22}k^2 + c^2U_{33}l^2 + 2a*b*U_{12}hk + 2a*c*U_{13}hl + 2b*c*U_{23}kl))$

Table S4-4. Bond lengths (Å)

| atom | atom | distance   | atom | atom | distance   |
|------|------|------------|------|------|------------|
| Ge1  | Fe1  | 2.5155(5)  | Ge1  | Si1  | 2.3951(8)  |
| Ge1  | Si2  | 2.3908(10) | Ge1  | Si3  | 2.3795(9)  |
| Ge2  | Fe2  | 2.4841(6)  | Ge2  | Si4  | 2.3840(11) |
| Ge2  | Si5  | 2.3922(10) | Ge2  | Si6  | 2.3821(12) |
| Fe1  | O1   | 2.0151(19) | Fe1  | O2   | 2.0075(16) |
| Fe1  | O3   | 2.071(2)   | Fe2  | O1   | 1.9291(16) |
| Fe2  | O2   | 1.9263(19) | Si1  | C1   | 1.879(5)   |
| Si1  | C2   | 1.878(4)   | Si1  | C3   | 1.878(4)   |
| Si2  | C4   | 1.881(4)   | Si2  | C5   | 1.884(4)   |
| Si2  | C6   | 1.880(4)   | Si3  | C7   | 1.876(4)   |
| Si3  | C8   | 1.873(3)   | Si3  | C9   | 1.875(4)   |
| Si4  | C10  | 1.881(4)   | Si4  | C11  | 1.878(5)   |
| Si4  | C12  | 1.880(5)   | Si5  | C13  | 1.875(5)   |
| Si5  | C14  | 1.885(4)   | Si5  | C15  | 1.875(5)   |
| Si6  | C16  | 1.886(4)   | Si6  | C17  | 1.870(5)   |
| Si6  | C18  | 1.870(5)   | O1   | C19  | 1.433(3)   |
| O2   | C23  | 1.432(3)   | O3   | C27  | 1.439(4)   |
| O3   | C30  | 1.434(5)   | C19  | C20  | 1.486(6)   |
| C19  | C21  | 1.498(8)   | C19  | C22  | 1.462(6)   |
| C23  | C24  | 1.517(4)   | C23  | C25  | 1.506(5)   |
| C23  | C26  | 1.529(5)   | C27  | C28  | 1.469(8)   |
| C28  | C29  | 1.453(7)   | C29  | C30  | 1.469(7)   |

Table S4-5. Bond angles (°)

| atom | atom | atom | angle      | atom | atom | atom | angle      |
|------|------|------|------------|------|------|------|------------|
| Fe1  | Ge1  | Si1  | 119.06(3)  | Fe1  | Ge1  | Si2  | 115.72(3)  |
| Fe1  | Ge1  | Si3  | 106.78(2)  | Si1  | Ge1  | Si2  | 103.47(3)  |
| Si1  | Ge1  | Si3  | 105.68(3)  | Si2  | Ge1  | Si3  | 104.91(3)  |
| Fe2  | Ge2  | Si4  | 107.53(3)  | Fe2  | Ge2  | Si5  | 118.94(3)  |
| Fe2  | Ge2  | Si6  | 112.82(3)  | Si4  | Ge2  | Si5  | 106.67(4)  |
| Si4  | Ge2  | Si6  | 106.21(4)  | Si5  | Ge2  | Si6  | 103.88(3)  |
| Ge1  | Fe1  | O1   | 130.64(5)  | Ge1  | Fe1  | O2   | 125.75(6)  |
| Ge1  | Fe1  | O3   | 110.27(5)  | O1   | Fe1  | O2   | 80.49(7)   |
| O1   | Fe1  | O3   | 101.71(8)  | O2   | Fe1  | O3   | 101.94(8)  |
| Ge2  | Fe2  | O1   | 137.83(6)  | Ge2  | Fe2  | O2   | 136.65(5)  |
| O1   | Fe2  | O2   | 84.76(8)   | Ge1  | Si1  | C1   | 113.20(12) |
| Ge1  | Si1  | C2   | 111.48(12) | Ge1  | Si1  | C3   | 112.74(12) |
| C1   | Si1  | C2   | 106.61(19) | C1   | Si1  | C3   | 105.69(19) |
| C2   | Si1  | C3   | 106.63(17) | Ge1  | Si2  | C4   | 112.09(12) |
| Ge1  | Si2  | C5   | 112.60(14) | Ge1  | Si2  | C6   | 112.14(13) |
| C4   | Si2  | C5   | 105.81(17) | C4   | Si2  | C6   | 107.75(17) |

|     |     |     |            |     |     |     |            |
|-----|-----|-----|------------|-----|-----|-----|------------|
| C5  | Si2 | C6  | 106.01(16) | Ge1 | Si3 | C7  | 115.13(14) |
| Ge1 | Si3 | C8  | 109.78(12) | Ge1 | Si3 | C9  | 110.04(14) |
| C7  | Si3 | C8  | 107.01(16) | C7  | Si3 | C9  | 107.7(2)   |
| C8  | Si3 | C9  | 106.80(17) | Ge2 | Si4 | C10 | 111.00(15) |
| Ge2 | Si4 | C11 | 109.52(17) | Ge2 | Si4 | C12 | 113.5(2)   |
| C10 | Si4 | C11 | 108.2(2)   | C10 | Si4 | C12 | 106.8(2)   |
| C11 | Si4 | C12 | 107.6(3)   | Ge2 | Si5 | C13 | 114.27(12) |
| Ge2 | Si5 | C14 | 111.41(14) | Ge2 | Si5 | C15 | 109.87(13) |
| C13 | Si5 | C14 | 105.1(2)   | C13 | Si5 | C15 | 107.6(2)   |
| C14 | Si5 | C15 | 108.3(2)   | Ge2 | Si6 | C16 | 113.16(17) |
| Ge2 | Si6 | C17 | 110.48(17) | Ge2 | Si6 | C18 | 112.3(2)   |
| C16 | Si6 | C17 | 106.6(2)   | C16 | Si6 | C18 | 105.0(2)   |
| C17 | Si6 | C18 | 109.0(3)   | Fe1 | O1  | Fe2 | 95.41(8)   |
| Fe1 | O1  | C19 | 132.16(15) | Fe2 | O1  | C19 | 132.30(16) |
| Fe1 | O2  | Fe2 | 95.75(8)   | Fe1 | O2  | C23 | 134.54(16) |
| Fe2 | O2  | C23 | 129.33(15) | Fe1 | O3  | C27 | 124.3(2)   |
| Fe1 | O3  | C30 | 127.54(18) | C27 | O3  | C30 | 107.8(3)   |
| O1  | C19 | C20 | 108.4(3)   | O1  | C19 | C21 | 107.2(3)   |
| O1  | C19 | C22 | 110.1(4)   | C20 | C19 | C21 | 109.4(4)   |
| C20 | C19 | C22 | 112.6(4)   | C21 | C19 | C22 | 109.0(4)   |
| O2  | C23 | C24 | 107.7(2)   | O2  | C23 | C25 | 108.5(2)   |
| O2  | C23 | C26 | 107.8(2)   | C24 | C23 | C25 | 111.8(2)   |
| C24 | C23 | C26 | 110.5(3)   | C25 | C23 | C26 | 110.4(3)   |
| O3  | C27 | C28 | 104.8(3)   | C27 | C28 | C29 | 107.5(4)   |
| C28 | C29 | C30 | 106.7(4)   | O3  | C30 | C29 | 106.4(3)   |

Table S4-6. Torsion Angles(°)

(Those having bond angles > 160 or < 20 degrees are excluded.)

| atom1 | atom2 | atom3 | atom4 | angle     | atom1 | atom2 | atom3 | atom4 | angle     |
|-------|-------|-------|-------|-----------|-------|-------|-------|-------|-----------|
| Fe1   | Ge1   | Si1   | C1    | 35.58(5)  | Fe1   | Ge1   | Si1   | C2    | -84.61(4) |
| Fe1   | Ge1   | Si1   | C3    | 155.50(3) | Si1   | Ge1   | Fe1   | O1    | -72.95(4) |
| Si1   | Ge1   | Fe1   | O2    | 176.59(3) | Si1   | Ge1   | Fe1   | O3    | 54.07(4)  |
| Fe1   | Ge1   | Si2   | C4    | 50.96(4)  | Fe1   | Ge1   | Si2   | C5    | 170.14(3) |
| Fe1   | Ge1   | Si2   | C6    | -70.39(4) | Si2   | Ge1   | Fe1   | O1    | 162.75(3) |
| Si2   | Ge1   | Fe1   | O2    | 52.29(4)  | Si2   | Ge1   | Fe1   | O3    | -70.23(3) |
| Fe1   | Ge1   | Si3   | C7    | 162.08(3) | Fe1   | Ge1   | Si3   | C8    | 41.27(4)  |
| Fe1   | Ge1   | Si3   | C9    | -75.99(3) | Si3   | Ge1   | Fe1   | O1    | 46.42(3)  |
| Si3   | Ge1   | Fe1   | O2    | -64.04(3) | Si3   | Ge1   | Fe1   | O3    | 173.44(2) |
| Si1   | Ge1   | Si2   | C4    | -81.09(4) | Si1   | Ge1   | Si2   | C5    | 38.08(5)  |
| Si1   | Ge1   | Si2   | C6    | 157.55(4) | Si2   | Ge1   | Si1   | C1    | 165.65(4) |
| Si2   | Ge1   | Si1   | C2    | 45.46(5)  | Si2   | Ge1   | Si1   | C3    | -74.44(5) |
| Si1   | Ge1   | Si3   | C7    | -70.22(4) | Si1   | Ge1   | Si3   | C8    | 168.98(3) |
| Si1   | Ge1   | Si3   | C9    | 51.71(4)  | Si3   | Ge1   | Si1   | C1    | -84.35(4) |
| Si3   | Ge1   | Si1   | C2    | 155.46(4) | Si3   | Ge1   | Si1   | C3    | 35.57(5)  |
| Si2   | Ge1   | Si3   | C7    | 38.76(4)  | Si2   | Ge1   | Si3   | C8    | -82.05(4) |
| Si2   | Ge1   | Si3   | C9    | 160.69(3) | Si3   | Ge1   | Si2   | C4    | 168.33(3) |
| Si3   | Ge1   | Si2   | C5    | -72.49(4) | Si3   | Ge1   | Si2   | C6    | 46.98(4)  |

|     |     |     |     |             |     |     |     |     |             |
|-----|-----|-----|-----|-------------|-----|-----|-----|-----|-------------|
| Fe2 | Ge2 | Si4 | C10 | 42.17(5)    | Fe2 | Ge2 | Si4 | C11 | -77.25(4)   |
| Fe2 | Ge2 | Si4 | C12 | 162.47(4)   | Si4 | Ge2 | Fe2 | O1  | -72.76(4)   |
| Si4 | Ge2 | Fe2 | O2  | 93.48(4)    | Fe2 | Ge2 | Si5 | C13 | 47.43(6)    |
| Fe2 | Ge2 | Si5 | C14 | 166.37(3)   | Fe2 | Ge2 | Si5 | C15 | -73.65(5)   |
| Si5 | Ge2 | Fe2 | O1  | 166.02(3)   | Si5 | Ge2 | Fe2 | O2  | -27.74(4)   |
| Fe2 | Ge2 | Si6 | C16 | 169.44(4)   | Fe2 | Ge2 | Si6 | C17 | 50.06(5)    |
| Fe2 | Ge2 | Si6 | C18 | -71.87(5)   | Si6 | Ge2 | Fe2 | O1  | 44.01(4)    |
| Si6 | Ge2 | Fe2 | O2  | -149.75(3)  | Si4 | Ge2 | Si5 | C13 | -74.23(5)   |
| Si4 | Ge2 | Si5 | C14 | 44.71(5)    | Si4 | Ge2 | Si5 | C15 | 164.70(4)   |
| Si5 | Ge2 | Si4 | C10 | 170.80(4)   | Si5 | Ge2 | Si4 | C11 | 51.38(5)    |
| Si5 | Ge2 | Si4 | C12 | -68.90(5)   | Si4 | Ge2 | Si6 | C16 | -73.00(5)   |
| Si4 | Ge2 | Si6 | C17 | 167.62(4)   | Si4 | Ge2 | Si6 | C18 | 45.68(6)    |
| Si6 | Ge2 | Si4 | C10 | -78.85(5)   | Si6 | Ge2 | Si4 | C11 | 161.73(4)   |
| Si6 | Ge2 | Si4 | C12 | 41.45(5)    | Si5 | Ge2 | Si6 | C16 | 39.30(6)    |
| Si5 | Ge2 | Si6 | C17 | -80.08(5)   | Si5 | Ge2 | Si6 | C18 | 157.98(5)   |
| Si6 | Ge2 | Si5 | C13 | 173.80(5)   | Si6 | Ge2 | Si5 | C14 | -67.26(5)   |
| Si6 | Ge2 | Si5 | C15 | 52.73(5)    | Ge1 | Fe1 | O1  | Fe2 | -115.49(6)  |
| Ge1 | Fe1 | O1  | C19 | 68.34(17)   | Ge1 | Fe1 | O2  | Fe2 | 119.78(6)   |
| Ge1 | Fe1 | O2  | C23 | -53.4(2)    | Ge1 | Fe1 | O3  | C27 | -4.89(18)   |
| Ge1 | Fe1 | O3  | C30 | 166.80(14)  | O1  | Fe1 | O2  | Fe2 | -14.09(8)   |
| O1  | Fe1 | O2  | C23 | 172.76(19)  | O2  | Fe1 | O1  | Fe2 | 14.06(8)    |
| O2  | Fe1 | O1  | C19 | -162.10(17) | O1  | Fe1 | O3  | C27 | 136.89(15)  |
| O1  | Fe1 | O3  | C30 | -51.43(18)  | O3  | Fe1 | O1  | Fe2 | 114.40(8)   |
| O3  | Fe1 | O1  | C19 | -61.76(16)  | O2  | Fe1 | O3  | C27 | -140.50(16) |
| O2  | Fe1 | O3  | C30 | 31.18(19)   | O3  | Fe1 | O2  | Fe2 | -114.17(9)  |
| O3  | Fe1 | O2  | C23 | 72.69(19)   | Ge2 | Fe2 | O1  | Fe1 | 156.03(4)   |
| Ge2 | Fe2 | O1  | C19 | -27.8(2)    | Ge2 | Fe2 | O2  | Fe1 | -156.18(3)  |
| Ge2 | Fe2 | O2  | C23 | 17.5(2)     | O1  | Fe2 | O2  | Fe1 | 14.59(8)    |
| O1  | Fe2 | O2  | C23 | -171.73(17) | O2  | Fe2 | O1  | Fe1 | -14.53(8)   |
| O2  | Fe2 | O1  | C19 | 161.63(17)  | Fe1 | O1  | C19 | C20 | 123.74(18)  |
| Fe1 | O1  | C19 | C21 | -118.33(19) | Fe1 | O1  | C19 | C22 | 0.2(3)      |
| Fe2 | O1  | C19 | C20 | -51.1(3)    | Fe2 | O1  | C19 | C21 | 66.8(3)     |
| Fe2 | O1  | C19 | C22 | -174.69(13) | Fe1 | O2  | C23 | C24 | -138.16(17) |
| Fe1 | O2  | C23 | C25 | 100.6(2)    | Fe1 | O2  | C23 | C26 | -19.0(3)    |
| Fe2 | O2  | C23 | C24 | 50.7(3)     | Fe2 | O2  | C23 | C25 | -70.6(3)    |
| Fe2 | O2  | C23 | C26 | 169.88(13)  | Fe1 | O3  | C27 | C28 | 146.34(18)  |
| Fe1 | O3  | C30 | C29 | -149.59(17) | C27 | O3  | C30 | C29 | 23.2(4)     |
| C30 | O3  | C27 | C28 | -26.7(4)    | O3  | C27 | C28 | C29 | 20.0(5)     |
| C27 | C28 | C29 | C30 | -6.2(5)     | C28 | C29 | C30 | O3  | -10.2(5)    |
