# Supplementary material
Source: MDPI journal article supplement (https://www.mdpi.com/2073-4344/10/1/29)
Supplement: s1 [file s1]

## checkCIF (basic structural check) running

---

Checking for embedded fcf data in CIF ...

Found embedded fcf data in CIF. Extracting fcf data from uploaded CIF, please wait . . .

## checkCIF/PLATON (basic structural check)

---

Structure factors have been supplied for datablock(s) FeGeTMS32THF2

THIS REPORT IS FOR GUIDANCE ONLY. IF USED AS PART OF A REVIEW PROCEDURE FOR PUBLICATION, IT SHOULD NOT REPLACE THE EXPERTISE OF AN EXPERIENCED CRYSTALLOGRAPHIC REFEREE.

No syntax errors found.  
Please wait while processing ....

[CIF dictionary](#)  
[Interpreting this report](#)

[Structure factor report](#)

## Datablock: FeGeTMS32THF2

---

|                    |                                            |                                 |             |
|--------------------|--------------------------------------------|---------------------------------|-------------|
| Bond precision:    | C-C = 0.0135 A                             | Wavelength=0.71075              |             |
| Cell:              | a=13.851(4)                                | b=10.450(3)                     | c=19.003(6) |
|                    | alpha=90                                   | beta=110.932(4)                 | gamma=90    |
| Temperature:       | 183 K                                      |                                 |             |
|                    | Calculated                                 | Reported                        |             |
| Volume             | 2569.0(13)                                 | 2569.1(13)                      |             |
| Space group        | P 2/c                                      | P 1 2/c 1                       |             |
| Hall group         | -P 2yc                                     | -P 2yc                          |             |
| Moiety formula     | C26 H70 Fe Ge2 O2 Si6, 2(C4 O)             | C34 H70 Fe Ge2 O4 Si6           |             |
| Sum formula        | C34 H70 Fe Ge2 O4 Si6                      | C34 H70 Fe Ge2 O4 Si6           |             |
| Mr                 | 912.51                                     | 912.46                          |             |
| Dx,g cm-3          | 1.180                                      | 1.179                           |             |
| Z                  | 2                                          | 2                               |             |
| Mu (mm-1)          | 1.610                                      | 1.608                           |             |
| F000               | 960.0                                      | 960.0                           |             |
| F000'              | 962.45                                     |                                 |             |
| h,k,lmax           | 17,13,24                                   | 17,13,23                        |             |
| Nref               | 5907                                       | 5750                            |             |
| Tmin,Tmax          | 0.793,0.825                                | 0.694,0.824                     |             |
| Tmin'              | 0.786                                      |                                 |             |
| Correction method= | # Reported T Limits: Tmin=0.694 Tmax=0.824 |                                 |             |
| AbsCorr =          | MULTI-SCAN                                 |                                 |             |
| Data completeness= | 0.973                                      | Theta(max)= 27.483              |             |
| R(reflections)=    | 0.0604( 4106)                              | wR2(reflections)= 0.1814( 5750) |             |
| S =                | 1.055                                      | Npar= 188                       |             |

The following ALERTS were generated. Each ALERT has the format

**test-name\_ALERT\_alert-type\_alert-level.**

Click on the hyperlinks for more details of the test.

---

### 🟡 Alert level C

[RINTA01\\_ALERT\\_3\\_C](#) The value of Rint is greater than 0.12

Rint given 0.121

[PLAT202\\_ALERT\\_3\\_C](#) Isotropic non-H Atoms in Anion/Solvent ..... 5 Check

O2 C14 C15 C16 C17

[PLAT243\\_ALERT\\_4\\_C](#) High 'Solvent' Ueq as Compared to Neighbors of O2 Check

[PLAT244\\_ALERT\\_4\\_C](#) Low 'Solvent' Ueq as Compared to Neighbors of C15 Check

[PLAT244\\_ALERT\\_4\\_C](#) Low 'Solvent' Ueq as Compared to Neighbors of C17 Check

[PLAT341\\_ALERT\\_3\\_C](#) Low Bond Precision on C-C Bonds ..... 0.0135 Ang.

[PLAT906\\_ALERT\\_3\\_C](#) Large K Value in the Analysis of Variance ..... 3.731 Check

[PLAT910\\_ALERT\\_3\\_C](#) Missing # of FCF Reflection(s) Below Theta(Min). 9 Note

[PLAT911\\_ALERT\\_3\\_C](#) Missing FCF Refl Between Thmin & STh/L= 0.600 44 Report

[PLAT976\\_ALERT\\_2\\_C](#) Check Calcd Resid. Dens. 0.80A From O2 -0.46 eA-3

[PLAT978\\_ALERT\\_2\\_C](#) Number C-C Bonds with Positive Residual Density. 0 Info

---

**● Alert level G****CHEMS02\_ALERT\_1\_G** Please check that you have entered the correct

\_publ\_requested\_category classification of your compound;

FI or CI or EI for inorganic; FM or CM or EM for metal-organic;

FO or CO or EO for organic.

From the CIF: \_publ\_requested\_category CHOOSE FI FM FO CI CM CO or A

From the CIF: \_chemical\_formula\_sum : C34 H70 Fe1 Ge2 O4 Si6

**PLAT020\_ALERT\_3\_G** The Value of Rint is Greater Than 0.12 ..... 0.121 Report**PLAT042\_ALERT\_1\_G** Calc. and Reported MoietyFormula Strings Differ Please Check**PLAT344\_ALERT\_2\_G** Unusual sp? Angle Range in Solvent/Ion for C14 Check**And 3 other PLAT344 Alerts**

More ...

**PLAT367\_ALERT\_2\_G** Long? C(sp?)-C(sp?) Bond C15 - C16 . 1.53 Ang.**PLAT367\_ALERT\_2\_G** Long? C(sp?)-C(sp?) Bond C16 - C17 . 1.56 Ang.**PLAT912\_ALERT\_4\_G** Missing # of FCF Reflections Above STh/L= 0.600 82 Note**PLAT992\_ALERT\_5\_G** Repd & Actual \_reflns\_number\_gt Values Differ by 1 Check0 **ALERT level A** = Most likely a serious problem - resolve or explain0 **ALERT level B** = A potentially serious problem, consider carefully11 **ALERT level C** = Check. Ensure it is not caused by an omission or oversight11 **ALERT level G** = General information/check it is not something unexpected

2 ALERT type 1 CIF construction/syntax error, inconsistent or missing data

8 ALERT type 2 Indicator that the structure model may be wrong or deficient

7 ALERT type 3 Indicator that the structure quality may be low

4 ALERT type 4 Improvement, methodology, query or suggestion

1 ALERT type 5 Informative message, check

It is advisable to attempt to resolve as many as possible of the alerts in all categories. Often the minor alerts point to easily fixed oversights, errors and omissions in your CIF or refinement strategy, so attention to these fine details can be worthwhile. In order to resolve some of the more serious problems it may be necessary to carry out additional measurements or structure refinements. However, the purpose of your study may justify the reported deviations and the more serious of these should normally be commented upon in the discussion or experimental section of a paper or in the "special\_details" fields of the CIF. checkCIF was carefully designed to identify outliers and unusual parameters, but every test has its limitations and alerts that are not important in a particular case may appear. Conversely, the absence of alerts does not guarantee there are no aspects of the results needing attention. It is up to the individual to critically assess their own results and, if necessary, seek expert advice.

**Publication of your CIF in IUCr journals**

A basic structural check has been run on your CIF. These basic checks will be run on all CIFs submitted for publication in IUCr journals (*Acta Crystallographica*, *Journal of Applied Crystallography*, *Journal of Synchrotron Radiation*); however, if you intend to submit to *Acta Crystallographica Section C* or *E* or *IUCrData*, you should make sure that **full publication checks** are run on the final version of your CIF prior to submission.

**Publication of your CIF in other journals**

Please refer to the *Notes for Authors* of the relevant journal for any special instructions relating to CIF submission.

PLATON version of 07/08/2019; check.def file version of 30/07/2019

**Datablock FeGeTMS32THF2 - ellipsoid plot**

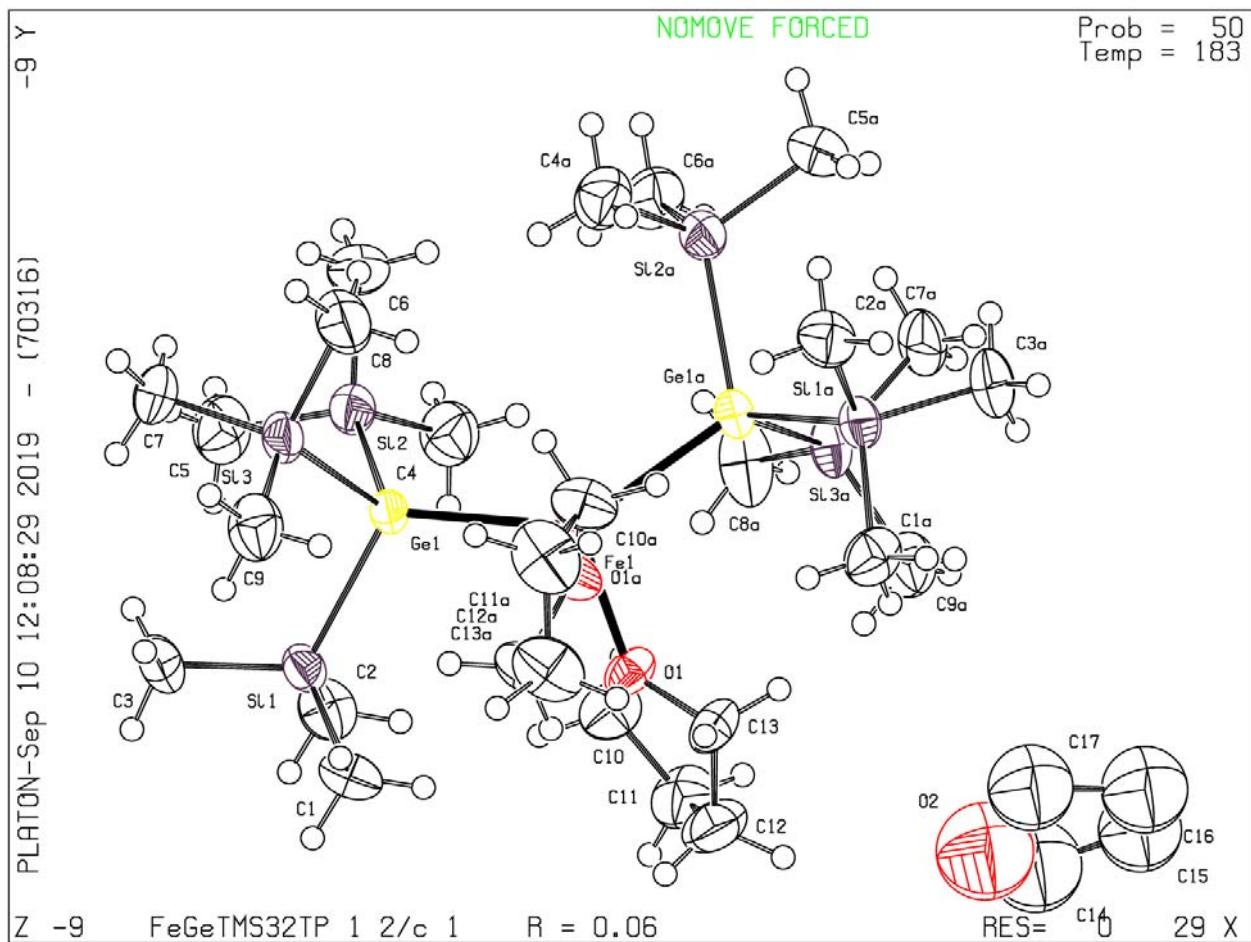

[Download CIF editor \(pubCIF\) from the IUCr](#)  
[Download CIF editor \(enCIFer\) from the CCDC](#)  
[Test a new CIF entry](#)

## checkCIF (basic structural check) running

---

Checking for embedded fcf data in CIF ...

Found embedded fcf data in CIF. Extracting fcf data from uploaded CIF, please wait . . . . .

## checkCIF/PLATON (basic structural check)

---

Structure factors have been supplied for datablock(s) THFMe3Si3GeFeu-OtBu2FeGeSiMe33

THIS REPORT IS FOR GUIDANCE ONLY. IF USED AS PART OF A REVIEW PROCEDURE FOR PUBLICATION, IT SHOULD NOT REPLACE THE EXPERTISE OF AN EXPERIENCED CRYSTALLOGRAPHIC REFEREE.

No syntax errors found.  
Please wait while processing ....

[CIF dictionary](#)  
[Interpreting this report](#)

[Structure factor report](#)

## Datablock: THFMe3Si3GeFeu-OtBu2FeGeSiMe33

---

|                    |                                            |                                  |
|--------------------|--------------------------------------------|----------------------------------|
| Bond precision:    | C-C = 0.0060 A                             | Wavelength=0.71075               |
| Cell:              | a=15.448(2)                                | b=16.956(2) c=19.743(3)          |
|                    | alpha=90                                   | beta=102.5078(18) gamma=90       |
| Temperature: 198 K |                                            |                                  |
|                    | Calculated                                 | Reported                         |
| Volume             | 5048.7(12)                                 | 5048.6(13)                       |
| Space group        | P 21/c                                     | P 1 21/c 1                       |
| Hall group         | -P 2ybc                                    | -P 2ybc                          |
| Moiety formula     | C30 H80 Fe2 Ge2 O3 Si6                     | C30 H80 Fe2 Ge2 O3 Si6           |
| Sum formula        | C30 H80 Fe2 Ge2 O3 Si6                     | C30 H80 Fe2 Ge2 O3 Si6           |
| Mr                 | 914.40                                     | 914.35                           |
| Dx, g cm-3         | 1.203                                      | 1.203                            |
| Z                  | 4                                          | 4                                |
| Mu (mm-1)          | 1.909                                      | 1.908                            |
| F000               | 1936.0                                     | 1936.0                           |
| F000'              | 1942.20                                    |                                  |
| h,k,lmax           | 20,22,25                                   | 20,22,25                         |
| Nref               | 11590                                      | 11471                            |
| Tmin,Tmax          | 0.570,0.683                                | 0.399,0.683                      |
| Tmin'              | 0.559                                      |                                  |
| Correction method= | # Reported T Limits: Tmin=0.399 Tmax=0.683 |                                  |
| AbsCorr =          | MULTI-SCAN                                 |                                  |
| Data completeness= | 0.990                                      | Theta(max)= 27.502               |
| R(reflections)=    | 0.0483( 10070)                             | wR2(reflections)= 0.1312( 11471) |
| S =                | 1.047                                      | Npar= 388                        |

---

The following ALERTS were generated. Each ALERT has the format

**test-name\_ALERT\_alert-type\_alert-level.**

Click on the hyperlinks for more details of the test.

---

### 🟡 Alert level B

|                                                                    |                                           |           |
|--------------------------------------------------------------------|-------------------------------------------|-----------|
| PLAT242_ALERT_2_B Low                                              | 'MainMol' Ueq as Compared to Neighbors of | C19 Check |
| PLAT910_ALERT_3_B Missing # of FCF Reflection(s) Below Theta(Min). |                                           | 21 Note   |

---

### 🟡 Alert level C

|                                        |                                           |            |
|----------------------------------------|-------------------------------------------|------------|
| PLAT213_ALERT_2_C Atom C22             | has ADP max/min Ratio .....               | 3.6 prolat |
| PLAT220_ALERT_2_C Non-Solvent Resd 1 C | Ueq(max)/Ueq(min) Range                   | 4.4 Ratio  |
| PLAT241_ALERT_2_C High                 | 'MainMol' Ueq as Compared to Neighbors of | C28 Check  |
| PLAT242_ALERT_2_C Low                  | 'MainMol' Ueq as Compared to Neighbors of | Ge2 Check  |

**And 5 other PLAT242 Alerts**

[More ...](#)

|                                                                    |       |           |
|--------------------------------------------------------------------|-------|-----------|
| PLAT911_ALERT_3_C Missing FCF Refl Between Thmin & STh/L=          | 0.600 | 66 Report |
| PLAT913_ALERT_3_C Missing # of Very Strong Reflections in FCF .... |       | 11 Note   |
| PLAT918_ALERT_3_C Reflection(s) with I(obs) much Smaller I(calc) . |       | 1 Check   |
| PLAT973_ALERT_2_C Check Calcd Positive Resid. Density on           | Fe1   | 1.11 eA-3 |

PLAT978\_ALERT\_2\_C Number C-C Bonds with Positive Residual Density.

0 Info

**Alert level G**

CHEMS02\_ALERT\_1\_G Please check that you have entered the correct

\_publ\_requested\_category classification of your compound;

FI or CI or EI for inorganic; FM or CM or EM for metal-organic;

FO or CO or EO for organic.

From the CIF: \_publ\_requested\_category CHOOSE FI FM FO CI CM CO or A

From the CIF: \_chemical\_formula\_sum : C30 H80 Fe2 Ge2 O3 Si6

PLAT912\_ALERT\_4\_G Missing # of FCF Reflections Above STh/L= 0.600

32 Note

0 **ALERT level A** = Most likely a serious problem - resolve or explain2 **ALERT level B** = A potentially serious problem, consider carefully14 **ALERT level C** = Check. Ensure it is not caused by an omission or oversight2 **ALERT level G** = General information/check it is not something unexpected

1 ALERT type 1 CIF construction/syntax error, inconsistent or missing data

12 ALERT type 2 Indicator that the structure model may be wrong or deficient

4 ALERT type 3 Indicator that the structure quality may be low

1 ALERT type 4 Improvement, methodology, query or suggestion

0 ALERT type 5 Informative message, check

It is advisable to attempt to resolve as many as possible of the alerts in all categories. Often the minor alerts point to easily fixed oversights, errors and omissions in your CIF or refinement strategy, so attention to these fine details can be worthwhile. In order to resolve some of the more serious problems it may be necessary to carry out additional measurements or structure refinements. However, the purpose of your study may justify the reported deviations and the more serious of these should normally be commented upon in the discussion or experimental section of a paper or in the "special\_details" fields of the CIF. checkCIF was carefully designed to identify outliers and unusual parameters, but every test has its limitations and alerts that are not important in a particular case may appear. Conversely, the absence of alerts does not guarantee there are no aspects of the results needing attention. It is up to the individual to critically assess their own results and, if necessary, seek expert advice.

**Publication of your CIF in IUCr journals**

A basic structural check has been run on your CIF. These basic checks will be run on all CIFs submitted for publication in IUCr journals (*Acta Crystallographica*, *Journal of Applied Crystallography*, *Journal of Synchrotron Radiation*); however, if you intend to submit to *Acta Crystallographica Section C* or *E* or *IUCrData*, you should make sure that **full publication checks** are run on the final version of your CIF prior to submission.

**Publication of your CIF in other journals**

Please refer to the *Notes for Authors* of the relevant journal for any special instructions relating to CIF submission.

PLATON version of 07/08/2019; check.def file version of 30/07/2019

**Datablock THFMe3Si3GeFeu-OtBu2FeGeSiMe33 - ellipsoid**  
plot

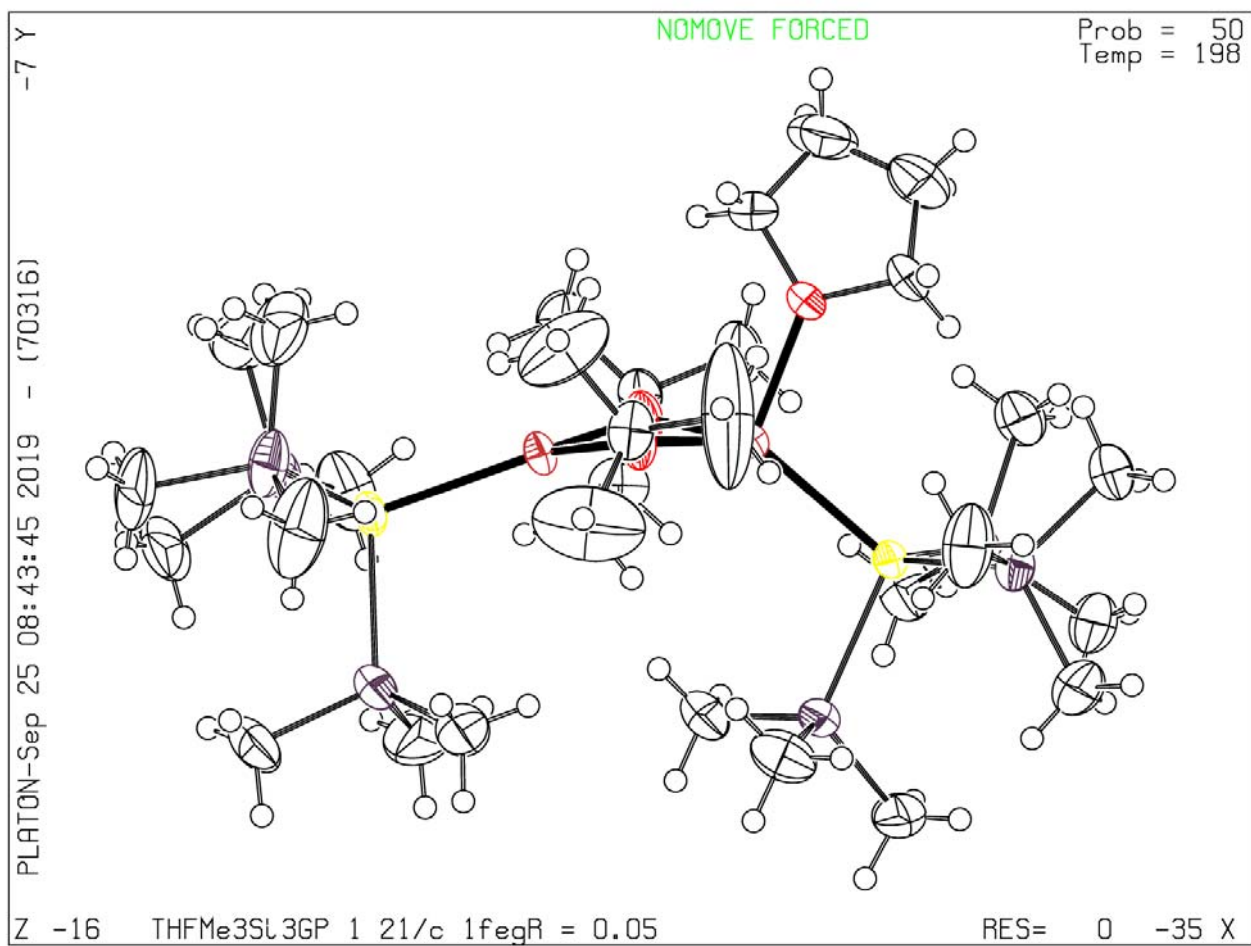

[Download CIF editor \(pubCIF\) from the IUCr](#)  
[Download CIF editor \(enCIFer\) from the CCDC](#)  
[Test a new CIF entry](#)
