# Supplementary material
Source: MDPI journal article supplement (https://www.mdpi.com/2073-4344/10/1/29)
Supplement: s1 [file s1 › supporting information revised/CIF-combined.cif]

data_global
_audit_creation_date                               2019-09-10
_audit_creation_method                            'by CrystalStructure 4.3'
_audit_update_record                               ?

#==============================================================================
# PROCESSING SUMMARY (IUCr Office Use Only)

_journal_date_recd_electronic                      ?
_journal_date_from_coeditor                        ?
_journal_date_accepted                             ?
_journal_coeditor_code                             ?

#==============================================================================
# SUBMISSION DETAILS

_publ_contact_author_name                         'ENTER NAME'
_publ_contact_author_email                        'ENTER EMAIL ADDRESS'
_publ_contact_author_fax                          'ENTER FAX NUMBER'
_publ_contact_author_phone                        'ENTER PHONE NUMBER'
_publ_contact_letter
;
    ENTER TEXT OF LETTER
;
_publ_requested_journal                           'ENTER JOURNAL NAME HERE'
_publ_requested_category
                                               'CHOOSE FI FM FO CI CM CO or AD'
_publ_requested_coeditor_name                      ?

#==============================================================================
# TITLE AND AUTHOR LIST

_publ_section_title
;
    ENTER SECTION TITLE
;
_publ_section_title_footnote
;
    ENTER FOOTNOTE TO TITLE OF PAPER
;
loop_
_publ_author_name
_publ_author_footnote
_publ_author_address
' FIRST AUTHORS NAME '
;
  FIRST AUTHORS FOOTNOTES
;
;
  FIRST AUTHORS ADDRESS
;
_publ_section_synopsis
;
    ENTER SYNOPSIS
;

#==============================================================================
# TEXT

_publ_section_abstract
;
    ENTER ABSTRACT
;
_publ_section_comment
;
    ENTER TEXT
;
_publ_section_references
;
    ENTER OTHER REFERENCES

    Rigaku (2018). CrystalStructure. Version 4.3. 
    Rigaku Corporation, Tokyo, Japan.

    Sheldrick, G. M. (2014). Acta Cryst. (2014). A70, C1437.
    SHELXT Version 2014/5

    Sheldrick, G.M. (2008) SHELXL Version 2017/1, Acta Cryst. A64, 112-122.

    Rigaku (1998). REQAB. 
    Rigaku Corporation, Tokyo, Japan.

;
_publ_section_figure_captions
;
    ENTER FIGURE CAPTIONS
;
_publ_section_exptl_prep
;
    ENTER COMPOUND PREPARATION DETAILS
;
_publ_section_exptl_refinement
;
    ENTER SPECIAL DETAILS OF THE REFINEMENT
;

#==============================================================================
data_Fe[Ge(TMS)3]2(THF)2

#==============================================================================
# CHEMICAL DATA

_chemical_formula_sum                             'C34 H70 Fe Ge2 O4 Si6'
_chemical_formula_moiety                          'C34 H70 Fe Ge2 O4 Si6'
_chemical_formula_weight                           912.46
_chemical_melting_point                            ?

#==============================================================================
# CRYSTAL DATA
_space_group_crystal_system                        monoclinic
_space_group_name_H-M_alt                         'P 1 2/c 1'
_space_group_name_Hall                            '-P 2yc'
_space_group_IT_number                             13
loop_
_space_group_symop_id
_space_group_symop_operation_xyz
1   '+X,+Y,+Z'
2   '-X,+Y,1/2-Z'
3   '-X,-Y,-Z'
4   '+X,-Y,-1/2+Z'
#------------------------------------------------------------------------------
_cell_length_a                                     13.851(4)
_cell_length_b                                     10.450(3)
_cell_length_c                                     19.003(6)
_cell_angle_alpha                                  90.0000
_cell_angle_beta                                   110.932(4)
_cell_angle_gamma                                  90.0000
_cell_volume                                       2569.1(13)
_cell_formula_units_Z                              2
_cell_measurement_reflns_used                      4719
_cell_measurement_theta_min                        3.01
_cell_measurement_theta_max                        27.45
_cell_measurement_temperature                      183
#------------------------------------------------------------------------------
_exptl_crystal_description                         block
_exptl_crystal_colour                              red
_exptl_crystal_size_max                            0.150
_exptl_crystal_size_mid                            0.120
_exptl_crystal_size_min                            0.120
_exptl_crystal_density_diffrn                      1.179
_exptl_crystal_density_meas                        ?
_exptl_crystal_density_method                     'not measured'
_exptl_crystal_F_000                               960.00
_exptl_absorpt_coefficient_mu                      1.608
_exptl_absorpt_correction_type                     multi-scan
_exptl_absorpt_process_details                    'REQAB (Rigaku, 1998)'
_exptl_absorpt_correction_T_min                    0.694
_exptl_absorpt_correction_T_max                    0.824

#==============================================================================
# EXPERIMENTAL DATA

_diffrn_ambient_temperature                        183
_diffrn_radiation_type                            'Mo K\a'
_diffrn_radiation_wavelength                       0.71075
_diffrn_measurement_device_type                   'Rigaku Saturn724'
_diffrn_measurement_method                         \w
_diffrn_detector_area_resol_mean                   7.111
_diffrn_reflns_number                              20941
_diffrn_reflns_av_unetI/netI                       0.0804
_diffrn_reflns_av_R_equivalents                    0.1206
_diffrn_reflns_theta_max                           27.483
_diffrn_reflns_theta_min                           3.011
_diffrn_reflns_theta_full                          25.242
_diffrn_measured_fraction_theta_max                0.973
_diffrn_measured_fraction_theta_full               0.989
_diffrn_reflns_Laue_measured_fraction_max          0.973
_diffrn_reflns_Laue_measured_fraction_full         0.989
_diffrn_reflns_point_group_measured_fraction_max   0.973
_diffrn_reflns_point_group_measured_fraction_full  0.989
_diffrn_reflns_limit_h_min                        -16
_diffrn_reflns_limit_h_max                         17
_diffrn_reflns_limit_k_min                        -13
_diffrn_reflns_limit_k_max                         13
_diffrn_reflns_limit_l_min                        -21
_diffrn_reflns_limit_l_max                         23
_diffrn_standards_number                           0
_diffrn_standards_interval_count                   .
_diffrn_standards_decay_%                          ?
_reflns_number_total                               5750
_reflns_number_gt                                  4106
_reflns_threshold_expression                       F^2^>2.0\s(F^2^)
_reflns_Friedel_coverage          0.000
_reflns_Friedel_fraction_max      .
_reflns_Friedel_fraction_full     .

#==============================================================================
# REFINEMENT DATA

_refine_special_details
;
    Refinement was performed using all reflections. The weighted 
    R-factor (wR) and goodness of fit (S) are based on F^2^.
    R-factor (gt) are based on F. The threshold expression of
    F^2^ > 2.0 sigma(F^2^) is used only for calculating R-factor (gt).
;
_refine_ls_structure_factor_coef                   Fsqd
_refine_ls_R_factor_all                            0.0838
_refine_ls_R_factor_gt                             0.0604
_refine_ls_wR_factor_ref                           0.1814
_refine_ls_wR_factor_gt                            0.1622
_refine_ls_number_restraints                       0
_refine_ls_hydrogen_treatment                      constr
_refine_ls_number_reflns                           5750
_refine_ls_number_parameters                       188
_refine_ls_goodness_of_fit_ref                     1.055
_refine_ls_weighting_scheme                        calc
_refine_ls_weighting_details
                   'w = 1/[\s^2^(Fo^2^)+(0.0971P)^2^] where P=(Fo^2^+2Fc^2^)/3'
_atom_sites_solution_hydrogens                     geom
_atom_sites_solution_primary                       direct
_atom_sites_solution_secondary                     difmap
_refine_ls_shift/su_max                            0.000
_refine_diff_density_max                           0.81
_refine_diff_density_min                          -1.02
_refine_ls_extinction_method                       none
_refine_ls_extinction_coef                         ?

loop_
_atom_type_symbol
_atom_type_description
_atom_type_scat_dispersion_real
_atom_type_scat_dispersion_imag
_atom_type_scat_source
  'C' 'C'  0.0033 0.0016 
;
International Tables for Crystallography
(Vol. C, Tables 4.2.6.8 and 6.1.1.4)
;
  'H' 'H'  0.0000 0.0000 
;
International Tables for Crystallography
(Vol. C, Table 6.1.1.4)
;
  'O' 'O'  0.0106 0.0060 
;
International Tables for Crystallography
(Vol. C, Tables 4.2.6.8 and 6.1.1.4)
;
  'Ge' 'Ge'  0.1547 1.8001 
;
International Tables for Crystallography
(Vol. C, Tables 4.2.6.8 and 6.1.1.4)
;
  'Fe' 'Fe'  0.3463 0.8444 
;
International Tables for Crystallography
(Vol. C, Tables 4.2.6.8 and 6.1.1.4)
;
  'Si' 'Si'  0.0817 0.0704 
;
International Tables for Crystallography
(Vol. C, Tables 4.2.6.8 and 6.1.1.4)
;

#==============================================================================
# ATOMIC COORDINATES AND THERMAL PARAMETERS

loop_
 _atom_site_label
 _atom_site_type_symbol
 _atom_site_fract_x
 _atom_site_fract_y
 _atom_site_fract_z
 _atom_site_U_iso_or_equiv
 _atom_site_adp_type
 _atom_site_occupancy
 _atom_site_site_symmetry_order  
 _atom_site_calc_flag
 _atom_site_refinement_flags_posn
 _atom_site_refinement_flags_adp
 _atom_site_refinement_flags_occupancy
 _atom_site_disorder_assembly
 _atom_site_disorder_group
Ge1 Ge 0.31867(3) 0.47638(4) 0.71739(2) 0.03477(16) Uani 1 1 d . . . . .
Fe1 Fe 0.500000 0.38223(7) 0.750000 0.0303(2) Uani 1 2 d S T P . .
Si1 Si 0.18075(9) 0.35443(13) 0.63096(7) 0.0407(3) Uani 1 1 d . . . . .
Si2 Si 0.29267(10) 0.68294(13) 0.66052(8) 0.0472(3) Uani 1 1 d . . . . .
Si3 Si 0.26420(10) 0.50633(14) 0.82240(7) 0.0458(3) Uani 1 1 d . . . . .
O1 O 0.4947(2) 0.2385(3) 0.67141(15) 0.0425(7) Uani 1 1 d . . . . .
O2 O 0.7655(8) -0.0249(8) 0.5965(5) 0.172(3) Uiso 1 1 d . . . . .
C1 C 0.2037(4) 0.1769(5) 0.6466(3) 0.0572(13) Uani 1 1 d . . . . .
H1A H 0.211901 0.155724 0.698671 0.069 Uiso 1 1 calc R U . . .
H1B H 0.144557 0.129921 0.611935 0.069 Uiso 1 1 calc R U . . .
H1C H 0.266503 0.152923 0.637339 0.069 Uiso 1 1 calc R U . . .
C2 C 0.1659(4) 0.3859(6) 0.5298(2) 0.0587(13) Uani 1 1 d . . . . .
H2A H 0.153813 0.477417 0.518940 0.070 Uiso 1 1 calc R U . . .
H2B H 0.229137 0.359858 0.521729 0.070 Uiso 1 1 calc R U . . .
H2C H 0.107192 0.336856 0.496325 0.070 Uiso 1 1 calc R U . . .
C3 C 0.0496(4) 0.3867(6) 0.6369(3) 0.0626(14) Uani 1 1 d . . . . .
H3A H 0.033717 0.478212 0.629095 0.075 Uiso 1 1 calc R U . . .
H3B H -0.003133 0.337382 0.597941 0.075 Uiso 1 1 calc R U . . .
H3C H 0.050079 0.361407 0.686664 0.075 Uiso 1 1 calc R U . . .
C4 C 0.3588(5) 0.6919(6) 0.5901(3) 0.0694(16) Uani 1 1 d . . . . .
H4A H 0.331340 0.625110 0.551985 0.083 Uiso 1 1 calc R U . . .
H4B H 0.346294 0.776055 0.565781 0.083 Uiso 1 1 calc R U . . .
H4C H 0.433256 0.679223 0.615842 0.083 Uiso 1 1 calc R U . . .
C5 C 0.1524(4) 0.7296(6) 0.6105(3) 0.0732(16) Uani 1 1 d . . . . .
H5A H 0.118013 0.665046 0.572370 0.088 Uiso 1 1 calc R U . . .
H5B H 0.117650 0.734951 0.647202 0.088 Uiso 1 1 calc R U . . .
H5C H 0.148951 0.812959 0.586089 0.088 Uiso 1 1 calc R U . . .
C6 C 0.3490(5) 0.8130(5) 0.7313(3) 0.0701(15) Uani 1 1 d . . . . .
H6A H 0.316289 0.811510 0.769270 0.084 Uiso 1 1 calc R U . . .
H6B H 0.423573 0.799319 0.755819 0.084 Uiso 1 1 calc R U . . .
H6C H 0.336611 0.896150 0.705758 0.084 Uiso 1 1 calc R U . . .
C7 C 0.1496(4) 0.6147(6) 0.8022(3) 0.0605(14) Uani 1 1 d . . . . .
H7A H 0.164770 0.697393 0.784135 0.073 Uiso 1 1 calc R U . . .
H7B H 0.089566 0.575819 0.763468 0.073 Uiso 1 1 calc R U . . .
H7C H 0.134613 0.627406 0.848318 0.073 Uiso 1 1 calc R U . . .
C8 C 0.3691(4) 0.5799(7) 0.9044(3) 0.079(2) Uani 1 1 d . . . . .
H8A H 0.390705 0.661103 0.888782 0.095 Uiso 1 1 calc R U . . .
H8B H 0.343242 0.595562 0.945335 0.095 Uiso 1 1 calc R U . . .
H8C H 0.428346 0.521531 0.921911 0.095 Uiso 1 1 calc R U . . .
C9 C 0.2273(4) 0.3536(6) 0.8559(3) 0.0654(15) Uani 1 1 d . . . . .
H9A H 0.172365 0.312173 0.814389 0.078 Uiso 1 1 calc R U . . .
H9B H 0.287632 0.296979 0.873808 0.078 Uiso 1 1 calc R U . . .
H9C H 0.202527 0.371011 0.897232 0.078 Uiso 1 1 calc R U . . .
C10 C 0.4460(4) 0.2630(5) 0.5905(2) 0.0553(13) Uani 1 1 d . . . . .
H10A H 0.465787 0.348561 0.577804 0.066 Uiso 1 1 calc R U . . .
H10B H 0.369749 0.259303 0.574847 0.066 Uiso 1 1 calc R U . . .
C11 C 0.4841(5) 0.1610(7) 0.5526(3) 0.0736(18) Uani 1 1 d . . . . .
H11A H 0.540768 0.193269 0.537134 0.088 Uiso 1 1 calc R U . . .
H11B H 0.427690 0.128661 0.507558 0.088 Uiso 1 1 calc R U . . .
C12 C 0.5227(5) 0.0574(6) 0.6115(3) 0.0724(16) Uani 1 1 d . . . . .
H12A H 0.465657 0.000354 0.611667 0.087 Uiso 1 1 calc R U . . .
H12B H 0.577452 0.005470 0.603214 0.087 Uiso 1 1 calc R U . . .
C13 C 0.5641(4) 0.1321(5) 0.6826(3) 0.0520(12) Uani 1 1 d . . . . .
H13A H 0.564758 0.079868 0.726192 0.062 Uiso 1 1 calc R U . . .
H13B H 0.635312 0.161978 0.691275 0.062 Uiso 1 1 calc R U . . .
C14 C 0.7928(11) 0.0019(12) 0.5338(7) 0.156(4) Uiso 1 1 d . . . . .
C15 C 0.9064(9) 0.0013(10) 0.5634(6) 0.125(3) Uiso 1 1 d . . . . .
C16 C 0.9427(9) -0.0219(10) 0.6486(6) 0.135(4) Uiso 1 1 d . . . . .
C17 C 0.8413(10) -0.0100(10) 0.6661(7) 0.131(3) Uiso 1 1 d . . . . .

loop_
 _atom_site_aniso_label
 _atom_site_aniso_U_11
 _atom_site_aniso_U_22
 _atom_site_aniso_U_33
 _atom_site_aniso_U_23
 _atom_site_aniso_U_13
 _atom_site_aniso_U_12
Ge1 0.0260(2) 0.0410(3) 0.0371(3) -0.00454(17) 0.01105(18) -0.00032(16)
Fe1 0.0292(4) 0.0319(4) 0.0305(4) 0.000 0.0115(3) 0.000
Si1 0.0296(6) 0.0497(7) 0.0394(6) -0.0043(5) 0.0080(5) -0.0038(5)
Si2 0.0394(6) 0.0406(7) 0.0621(8) 0.0006(6) 0.0188(6) 0.0018(5)
Si3 0.0324(6) 0.0640(9) 0.0442(7) -0.0123(6) 0.0176(5) -0.0031(5)
O1 0.0498(17) 0.0446(18) 0.0305(14) -0.0035(12) 0.0112(13) 0.0139(14)
C1 0.060(3) 0.054(3) 0.049(3) -0.007(2) 0.010(2) -0.018(2)
C2 0.054(3) 0.075(4) 0.039(3) 0.007(2) 0.007(2) 0.001(3)
C3 0.033(2) 0.080(4) 0.070(3) -0.013(3) 0.014(2) -0.008(2)
C4 0.070(4) 0.069(4) 0.080(4) 0.004(3) 0.040(3) -0.003(3)
C5 0.060(3) 0.059(4) 0.095(4) 0.021(3) 0.021(3) 0.015(3)
C6 0.073(4) 0.044(3) 0.097(4) -0.012(3) 0.034(3) -0.008(3)
C7 0.049(3) 0.069(4) 0.076(3) -0.013(3) 0.038(3) 0.004(3)
C8 0.053(3) 0.126(6) 0.062(3) -0.039(4) 0.024(3) -0.016(4)
C9 0.059(3) 0.087(4) 0.058(3) 0.003(3) 0.030(3) 0.001(3)
C10 0.068(3) 0.063(3) 0.028(2) 0.002(2) 0.008(2) 0.011(3)
C11 0.078(4) 0.097(5) 0.046(3) -0.021(3) 0.023(3) 0.009(3)
C12 0.082(4) 0.063(4) 0.068(4) -0.022(3) 0.021(3) 0.013(3)
C13 0.055(3) 0.050(3) 0.051(3) -0.003(2) 0.021(2) 0.019(2)

#==============================================================================
_computing_data_collection
                                             'CrystalClear (Rigaku Inc., 2008)'
_computing_cell_refinement                         CrystalClear
_computing_data_reduction                          CrystalClear
_computing_structure_solution
                                      'SHELXT Version 2014/5 (Sheldrick, 2014)'
_computing_structure_refinement
                                      'SHELXL Version 2017/1 (Sheldrick, 2008)'
_computing_publication_material
                                          'CrystalStructure 4.3 (Rigaku, 2018)'
_computing_molecular_graphics                     'CrystalStructure 4.3'

#==============================================================================
# MOLECULAR GEOMETRY

_geom_special_details
;
 All esds (except the esd in the dihedral angle between two l.s. planes)
 are estimated using the full covariance matrix.  The cell esds are taken
 into account individually in the estimation of esds in distances, angles
 and torsion angles; correlations between esds in cell parameters are only
 used when they are defined by crystal symmetry.  An approximate (isotropic)
 treatment of cell esds is used for estimating esds involving l.s. planes.
;

loop_
 _geom_bond_atom_site_label_1
 _geom_bond_atom_site_label_2
 _geom_bond_distance
 _geom_bond_site_symmetry_2
 _geom_bond_publ_flag
Ge1 Si2 2.3831(15) . ?
Ge1 Si3 2.3926(14) . ?
Ge1 Si1 2.3936(13) . ?
Ge1 Fe1 2.5590(8) . ?
Fe1 O1 2.101(3) 2_656 ?
Fe1 O1 2.101(3) . ?
Si1 C1 1.888(6) . ?
Si1 C2 1.887(4) . ?
Si1 C3 1.891(5) . ?
Si2 C6 1.875(6) . ?
Si2 C4 1.874(5) . ?
Si2 C5 1.897(6) . ?
Si3 C9 1.856(6) . ?
Si3 C8 1.874(5) . ?
Si3 C7 1.874(5) . ?
O1 C13 1.435(5) . ?
O1 C10 1.464(5) . ?
O2 C17 1.374(13) . ?
O2 C14 1.401(12) . ?
C1 H1A 0.9800 . ?
C1 H1B 0.9800 . ?
C1 H1C 0.9800 . ?
C2 H2A 0.9800 . ?
C2 H2B 0.9800 . ?
C2 H2C 0.9800 . ?
C3 H3A 0.9800 . ?
C3 H3B 0.9800 . ?
C3 H3C 0.9800 . ?
C4 H4A 0.9800 . ?
C4 H4B 0.9800 . ?
C4 H4C 0.9800 . ?
C5 H5A 0.9800 . ?
C5 H5B 0.9800 . ?
C5 H5C 0.9800 . ?
C6 H6A 0.9800 . ?
C6 H6B 0.9800 . ?
C6 H6C 0.9800 . ?
C7 H7A 0.9800 . ?
C7 H7B 0.9800 . ?
C7 H7C 0.9800 . ?
C8 H8A 0.9800 . ?
C8 H8B 0.9800 . ?
C8 H8C 0.9800 . ?
C9 H9A 0.9800 . ?
C9 H9B 0.9800 . ?
C9 H9C 0.9800 . ?
C10 C11 1.486(7) . ?
C10 H10A 0.9900 . ?
C10 H10B 0.9900 . ?
C11 C12 1.511(9) . ?
C11 H11A 0.9900 . ?
C11 H11B 0.9900 . ?
C12 C13 1.487(7) . ?
C12 H12A 0.9900 . ?
C12 H12B 0.9900 . ?
C13 H13A 0.9900 . ?
C13 H13B 0.9900 . ?
C14 C15 1.470(15) . ?
C15 C16 1.533(13) . ?
C16 C17 1.560(15) . ?

loop_
 _geom_angle_atom_site_label_1
 _geom_angle_atom_site_label_2
 _geom_angle_atom_site_label_3
 _geom_angle
 _geom_angle_site_symmetry_1
 _geom_angle_site_symmetry_3
 _geom_angle_publ_flag
Si2 Ge1 Si3 102.61(5) . . ?
Si2 Ge1 Si1 102.52(5) . . ?
Si3 Ge1 Si1 103.29(5) . . ?
Si2 Ge1 Fe1 115.74(4) . . ?
Si3 Ge1 Fe1 115.02(4) . . ?
Si1 Ge1 Fe1 115.79(4) . . ?
O1 Fe1 O1 88.70(16) 2_656 . ?
O1 Fe1 Ge1 108.70(8) 2_656 2_656 ?
O1 Fe1 Ge1 103.26(9) . 2_656 ?
O1 Fe1 Ge1 103.26(9) 2_656 . ?
O1 Fe1 Ge1 108.70(8) . . ?
Ge1 Fe1 Ge1 134.77(4) 2_656 . ?
C1 Si1 C2 106.4(2) . . ?
C1 Si1 C3 106.1(3) . . ?
C2 Si1 C3 105.8(2) . . ?
C1 Si1 Ge1 111.53(16) . . ?
C2 Si1 Ge1 112.06(18) . . ?
C3 Si1 Ge1 114.36(18) . . ?
C6 Si2 C4 106.9(3) . . ?
C6 Si2 C5 105.2(3) . . ?
C4 Si2 C5 107.7(3) . . ?
C6 Si2 Ge1 112.0(2) . . ?
C4 Si2 Ge1 109.6(2) . . ?
C5 Si2 Ge1 115.0(2) . . ?
C9 Si3 C8 107.1(3) . . ?
C9 Si3 C7 105.9(3) . . ?
C8 Si3 C7 105.7(3) . . ?
C9 Si3 Ge1 112.40(17) . . ?
C8 Si3 Ge1 111.41(17) . . ?
C7 Si3 Ge1 113.83(17) . . ?
C13 O1 C10 108.9(3) . . ?
C13 O1 Fe1 126.7(3) . . ?
C10 O1 Fe1 120.5(3) . . ?
C17 O2 C14 116.8(10) . . ?
Si1 C1 H1A 109.5 . . ?
Si1 C1 H1B 109.5 . . ?
H1A C1 H1B 109.5 . . ?
Si1 C1 H1C 109.5 . . ?
H1A C1 H1C 109.5 . . ?
H1B C1 H1C 109.5 . . ?
Si1 C2 H2A 109.5 . . ?
Si1 C2 H2B 109.5 . . ?
H2A C2 H2B 109.5 . . ?
Si1 C2 H2C 109.5 . . ?
H2A C2 H2C 109.5 . . ?
H2B C2 H2C 109.5 . . ?
Si1 C3 H3A 109.5 . . ?
Si1 C3 H3B 109.5 . . ?
H3A C3 H3B 109.5 . . ?
Si1 C3 H3C 109.5 . . ?
H3A C3 H3C 109.5 . . ?
H3B C3 H3C 109.5 . . ?
Si2 C4 H4A 109.5 . . ?
Si2 C4 H4B 109.5 . . ?
H4A C4 H4B 109.5 . . ?
Si2 C4 H4C 109.5 . . ?
H4A C4 H4C 109.5 . . ?
H4B C4 H4C 109.5 . . ?
Si2 C5 H5A 109.5 . . ?
Si2 C5 H5B 109.5 . . ?
H5A C5 H5B 109.5 . . ?
Si2 C5 H5C 109.5 . . ?
H5A C5 H5C 109.5 . . ?
H5B C5 H5C 109.5 . . ?
Si2 C6 H6A 109.5 . . ?
Si2 C6 H6B 109.5 . . ?
H6A C6 H6B 109.5 . . ?
Si2 C6 H6C 109.5 . . ?
H6A C6 H6C 109.5 . . ?
H6B C6 H6C 109.5 . . ?
Si3 C7 H7A 109.5 . . ?
Si3 C7 H7B 109.5 . . ?
H7A C7 H7B 109.5 . . ?
Si3 C7 H7C 109.5 . . ?
H7A C7 H7C 109.5 . . ?
H7B C7 H7C 109.5 . . ?
Si3 C8 H8A 109.5 . . ?
Si3 C8 H8B 109.5 . . ?
H8A C8 H8B 109.5 . . ?
Si3 C8 H8C 109.5 . . ?
H8A C8 H8C 109.5 . . ?
H8B C8 H8C 109.5 . . ?
Si3 C9 H9A 109.5 . . ?
Si3 C9 H9B 109.5 . . ?
H9A C9 H9B 109.5 . . ?
Si3 C9 H9C 109.5 . . ?
H9A C9 H9C 109.5 . . ?
H9B C9 H9C 109.5 . . ?
O1 C10 C11 105.9(4) . . ?
O1 C10 H10A 110.6 . . ?
C11 C10 H10A 110.6 . . ?
O1 C10 H10B 110.6 . . ?
C11 C10 H10B 110.6 . . ?
H10A C10 H10B 108.7 . . ?
C10 C11 C12 104.3(4) . . ?
C10 C11 H11A 110.9 . . ?
C12 C11 H11A 110.9 . . ?
C10 C11 H11B 110.9 . . ?
C12 C11 H11B 110.9 . . ?
H11A C11 H11B 108.9 . . ?
C13 C12 C11 102.5(5) . . ?
C13 C12 H12A 111.3 . . ?
C11 C12 H12A 111.3 . . ?
C13 C12 H12B 111.3 . . ?
C11 C12 H12B 111.3 . . ?
H12A C12 H12B 109.2 . . ?
O1 C13 C12 104.6(4) . . ?
O1 C13 H13A 110.8 . . ?
C12 C13 H13A 110.8 . . ?
O1 C13 H13B 110.8 . . ?
C12 C13 H13B 110.8 . . ?
H13A C13 H13B 108.9 . . ?
O2 C14 C15 104.5(10) . . ?
C14 C15 C16 107.9(9) . . ?
C15 C16 C17 103.5(10) . . ?
O2 C17 C16 102.8(9) . . ?

loop_
 _geom_torsion_atom_site_label_1
 _geom_torsion_atom_site_label_2
 _geom_torsion_atom_site_label_3
 _geom_torsion_atom_site_label_4
 _geom_torsion
 _geom_torsion_site_symmetry_1
 _geom_torsion_site_symmetry_2
 _geom_torsion_site_symmetry_3
 _geom_torsion_site_symmetry_4
 _geom_torsion_publ_flag
C13 O1 C10 C11 3.5(6) . . . . ?
Fe1 O1 C10 C11 162.6(4) . . . . ?
O1 C10 C11 C12 19.3(6) . . . . ?
C10 C11 C12 C13 -34.2(6) . . . . ?
C10 O1 C13 C12 -25.4(6) . . . . ?
Fe1 O1 C13 C12 177.2(3) . . . . ?
C11 C12 C13 O1 36.5(6) . . . . ?
C17 O2 C14 C15 16.8(14) . . . . ?
O2 C14 C15 C16 -2.5(12) . . . . ?
C14 C15 C16 C17 -9.7(11) . . . . ?
C14 O2 C17 C16 -22.7(13) . . . . ?
C15 C16 C17 O2 18.2(10) . . . . ?


#==============================================================================
# Additional structures and associated data_? identifiers
# should be added at this point if there is more than one 
# structure analysis in the CIF.

_shelx_res_file
;
TITL Fe[Ge(TMS)3]2(THF)2
    shelxl.res
    created by SHELXL-2017/1 at 20:07:42 on 10-Sep-2019
CELL  0.71075 13.85070 10.45030 19.00340 90.00000 110.93160 90.00000
ZERR  2 0.00400 0.00280 0.00560 0.00000 0.00420 0.00000
LATT 1
SYMM    -X,    +Y, .50-Z
SFAC C H O GE FE SI
UNIT 68 140 8 4 2 12
L.S. 20
FMAP 2
PLAN 25
WPDB -2
HTAB
BOND $H
CONF
LIST 4
TEMP -89.8
ACTA
SIZE 0.150 0.120 0.120
WGHT    0.097100
FVAR       0.41423
GE1   4    0.318665    0.476384    0.717393    11.00000    0.02601    0.04098 =
         0.03714   -0.00454    0.01105   -0.00032
FE1   5    0.500000    0.382232    0.750000    10.50000    0.02922    0.03188 =
         0.03048    0.00000    0.01149    0.00000
SI1   6    0.180748    0.354429    0.630963    11.00000    0.02960    0.04967 =
         0.03942   -0.00426    0.00802   -0.00377
SI2   6    0.292668    0.682935    0.660518    11.00000    0.03938    0.04060 =
         0.06205    0.00057    0.01880    0.00182
SI3   6    0.264198    0.506326    0.822401    11.00000    0.03242    0.06398 =
         0.04420   -0.01231    0.01757   -0.00311
O1    3    0.494665    0.238464    0.671414    11.00000    0.04985    0.04457 =
         0.03047   -0.00352    0.01118    0.01386
O2    3    0.765497   -0.024897    0.596455    11.00000    0.17245
C1    1    0.203684    0.176909    0.646607    11.00000    0.06007    0.05433 =
         0.04921   -0.00658    0.00991   -0.01757
AFIX  33
H1A   2    0.211901    0.155724    0.698671    11.00000   -1.20000
H1B   2    0.144557    0.129921    0.611935    11.00000   -1.20000
H1C   2    0.266503    0.152923    0.637339    11.00000   -1.20000
AFIX   0
C2    1    0.165943    0.385925    0.529835    11.00000    0.05396    0.07472 =
         0.03920    0.00721    0.00675    0.00094
AFIX  33
H2A   2    0.153813    0.477417    0.518940    11.00000   -1.20000
H2B   2    0.229137    0.359858    0.521729    11.00000   -1.20000
H2C   2    0.107192    0.336856    0.496325    11.00000   -1.20000
AFIX   0
C3    1    0.049555    0.386749    0.636878    11.00000    0.03332    0.08016 =
         0.07035   -0.01345    0.01366   -0.00783
AFIX  33
H3A   2    0.033717    0.478212    0.629095    11.00000   -1.20000
H3B   2   -0.003133    0.337382    0.597941    11.00000   -1.20000
H3C   2    0.050079    0.361407    0.686664    11.00000   -1.20000
AFIX   0
C4    1    0.358772    0.691900    0.590140    11.00000    0.07005    0.06908 =
         0.08001    0.00401    0.04009   -0.00273
AFIX  33
H4A   2    0.331340    0.625110    0.551985    11.00000   -1.20000
H4B   2    0.346294    0.776055    0.565781    11.00000   -1.20000
H4C   2    0.433256    0.679223    0.615842    11.00000   -1.20000
AFIX   0
C5    1    0.152367    0.729613    0.610501    11.00000    0.06030    0.05860 =
         0.09533    0.02066    0.02122    0.01470
AFIX  33
H5A   2    0.118013    0.665046    0.572370    11.00000   -1.20000
H5B   2    0.117650    0.734951    0.647202    11.00000   -1.20000
H5C   2    0.148951    0.812959    0.586089    11.00000   -1.20000
AFIX   0
C6    1    0.349008    0.812998    0.731286    11.00000    0.07304    0.04365 =
         0.09688   -0.01240    0.03431   -0.00811
AFIX  33
H6A   2    0.316289    0.811510    0.769270    11.00000   -1.20000
H6B   2    0.423573    0.799319    0.755819    11.00000   -1.20000
H6C   2    0.336611    0.896150    0.705758    11.00000   -1.20000
AFIX   0
C7    1    0.149622    0.614656    0.802167    11.00000    0.04942    0.06900 =
         0.07614   -0.01331    0.03831    0.00436
AFIX  33
H7A   2    0.164770    0.697393    0.784135    11.00000   -1.20000
H7B   2    0.089566    0.575819    0.763468    11.00000   -1.20000
H7C   2    0.134613    0.627406    0.848318    11.00000   -1.20000
AFIX   0
C8    1    0.369142    0.579908    0.904388    11.00000    0.05321    0.12602 =
         0.06197   -0.03948    0.02444   -0.01640
AFIX  33
H8A   2    0.390705    0.661103    0.888782    11.00000   -1.20000
H8B   2    0.343242    0.595562    0.945335    11.00000   -1.20000
H8C   2    0.428346    0.521531    0.921911    11.00000   -1.20000
AFIX   0
C9    1    0.227329    0.353597    0.855912    11.00000    0.05887    0.08709 =
         0.05774    0.00284    0.03011    0.00143
AFIX  33
H9A   2    0.172365    0.312173    0.814389    11.00000   -1.20000
H9B   2    0.287632    0.296979    0.873808    11.00000   -1.20000
H9C   2    0.202527    0.371011    0.897232    11.00000   -1.20000
AFIX   0
C10   1    0.445973    0.263045    0.590548    11.00000    0.06814    0.06256 =
         0.02787    0.00201    0.00826    0.01141
AFIX  23
H10A  2    0.465787    0.348561    0.577804    11.00000   -1.20000
H10B  2    0.369749    0.259303    0.574847    11.00000   -1.20000
AFIX   0
C11   1    0.484140    0.160999    0.552604    11.00000    0.07825    0.09723 =
         0.04577   -0.02086    0.02274    0.00935
AFIX  23
H11A  2    0.540768    0.193269    0.537134    11.00000   -1.20000
H11B  2    0.427690    0.128661    0.507558    11.00000   -1.20000
AFIX   0
C12   1    0.522657    0.057361    0.611489    11.00000    0.08179    0.06252 =
         0.06791   -0.02157    0.02074    0.01277
AFIX  23
H12A  2    0.465657    0.000354    0.611667    11.00000   -1.20000
H12B  2    0.577452    0.005470    0.603214    11.00000   -1.20000
AFIX   0
C13   1    0.564136    0.132125    0.682579    11.00000    0.05547    0.05044 =
         0.05150   -0.00341    0.02086    0.01894
AFIX  23
H13A  2    0.564758    0.079868    0.726192    11.00000   -1.20000
H13B  2    0.635312    0.161978    0.691275    11.00000   -1.20000
AFIX   0
C14   1    0.792801    0.001869    0.533760    11.00000    0.15596
C15   1    0.906440    0.001251    0.563362    11.00000    0.12518
C16   1    0.942738   -0.021879    0.648560    11.00000    0.13535
C17   1    0.841348   -0.009957    0.666132    11.00000    0.13128
HKLF 4


REM  Fe[Ge(TMS)3]2(THF)2
REM R1 =  0.0604 for    4106 Fo > 4sig(Fo)  and  0.0838 for all    5750 data
REM    188 parameters refined using      0 restraints

END

WGHT      0.0971      0.0000

REM No hydrogen bonds found for HTAB generation

REM Highest difference peak  0.815,  deepest hole -1.023,  1-sigma level  0.106
Q1    1   0.7435  0.0117  0.5643  11.00000  0.05    0.81
Q2    1   0.5000  0.6672  0.7500  10.50000  0.05    0.77
Q3    1   0.9282  0.0512  0.6401  11.00000  0.05    0.76
Q4    1   0.7933 -0.0664  0.5414  11.00000  0.05    0.72
Q5    1   0.7857 -0.0463  0.6301  11.00000  0.05    0.69
Q6    1   0.5000  0.5717  0.7500  10.50000  0.05    0.64
Q7    1   0.5564  0.4654  0.7446  11.00000  0.05    0.63
Q8    1   0.1343  0.3764  0.6848  11.00000  0.05    0.62
Q9    1   0.3761  0.3940  0.7088  11.00000  0.05    0.59
Q10   1   0.9266 -0.0780  0.6313  11.00000  0.05    0.53
Q11   1   0.8781  0.0670  0.5593  11.00000  0.05    0.53
Q12   1   0.2661  0.3993  0.7336  11.00000  0.05    0.50
Q13   1   0.3176  0.5904  0.7245  11.00000  0.05    0.49
Q14   1   0.3497  0.4687  0.6614  11.00000  0.05    0.48
Q15   1   0.8020  0.0757  0.5299  11.00000  0.05    0.48
Q16   1   0.3677  0.5587  0.7098  11.00000  0.05    0.47
Q17   1   0.5585  0.2981  0.7394  11.00000  0.05    0.44
Q18   1   0.2355  0.7605  0.6708  11.00000  0.05    0.44
Q19   1   0.5333  0.3727  0.6899  11.00000  0.05    0.43
Q20   1   0.5631  0.3699  0.8028  11.00000  0.05    0.42
Q21   1   0.2620  0.5597  0.7263  11.00000  0.05    0.41
Q22   1   0.1191  0.4456  0.6329  11.00000  0.05    0.39
Q23   1   0.2361  0.4757  0.6692  11.00000  0.05    0.36
Q24   1   0.3839  0.4936  0.7685  11.00000  0.05    0.36
Q25   1   0.3488  0.7612  0.6564  11.00000  0.05    0.35
;

_shelx_res_checksum    5233

_shelx_hkl_file
;
   0   0  -3   -1.79    4.00
   0   0   3   -1.13    4.44
   0   0  -4 1762.20   32.16
   0   0   4 1765.59   33.33
   0   0  -5   -7.67    5.71
   0   0   5   -6.44    9.38
   0   0  -6    3.35    3.98
   0   0   6    2.29    6.27
   0   0  -7    1.93    3.45
   0   0   7    4.75    6.13
   0   0  -8   30.70   11.57
   0   0   8   25.22    6.74
   0   0  -9   -4.11    4.67
   0   0   9   10.72    7.38
   0   0  10   67.00    7.02
   0   0  11    4.75    6.82
   0   0  12    1.92    4.53
   0   0  13   -3.77    7.88
   0   0  14   10.38   10.09
   0   0  15    7.14    5.10
   0   0  16   74.87   18.20
   0   0  17    3.12    5.37
   0   0  18   27.39    9.62
   0   0  19    6.10    5.31
   0   0  20   24.99   11.02
   0   0  21    5.66    6.23
   0   0  22    9.09   12.62
   0   0  23    6.11    5.79
   0   1  -2 6820.40  110.48
   0   1   2 5287.28   85.77
   0  -1  -2 5931.98   95.93
   0   1  -3   34.11    6.22
   0   1   3   27.29   17.97
   0   1  -3   39.22    6.57
   0   1   3   45.21   11.30
   0  -1   3   43.00   11.41
   0  -1  -3   37.56    9.85
   0  -1   3   47.81   14.23
   0  -1  -3   35.18    6.71
   0   1  -4  982.75   31.70
   0   1   4  938.61   23.36
   0   1  -4  917.05   16.23
   0  -1   4 1066.86   20.98
   0  -1   4 1048.70   18.04
   0   1   5    2.98    3.46
   0   1  -5    8.13    7.23
   0   1  -5   -0.36    2.98
   0   1   5    5.16    7.88
   0  -1   5    3.68    7.47
   0  -1   5   10.41    3.36
   0  -1  -5    5.99    4.25
   0  -1  -5   14.68    6.29
   0   1  -6   28.99   16.66
   0   1  -6   16.58    8.18
   0   1   6    8.39    1.99
   0   1   6   23.81    6.50
   0  -1  -6   27.60    5.69
   0  -1   6   29.90    2.25
   0  -1   6   17.00   12.76
   0  -1  -6   25.61   15.42
   0   1  -7   -1.50    1.52
   0   1  -7    2.21    2.39
   0   1   7    8.21    6.27
   0  -1   7   -0.86    5.97
   0  -1  -7    0.43    0.67
   0  -1   7   -0.73    1.15
   0  -1  -7    1.26    1.56
   0  -1  -7    2.06    2.77
   0   1  -8  104.64    6.76
   0   1  -8   63.91    4.00
   0   1   8   90.10    8.00
   0  -1   8  111.38   12.36
   0  -1   8  110.52    8.54
   0  -1  -8  105.18    5.92
   0  -1  -8   93.33   10.19
   0   1  -9  375.71   14.98
   0   1   9  379.52   17.21
   0   1  -9  222.11    8.56
   0  -1   9  403.96   17.18
   0  -1  -9  394.25   17.28
   0   1  10   59.08   21.47
   0  -1  10   50.60   23.12
   0   1  11    1.26    7.19
   0  -1  11    3.56    7.41
   0   1  12   72.97   10.34
   0  -1  12   72.27    7.32
   0   1  13    4.69    7.52
   0  -1  13   21.36   11.32
   0   1  14  104.71   10.60
   0  -1  14  132.40   11.82
   0   1  15   35.65   11.90
   0  -1  15   35.37    8.46
   0   1  16   89.29   25.64
   0  -1  16   96.61   33.10
   0   1  17   77.95   11.77
   0  -1  17   83.21   13.79
   0   1  18    6.41    7.81
   0  -1  18   16.42    9.21
   0   1  19   14.71    7.69
   0  -1  19    7.41    3.54
   0   1  20   50.74   11.81
   0  -1  20   41.57   10.04
   0   1  21    8.99    6.91
   0  -1  21   10.89    9.65
   0   1  22    7.24    8.48
   0  -1  22   -0.90    9.56
   0   2   0 2062.26   36.39
   0   2   0 2547.44   42.24
   0  -2   0 2563.60   43.04
   0   2   1  371.02   17.48
   0   2  -1  422.62   15.71
   0   2  -1  366.92   18.07
   0  -2   1  449.80   18.43
   0  -2   1  373.41   16.04
   0  -2  -1  480.11   19.18
   0  -2  -1  362.69   14.42
   0   2  -2  909.58   21.15
   0   2   2  901.03   21.14
   0  -2  -2  771.92   16.81
   0  -2  -2  955.86   19.85
   0  -2   2 1031.85   20.91
   0   2  -3  871.63   30.54
   0   2   3  632.86   23.37
   0   2  -3  743.65   25.67
   0   2   3  706.88   23.89
   0  -2   3  810.65   26.67
   0  -2   3  905.83   30.53
   0  -2  -3  791.08   25.83
   0  -2  -3  666.66   22.94
   0   2  -4 1625.99   27.79
   0   2   4 1233.03   24.90
   0   2   4 1286.53   22.15
   0  -2   4 1639.89   29.54
   0  -2  -4 1345.26   24.43
   0   2   5  349.08   12.44
   0   2  -5  458.85   16.00
   0   2  -5  405.96   14.83
   0   2   5  376.54   15.11
   0  -2   5  468.39   16.69
   0  -2  -5  462.55   16.08
   0  -2   5  450.65   15.23
   0  -2  -5  395.62   15.02
   0   2  -6  117.36    7.24
   0   2  -6  101.53    7.01
   0   2   6   96.13    9.33
   0   2   6   88.83    6.33
   0  -2   6  113.32   12.38
   0  -2  -6  100.94    7.95
   0  -2   6  119.74   10.34
   0  -2  -6  115.90    6.78
   0   2  -7 1308.40   32.99
   0   2  -7 1052.92   27.73
   0   2   7  851.02   21.25
   0   2   7 1151.41   38.25
   0  -2   7 1336.64   32.59
   0  -2  -7 1287.94   31.24
   0  -2   7 1373.12   38.50
   0  -2  -7 1207.37   30.29
   0   2  -8  112.35    5.62
   0   2   8   75.34    4.44
   0   2  -8   98.13    5.09
   0   2   8  106.48    7.82
   0  -2   8  132.57    6.19
   0  -2  -8  137.51    6.25
   0  -2   8  135.17   25.98
   0  -2  -8  114.12    6.89
   0   2   9  673.01   18.22
   0   2   9 1109.99   30.99
   0   2  -9  957.15   25.95
   0  -2  -9 1380.88   36.55
   0  -2   9 1365.16   36.15
   0  -2   9 1359.96   39.53
   0   2 -10  228.43    9.40
   0   2  10  280.90   12.29
   0  -2 -10  336.41   12.37
   0  -2  10  351.43   11.79
   0  -2 -10  383.79   13.06
   0  -2  10  357.44   15.84
   0   2 -11    4.58    2.90
   0   2  11    9.86    8.02
   0  -2 -11    4.71    2.35
   0  -2  11    3.15    2.76
   0  -2 -11    3.45    2.56
   0  -2  11   15.33    7.58
   0   2  12  406.70   15.48
   0  -2  12  475.34   17.18
   0  -2  12  450.74   12.26
   0   2  13   72.96   12.27
   0  -2  13   94.13   30.01
   0  -2  13   85.96    2.85
   0   2  14  142.89    9.68
   0  -2  14  153.38   13.25
   0   2  15   -3.20    8.32
   0  -2  15    1.38    6.12
   0   2  16   72.17   26.90
   0  -2  16   76.42   13.76
   0   2  17   95.12    8.54
   0  -2  17  124.24   26.75
   0   2  18   87.28   10.02
   0  -2  18   92.42   12.68
   0   2  19   -2.08    7.29
   0  -2  19    9.24    5.08
   0   2  20   58.37    9.35
   0  -2  20   60.40    9.00
   0   2  21    5.59    8.52
   0  -2  21   16.83    9.59
   0   2  22   12.67   10.36
   0  -2  22    5.02    7.21
   0   3   0  485.03   17.01
   0  -3   0  497.73   18.85
   0  -3   0  397.85   15.23
   0   3  -1 1337.34   24.93
   0   3   1 1678.18   29.33
   0   3   1 1323.81   25.30
   0  -3  -1 1657.27   28.50
   0  -3   1 1663.66   29.63
   0   3   2 1843.72   32.85
   0   3  -2 2223.98   37.53
   0   3  -2 1836.76   32.16
   0  -3   2 2279.70   39.07
   0  -3  -2 1541.88   26.89
   0  -3  -2 2389.67   40.64
   0   3  -3  373.30   13.46
   0   3   3  242.00   12.40
   0   3  -3  312.48   13.90
   0   3   3  275.42   12.02
   0  -3   3  315.96   11.28
   0  -3   3  362.90   18.23
   0  -3  -3  313.35   12.53
   0  -3  -3  255.65   10.56
   0   3  -4 3538.05   58.71
   0   3  -4 3010.52   50.54
   0   3   4 2532.61   43.25
   0  -3   4 3626.02   60.53
   0  -3   4 3362.98   55.81
   0  -3  -4 2612.13   44.02
   0   3  -5  325.50   16.40
   0   3   5  242.39   14.02
   0   3  -5  284.78   14.41
   0   3   5  257.31   12.72
   0  -3   5  318.59   14.91
   0  -3   5  350.48   18.19
   0  -3  -5  297.80   14.04
   0  -3  -5  269.81   14.29
   0   3  -6   13.52    5.99
   0   3  -6    3.74    5.71
   0   3   6   10.71    6.39
   0   3   6   21.74    8.96
   0  -3  -6    3.79    3.53
   0  -3   6    9.03    5.22
   0  -3   6    4.75    6.55
   0  -3  -6   12.36    5.15
   0   3  -7  397.77   16.99
   0   3   7  336.61   14.90
   0   3   7  369.39   16.44
   0  -3   7  477.00   21.03
   0  -3  -7  474.43   19.62
   0  -3   7  485.22   19.85
   0  -3  -7  399.76   15.95
   0   3   8  765.98   21.49
   0   3   8  925.65   27.48
   0   3  -8  896.03   24.75
   0  -3  -8 1147.17   31.31
   0  -3   8 1136.79   30.68
   0  -3   8 1155.27   32.18
   0   3   9  400.18    6.01
   0   3   9  478.56   19.13
   0  -3   9  623.22   22.76
   0  -3   9  618.70   22.65
   0  -3  -9  629.26   20.70
   0   3  10  400.56    6.06
   0   3  10  529.14   20.21
   0  -3  10  719.45   24.93
   0  -3 -10  690.99   21.97
   0  -3  10  680.97   21.70
   0   3  11    0.83    2.40
   0   3  11    8.03    8.46
   0   3 -11    4.55    3.39
   0  -3 -11    5.32    2.99
   0  -3  11    7.39    4.69
   0  -3  11   13.48   10.30
   0   3 -12  130.98    6.71
   0   3  12  197.62   12.67
   0  -3 -12  206.17    7.12
   0  -3  12  213.03    7.66
   0  -3 -12  219.51    7.03
   0  -3  12  213.39   11.97
   0   3 -13   37.59    4.46
   0   3  13   49.30   15.36
   0  -3 -13   52.67    5.39
   0  -3  13   55.67    7.31
   0  -3 -13   56.39    5.51
   0  -3  13   62.25   10.79
   0   3  14  111.72    9.53
   0  -3  14  129.38   13.25
   0  -3  14  114.14    3.80
   0  -3 -14  114.47    4.09
   0   3  15   -3.10    8.28
   0  -3  15   -1.52    8.96
   0  -3  15    0.08    0.52
   0   3  16  159.27   14.41
   0  -3  16  185.70   12.75
   0   3  17   -5.07    7.44
   0  -3  17    8.61    8.97
   0   3  18  223.83   23.37
   0  -3  18  302.07   17.16
   0   3  19    9.97   10.35
   0  -3  19   -0.84    9.42
   0   3  20   55.49   17.27
   0  -3  20   65.40    9.56
   0   3  21   21.32   12.03
   0  -3  21    6.47   10.40
   0   3  22   18.97    7.78
   0  -3  22   23.55   13.81
   0   4   0  270.98   10.52
   0  -4   0  287.01   13.06
   0  -4   0  240.02   10.19
   0   4   1 1013.34   25.72
   0   4   1  779.86   21.67
   0   4  -1  998.97   25.48
   0   4  -1  814.20   22.92
   0  -4  -1 1024.40   26.84
   0  -4   1  987.75   25.34
   0  -4  -1  876.86   22.91
   0  -4   1  862.65   22.44
   0   4   2  208.29   11.89
   0   4  -2  245.71   12.85
   0   4  -2  212.36   13.24
   0  -4  -2  156.10   10.19
   0  -4   2  256.86   15.23
   0  -4  -2  264.02   17.05
   0  -4   2  238.27   12.43
   0  -4  -2  236.40   12.62
   0   4  -3  109.86   10.75
   0   4  -3  133.42    9.51
   0   4   3  110.69    9.92
   0  -4  -3   91.53    8.70
   0  -4   3  123.99    9.10
   0  -4  -3  130.52   11.99
   0  -4   3  122.52    8.06
   0  -4  -3  117.03    7.64
   0   4   4   20.63    9.06
   0   4  -4   16.04   10.70
   0   4  -4   28.32    9.78
   0  -4  -4   31.24    6.57
   0  -4  -4   33.37   22.98
   0  -4  -4   25.71    3.60
   0  -4   4   33.42    8.65
   0  -4   4   24.59    7.02
   0   4  -5   13.46    8.08
   0   4   5   11.19    6.02
   0   4   5    9.06   10.09
   0  -4  -5    2.80    3.67
   0  -4   5   -0.66    5.07
   0  -4   5    5.40    3.47
   0  -4  -5    1.47    4.92
   0   4   6   16.91    5.17
   0   4   6   12.60    7.14
   0   4  -6   16.55    8.39
   0  -4   6   11.90    4.42
   0  -4  -6   11.92    6.64
   0  -4   6   18.05    9.25
   0   4   7  109.47    7.56
   0   4   7  107.16   10.35
   0   4  -7  126.57    7.88
   0  -4  -7  141.09    6.24
   0  -4   7  152.22    6.93
   0  -4   7  171.38   15.63
   0   4   8  702.86   22.79
   0   4   8  813.43   27.61
   0   4  -8  819.51   28.09
   0  -4   8  983.09   30.88
   0  -4  -8 1008.18   32.68
   0  -4   8 1081.14   35.26
   0   4   9   -0.13    3.37
   0   4   9   15.31   10.50
   0   4  -9    8.57    4.56
   0  -4   9   -0.53    3.76
   0  -4  -9    4.69    3.34
   0  -4   9   12.05    7.64
   0   4  10  426.85   16.82
   0   4  10  513.24   18.64
   0  -4  10  739.13   23.84
   0  -4 -10  701.84   19.37
   0  -4  10  676.49   20.20
   0   4  11    2.59    4.01
   0   4  11   19.83   12.79
   0  -4  11   25.64   11.46
   0  -4 -11   20.45    3.28
   0  -4  11   24.69    5.04
   0   4  12    7.30    4.27
   0   4  12   18.82    7.65
   0   4 -12   11.76    7.46
   0  -4 -12   31.07    3.69
   0  -4  12   22.73   10.01
   0  -4  12   20.32   15.13
   0   4 -13   10.77    4.19
   0   4  13   14.35    8.36
   0  -4 -13   16.32    7.26
   0  -4  13   16.41    3.22
   0  -4 -13    9.61    4.91
   0  -4  13   24.91   15.10
   0   4  14   98.72   12.06
   0   4 -14   69.38    5.01
   0  -4  14  135.58   34.01
   0  -4 -14  125.50   12.66
   0   4 -15   61.90   10.64
   0   4  15   74.52   28.55
   0  -4  15  121.08   36.75
   0   4  16  344.98   16.40
   0  -4  16  442.96   21.97
   0   4  17  120.72    7.99
   0  -4  17  164.77   12.29
   0   4  18  285.92   26.52
   0  -4  18  416.53   21.86
   0   4  19    7.85    4.99
   0  -4  19   20.21   10.03
   0   4  20   74.79   10.04
   0  -4  20   76.55   27.07
   0   4  21    5.06    7.52
   0  -4  21   -9.60    9.17
   0   4  22   21.51   11.62
   0  -4  22    5.29    8.80
   0   5   0  110.36   15.99
   0  -5   0  179.30   13.60
   0   5   1   27.59    8.43
   0   5  -1   19.15   16.60
   0  -5  -1   27.41   14.73
   0  -5   1   40.18   22.25
   0   5   2  296.23   11.92
   0   5  -2  300.02   13.18
   0  -5  -2  418.01   23.16
   0  -5   2  404.77   19.20
   0   5  -3  472.08   31.21
   0   5   3  478.95   20.72
   0  -5  -3  656.65   27.06
   0  -5   3  626.09   26.10
   0   5   4   20.69    9.48
   0   5  -4   15.00    6.73
   0  -5  -4   27.22   13.23
   0  -5   4   23.58   15.11
   0   5  -5  129.07    8.88
   0   5   5  107.16   25.95
   0  -5  -5  170.16   11.57
   0  -5   5  148.41    8.93
   0   5  -6  165.52    9.01
   0   5   6  138.59   10.34
   0   5   6  149.37    9.98
   0  -5   6  218.56   28.17
   0   5  -7   11.08    5.59
   0   5   7   13.45    7.66
   0   5   7   19.89    5.54
   0  -5   7   42.69   10.77
   0   5  -8  380.74   18.44
   0   5   8  324.71   12.32
   0   5   8  307.70   11.83
   0  -5   8  479.58   15.98
   0   5   9  233.14   12.14
   0   5   9  277.62   13.87
   0   5  -9  277.35   22.14
   0  -5   9  383.94   17.79
   0   5 -10  307.82   12.24
   0   5  10  318.33   15.84
   0   5  10  241.21   10.29
   0  -5  10  469.99   23.26
   0   5 -11   34.78    6.74
   0   5  11   50.37   11.23
   0   5  11   26.87    5.79
   0  -5  11   48.04   16.89
   0   5 -12    9.67    4.66
   0   5  12   29.97   11.09
   0   5  12   23.00    5.82
   0  -5  12   26.18    8.72
   0   5 -13    1.73    3.11
   0   5  13   17.73    7.59
   0   5  13    8.71    3.97
   0  -5  13    8.59    5.54
   0   5 -14   91.85    6.30
   0   5  14   99.99   35.82
   0  -5  14  155.99   14.10
   0   5 -15  152.97    7.72
   0   5  15  216.53   12.99
   0  -5  15  274.88   29.43
   0   5  16  180.72   11.83
   0  -5  16  240.29   15.58
   0   5  17  261.61   22.84
   0  -5  17  418.03   46.64
   0   5  18  132.59   21.23
   0  -5  18  215.57   16.06
   0   5  19   74.07   16.41
   0  -5  19   77.85   27.23
   0   5  20   55.71   10.46
   0  -5  20   55.45   11.82
   0   5  21   -5.55    7.32
   0  -5  21   -8.27    8.85
   0   6   0 1485.04   47.23
   0   6  -1    5.19    8.48
   0   6   1    9.54   12.48
   0  -6  -1    7.05   10.91
   0  -6   1    9.20    8.24
   0   6   2  380.12   17.52
   0   6  -2  399.67   17.78
   0  -6  -2  561.62   22.03
   0  -6   2  504.41   32.83
   0   6   3  390.48   16.90
   0   6  -3  400.90   17.68
   0  -6  -3  561.84   21.45
   0  -6   3  515.95   19.31
   0   6  -4    1.69    7.03
   0   6   4    6.50    6.67
   0  -6  -4   16.37    7.44
   0  -6   4    4.11    7.48
   0   6  -5  228.39   13.57
   0   6   5  207.54   12.54
   0  -6  -5  300.42   20.94
   0  -6   5  274.67   13.46
   0   6  -6  155.39   11.70
   0   6   6  148.48   11.59
   0  -6  -6  226.73   24.25
   0  -6   6  235.38   18.49
   0   6  -7   30.77   11.06
   0   6   7   23.62    6.71
   0  -6  -7   49.53   15.51
   0  -6   7   57.58    9.31
   0   6   8   27.14    6.06
   0   6  -8   28.87    6.36
   0  -6   8   50.27   10.00
   0   6   9  336.72   14.48
   0   6   9  318.32   13.56
   0   6  -9  356.77   15.80
   0  -6   9  540.92   21.51
   0   6  10    3.40    5.10
   0   6  10    7.05    8.18
   0   6 -10   15.45    8.39
   0  -6  10   19.83   12.38
   0   6 -11  187.35   10.78
   0   6  11  135.75    7.82
   0  -6  11  264.11   11.86
   0   6 -12   53.51    8.46
   0   6  12   50.97    8.23
   0   6  12   47.71    7.73
   0  -6  12   71.61   20.37
   0   6  13  132.64    8.39
   0   6  13  170.34   12.85
   0   6 -13  143.07   14.76
   0  -6  13  279.54   16.73
   0   6 -14  105.04    6.74
   0   6  14  132.96   11.89
   0   6  14   83.53    5.88
   0  -6  14  183.21   13.07
   0   6 -15  135.19    8.96
   0   6  15  190.39   13.36
   0  -6  15  263.93   15.50
   0   6  16   20.20    7.04
   0  -6  16   21.86   10.65
   0   6  17  159.07   11.29
   0  -6  17  186.59   43.89
   0   6  18   43.43   11.55
   0  -6  18   43.54   18.90
   0   6  19   61.74   12.41
   0  -6  19   83.69   12.61
   0   6  20   20.62    8.29
   0  -6  20   19.41   14.93
   0   7   0  644.20   22.03
   0  -7   0  915.50   32.84
   0   7   1    5.37    6.19
   0   7  -1   -1.53    8.30
   0  -7  -1   -7.79    8.26
   0  -7   1   14.11    8.06
   0   7   2  427.69   18.25
   0   7  -2  425.87   29.38
   0  -7  -2  616.24   20.86
   0  -7   2  573.63   20.89
   0   7  -3   49.82   21.85
   0   7   3   44.20   26.02
   0  -7  -3   75.88    7.99
   0  -7   3   87.29   27.21
   0   7  -4   16.99    7.69
   0   7   4   32.80    7.79
   0  -7  -4   40.38   11.90
   0  -7   4   31.87   13.31
   0   7  -5   36.82    9.64
   0   7   5   50.17   12.06
   0  -7  -5   75.77   22.11
   0  -7   5   66.95    9.32
   0   7  -6   11.38   10.04
   0   7   6    6.03    8.05
   0  -7  -6    6.46    6.72
   0  -7   6    8.03    6.04
   0   7   7   16.33    7.48
   0   7  -7    8.62    8.50
   0  -7  -7    1.38    5.99
   0  -7   7   16.69   11.21
   0   7  -8   23.68    8.22
   0   7   8   38.17   10.09
   0  -7  -8   65.73   23.78
   0  -7   8   56.26   21.03
   0   7  -9   34.29    9.07
   0   7   9   49.13    8.48
   0  -7  -9   91.79   26.73
   0  -7   9   77.92   14.42
   0   7  10   10.63    7.34
   0   7 -10   -3.07    7.29
   0  -7 -10    9.54    8.41
   0  -7  10   10.20   10.42
   0   7  11  291.90   12.51
   0   7 -11  323.29   14.80
   0  -7  11  485.83   19.94
   0   7 -12   38.86    9.40
   0   7  12   31.99   12.11
   0   7  12   37.39    8.64
   0  -7  12   45.78   13.08
   0   7 -13  357.82   12.04
   0   7  13  405.12   16.57
   0   7  13  325.84   12.10
   0  -7  13  635.00   20.57
   0   7  14   -3.62    4.29
   0   7  14   15.03    8.31
   0   7 -14   12.30    7.55
   0  -7  14   10.18    6.40
   0   7 -15   77.29    9.20
   0   7  15   88.13   29.17
   0   7  15   75.07    7.11
   0  -7  15  143.07   37.48
   0   7  16    4.62    7.34
   0  -7  16   12.75    8.44
   0   7  17   76.54   16.30
   0  -7  17   97.00   24.40
   0   7  18    8.30    8.69
   0  -7  18    1.35    5.60
   0   7  19   40.24   11.30
   0  -7  19   50.92   13.59
   0   8   0  420.98   18.36
   0  -8   0  557.48   20.27
   0   8  -1  302.56   16.89
   0   8   1  267.87   17.20
   0  -8   1  415.61   16.45
   0  -8  -1  415.61   17.92
   0   8  -2  223.83   15.14
   0   8   2  215.72   16.31
   0  -8  -2  319.89   14.66
   0  -8   2  310.75   15.26
   0   8   3   62.95   14.03
   0   8  -3   59.55   12.89
   0  -8  -3   95.85   10.94
   0  -8   3   93.44   11.86
   0   8  -4   80.18   12.71
   0   8   4   90.04   11.88
   0  -8  -4  109.11   11.42
   0  -8   4  105.76   34.56
   0   8   5    3.78    8.97
   0   8  -5   19.33   12.77
   0  -8  -5    2.78    4.80
   0  -8   5    7.20    8.99
   0   8   6   16.42    9.40
   0   8  -6   -2.56   10.26
   0  -8  -6   10.55    6.24
   0  -8   6    8.94    7.56
   0   8   7   17.41    8.21
   0   8  -7   17.43    9.32
   0  -8  -7   33.48   19.63
   0  -8   7   46.47   15.01
   0   8   8    0.73    7.69
   0   8  -8    0.84    9.39
   0  -8  -8   -1.39    4.99
   0  -8   8    5.63   10.50
   0   8   9   32.92   10.68
   0   8  -9  -14.95   10.35
   0  -8  -9   -2.03    9.60
   0  -8   9    6.31   10.54
   0   8 -10   -0.79    8.46
   0   8  10   -0.60    6.21
   0  -8 -10    3.09    4.89
   0  -8  10   24.25   15.18
   0   8 -11   86.89   11.33
   0   8  11   96.46    9.08
   0  -8 -11  152.61   20.08
   0  -8  11  159.00   18.22
   0   8  12   -1.18    6.21
   0   8 -12    0.07    7.27
   0  -8 -12   -3.67   10.29
   0  -8  12    2.58    5.45
   0   8 -13  122.28    8.79
   0   8  13  114.24    8.64
   0  -8 -13  199.39   38.25
   0  -8  13  188.81   46.75
   0   8 -14   12.22    5.65
   0   8  14    4.68    5.06
   0  -8 -14   15.15   11.59
   0  -8  14   -0.38    8.86
   0   8 -15   80.06    9.71
   0  -8  15  100.62   29.78
   0  -8 -15  148.21   31.08
   0  -8  16   34.48   10.27
   0   8  17   51.45   12.85
   0  -8  17   57.09   10.45
   0   8  18    5.02    8.26
   0  -8  18    4.59    6.75
   0   9   0  147.06   13.24
   0  -9   0  237.56   11.69
   0   9   1  750.89   35.15
   0   9  -1  843.91   39.37
   0  -9  -1 1139.78   55.66
   0  -9   1 1165.84   52.08
   0   9  -2   59.43   15.17
   0   9   2   71.15   15.04
   0  -9  -2  108.86   26.92
   0  -9   2  102.68   26.75
   0   9  -3  101.94   14.16
   0   9   3   91.96   15.22
   0  -9   3  164.97   14.92
   0  -9  -3  144.49   14.05
   0   9  -4  114.76   13.94
   0   9   4   89.85    9.67
   0  -9   4  139.69   26.95
   0  -9  -4  121.69   14.37
   0   9  -5    6.95   11.11
   0   9   5   10.53    8.84
   0  -9  -5    9.82   10.69
   0  -9   5   30.93    9.83
   0   9  -6   36.57   12.19
   0   9   6   69.43   13.23
   0  -9  -6   79.36   31.20
   0  -9   6   73.09   18.25
   0   9  -7   17.18    6.65
   0   9   7   13.73    9.29
   0  -9  -7   36.42   20.27
   0  -9   7   18.64   13.71
   0   9  -8    4.26   10.70
   0   9   8    9.77    8.33
   0  -9  -8    5.21    8.17
   0  -9   8   12.29   10.94
   0   9  -9   14.94   10.25
   0   9   9    8.76    8.11
   0  -9  -9    6.60    8.55
   0  -9   9    1.88   11.66
   0   9  10   10.27    6.97
   0   9 -10   -4.94    8.71
   0  -9 -10    4.89    6.68
   0  -9  10  -18.66   11.69
   0   9  11    2.30    6.27
   0   9 -11   -2.33    7.80
   0  -9 -11   -3.36    9.29
   0  -9  11   19.51   11.09
   0   9 -12   -6.40    7.26
   0   9  12    0.25    6.05
   0  -9 -12  -11.40    8.75
   0  -9  12   -2.88    7.62
   0   9  13   13.43    8.23
   0  -9  13   37.20   10.03
   0  -9 -13   35.31   13.00
   0   9  14   18.62    7.96
   0   9 -14    7.76    7.78
   0  -9 -14   11.44    6.68
   0  -9  14   15.00    8.05
   0   9 -15   25.93    8.93
   0  -9  15   49.91   10.22
   0  -9 -15   38.36   18.48
   0  -9 -16   11.05    6.98
   0  -9  16    0.17   10.08
   0  -9 -17   30.69   13.53
   0  -9  17   16.80   12.25
   0  10   0    4.32    9.70
   0 -10   0   17.20    9.65
   0  10  -1  341.53   19.70
   0  10   1  349.37   18.25
   0 -10   1  509.43   26.21
   0 -10  -1  537.37   29.45
   0  10  -2   17.80   11.74
   0  10   2   38.92   15.03
   0 -10   2   29.07   19.71
   0 -10  -2   48.83   15.25
   0  10  -3   90.93   10.97
   0  10   3   98.90   16.99
   0 -10   3  117.39   34.26
   0 -10  -3  132.20   50.41
   0  10  -4   38.54   16.96
   0  10   4   43.12   10.51
   0 -10  -4   80.00   16.63
   0 -10   4   50.01   15.15
   0  10  -5   70.55   16.89
   0  10   5   41.61   13.27
   0 -10  -5   98.47   17.54
   0 -10   5   74.42    9.97
   0  10  -6   -0.15   11.58
   0  10   6   -1.01    9.33
   0 -10  -6    5.52    7.24
   0 -10   6    6.62    5.70
   0  10   7   21.21    9.74
   0  10  -7   39.76   13.71
   0 -10  -7   57.82   20.91
   0 -10   7   35.16   16.07
   0  10  -8    9.40    9.67
   0  10   8   12.79    8.74
   0 -10  -8   15.19   10.40
   0 -10   8    7.15   10.39
   0  10   9   29.53   10.14
   0  10  -9   27.96    9.85
   0 -10  -9   32.65    9.20
   0 -10   9   59.57   14.34
   0  10 -10   -1.71    8.51
   0  10  10    5.81    7.39
   0 -10 -10   -3.03    9.21
   0 -10  10    2.76   10.71
   0  10 -11   17.27    9.95
   0  10  11   11.64    7.36
   0 -10 -11    3.75    5.74
   0 -10  11   -4.94   10.67
   0  10  12    7.74    6.70
   0  10 -12   15.75    7.41
   0 -10 -12   25.53   13.27
   0 -10  12   25.43   16.29
   0  10  13    9.65    6.87
   0  10 -13   12.29    6.87
   0 -10 -13   17.74    9.27
   0 -10  13   17.24   10.77
   0  10 -14    1.83    5.99
   0  10  14    0.50    5.57
   0 -10 -14   12.05    9.65
   0 -10  14   15.49    8.99
   0 -10 -15   18.85   13.96
   0 -10  15   23.23   13.46
   0  11   0    3.90   10.72
   0 -11   0    2.47    5.73
   0  11  -1   90.21   17.38
   0  11   1   67.47   14.18
   0 -11  -1   83.08   36.49
   0 -11   1  118.15   21.98
   0  11   2    0.87    5.56
   0  11  -2   -8.12   11.37
   0 -11   2   15.50   10.69
   0 -11  -2    4.84   10.76
   0  11   3  151.01   32.89
   0  11  -3  140.48   11.74
   0 -11   3  295.15   17.10
   0 -11  -3  244.38   13.75
   0  11  -4    5.85   10.80
   0  11   4   -7.69   10.15
   0 -11  -4    6.80   11.01
   0 -11   4    1.89   10.87
   0  11  -5   94.53   16.58
   0  11   5  113.19   14.26
   0 -11  -5  176.84   61.25
   0 -11   5  199.56   25.46
   0  11   6   45.85   14.46
   0  11  -6   54.32   20.75
   0 -11  -6  103.92   14.61
   0 -11   6   59.52   17.61
   0  11  -7   18.75    9.91
   0  11   7   29.11   13.93
   0 -11  -7   22.59    9.11
   0 -11   7   20.93   16.13
   0  11   8   39.60    9.95
   0  11  -8   49.01   13.16
   0 -11  -8   72.53   25.55
   0 -11   8   67.82   11.04
   0  11   9    7.19    9.75
   0  11  -9    3.91    9.27
   0 -11  -9   -0.74    5.59
   0 -11   9    3.43    9.38
   0  11 -10    4.94    8.11
   0  11  10    9.19    8.02
   0 -11 -10   -1.24    8.53
   0 -11  10   -0.54   11.47
   0  11 -11   -3.30    7.62
   0  11  11    8.82    8.22
   0 -11 -11    9.09    5.79
   0 -11  11   11.85   10.98
   0  11  12    5.24   11.23
   0  11 -12    7.56    7.95
   0 -11 -12    0.76    8.55
   0 -11  12   15.07   10.90
   0  11  13   -4.50    5.74
   0  11 -13   10.03    7.16
   0 -11 -13   13.10   11.08
   0 -11  13    4.62    3.78
   0  12   0   -6.52   11.55
   0 -12   0   12.57    9.75
   0  12  -1   30.76   11.26
   0  12   1   20.67   11.57
   0 -12   1   45.70   13.49
   0 -12  -1   44.88   18.99
   0  12  -2   12.20   10.52
   0  12   2    7.63   11.18
   0 -12   2   32.41   14.89
   0 -12  -2   15.52   16.50
   0  12   3  102.07   16.39
   0  12  -3   87.67   14.03
   0 -12  -3  145.51   16.42
   0 -12   3  165.51   17.08
   0  12  -4   25.28   10.01
   0  12   4   25.14   10.83
   0 -12  -4   51.66   26.16
   0 -12   4   49.92   10.56
   0  12  -5  116.55   17.08
   0  12   5   89.37   10.73
   0 -12  -5  132.36   16.22
   0 -12   5   92.78   44.07
   0  12   6   23.37    9.64
   0  12  -6   30.88   14.18
   0 -12  -6   42.56   12.01
   0 -12   6   57.53   11.82
   0  12  -7   17.68    8.93
   0  12   7    9.14    8.65
   0 -12  -7   12.88    7.85
   0 -12   7   16.77   12.19
   0  12  -8   25.73   12.93
   0  12   8    9.34    9.57
   0 -12  -8   42.72   12.30
   0 -12   8   24.97   12.17
   0  12   9    2.81    9.56
   0  12  -9   13.75   10.25
   0 -12  -9    7.45    8.98
   0 -12   9   16.13   12.06
   0  12  10   -1.50    9.00
   0  12 -10   -0.42    4.77
   0 -12 -10    4.88    9.46
   0 -12  10    4.49   10.78
   0  13   0    9.21    8.62
   0 -13   0   26.29    9.66
   0  13  -1   -3.96   10.10
   0  13   1   -6.16   12.72
   0 -13   1   16.81   13.05
   0 -13  -1    1.74    5.02
   0  13   2   16.67   12.50
   0  13  -2   34.95   16.35
   0 -13   2   43.02    9.58
   0 -13  -2   22.90   14.27
   0  13   3    1.57    8.64
   0  13  -3   13.58   10.66
   0 -13  -3   11.12   10.75
   0 -13   3   14.15   10.05
   0  13  -4   26.09   11.26
   0  13   4   10.40   10.11
   0 -13   4   37.26   10.78
   0  13   5   18.70   11.68
   0  13  -5    6.49   10.27
   0 -13  -5   18.11    9.47
   0 -13   5   22.14   13.07
   0  13   6    6.30    9.58
   0  13  -6   -0.67    6.77
   0 -13  -6   -2.31    9.38
   0 -13   6   17.94   10.93
  -1   0  23    7.86    5.46
  -1   0  21   -2.86    7.16
  -1   0  20   21.94    8.46
  -1   0  19    6.32    2.55
  -1   0  18  181.02    8.84
  -1   0  17    3.65    2.43
  -1   0  16  185.28   13.51
  -1   0  15    2.03    7.22
  -1   0  14  382.17   15.76
  -1   0  13   -3.31    6.98
  -1   0  12 2577.70   69.14
  -1   0  11    2.56    6.65
   1   0 -10 1915.40   52.33
  -1   0  10 1918.38   51.83
   1   0  -9    1.21    2.50
  -1   0   9   10.47    6.37
   1   0  -9    1.33    0.66
   1   0  -9   -0.30    0.70
   1   0  -8  366.78   17.00
  -1   0   8  373.78   19.76
  -1   0   8  407.53   18.42
   1   0  -8  397.36   17.49
   1   0  -7   -4.46    4.96
  -1   0   7   -2.12    4.71
  -1   0   7    1.02    0.97
   1   0  -7   -1.90    1.42
   1   0  -6 2502.11   41.48
  -1   0   6 2555.51   42.51
  -1   0   6 2601.08   42.77
   1   0  -6 2597.35   42.36
   1   0  -5   -6.98    4.65
  -1   0   5   -3.41    6.88
  -1   0   5    2.41    3.96
   1   0  -5   -2.32    3.87
   1   0  -4 3960.93   64.92
  -1   0   4 3831.09   65.79
  -1   0   4 3894.73   63.80
   1   0  -4 3930.73   64.90
   1   0  -3   -0.20    2.06
  -1   0   3   -2.53    2.63
  -1   0   3    0.14    1.73
   1   0  -3   -4.99    3.12
  -1   0  -2  544.53   18.10
   1   0   2  522.16   19.14
  -1   0  -2  521.53   16.78
   1   0   2  519.45   17.36
   1   0   3   21.17   12.66
  -1   0  -3   20.73    9.66
  -1   0  -3    7.15    3.89
   1   0   3   13.42    5.90
  -1   0  -4  218.75   10.49
   1   0   4  213.14   11.58
  -1   0  -4  226.82    7.84
   1   0   4  211.82    8.04
  -1   0  -5   -4.64    5.03
   1   0   5   -4.29    7.99
   1   0   5   -0.55    1.21
  -1   0  -6  850.87   28.16
   1   0   6  851.24   28.92
  -1   0  -7   -1.19    5.88
   1   0   7    6.99    7.35
  -1   0  -8  796.83   21.31
   1   0   8  824.82   22.86
   1   0   9   -6.46    7.14
   1   0  10 2246.32   69.37
   1   0  11    5.15    4.65
   1   0  12  122.50   10.97
   1   0  13    9.38   12.11
   1   0  14    7.69    7.40
   1   0  15    6.04    9.12
   1   0  16    6.98    9.59
   1   0  17    6.34    9.60
   1   0  18   10.45    8.00
   1   0  19   14.91   12.29
   1   0  20  109.46   17.05
   1   0  21   -5.88    9.42
   1   0  22   98.79   22.29
  -1   1  23   21.77    9.82
  -1  -1  23   16.85    8.05
  -1   1  22   21.26   11.85
  -1  -1  22   21.33   11.17
  -1   1  21    1.07    5.02
  -1  -1  21    4.78    7.18
  -1   1  20   43.01   10.54
  -1  -1  20   31.65   14.98
  -1   1  19   31.65    6.92
  -1  -1  19   21.09    6.82
  -1   1  18   81.22   10.23
  -1  -1  18   74.90   27.25
  -1   1  17    3.95    7.10
  -1  -1  17    2.58    7.22
  -1   1  16  146.85    7.37
  -1  -1  16  173.63   10.85
  -1   1  15    2.53    5.15
  -1  -1  15    5.43    7.56
  -1   1  14    7.87    6.54
  -1  -1  14   -3.48    5.15
  -1   1  13   36.67    6.91
  -1  -1  13   43.77   15.72
  -1   1  12  917.59   26.07
  -1  -1  12  998.38   28.41
  -1   1  11  315.02   12.93
  -1  -1  11  388.53   16.01
  -1  -1  11  383.56   13.44
   1   1 -10 2237.60   59.71
   1   1 -10 2045.96   53.65
  -1   1  10 2070.65   55.71
  -1  -1  10 2339.46   62.76
  -1  -1  10 2189.14   57.38
   1  -1 -10 2201.94   57.52
   1  -1 -10 2226.32   59.38
   1  -1 -10 2040.64   53.32
   1   1  -9   52.06    3.79
  -1   1   9   44.12    6.08
   1   1  -9   55.13    6.53
   1  -1  -9   53.51    5.70
   1  -1  -9   58.51    5.76
  -1  -1   9   54.16    4.31
   1  -1  -9   42.76    5.99
  -1  -1   9   37.44   18.94
   1   1  -8  612.69   16.22
   1   1  -8  631.25   15.77
   1  -1  -8  593.09   15.80
  -1  -1   8  646.96   18.36
  -1  -1   8  618.24   15.45
   1  -1  -8  627.90   15.88
   1   1  -7   -0.69    4.98
   1   1  -7    1.53    2.91
  -1   1   7   -0.69    4.88
   1  -1  -7    7.20    4.10
   1  -1  -7    1.41    1.67
  -1  -1   7    3.93    2.10
  -1  -1   7    3.51    4.07
   1  -1  -7    7.49    2.96
   1   1  -6 2519.74   42.07
   1   1  -6 2627.62   43.07
  -1   1   6 2177.66   37.55
   1  -1  -6 2341.30   38.94
   1  -1  -6 2590.73   42.43
  -1  -1   6 2597.86   42.66
  -1  -1   6 2553.07   45.05
   1  -1  -6 1720.11   28.43
   1   1  -5  429.74   14.78
   1   1  -5  458.14   15.92
  -1   1   5  362.30   13.82
   1  -1  -5  393.94   14.06
   1  -1  -5  444.59   16.00
  -1  -1   5  453.31   18.15
  -1  -1   5  457.19   26.42
   1  -1  -5  279.42   11.33
   1   1  -4  581.76   19.76
   1   1  -4  624.11   24.70
  -1   1   4  512.77   21.41
   1  -1  -4  498.20   18.51
   1  -1  -4  592.45   25.33
  -1  -1   4  596.93   20.71
  -1  -1   4  592.58   21.04
   1  -1  -4  373.35   13.96
   1   1  -3   34.73    4.55
   1   1  -3   23.32    6.08
  -1   1   3   19.96    5.73
   1  -1  -3   22.97    6.12
   1  -1  -3   33.07    4.16
  -1  -1   3   22.75    4.54
  -1  -1   3   38.94   17.28
   1  -1  -3   17.89    3.71
  -1   1  -2  156.79    7.09
   1   1   2  173.83   10.33
   1   1   2  148.71   11.94
  -1   1  -2   88.90    6.75
  -1  -1  -2  167.22    7.64
   1  -1   2  157.73    8.01
   1  -1   2  112.22    5.74
  -1  -1  -2  133.16    9.45
  -1   1  -3  371.87   18.93
   1   1   3  359.82   22.42
  -1   1  -3  240.79   13.09
   1   1   3  387.89   17.76
  -1  -1  -3  388.79   14.70
   1  -1   3  399.61   38.68
   1  -1   3  256.24    9.67
  -1  -1  -3  302.81   12.45
   1   1   4  493.86   16.68
  -1   1  -4  484.90   17.15
  -1   1  -4  272.53   10.80
   1   1   4  417.43   21.00
  -1  -1  -4  440.27   16.58
   1  -1   4  496.55   18.07
  -1  -1  -4  500.23   16.62
  -1   1  -5  209.14    9.08
   1   1   5  204.01    7.54
   1   1   5  181.91    9.55
  -1  -1  -5  190.51    8.93
   1  -1   5  218.13    8.99
  -1  -1  -5  211.73    8.35
   1  -1   5  203.84   11.31
   1  -1   5  174.75    6.64
   1   1   6   21.84    5.00
  -1   1  -6   13.52    6.98
   1   1   6   18.61    7.05
   1  -1   6   23.79   13.31
  -1  -1  -6   22.95    8.00
  -1  -1  -6   23.50    4.04
   1  -1   6   23.78    3.50
   1  -1   6   26.87    4.47
  -1   1  -7    5.36    6.56
   1   1   7    8.14    4.65
   1   1   7    3.64    2.30
   1  -1   7    7.76    7.35
   1  -1   7    3.47    2.71
  -1  -1  -7   11.42    2.86
   1  -1   7   10.26    2.97
  -1  -1  -7    6.56    3.02
   1   1   8  493.03   19.97
   1   1   8  318.07   11.81
  -1  -1  -8  500.64   20.23
   1  -1   8  557.89   21.03
  -1  -1  -8  547.80   20.21
   1  -1   8  536.48   20.35
   1  -1   8  531.97   21.97
   1   1   9  366.81   16.13
   1  -1   9  392.20   23.78
   1  -1   9  406.62   15.05
   1   1  10  980.08   32.50
   1  -1  10 1069.97   37.31
   1   1  11    6.63    3.08
   1  -1  11    3.64    4.73
   1   1  12  179.83   13.96
   1  -1  12  178.42    9.88
   1   1  13  261.53   12.29
   1  -1  13  299.77   16.81
   1   1  14   26.19    9.95
   1  -1  14   36.26   13.66
   1   1  15  238.07   13.67
   1  -1  15  264.07   14.46
   1   1  16   -2.90    9.74
   1  -1  16    9.69    8.38
   1   1  17    3.51    8.90
   1  -1  17   14.09   11.43
   1   1  18   43.25    8.88
   1  -1  18   40.57   11.97
   1   1  19   13.10    9.20
   1  -1  19   -0.13   10.16
   1   1  20   81.54   13.50
   1  -1  20   78.59   23.39
   1   1  21    9.38    9.12
   1  -1  21    9.02    9.99
   1   1  22   96.81   14.68
   1  -1  22   82.51   24.06
  -1   2  23   11.03    8.62
  -1  -2  23   -1.53    7.18
  -1   2  22    5.16    7.90
  -1  -2  22   11.29    7.79
  -1   2  21   -0.56    8.10
  -1  -2  21    7.47    8.63
  -1   2  20   97.80   10.65
  -1  -2  20   93.99   11.12
  -1   2  19  112.44   12.14
  -1  -2  19  107.46   10.65
  -1   2  18  125.02   10.11
  -1  -2  18  150.82   11.64
  -1   2  17   24.04    6.54
  -1  -2  17   21.40    9.92
  -1   2  16  115.18    9.96
  -1  -2  16  141.19   17.22
  -1   2  15   17.08    7.39
  -1  -2  15    9.07    6.34
  -1   2  14   80.28   16.30
   1   2 -14   46.82    1.93
  -1  -2  14   84.80   23.44
  -1  -2  14   82.79    5.00
   1   2 -13   -0.21    1.37
  -1   2  13    0.82    3.70
  -1  -2  13    1.67    0.93
   1  -2 -13    1.00    0.78
   1  -2 -13    0.37    0.64
  -1  -2  13   10.62    8.96
   1   2 -12    3.10    2.60
  -1   2  12    1.75    6.50
   1  -2 -12    3.32    1.48
  -1  -2  12   -2.44    1.94
   1  -2 -12    1.70    1.26
  -1  -2  12    6.77    7.03
   1   2 -11  363.93   12.34
  -1   2  11  383.63   16.12
   1  -2 -11  448.36   14.68
  -1  -2  11  446.92   14.85
   1  -2 -11  440.23   15.49
  -1  -2  11  466.05   18.79
  -1   2  10  544.26   22.43
   1   2 -10  547.39   20.84
  -1  -2  10  641.68   34.67
   1  -2 -10  616.15   24.25
  -1  -2  10  626.17   23.48
   1  -2 -10  561.55   21.84
   1  -2 -10  574.09   22.40
   1   2  -9  857.67   32.47
  -1   2   9  727.86   29.19
   1   2  -9  775.63    6.94
  -1  -2   9  923.74   11.44
   1  -2  -9  884.09    8.17
  -1  -2   9  889.44   32.93
   1  -2  -9  752.48   28.01
   1  -2  -9  804.49   30.36
   1   2  -8 2916.26   72.07
  -1   2   8 2503.30   60.87
   1  -2  -8 2593.55   62.82
  -1  -2   8 3010.86   74.88
   1  -2  -8 3075.61   74.13
  -1  -2   8 2953.42   71.13
   1  -2  -8 2565.78   61.47
   1   2  -7 1500.07   36.97
  -1   2   7  799.12   20.75
  -1   2   7 1300.58   37.30
   1   2  -7 1385.19   33.98
  -1  -2   7 1445.03   35.42
   1  -2  -7 1291.79   31.89
  -1  -2   7 1549.73   38.53
   1   2  -6 2737.03   45.93
  -1   2   6 2123.90   35.89
   1   2  -6 2638.25   43.84
   1  -2  -6 2253.95   37.80
  -1  -2   6 2786.01   46.17
  -1  -2   6 2683.26   45.46
   1   2  -5 2647.31   44.26
  -1   2   5 1538.32   26.15
   1   2  -5 2608.72   43.30
  -1   2   5 2008.06   33.92
   1  -2  -5 2143.38   35.86
  -1  -2   5 2614.54   43.27
  -1  -2   5 2659.22   44.81
   1   2  -4 1153.92   21.14
  -1   2   4  747.74   16.40
  -1   2   4  851.54   16.93
   1   2  -4 1120.23   21.20
   1  -2  -4  870.31   16.09
  -1  -2   4 1154.22   21.37
  -1  -2   4 1149.85   21.69
  -1   2   3 2030.53   34.69
   1   2  -3 3168.09   52.26
   1   2  -3 3220.46   53.69
   1  -2  -3 2224.24   37.62
  -1  -2   3 3218.20   53.33
  -1  -2   3 3164.81   52.84
   1   2  -2 1860.42   31.99
  -1   2   2 1180.24   26.00
  -1   2   2 1907.59   32.30
   1   2  -2 1829.30   34.13
  -1  -2   2 1859.50   33.40
  -1  -2   2 1945.15   34.80
   1  -2  -2 1921.06   39.20
  -1   2   1   43.02   15.67
   1   2  -1   47.24   18.54
   1   2  -1   53.41   12.78
  -1   2   1   49.52   11.91
  -1  -2   1   55.06   15.93
   1  -2  -1   78.14   12.19
   1  -2  -1   33.48    6.80
  -1  -2   1   64.03   10.17
   1   2   0  381.54   20.96
  -1   2   0  329.70   19.14
   1  -2   0  366.34   18.22
  -1  -2   0  255.01   13.05
  -1  -2   0  343.06   14.71
  -1  -2   0  370.51   15.44
   1  -2   0  263.42   13.10
  -1   2  -1  109.23   12.22
  -1   2  -1  118.82   16.47
   1   2   1  146.59   19.98
   1   2   1  146.64   17.44
   1  -2   1  113.92   10.39
  -1  -2  -1   79.54   30.35
   1  -2   1   80.81    9.63
  -1  -2  -1  114.51   10.39
   1   2   2 5233.08   85.83
  -1   2  -2 5157.79   84.29
   1   2   2 3940.01   65.55
  -1  -2  -2 4133.25   68.14
  -1  -2  -2 5510.64   89.79
   1  -2   2 5370.22   88.15
   1   2   3 3016.09   53.35
  -1   2  -3 3101.14   51.47
   1   2   3 2453.48   42.94
   1  -2   3 3063.99   51.06
  -1  -2  -3 2450.02   41.60
  -1  -2  -3 3254.70   53.51
  -1   2  -4   19.67    9.81
   1   2   4    6.67    8.35
  -1   2  -4   13.91    9.23
   1   2   4   19.65    9.88
  -1  -2  -4   19.69    4.77
   1  -2   4   13.26    6.38
   1  -2   4   11.89    3.35
  -1  -2  -4   21.06    7.50
  -1   2  -5  248.86   10.08
   1   2   5  223.88    8.56
  -1   2  -5  171.37    7.54
   1   2   5  199.35   11.78
  -1  -2  -5  260.49    9.33
   1  -2   5  214.14    8.88
   1  -2   5  248.46   11.58
  -1  -2  -5  202.52    8.37
  -1   2  -6  411.19   19.80
   1   2   6  376.05   17.43
  -1   2  -6  273.58   13.39
   1   2   6  346.56   18.48
  -1  -2  -6  450.72   20.21
   1  -2   6  377.45   17.16
   1  -2   6  425.71   23.49
  -1  -2  -6  357.73   16.82
   1   2   7    1.82    3.56
  -1   2  -7    5.78    2.94
   1   2   7    7.82    7.33
  -1  -2  -7    7.73    4.58
   1  -2   7    6.14    2.99
   1  -2   7   12.57    7.42
  -1  -2  -7    7.60    3.63
  -1   2  -8  357.17   13.94
   1   2   8  557.54   23.30
   1  -2   8  647.29   26.12
   1  -2   8  609.14   23.49
  -1  -2  -8  642.61   24.88
   1   2   9  170.69    6.94
   1   2   9  213.16   12.66
   1  -2   9  256.08   12.51
   1  -2   9  240.17    7.23
  -1  -2  -9  260.02    7.85
   1   2  10 1193.08   36.06
   1   2  10 1815.34   56.78
   1  -2  10 2229.20   67.36
  -1  -2 -10 2137.95   64.53
   1  -2  10 2126.08   64.13
   1  -2  10 2214.41   68.47
   1   2  11   -3.24    8.29
   1  -2  11    7.51    7.57
   1  -2  11    1.51    1.45
  -1  -2 -11    0.08    0.65
  -1  -2 -11   -1.63    0.98
   1  -2  11   -1.16    1.24
   1   2  12  819.40   30.31
   1  -2  12  933.85   33.37
   1  -2  12  890.57   28.08
   1   2  13  173.58   13.36
   1  -2  13  229.35   14.51
   1   2  14   51.31   15.63
   1  -2  14   65.36   19.83
   1   2  15   53.26   12.21
   1  -2  15   54.72    9.84
   1   2  16   20.36    9.10
   1  -2  16    5.83    9.95
   1   2  17    6.54    6.94
   1  -2  17   -2.34    9.78
   1   2  18   28.09   11.68
   1  -2  18    5.50    9.23
   1   2  19   -3.15    8.29
   1  -2  19    4.63    7.84
   1   2  20   25.70    8.85
   1  -2  20   44.12   14.04
   1   2  21   34.69   10.09
   1  -2  21   37.04   10.11
   1   2  22   32.53    9.35
   1  -2  22   24.28   10.19
  -1   3  22   34.84    7.68
  -1  -3  22   34.33   11.49
  -1   3  21    0.08    8.34
  -1  -3  21    5.81    8.66
  -1   3  20  174.82   11.12
  -1  -3  20  219.77   12.46
  -1   3  19    0.56    6.67
  -1  -3  19   -2.92    7.14
  -1   3  18  282.63   14.23
  -1  -3  18  359.53   13.48
  -1   3  17    4.31    2.43
  -1  -3  17    5.46    5.41
  -1   3  16   90.98    6.58
  -1  -3  16  138.12   13.89
  -1   3  15   17.91   12.78
   1   3 -15   10.70    3.22
  -1  -3  15   28.80   10.38
   1  -3 -15   24.29    4.21
   1   3 -14   65.66    4.78
  -1   3  14   79.11    9.13
   1  -3 -14   92.39    4.16
  -1  -3  14   81.71    3.69
   1  -3 -14   93.72    3.15
  -1  -3  14  103.97   28.93
   1   3 -13    4.18    4.06
  -1   3  13   -1.66    6.79
   1  -3 -13    1.67    2.44
  -1  -3  13    0.13    1.53
   1  -3 -13   -0.36    1.54
  -1  -3  13    6.14    5.12
   1   3 -12    3.20    3.31
  -1   3  12    3.32    6.63
   1  -3 -12    1.36    1.70
  -1  -3  12   -2.61    2.84
   1  -3 -12    3.89    2.94
  -1  -3  12    1.53    5.09
   1   3 -11  149.27    7.99
  -1   3  11  150.17    8.87
   1  -3 -11  193.22    9.42
  -1  -3  11  188.93    9.08
   1  -3 -11  171.25    7.83
  -1  -3  11  185.66   12.65
   1   3 -10  557.85    8.34
  -1   3  10  531.78   19.06
  -1  -3  10  725.15   24.80
  -1  -3  10  644.09    7.04
   1  -3 -10  665.36    7.43
   1  -3 -10  606.47   19.17
   1   3  -9  460.98   18.65
  -1   3   9  278.27   11.41
  -1   3   9  390.41   17.61
  -1  -3   9  523.43   20.25
   1  -3  -9  434.22   16.71
  -1  -3   9  563.36   23.11
   1  -3  -9  449.39   18.08
  -1   3   8  529.54   22.85
  -1   3   8  366.62   15.10
   1   3  -8  580.09   25.21
  -1  -3   8  660.35   24.90
  -1  -3   8  674.46   28.04
   1  -3  -8  559.76   21.60
   1  -3  -8  533.21   20.78
   1   3  -7  532.88   24.85
  -1   3   7  431.74   10.82
  -1   3   7  321.37   15.46
   1   3  -7  503.15   15.06
  -1  -3   7  551.55    6.64
  -1  -3   7  538.32   24.82
   1  -3  -7  473.80    6.72
   1  -3  -7  444.47   20.47
   1   3  -6  426.91   20.21
   1   3  -6  432.68   20.63
  -1   3   6  301.09   15.72
  -1   3   6  335.24   16.81
  -1  -3   6  472.25   21.51
   1  -3  -6  367.45   16.93
  -1  -3   6  435.40   20.64
   1  -3  -6  360.53   17.54
   1   3  -5 1071.36   27.09
  -1   3   5  764.90   20.16
  -1   3   5  681.10   18.83
   1  -3  -5  797.86   20.59
  -1  -3   5 1076.08   27.72
  -1  -3   5 1088.86   28.07
   1   3  -4  168.92   10.24
  -1   3   4  120.27    8.76
   1  -3  -4  156.33   20.06
  -1  -3   4  168.97    7.99
   1  -3  -4  127.70    8.00
   1  -3  -4  152.42    7.09
  -1  -3   4  172.61    9.13
   1   3  -3 3743.59   61.81
   1  -3  -3 3937.18   68.16
  -1  -3   3 3735.47   62.19
   1  -3  -3 2475.50   41.59
  -1  -3   3 3530.28   58.39
   1   3  -2   62.59   14.77
  -1   3   2   61.23   11.55
   1   3  -2   55.93   22.57
  -1   3   2   39.84    7.95
   1  -3  -2   37.12   18.07
  -1  -3   2   54.52    6.89
  -1  -3   2   54.79    6.78
   1  -3  -2   53.93    4.80
   1   3  -1 2137.25   37.83
  -1  -3   1 2205.18   37.78
   1  -3  -1 2207.10   37.80
  -1  -3   1 2031.09   34.73
  -1   3   0 1876.04   32.11
   1   3   0 2064.40   35.10
  -1  -3   0 1981.03   38.58
   1  -3   0 1917.20   32.68
  -1  -3   0 1887.51   32.07
  -1   3  -1  185.72    9.21
   1   3   1  185.51   11.68
  -1   3  -1  119.34   10.09
  -1  -3  -1  200.15   11.10
  -1  -3  -1  176.05    7.52
  -1  -3  -1  125.32    7.94
   1  -3   1  173.98    9.89
   1  -3   1  151.23    8.11
  -1   3  -2  119.19    5.83
   1   3   2   93.06   10.28
  -1   3  -2   86.18    8.87
   1   3   2  109.84   10.00
  -1  -3  -2  134.87    7.73
   1  -3   2  112.86    6.66
   1  -3   2   93.94    7.07
  -1  -3  -2   90.59    5.46
  -1   3  -3  195.55    8.65
   1   3   3  122.63   10.26
  -1   3  -3  115.28    7.13
   1   3   3  160.05    9.30
  -1  -3  -3  178.67    8.99
   1  -3   3  191.00    9.60
   1  -3   3  147.48    7.65
  -1  -3  -3  141.54    8.26
  -1   3  -4    9.70    4.48
   1   3   4    4.00    6.66
  -1   3  -4   -0.85    4.59
   1   3   4    4.67    4.59
  -1  -3  -4    8.11    5.16
   1  -3   4    3.23    6.31
   1  -3   4    7.31    3.74
  -1  -3  -4    4.38    4.49
  -1   3  -5  178.26    9.61
   1   3   5  162.35    9.55
  -1   3  -5  123.16    9.22
   1   3   5  138.61   11.48
  -1  -3  -5  178.23   10.73
   1  -3   5  157.20    8.29
   1  -3   5  177.21   12.18
  -1  -3  -5  131.00    8.20
  -1   3  -6 1489.55   36.85
   1   3   6 1788.20   44.97
   1   3   6 1793.05   44.04
   1  -3   6 1951.47   47.35
  -1  -3  -6 2263.93   54.69
  -1  -3  -6 1778.48   44.20
  -1   3  -7    7.65    4.37
   1   3   7   10.02    7.35
   1   3   7    4.78    9.11
   1  -3   7   11.04    5.37
  -1  -3  -7   20.02    6.75
   1  -3   7   18.62   11.73
  -1   3  -8 1742.27   47.03
   1   3   8 2231.49   60.45
   1   3   8 2017.57   54.08
   1  -3   8 2593.95   68.49
  -1  -3  -8 2727.88   72.15
   1  -3   8 2780.42   76.84
  -1   3  -9   31.44    5.93
   1   3   9   35.08   18.48
   1   3   9   31.45    4.43
   1  -3   9   37.40    6.25
  -1  -3  -9   31.45    8.46
   1  -3   9   45.75   16.61
  -1   3 -10  650.25   18.23
   1   3  10  941.32   28.29
   1   3  10  728.68   19.75
   1  -3  10 1109.42   29.58
  -1  -3 -10 1135.77   31.27
   1  -3  10 1169.64   33.37
  -1   3 -11   11.03    4.56
   1   3  11    9.25   11.44
   1   3  11   11.77    2.88
   1  -3  11   14.72    4.02
  -1  -3 -11   13.97    5.77
   1  -3  11   23.82    8.86
   1   3  12  618.23   20.15
   1   3  12  994.61   42.73
   1  -3  12 1223.58   39.07
  -1  -3 -12 1168.32   37.40
   1  -3  12 1153.66   36.70
   1  -3  12 1239.91   54.10
   1   3  13  -14.19    9.19
   1  -3  13   -1.94    8.43
   1  -3  13    1.72    1.56
  -1  -3 -13   -0.43    0.96
  -1  -3 -13   -1.32    1.30
   1  -3  13    2.03    1.62
   1   3  14  169.31   14.51
   1  -3  14  231.45   24.51
   1  -3  14  200.67    3.55
   1   3  15   14.39    9.18
   1  -3  15    4.86    8.88
   1   3  16   -6.87    8.80
   1  -3  16    2.84    4.57
   1   3  17   16.81   12.81
   1  -3  17    6.73    6.12
   1   3  18   15.86   10.17
   1  -3  18   25.22   15.11
   1   3  19    2.93    8.05
   1  -3  19   14.22   10.45
   1   3  20    3.73    5.44
   1  -3  20   21.78   11.24
   1   3  21   43.45   15.60
   1  -3  21   59.17   10.71
  -1   4  22   38.79    6.74
  -1  -4  22   27.88   11.11
  -1   4  21    7.70    8.32
  -1  -4  21    6.20    9.46
  -1   4  20  223.50   12.02
  -1  -4  20  285.85   19.00
  -1   4  19   51.39   11.73
  -1  -4  19   77.35   13.45
  -1   4  18  250.81   12.58
  -1  -4  18  293.44   20.49
  -1   4  17   29.39    9.74
  -1   4  16  208.53   18.62
  -1  -4  16  260.87   14.23
  -1   4  15   30.70    9.53
   1   4 -15   24.90    5.07
  -1  -4  15   39.32    9.57
   1  -4 -15   30.63   10.74
   1   4 -14   38.43   13.54
  -1   4  14   54.35    9.75
  -1  -4  14   63.73   19.10
  -1  -4  14   44.66    7.33
   1  -4 -14   54.75   10.51
   1   4 -13   28.58    4.43
  -1   4  13   37.25    9.78
   1  -4 -13   42.56    7.35
  -1  -4  13   30.72    9.11
   1  -4 -13   25.84   10.20
  -1  -4  13   51.66   12.82
   1   4 -12    7.85    3.94
  -1   4  12   18.43    6.62
   1  -4 -12    9.10    6.06
  -1  -4  12   21.64    4.91
   1  -4 -12   14.71    7.87
  -1  -4  12   16.95   10.61
  -1   4  11   22.06    5.76
  -1   4  11   34.99    8.87
   1   4 -11   37.32    6.04
   1  -4 -11   33.43    4.46
  -1  -4  11   33.13   10.06
  -1  -4  11   39.07   20.79
  -1   4  10   -1.76    3.16
  -1   4  10    1.34    5.76
   1   4 -10    4.75    4.40
  -1  -4  10    4.79    3.86
   1  -4 -10    5.12    3.09
  -1  -4  10    2.31    5.93
  -1   4   9    6.30    6.00
  -1   4   9    5.39    6.37
   1   4  -9    8.76    4.48
   1  -4  -9    6.65    6.12
  -1  -4   9    6.92    3.98
  -1  -4   9   11.91    4.67
   1   4  -8  804.41   25.89
  -1   4   8  590.58   20.16
  -1  -4   8  938.54   29.69
   1  -4  -8  779.15   24.62
  -1  -4   8  990.15   32.14
  -1   4   7    9.50    6.69
  -1   4   7    0.15    3.51
   1   4  -7   -1.48    5.79
  -1  -4   7    3.14    4.48
  -1  -4   7   11.96    6.55
   1  -4  -7    0.50    3.68
   1  -4  -7    7.60    5.18
  -1   4   6   58.38   20.85
  -1   4   6   56.88   18.12
   1   4  -6   61.51    5.85
  -1  -4   6   69.25    6.71
  -1  -4   6   74.80    7.04
   1  -4  -6   56.57    4.69
   1  -4  -6   53.59    5.60
  -1   4   5  319.91   16.83
   1   4  -5  434.05   20.96
   1   4  -5  422.96   21.21
   1  -4  -5  327.66   16.20
   1  -4  -5  515.38   24.28
   1  -4  -5  394.43   18.50
  -1  -4   5  442.67   21.74
  -1  -4   5  468.55   24.09
   1   4  -4    7.73    8.33
   1   4  -4   11.16    7.20
  -1   4   4   11.14    6.93
   1  -4  -4    4.99    4.50
  -1  -4   4    6.26    7.39
   1  -4  -4   17.59    9.67
   1  -4  -4    9.45    6.89
  -1  -4   4   13.24    7.03
  -1   4   3 1153.92   30.07
   1   4  -3 1681.60   41.62
   1  -4  -3 1736.30   48.88
   1  -4  -3 1087.66   27.47
  -1  -4   3 1747.00   43.64
   1  -4  -3 1328.00   33.44
  -1  -4   3 1568.69   38.80
  -1   4   2   94.72    7.69
   1   4  -2   80.02    5.78
   1   4  -2   62.40    7.52
   1  -4  -2   83.06   14.95
  -1  -4   2   74.19    5.76
  -1  -4   2   93.32    8.58
   1  -4  -2   55.06    4.75
  -1   4   1  962.00   24.59
   1   4  -1  980.80   25.10
  -1  -4   1  973.64   25.58
   1  -4  -1  997.87   26.57
  -1  -4   1  905.32   23.45
   1  -4  -1  766.97   20.31
   1   4   0  107.50    8.01
  -1   4   0  119.97    8.38
  -1   4   0   85.99   10.28
  -1  -4   0  124.71    7.35
  -1  -4   0  132.12   17.44
   1  -4   0   97.77    6.81
   1  -4   0  134.14   11.81
  -1   4  -1  110.95    6.81
   1   4   1  107.58    9.98
  -1   4  -1   83.30   10.17
  -1  -4  -1  118.70   10.15
  -1  -4  -1  116.57    7.32
  -1  -4  -1   80.01    7.66
   1  -4   1  119.46    8.58
   1  -4   1  100.46    7.78
   1   4   2  124.83    9.52
  -1   4  -2  154.35    9.33
  -1   4  -2  107.02    8.99
  -1  -4  -2   98.94    8.41
  -1  -4  -2  148.25    9.68
  -1  -4  -2  169.80   12.63
   1  -4   2  113.62    8.26
   1  -4   2  140.42   10.77
   1   4   3  166.98   13.30
  -1   4  -3  175.02   10.77
   1   4   3  213.89   12.74
  -1  -4  -3  220.18   11.74
   1  -4   3  256.15   17.03
   1  -4   3  193.79   10.60
  -1  -4  -3  162.98    9.39
   1   4   4  705.65   19.93
  -1   4  -4  589.59   17.65
   1   4   4  580.17   16.68
  -1  -4  -4  814.53   21.10
   1  -4   4  716.33   19.21
   1  -4   4  733.98   35.40
  -1  -4  -4  604.72   18.17
  -1   4  -5  129.17    8.93
   1   4   5  128.39   10.42
   1   4   5  168.17    9.31
   1  -4   5  165.35    8.13
  -1  -4  -5  192.64    7.51
   1  -4   5  223.38   11.16
  -1   4  -6  977.84   28.03
   1   4   6 1042.71   30.18
   1   4   6 1128.12   31.78
   1  -4   6 1225.40   33.46
  -1  -4  -6 1338.01   36.16
   1  -4   6 1401.46   38.79
  -1   4  -7  206.36    9.52
   1   4   7  234.25   13.46
   1   4   7  243.93   10.84
   1  -4   7  257.18    9.40
  -1  -4  -7  289.36   11.53
   1  -4   7  310.74   15.89
  -1   4  -8 1318.55   41.09
   1   4   8 1546.69   49.23
   1   4   8 1524.18   46.95
   1  -4   8 1846.88   56.56
  -1  -4  -8 2003.43   61.23
   1  -4   8 2093.03   65.36
  -1   4  -9   -1.14    4.05
   1   4   9    2.54    8.46
   1   4   9    2.59    3.13
   1  -4   9    7.43    5.52
  -1  -4  -9   -0.86    3.14
   1  -4   9    8.05    5.65
  -1   4 -10  642.68   22.38
   1   4  10  782.72   29.02
   1   4  10  649.81   21.92
   1  -4  10  907.75   29.84
  -1  -4 -10 1000.70   32.86
   1  -4  10 1031.05   35.33
   1   4  11    1.39    2.09
   1   4  11    6.34    9.37
  -1   4 -11    0.68    3.76
   1  -4  11    0.12    2.08
  -1  -4 -11    2.64    2.54
   1  -4  11  -11.32    7.61
   1   4  12  328.87   11.37
   1   4  12  433.80   17.00
  -1   4 -12  299.39   10.61
   1  -4  12  518.08   19.71
  -1  -4 -12  525.54   15.94
   1  -4  12  579.27   23.68
  -1   4 -13  100.15    5.09
   1   4  13  152.73   11.73
   1   4  13   99.76    5.15
   1  -4  13  193.05   13.93
   1  -4  13  165.00    7.70
   1   4  14  248.89   15.32
   1  -4  14  325.77   14.41
   1  -4  14  327.48   13.43
  -1  -4 -14  311.67   10.55
   1   4  15   51.10   13.91
   1  -4  15   86.87   17.49
   1  -4  15   48.19    7.21
   1   4  16   35.22   14.37
   1  -4  16   57.41   21.11
   1   4  17    4.38    7.11
   1  -4  17    4.32    5.60
   1   4  18   10.55    6.78
   1  -4  18   13.11    7.11
   1   4  19   16.42    8.34
   1  -4  19   13.73    7.88
   1   4  20   15.50    9.32
   1  -4  20   -1.20   10.77
   1   4  21   -7.51    8.33
   1  -4  21   14.92    9.32
  -1  -5  21   47.91   19.89
  -1   5  20  121.59   11.48
  -1  -5  20  138.89   35.97
  -1   5  19  112.01    9.77
  -1  -5  19  143.34   12.14
  -1   5  18  183.85   11.82
  -1  -5  18  242.28   28.07
  -1   5  17   71.80   10.03
  -1  -5  17  104.56   13.09
  -1   5  16  149.52   10.39
  -1  -5  16  204.41   13.20
  -1   5  15   -5.69    6.27
   1   5 -15   -0.44    3.56
  -1  -5  15   -1.31    9.28
   1  -5 -15   -0.58    2.86
  -1   5  14   29.19    8.87
   1   5 -14   29.42    5.08
  -1  -5  14   57.31   14.35
   1  -5 -14   29.87   12.32
   1   5 -13    6.49    4.45
  -1   5  13   16.52    9.71
  -1  -5  13   18.80    9.58
   1   5 -12    0.81    3.40
  -1   5  12   10.26    7.05
  -1   5  12    4.54    5.58
  -1  -5  12   -0.48    9.80
   1   5 -11   41.20    6.34
  -1   5  11   34.41    6.71
  -1   5  11   38.68    7.55
  -1  -5  11   49.32    7.76
   1   5 -10    7.95    5.34
  -1   5  10    7.44    6.08
  -1   5  10    6.41    6.13
  -1  -5  10   -2.85    8.45
   1   5  -9   14.73   11.58
  -1   5   9   22.73    8.91
  -1   5   9    3.71    4.87
  -1  -5   9   32.13    6.43
   1   5  -8   66.31   21.71
  -1   5   8   56.57   15.13
  -1   5   8   41.31    6.58
  -1  -5   8   98.85   29.26
   1   5  -7  603.53   20.97
  -1   5   7  446.25   19.49
   1  -5  -7  779.13   25.93
  -1  -5   7  754.40   25.65
   1   5  -6    1.22    6.65
  -1   5   6   -1.50    6.29
   1  -5  -6    3.32    5.34
  -1  -5   6    4.37    7.40
   1   5  -5   35.27    6.22
  -1   5   5   33.37   20.72
   1  -5  -5   30.98    5.59
  -1  -5   5   53.33   21.93
   1   5  -4   -3.36    8.17
  -1   5   4    8.92    7.07
   1  -5  -4   20.52   10.51
  -1  -5   4   19.88    8.17
   1   5  -3   11.37    8.73
  -1   5   3   17.69    7.31
   1  -5  -3   19.35    6.51
  -1  -5   3   27.12   10.85
   1   5  -2  183.98   10.22
  -1   5   2  157.69   11.66
   1  -5  -2  185.53   11.73
  -1  -5   2  219.61   12.28
   1   5  -1  347.90   19.38
   1  -5  -1  390.87   20.74
  -1  -5   1  422.62   21.70
   1   5   0  143.93   12.55
  -1   5   0  113.79   12.84
  -1  -5   0  155.35   15.26
   1  -5   0  160.21   13.11
   1   5   1  218.99   12.76
  -1   5  -1  207.83   12.77
  -1  -5  -1  301.54   19.28
   1  -5   1  286.47   25.32
   1   5   2  217.49   12.06
  -1   5  -2  205.74   13.36
  -1  -5  -2  314.48   14.56
   1  -5   2  329.29   15.03
   1   5   3  402.31   17.88
  -1   5  -3  343.09   17.07
  -1  -5  -3  540.87   23.42
   1  -5   3  480.81   21.63
   1   5   4  352.74   16.40
  -1   5  -4  311.13   15.12
  -1  -5  -4  445.83   19.13
   1  -5   4  431.64   19.91
   1   5   5 1226.28   41.39
   1   5   5 1039.04   33.97
  -1   5  -5 1097.76   35.21
   1  -5   5 1575.42   49.70
   1   5   6  518.65   10.30
   1   5   6  437.50   17.64
  -1   5  -6  435.71    9.78
   1  -5   6  628.17   24.27
   1   5   7  396.41   16.53
   1   5   7  359.09   15.69
  -1   5  -7  339.24   13.66
   1  -5   7  492.41   20.64
   1   5   8  761.04   21.77
   1   5   8  740.89   23.60
  -1   5  -8  688.56   21.33
   1  -5   8 1066.04   35.51
  -1   5  -9   36.82   15.60
   1   5   9   30.91    8.69
   1   5   9   32.10    5.69
   1  -5   9   71.78   23.89
  -1   5 -10  323.91   13.04
   1   5  10  368.25   18.12
   1   5  10  312.69   12.80
   1  -5  10  481.13   17.52
   1   5  11   59.82    7.06
   1   5  11   61.19   13.18
  -1   5 -11   46.48    6.82
   1  -5  11   80.20   25.43
   1   5  12  286.96   12.59
   1   5  12  369.81   17.92
  -1   5 -12  276.65   11.07
   1  -5  12  508.33   28.32
   1   5  13  138.04    7.21
   1   5  13  185.57   10.67
  -1   5 -13  151.72    7.05
   1  -5  13  293.76   13.69
   1   5  14  148.06    5.56
   1   5  14  227.77   16.54
  -1   5 -14  140.66   12.86
   1  -5  14  318.19   17.08
   1   5  15  226.11   14.20
   1  -5  15  257.50   14.49
   1  -5  15  267.79    8.53
   1   5  16   24.36   12.65
   1  -5  16   22.59   10.03
   1   5  17    5.86    8.76
   1  -5  17    8.44    7.69
   1   5  18   13.34   11.07
   1  -5  18   16.94   10.31
   1   5  19    3.70    8.60
   1  -5  19    6.79    6.03
   1   5  20    7.35    9.10
   1  -5  20   10.54   14.73
  -1   6  21   52.89    9.05
  -1  -6  21   51.59   21.03
  -1   6  20   11.78    7.24
  -1  -6  20   31.50   14.54
  -1   6  19   70.64   10.91
  -1  -6  19   82.33   30.70
  -1   6  18   78.46   10.56
  -1  -6  18   84.97   24.40
  -1   6  17   38.08   10.34
  -1  -6  17   53.09   16.84
  -1   6  16   62.74    7.77
  -1  -6  16   95.34   17.19
  -1   6  15   42.50    8.96
   1   6 -15   38.10    6.41
  -1  -6  15   62.02   16.26
   1  -6 -15   48.10    9.20
   1   6 -14   -0.60    4.42
  -1   6  14   14.53    9.73
  -1  -6  14   14.00    6.89
   1   6 -13   31.48    7.59
  -1   6  13   49.89   10.55
  -1   6  13   28.87    7.22
  -1  -6  13   42.92   13.31
   1   6 -12   19.63    6.46
  -1   6  12   22.34   11.03
  -1   6  12   21.67    5.31
  -1  -6  12   34.90    9.29
   1   6 -11   30.37   13.69
  -1   6  11   18.24    7.05
  -1   6  11    2.92    5.24
  -1  -6  11   16.71   10.44
   1   6 -10  168.48   11.67
  -1   6  10  128.32    8.20
  -1   6  10  133.74   10.40
  -1  -6  10  229.58   23.99
   1   6  -9   70.25    9.67
  -1   6   9   56.94   20.28
   1  -6  -9  108.66   20.46
  -1  -6   9   99.73   29.23
   1   6  -8   37.09    8.86
  -1   6   8   42.41    8.55
   1  -6  -8   69.45   21.83
  -1  -6   8   51.68   13.66
   1   6  -7  331.88   18.08
  -1   6   7  258.81   12.52
   1  -6  -7  461.23   11.75
  -1  -6   7  410.35   19.43
   1   6  -6   19.76    7.02
  -1   6   6   11.74    7.58
   1  -6  -6   20.96   11.47
  -1  -6   6   13.43    8.71
   1   6  -5  191.18   11.41
  -1   6   5  146.51   10.50
   1  -6  -5  238.32   10.47
  -1  -6   5  214.25   10.50
   1   6  -4  402.17   17.63
  -1   6   4  336.38   15.51
   1  -6  -4  510.77   19.31
  -1  -6   4  489.36   19.88
   1   6  -3   15.51    8.48
  -1   6   3   32.46    8.36
   1  -6  -3   23.95   11.21
  -1  -6   3   26.53   13.40
   1   6  -2  215.44   13.90
  -1   6   2  160.55   12.31
   1  -6  -2  254.35   13.26
  -1  -6   2  243.45   34.23
   1   6  -1   61.10    7.92
  -1   6   1   29.16    8.55
   1  -6  -1   88.36    9.30
  -1  -6   1   69.24    8.01
   1   6   0    4.69    8.36
  -1   6   0   10.52    8.27
  -1  -6   0   -6.39    8.43
   1  -6   0    6.68    7.94
   1   6   1   59.44    7.79
  -1   6  -1   47.51   10.88
  -1  -6  -1   81.35   28.41
   1  -6   1   75.53   30.57
   1   6   2   65.30   29.55
  -1   6  -2   63.14    8.51
  -1  -6  -2   96.76   10.33
   1  -6   2   93.78   19.05
   1   6   3    7.71    7.49
  -1   6  -3    4.72    7.80
  -1  -6  -3   -0.12    8.26
   1  -6   3    6.56    8.33
   1   6   4    2.78    7.80
  -1   6  -4    3.88    6.50
  -1  -6  -4   12.56    7.12
   1  -6   4   11.52    6.07
   1   6   5  436.36   17.23
  -1   6  -5  399.08   15.28
  -1  -6  -5  619.55   29.27
   1  -6   5  556.01   36.86
   1   6   6   24.81    9.84
  -1   6  -6   14.01   11.23
  -1  -6  -6   16.67    8.06
   1  -6   6   16.97   12.57
   1   6   7  787.89   27.85
   1   6   7  692.84   29.68
  -1   6  -7  716.12   25.23
   1  -6   7 1085.10   38.13
   1   6   8  196.33    9.83
   1   6   8  184.77   13.09
  -1   6  -8  186.07   12.55
   1  -6   8  269.89   13.85
   1   6   9  295.59   11.74
   1   6   9  320.85   24.25
  -1   6  -9  271.77   13.00
   1  -6   9  478.45   19.14
  -1   6 -10  250.50   11.92
   1   6  10  253.37   14.00
   1  -6  10  381.01   16.05
   1   6  11  219.14   11.97
   1   6  11  241.02   15.17
  -1   6 -11  208.78   15.06
   1  -6  11  332.80   18.36
   1   6  12  282.72   12.08
   1   6  12  362.10   18.08
  -1   6 -12  298.24   12.74
   1  -6  12  520.56   21.21
  -1   6 -13  227.79   10.75
   1   6  13  276.56   16.27
   1   6  13  202.00    9.63
   1  -6  13  381.73   18.93
  -1   6 -14   28.82    7.21
   1   6  14   29.23    9.09
   1   6  14   23.72    6.39
   1  -6  14   47.24   18.47
   1   6  15  107.82   13.61
   1  -6  15  106.69   37.65
   1   6  16   -0.95    9.22
   1  -6  16    5.53    6.95
   1   6  17   27.35   12.19
   1  -6  17   26.99    8.25
   1   6  18    2.98    6.84
   1  -6  18    5.73    5.44
   1   6  19   -0.07    9.63
   1  -6  19    0.73    5.04
   1   6  20    2.58    4.52
   1  -6  20    7.61    6.95
  -1   7  20    5.96    6.33
  -1  -7  20   12.30    7.44
  -1   7  19   32.00    7.75
  -1  -7  19   34.85   12.87
  -1   7  18   -0.77    7.55
  -1  -7  18    5.44   10.65
  -1   7  17   16.97    7.05
  -1  -7  17   53.49   16.38
  -1   7  16   27.44    7.21
  -1  -7  16   60.12   19.99
  -1   7  15   71.46   10.15
   1   7 -15   69.38    6.86
  -1  -7  15  110.09   15.96
   1  -7 -15   90.34   17.01
   1   7 -14    3.62    4.55
  -1   7  14    0.63    6.42
  -1   7  14    4.23    4.56
  -1  -7  14    8.57    8.46
   1   7 -13  105.45   11.66
  -1   7  13   77.98    7.84
   1  -7 -13  161.00   10.03
  -1  -7  13  135.82   39.93
  -1   7  12   67.51    7.86
   1   7 -12   77.07   11.09
   1  -7 -12  114.66   12.50
  -1  -7  12  120.97   34.26
   1   7 -11    8.32    7.41
  -1   7  11    1.15    5.66
   1  -7 -11    6.33    9.23
  -1  -7  11   14.29    8.82
   1   7 -10  246.80   12.66
  -1   7  10  172.16   10.85
   1  -7 -10  322.15   38.98
  -1  -7  10  313.92   18.93
   1   7  -9  125.44   13.33
  -1   7   9  129.10   10.19
   1  -7  -9  202.63   30.45
  -1  -7   9  174.15   20.03
   1   7  -8  128.82   12.29
  -1   7   8  102.16    9.07
   1  -7  -8  191.97   12.09
  -1  -7   8  150.06   10.85
   1   7  -7  160.26   13.06
  -1   7   7  121.31   28.89
   1  -7  -7  203.07   10.45
  -1  -7   7  221.10   27.64
   1   7  -6   86.85   10.55
  -1   7   6   73.67   11.37
   1  -7  -6  112.49   11.09
  -1  -7   6  119.17   38.61
   1   7  -5  167.75   15.83
  -1   7   5  128.91   10.63
   1  -7  -5  227.40   21.12
  -1  -7   5  219.14   14.96
   1   7  -4  118.64   13.67
  -1   7   4  113.82   11.73
   1  -7  -4  163.40   11.59
  -1  -7   4  148.10   10.89
   1   7  -3    0.42    5.56
  -1   7   3   -1.88    8.81
  -1  -7   3   10.22    8.20
   1  -7  -3    7.44    6.02
   1   7  -2  179.00   13.03
  -1   7   2  185.31   15.13
  -1  -7   2  225.64   15.05
   1  -7  -2  234.41   30.77
   1   7  -1   81.55   11.14
  -1   7   1   63.27   12.51
  -1  -7   1  127.97   12.91
   1  -7  -1  119.37   12.19
   1   7   0   27.14   19.57
  -1   7   0   19.19    8.34
  -1  -7   0   51.78   11.23
   1  -7   0   35.62   19.56
   1   7   1   32.34    9.44
  -1   7  -1   53.89   11.10
  -1  -7  -1   59.62   20.32
   1  -7   1   75.16   10.85
   1   7   2   47.11    8.57
  -1   7  -2   43.07    8.30
  -1  -7  -2   67.29    8.66
   1  -7   2   65.39    7.73
   1   7   3   87.94    9.36
  -1   7  -3   71.57   10.93
  -1  -7  -3  128.39   10.50
   1  -7   3  133.99   13.27
   1   7   4   78.99   12.90
  -1   7  -4   64.85   10.13
  -1  -7  -4   73.79    8.28
   1  -7   4   73.72   11.28
   1   7   5  124.22   12.38
  -1   7  -5  107.64    9.21
  -1  -7  -5  165.24    9.38
   1  -7   5  150.24   10.57
   1   7   6    2.96    4.31
  -1   7  -6   10.98    9.01
  -1  -7  -6    0.26    5.71
   1  -7   6    4.77    5.20
   1   7   7  324.57   15.02
  -1   7  -7  284.39   19.40
  -1  -7  -7  506.54   20.29
   1  -7   7  524.37   22.50
  -1   7  -8   25.16    9.01
   1   7   8   51.10   10.18
  -1  -7  -8   68.08   24.41
   1  -7   8   80.13   13.95
  -1   7  -9  323.74   18.61
   1   7   9  316.35   16.24
   1  -7   9  482.70   23.94
  -1   7 -10  139.32   13.64
   1   7  10  167.82   27.79
   1   7  10  152.49    8.78
   1  -7  10  260.77   38.46
  -1   7 -11  330.71   29.46
   1   7  11  417.46   18.71
   1   7  11  378.97   15.14
   1  -7  11  602.53   42.85
   1   7  12   16.32    7.35
   1   7  12    7.29    9.47
  -1   7 -12   16.85    7.99
   1  -7  12   36.05   11.48
   1   7  13  140.10    9.43
   1   7  13  189.55   14.74
  -1   7 -13  128.67    8.20
   1  -7  13  239.46   28.11
   1   7  14   18.38    5.79
   1   7  14   17.16   12.73
  -1   7 -14   15.81    7.09
   1  -7  14   25.67   15.23
   1   7  15    3.90    9.10
   1  -7  15   -1.19    8.66
   1   7  16   13.62    9.72
   1  -7  16   15.55   11.41
   1   7  17   38.14   12.49
   1  -7  17   19.08    8.97
   1   7  18    3.74    9.18
   1  -7  18  -11.67    9.05
   1   7  19    5.00    8.43
   1  -7  19   10.06    6.36
   1  -8 -19   10.82    7.27
  -1  -8  19   35.95    9.10
   1  -8 -18    2.96    4.17
  -1  -8  18   13.49    9.69
   1  -8 -17   20.65   12.71
  -1  -8  17   15.62    7.78
   1  -8 -16    4.35    4.66
  -1  -8  16   -1.65   10.05
   1   8 -15   35.63   19.90
  -1   8  15   27.93    7.26
   1  -8 -15   69.65   29.35
  -1  -8  15   62.62   18.26
   1   8 -14    0.54    5.48
  -1   8  14   12.52    5.37
   1  -8 -14   -1.82    7.18
  -1  -8  14   10.42    7.74
   1   8 -13    1.58    6.02
  -1   8  13    0.55    5.62
   1  -8 -13    9.33    7.86
  -1  -8  13   -0.05    9.18
   1   8 -12   62.29   11.24
  -1   8  12   40.06    8.43
   1  -8 -12   82.69   28.58
  -1  -8  12   58.27   14.37
   1   8 -11   25.73    8.12
  -1   8  11   27.63    9.50
   1  -8 -11   25.32   13.10
  -1  -8  11   30.69    9.28
   1   8 -10  239.56   15.05
  -1   8  10  185.40   11.34
   1  -8 -10  385.77   17.87
  -1  -8  10  329.31   14.31
   1   8  -9  107.63   13.62
  -1   8   9   74.65   22.64
   1  -8  -9  174.51   38.79
  -1  -8   9  155.44   15.56
   1   8  -8  143.73   12.46
  -1   8   8  113.10   11.13
   1  -8  -8  214.54   16.92
  -1  -8   8  190.42   48.00
   1   8  -7   95.96   14.19
  -1   8   7   78.16   21.55
   1  -8  -7  126.36   12.98
  -1  -8   7  122.53   10.68
   1   8  -6   24.42   10.82
  -1   8   6   21.84    9.14
   1  -8  -6   35.73   23.04
  -1  -8   6   56.60    9.76
   1   8  -5  134.96   13.25
  -1   8   5  121.18   10.88
   1  -8  -5  200.01   30.17
  -1  -8   5  216.99   25.21
   1   8  -4   19.37   13.29
  -1   8   4    7.83    9.19
   1  -8  -4    9.66    7.98
  -1  -8   4   -0.34    8.87
   1   8  -3  312.75   17.31
  -1   8   3  276.55   16.97
   1  -8  -3  429.68   29.85
  -1  -8   3  409.45   18.74
   1   8  -2   14.40    9.42
  -1   8   2   27.82   10.89
   1  -8  -2   29.24   11.01
  -1  -8   2   16.78    9.33
   1   8  -1   30.53    9.37
  -1   8   1   33.04    9.42
  -1  -8   1   50.53   15.07
   1  -8  -1   58.94    8.67
   1   8   0   38.35    9.78
  -1   8   0   41.37   13.31
  -1  -8   0   58.50   13.51
   1  -8   0   53.67   21.94
   1   8   1    5.38    9.86
  -1   8  -1    6.36    9.00
   1  -8   1   13.13    9.28
  -1  -8  -1   11.35    7.99
   1   8   2  288.29   17.82
  -1   8  -2  271.28   17.08
  -1  -8  -2  422.64   25.55
   1  -8   2  400.98   17.02
   1   8   3   30.02    9.11
  -1   8  -3   29.46   11.73
  -1  -8  -3   54.75   12.72
   1  -8   3   42.11   11.53
   1   8   4  309.89   15.82
  -1   8  -4  267.78   25.14
  -1  -8  -4  443.48   16.90
   1  -8   4  445.74   19.79
   1   8   5   68.44   13.26
  -1   8  -5   55.32   10.05
  -1  -8  -5   97.61   38.59
   1  -8   5  102.53   16.14
   1   8   6    7.23    8.92
  -1   8  -6   13.67   12.71
  -1  -8  -6   -7.27    9.63
   1  -8   6   11.53    9.24
  -1   8  -7  194.56   15.33
   1   8   7  200.20   14.15
  -1  -8  -7  326.12   31.01
   1  -8   7  322.04   19.97
  -1   8  -8   80.23   13.53
   1   8   8  102.49   11.42
  -1  -8  -8  158.42   54.92
   1  -8   8  144.80   13.95
  -1   8  -9  296.82   15.22
   1   8   9  301.08   13.48
  -1  -8  -9  552.60   24.07
   1  -8   9  479.91   20.21
  -1   8 -10   65.02   10.38
   1   8  10   80.45   10.08
  -1  -8 -10  154.53   16.19
   1  -8  10  111.32   34.15
  -1   8 -11  117.02   18.26
   1   8  11  135.97    8.96
  -1  -8 -11  238.29   13.50
   1  -8  11  217.92   28.34
  -1   8 -12   11.76    5.90
   1   8  12   15.11    6.25
  -1  -8 -12   15.92   10.50
   1  -8  12   26.29   12.95
   1   8  13   20.34    8.93
  -1   8 -13    7.17    5.24
   1  -8  13   19.78   15.67
  -1   8 -14   37.32    8.04
   1   8  14   26.76    9.48
   1   8  14   36.30    7.09
   1  -8  14   70.18   29.41
   1   8  15    8.05    6.02
   1  -8  15    7.72    6.23
   1   8  16   35.92    9.38
   1  -8  16   49.61   14.71
   1   8  17   21.08    9.50
   1  -8  17   18.72    8.41
   1   8  18   12.26   11.12
   1  -8  18    8.78    5.91
   1  -9 -17   11.99    7.07
  -1  -9  17   22.00    8.60
   1  -9 -16    9.02    6.42
  -1  -9  16    2.61    8.52
   1   9 -15    1.65    4.44
  -1   9  15    3.76    5.71
   1  -9 -15   -1.45    6.67
  -1  -9  15    0.81    5.66
   1   9 -14    2.95    5.41
  -1   9  14   -2.85    6.04
   1  -9 -14    3.76    5.70
  -1  -9  14    5.42    9.39
  -1   9  13   42.13    8.87
   1   9 -13   17.05    9.58
   1  -9 -13   40.17   16.24
  -1  -9  13   39.69   11.98
   1   9 -12   22.23   10.86
  -1   9  12   16.88    6.53
   1  -9 -12   15.65   11.31
  -1  -9  12   11.08   10.21
   1   9 -11   75.57   11.79
  -1   9  11   79.32    9.14
   1  -9 -11  132.53   20.48
  -1  -9  11  130.58   14.96
  -1   9  10   64.37   10.24
   1   9 -10   74.93   14.11
   1  -9 -10   88.42   33.45
  -1  -9  10   76.70   33.93
  -1   9   9   51.51   14.40
   1   9  -9   37.88   10.82
   1  -9  -9   41.20   22.11
  -1  -9   9   70.58   11.50
   1   9  -8  147.11   18.70
  -1   9   8  116.22   12.54
   1  -9  -8  196.40   25.31
  -1  -9   8  215.96   32.83
   1   9  -7   68.40   25.59
  -1   9   7   64.69   26.61
   1  -9  -7  112.08   36.07
  -1  -9   7  100.74   38.94
   1   9  -6  141.64   38.82
  -1   9   6  130.36   14.22
   1  -9  -6  195.59   13.82
  -1  -9   6  212.12   14.32
   1   9  -5  258.82   18.32
  -1   9   5  240.67   17.27
  -1  -9   5  371.15   21.31
   1  -9  -5  358.28   22.42
   1   9  -4   11.49   10.13
  -1   9   4    6.80   10.18
   1  -9  -4    5.06    8.82
  -1  -9   4   24.20   12.37
   1   9  -3  554.09   29.18
  -1   9   3  510.89   27.60
   1  -9  -3  817.20   37.87
  -1  -9   3  788.54   36.60
   1   9  -2   -0.11   10.32
  -1   9   2    2.23    4.48
   1  -9  -2    0.27    7.87
  -1  -9   2    6.19    7.95
   1   9  -1  473.03   25.56
  -1   9   1  403.74   22.59
   1  -9  -1  671.66   37.73
  -1  -9   1  721.20   42.48
   1   9   0   19.33    9.31
  -1   9   0   26.99   13.17
  -1  -9   0   58.47   15.29
   1  -9   0   36.33    9.34
   1   9   1   18.47   11.06
  -1   9  -1    8.67    9.82
   1  -9   1    7.14   13.17
  -1  -9  -1   24.47   15.24
   1   9   2   70.57   30.38
  -1   9  -2   89.20   15.68
  -1  -9  -2  104.37   32.21
   1  -9   2   98.60   35.05
   1   9   3   66.08   14.03
  -1   9  -3   41.62   26.56
  -1  -9  -3  104.94   25.94
   1  -9   3   76.54   24.27
   1   9   4  105.04   12.63
  -1   9  -4   88.65   24.47
  -1  -9  -4  194.85   17.02
   1  -9   4  147.54   10.81
   1   9   5   28.64    9.55
  -1   9  -5   12.17   11.47
  -1  -9  -5   52.91   18.02
   1  -9   5   46.18   21.54
   1   9   6   28.17    9.42
  -1   9  -6   25.80   10.31
  -1  -9  -6   39.45   17.59
   1  -9   6   27.78   10.46
  -1   9  -7   38.22    9.84
   1   9   7   45.90   11.65
  -1  -9  -7   73.52   29.36
   1  -9   7   55.60   16.31
   1   9   8    1.35    8.34
  -1   9  -8   -5.85   10.61
  -1  -9  -8    8.51    5.35
   1  -9   8    4.09    5.88
   1   9   9   76.08   26.66
  -1   9  -9   90.93   33.79
  -1  -9  -9  176.43   14.75
   1  -9   9  124.96   41.78
  -1   9 -10    3.99    6.66
   1   9  10    2.35    6.47
  -1  -9 -10    3.26    4.33
   1  -9  10    0.90    9.84
   1   9  11   46.68   10.77
  -1   9 -11   21.84   11.37
  -1  -9 -11   42.22    9.80
   1  -9  11   67.08   19.95
   1   9  12    3.87    3.97
  -1   9 -12   14.70    9.39
  -1  -9 -12   -6.23    9.27
   1  -9  12    1.92   11.71
  -1   9 -13   11.04    5.70
   1   9  13    3.20    5.79
  -1  -9 -13    9.27    7.00
   1  -9  13    8.37    7.90
  -1   9 -14   -0.83    6.05
   1   9  14   18.22    7.94
  -1  -9 -14    8.64    6.26
   1  -9  14    6.95    9.58
  -1  -9 -15    4.20    6.43
   1  -9  15    6.39   10.28
  -1  -9 -16   19.81   12.56
   1  -9  16   22.20   19.69
   1 -10 -16    4.76    5.15
  -1 -10  16   -7.24    9.69
   1  10 -15   10.50    7.27
  -1  10  15    3.59    3.27
   1 -10 -15    8.30    5.99
  -1 -10  15   -0.07    5.64
   1  10 -14   -3.47    6.57
  -1  10  14   12.54    8.85
   1 -10 -14   -1.04    4.43
  -1 -10  14    4.10    7.86
  -1  10  13   17.92    9.48
   1  10 -13   18.49    7.84
   1 -10 -13   22.99   10.09
  -1 -10  13   21.32   12.36
   1  10 -12   -3.79    7.75
  -1  10  12    6.29    7.02
   1 -10 -12   -3.67    6.48
  -1 -10  12   -6.82   10.41
   1  10 -11   42.01    7.72
  -1  10  11   30.02    9.93
   1 -10 -11   53.06    7.90
  -1 -10  11   69.10   15.59
   1  10 -10    3.20    7.20
  -1  10  10    8.22    7.81
   1 -10 -10    1.78    4.36
  -1 -10  10    5.38   11.22
   1  10  -9   45.98   14.12
  -1  10   9   23.43    8.80
   1 -10  -9   60.77    9.72
  -1 -10   9   62.94   14.47
  -1  10   8   15.03    9.48
   1  10  -8   53.91   13.31
   1 -10  -8   16.48    8.49
  -1 -10   8   31.08   10.41
   1  10  -7  177.37   16.05
  -1  10   7  134.01   14.22
   1 -10  -7  291.34   13.89
  -1 -10   7  261.68   26.20
   1  10  -6   28.72   17.39
  -1  10   6   25.03   12.71
   1 -10  -6   25.68    9.68
  -1 -10   6   25.52   10.26
   1  10  -5  347.39   18.59
  -1  10   5  342.53   16.93
  -1 -10   5  571.67   19.55
   1 -10  -5  583.36   21.05
   1  10  -4    0.58   10.60
  -1  10   4  -11.13   11.32
   1 -10  -4   -5.55   10.53
  -1 -10   4   14.73   10.42
   1  10  -3  408.07   21.27
  -1  10   3  355.28   20.75
   1 -10  -3  601.11   26.31
  -1 -10   3  585.35   32.90
   1  10  -2   -1.48   11.27
  -1  10   2   10.21   15.46
  -1 -10   2    1.76    5.85
   1 -10  -2    3.21   11.39
   1  10  -1  223.04   16.85
  -1  10   1  209.12   16.55
  -1 -10   1  309.05   33.23
   1 -10  -1  339.68   19.13
   1  10   0    9.40    9.61
  -1  10   0    3.87   10.42
   1 -10   0    4.46    6.49
  -1 -10   0    8.71    8.76
   1  10   1    3.91   10.34
  -1  10  -1    9.05   11.14
   1 -10   1   32.98   13.88
  -1 -10  -1   14.02   10.23
   1  10   2   43.29   10.85
  -1  10  -2   47.78   15.90
  -1 -10  -2   43.00   12.34
   1 -10   2   38.02   18.54
  -1  10  -3    8.49   10.66
   1  10   3   42.40   15.62
  -1 -10  -3   47.25   11.12
   1 -10   3   43.43   10.63
  -1  10  -4   -1.31   11.51
   1  10   4   22.93   13.91
  -1 -10  -4   22.38   14.86
   1 -10   4   18.25   11.22
   1  10   5    8.99    9.39
  -1  10  -5   10.76   12.45
  -1 -10  -5   18.36   10.88
   1 -10   5    2.81   11.09
   1  10   6   -4.62   10.26
  -1  10  -6    0.25   10.62
  -1 -10  -6   -3.70    8.06
   1 -10   6    0.78    7.33
  -1  10  -7    0.97    9.48
   1  10   7   11.51    9.34
  -1 -10  -7   -5.28   10.98
   1 -10   7    3.27    3.88
   1  10   8   -4.59    8.76
  -1  10  -8    4.43    7.39
  -1 -10  -8    1.67    9.85
   1 -10   8    6.70   12.12
   1  10   9    4.21    7.84
  -1  10  -9   21.87   12.29
  -1 -10  -9   -3.10    9.01
   1 -10   9   -2.93   10.17
   1  10  10   -7.02    7.26
  -1  10 -10    1.41    5.95
  -1 -10 -10    9.13   10.70
   1 -10  10   12.61   10.31
   1  10  11   19.29    9.83
  -1  10 -11   22.65   10.74
  -1 -10 -11   17.18   15.98
   1 -10  11    8.50   11.07
  -1  10 -12   -2.32    6.90
   1  10  12    0.34    6.72
  -1 -10 -12    6.01   10.45
   1 -10  12    3.36    7.30
  -1  10 -13   -3.53    6.23
   1  10  13   -0.23    6.30
  -1 -10 -13    9.04    9.29
   1 -10  13    4.85    7.86
  -1  10 -14    8.75    5.28
   1  10  14    8.16    6.67
  -1 -10 -14   15.72    9.92
   1 -10  14    6.14   11.29
  -1 -10 -15   -0.24    7.47
   1 -10  15   15.01   10.69
   1  11 -13   -3.15    7.39
  -1  11  13   10.07    6.54
   1 -11 -13    7.76    4.49
  -1 -11  13    0.93    6.36
  -1  11  12   -7.28    7.60
   1  11 -12    6.83    7.98
   1 -11 -12    8.49    7.57
  -1 -11  12   -2.81    9.12
   1  11 -11   16.21    8.07
  -1  11  11   16.46    8.74
   1 -11 -11   13.98    7.05
  -1 -11  11   54.08   13.51
  -1  11  10   11.81    9.20
   1  11 -10    4.38    8.75
   1 -11 -10   12.24   10.17
  -1 -11  10   15.07   15.45
   1  11  -9   78.25   13.15
  -1  11   9   68.05   14.08
   1 -11  -9   92.79   27.99
  -1 -11   9  116.72   13.01
  -1  11   8   36.37   13.97
   1  11  -8   12.09    8.93
  -1 -11   8    6.09    9.97
  -1  11   7  117.74   32.99
   1  11  -7  148.58   14.79
   1 -11  -7  261.52   14.28
  -1 -11   7  230.54   11.91
   1  11  -6   41.91   16.37
  -1  11   6   13.31    8.57
   1 -11  -6   -6.59    8.88
  -1 -11   6   21.17   15.13
  -1  11   5  182.09   14.91
   1  11  -5  267.36   18.04
   1 -11  -5  359.62   15.74
  -1 -11   5  377.81   20.81
   1  11  -4   27.71   15.03
  -1  11   4   20.38   12.04
   1 -11  -4   35.13   13.55
  -1 -11   4   23.32   14.63
  -1  11   3  109.15   34.27
   1 -11  -3  245.87   16.70
  -1 -11   3  251.98   17.89
   1  11  -2    0.03   11.54
  -1  11   2   15.92   10.09
   1 -11  -2   -0.88    6.91
  -1 -11   2   -3.37   11.53
  -1  11   1   42.35   18.03
   1  11  -1   66.38   11.56
   1 -11  -1  106.05   11.54
  -1 -11   1   93.80   38.82
  -1  11   0   16.30   11.81
   1  11   0    1.50   10.41
  -1 -11   0    7.03   10.45
   1 -11   0    5.71    4.54
   1  11   1   22.72   10.13
  -1  11  -1   11.67   11.35
   1 -11   1   52.14   10.07
  -1 -11  -1   48.19   21.96
  -1  11  -2    3.16   10.35
   1  11   2    5.64   11.50
   1 -11   2   -0.41   10.22
  -1 -11  -2    5.73    8.36
  -1  11  -3    9.93    7.95
   1  11   3   -0.75   10.57
  -1 -11  -3   -3.26   10.25
   1  11   4   22.90    9.16
  -1  11  -4   -3.77   11.13
  -1 -11  -4   23.27   11.43
   1 -11   4   25.84   13.25
  -1  11  -5   17.96   14.25
   1  11   5   -0.01    9.20
  -1 -11  -5   27.15   10.88
   1 -11   5   18.29   10.83
  -1  11  -6   14.54   12.17
   1  11   6   22.34   14.36
  -1 -11  -6   33.42   11.28
   1 -11   6   25.04   13.45
  -1  11  -7   26.28   12.93
   1  11   7   18.99   10.16
  -1 -11  -7   29.70   13.56
   1 -11   7   27.52   16.51
  -1  11  -8   12.90   10.23
   1  11   8   14.44   10.16
  -1 -11  -8    4.83    6.38
   1 -11   8   -1.49    5.66
   1  11   9    6.01    6.65
  -1  11  -9    4.90    7.48
  -1 -11  -9    2.64    7.12
   1 -11   9   13.76   16.79
  -1  11 -10   -0.31    8.12
   1  11  10   -3.31    8.24
  -1 -11 -10   -1.66    8.12
   1 -11  10    6.24   12.41
   1  11  11   -3.86    8.01
  -1  11 -11    0.96    7.92
  -1 -11 -11    9.90    8.87
   1 -11  11    4.04    6.16
  -1  11 -12   -3.20    7.31
   1  11  12    4.93    7.02
  -1 -11 -12   21.93    9.47
   1 -11  12   -4.08   10.45
  -1  12  11   -0.40    7.83
   1  12 -11   -2.03    8.21
   1 -12 -11    6.70    5.95
  -1 -12  11   -2.43    9.29
  -1  12  10   16.01    8.61
   1  12 -10   16.11   10.37
   1 -12 -10   12.54    9.12
  -1 -12  10    9.82   11.91
   1  12  -9   48.20   12.95
  -1  12   9   26.84    9.71
   1 -12  -9  103.07   15.27
  -1 -12   9   67.35   11.00
  -1  12   8    3.52    8.80
   1  12  -8   21.81   13.26
   1 -12  -8   25.91   11.72
  -1 -12   8   17.63   21.36
  -1  12   7  112.63   14.65
   1  12  -7   99.12   10.59
   1 -12  -7  191.79   16.66
  -1 -12   7  216.67   17.86
   1  12  -6   35.45   10.88
  -1  12   6    7.07    8.81
   1 -12  -6   21.94   11.13
  -1 -12   6   16.75   11.67
  -1  12   5   41.85    9.69
   1  12  -5   79.98   11.50
   1 -12  -5  122.37   33.83
  -1 -12   5  141.67   15.78
  -1  12   4    8.93    7.90
   1  12  -4   39.61   14.04
   1 -12  -4   20.19   12.62
  -1 -12   4   33.53   14.53
  -1  12   3   19.77    8.91
   1  12  -3   23.79   10.03
  -1 -12   3   13.79   10.69
   1 -12  -3   32.72   13.31
   1  12  -2    9.10   11.04
  -1  12   2   29.70   16.10
  -1 -12   2   15.83   11.79
   1 -12  -2   30.79   10.90
   1  12  -1   29.65   11.86
  -1  12   1   36.96   11.83
  -1 -12   1   46.38   13.47
   1 -12  -1   34.06   14.71
   1  12   0   13.38   11.11
  -1  12   0    3.76    7.98
  -1 -12   0   -3.61    9.30
   1 -12   0    8.62   10.33
   1  12   1   54.06   11.30
  -1  12  -1   40.67   10.45
   1 -12   1   62.69   26.56
  -1 -12  -1   57.21    9.48
  -1  12  -2    9.66    8.92
   1  12   2   24.90   15.59
  -1 -12  -2   14.43    9.51
   1 -12   2    8.27    8.94
  -1  12  -3   -2.47   10.20
   1  12   3   15.00   10.01
  -1 -12  -3   12.43   14.23
   1 -12   3   28.33    9.84
  -1  12  -4    7.65   11.01
   1  12   4    3.11    7.15
  -1 -12  -4    3.29    7.41
   1 -12   4    4.99    9.53
  -1  12  -5   11.35   13.70
   1  12   5   21.92    9.39
  -1 -12  -5   12.72   10.71
   1 -12   5   24.89   12.41
   1  12   6   -7.88    8.61
  -1  12  -6    1.82    5.65
  -1 -12  -6    6.55    9.74
   1 -12   6    7.65    8.76
  -1  12  -7   57.20   14.23
   1  12   7   39.46   12.35
  -1 -12  -7   81.87   10.42
   1 -12   7   67.23   10.61
  -1  12  -8    3.28    4.78
   1  12   8    4.62    7.97
  -1 -12  -8    4.52    8.16
   1 -12   8   -2.04    7.61
  -1  12  -9  -11.43   10.02
   1  12   9   16.51   12.41
  -1 -12  -9   29.01   23.26
   1 -12   9   41.80   12.24
  -1  12 -10    2.49    7.98
   1  12  10    1.18    8.30
  -1 -12 -10    2.95    8.96
   1 -12  10   -0.24   11.38
  -1  13   6   23.56   15.23
   1  13  -6   14.80   11.91
   1 -13  -6   41.69   12.59
  -1 -13   6   24.04   13.03
  -1  13   5   17.02   11.35
   1  13  -5   24.88   11.96
   1 -13  -5   35.05   18.44
  -1 -13   5   37.35   15.82
   1  13  -4   33.91   15.79
  -1  13   4   14.32    9.80
   1 -13  -4   10.45   10.18
  -1 -13   4   19.76   10.85
   1  13  -3   -9.10    9.98
  -1  13   3   -1.00   10.03
  -1 -13   3   -0.71   10.21
   1 -13  -3    6.26   13.01
  -1  13   2   15.31   17.21
   1  13  -2   10.05   10.72
   1 -13  -2   18.86   17.80
   1  13  -1    6.15   11.71
  -1  13   1   -4.62   12.59
   1 -13  -1   -3.19   10.42
  -1 -13   1    4.53    6.69
   1  13   0   40.29   20.22
  -1  13   0   26.17   16.01
   1 -13   0   16.97   15.42
  -1 -13   0   30.88   13.17
   1  13   1    5.41   11.98
  -1  13  -1   39.93   14.41
  -1 -13  -1    6.70    7.98
   1 -13   1   -3.88    9.68
  -1  13  -2   23.14    9.94
   1  13   2   15.50    9.66
  -1 -13  -2    7.50   10.05
   1 -13   2    5.00    9.52
  -1  13  -3    7.81   10.83
   1  13   3   11.89    9.58
  -1 -13  -3    4.55   10.26
   1 -13   3   -1.26    9.95
  -1  13  -4   -1.96   11.78
   1  13   4    8.31   11.24
  -1 -13  -4    1.75    7.95
   1 -13   4    5.59    9.69
  -1  13  -5   13.33   10.56
   1  13   5    2.59   10.15
  -1 -13  -5   18.93   14.36
   1 -13   5   12.53    8.17
  -2   0  23    5.92    5.15
  -2   0  22   -3.21    7.98
  -2   0  21    2.06    3.88
  -2   0  20    3.57    4.59
  -2   0  19   -1.04    6.97
  -2   0  18    3.09    6.81
  -2   0  17    9.69    5.84
  -2   0  16  372.27   14.94
  -2   0  15    2.89    2.27
  -2   0  14 1497.52   52.05
  -2   0  13   -1.67    6.24
   2   0 -13   -0.20    0.67
   2   0 -13    0.06    0.63
  -2   0  12 2032.18   62.60
   2   0 -12 2141.45   64.36
   2   0 -12 1131.48   34.19
   2   0 -11    2.00    2.88
  -2   0  11   -8.68    5.64
  -2   0  11   -0.17    1.13
   2   0 -11    2.18    1.77
   2   0 -10  297.22    9.69
  -2   0  10  281.82   10.80
  -2   0  10  306.88    9.08
   2   0 -10  315.91    9.79
   2   0  -9   -0.21    2.93
  -2   0   9   -0.70    3.06
  -2   0   9    0.38    1.67
   2   0  -9    0.27    1.02
   2   0  -8 1835.73   44.46
  -2   0   8 1825.29   45.32
  -2   0   8 1869.44   44.89
   2   0  -8 1882.91   45.39
   2   0  -7    0.69    1.36
  -2   0   7   -0.38    3.70
  -2   0   7    0.24    1.26
   2   0  -7   -3.61    3.70
   2   0  -6 9999.00  161.65
   2   0  -5   -3.05    3.15
  -2   0   5   -2.55    4.15
  -2   0   5   -0.65    4.41
   2   0  -5  -12.97    7.90
   2   0  -4 2046.94   33.61
  -2   0   4 2083.85   34.43
  -2   0   4 1975.34   33.98
   2   0  -4 2122.67   39.85
   2   0  -3   -0.53    0.88
  -2   0   3    4.74    4.83
   2   0  -3    4.24    6.35
   2   0  -2   53.64    2.31
   2   0  -2   74.45   12.44
  -2   0   2   70.30    4.14
   2   0   0 3417.89   55.78
  -2   0   0 3378.27   55.10
   2   0   0 3708.91   60.55
  -2   0   0 3586.52   58.69
   2   0   1    0.28    7.13
  -2   0  -1    1.46    3.16
   2   0   1    2.42    4.21
  -2   0  -1    0.95    2.24
   2   0   2 1496.23   32.08
  -2   0  -2 1414.98   26.05
   2   0   2 1468.61   43.39
  -2   0  -2 1431.04   26.45
  -2   0  -3   -4.24    6.88
   2   0   3   -9.95    8.46
  -2   0  -3   -1.78    4.07
   2   0   3   -3.39    5.71
   2   0   4  321.10   15.18
  -2   0  -4  327.91   12.47
  -2   0  -4  335.42   11.63
   2   0   4  322.97   11.67
  -2   0  -5    3.14    2.46
   2   0   5    7.08    6.54
  -2   0  -5   -0.40    1.87
   2   0   5   -5.29    2.42
  -2   0  -6  272.76   14.22
   2   0   6  281.24   15.80
  -2   0  -6  290.00   12.96
   2   0   6  293.18   15.32
   2   0   7   -3.02    8.84
   2   0   7   -1.54    1.75
   2   0   7    2.80    1.54
   2   0   8  272.59   13.79
   2   0   8  305.97    8.67
   2   0   8  193.56    9.67
   2   0   9   -2.74    8.18
   2   0  10   42.75   11.85
   2   0  11    7.11    5.29
   2   0  12   19.05    9.29
   2   0  13    5.32    9.99
   2   0  14   60.17   19.13
   2   0  15    2.34    6.37
   2   0  16  243.54   16.99
   2   0  17   -7.45   10.11
   2   0  18  332.71   16.21
   2   0  19    3.15    6.11
   2   0  20  371.98   40.86
   2   0  21    7.98   10.43
  -2   1  23   10.99    6.79
  -2  -1  23    5.91    6.81
  -2   1  22   -1.34    7.84
  -2  -1  22    3.78    3.33
  -2   1  21   30.22    9.50
  -2  -1  21   10.60    7.95
  -2   1  20    4.03    6.65
  -2  -1  20   13.28    6.59
  -2   1  19    1.52    6.52
  -2  -1  19    4.99    3.22
  -2   1  18   47.89   13.99
  -2  -1  18   43.24   10.43
  -2   1  17    0.46    6.61
  -2  -1  17    3.63    3.69
  -2   1  16  103.55    8.82
  -2  -1  16  119.28    9.18
  -2   1  15  163.90    9.01
  -2  -1  15  175.99    9.83
  -2   1  14  329.39   13.54
   2   1 -14  302.52    9.86
  -2  -1  14  349.56   14.19
  -2  -1  14  382.88   12.32
   2   1 -13  508.14   13.73
  -2   1  13  490.09   15.73
  -2  -1  13  515.37   15.58
   2  -1 -13  524.28   13.88
  -2  -1  13  538.28   14.32
   2  -1 -13  449.17   11.96
   2   1 -12  743.23   23.56
  -2   1  12  703.79   23.47
  -2  -1  12  794.71   26.16
   2  -1 -12  756.43   23.87
  -2  -1  12  753.72   23.44
   2  -1 -12  578.93   17.83
   2   1 -11  192.31    5.91
   2   1 -11  182.90    3.74
  -2   1  11  151.84    7.23
  -2  -1  11  188.76    7.84
  -2  -1  11  181.73    3.34
   2  -1 -11  185.52    4.29
   2  -1 -11  176.24    6.55
   2  -1 -11  124.18    3.25
   2   1 -10  895.05   33.55
   2   1 -10  969.16   26.11
  -2   1  10  828.29   23.59
  -2  -1  10  950.56   27.55
  -2  -1  10  898.79    5.56
   2  -1 -10  912.99    6.46
   2  -1 -10  870.33   33.80
   2  -1 -10  579.83    5.54
   2   1  -9    1.76    3.80
   2   1  -9    3.90    3.56
  -2   1   9   -0.11    5.70
   2  -1  -9    2.10    2.79
   2  -1  -9   -0.01    2.58
  -2  -1   9    2.38    2.42
  -2  -1   9    4.65    5.15
   2  -1  -9   -0.65    2.54
   2   1  -8 3804.13   91.09
   2   1  -8 4125.30   98.91
  -2   1   8 3319.24   81.45
   2  -1  -8 3765.27   90.20
   2  -1  -8 3898.33   92.80
  -2  -1   8 3673.54   88.19
  -2  -1   8 3812.16   92.20
   2  -1  -8 2105.10   50.59
   2   1  -7  111.32    5.70
   2   1  -7  121.08    6.28
  -2   1   7  101.33    6.29
   2  -1  -7  112.32    5.17
   2  -1  -7  111.32    5.63
  -2  -1   7  107.88    6.04
  -2  -1   7  118.55    6.44
   2   1  -6 4126.64   67.52
  -2   1   6 3433.47   56.22
   2   1  -6 4342.07   70.89
  -2   1   6 4025.09   65.97
  -2  -1   6 4065.05   66.50
   2  -1  -6 4138.76   67.58
  -2  -1   6 3922.45   64.15
   2  -1  -6 3736.56   60.99
   2   1  -5    7.88    5.91
  -2   1   5    5.92    4.88
   2   1  -5    7.98    6.78
  -2   1   5   10.60    5.63
   2  -1  -5    8.86    5.79
  -2  -1   5    9.74    4.58
  -2  -1   5    8.73    5.87
   2  -1  -5    8.04    4.17
   2   1  -4 3103.16   50.88
  -2   1   4 2400.22   39.35
   2   1  -4 3364.11   57.35
  -2   1   4 3128.82   51.34
  -2  -1   4 3104.82   50.89
   2  -1  -4 3127.88   52.00
  -2  -1   4 3124.86   54.89
   2  -1  -4 2614.41   42.73
  -2   1   3  504.69   17.85
   2   1  -3  547.45   19.33
   2   1  -3  590.95   31.19
   2  -1  -3  371.40   12.68
   2  -1  -3  537.07   24.62
   2  -1  -3  528.34   17.40
  -2  -1   3  530.49   22.66
  -2  -1   3  525.91   18.71
  -2   1   2 2461.04   40.82
  -2   1   2 2573.81   42.43
   2   1  -2 2671.15   45.37
   2  -1  -2 2620.70   43.67
  -2  -1   2 2645.35   43.68
  -2  -1   2 2567.72   42.80
   2  -1  -2 2555.11   41.77
  -2   1   1  405.96   13.43
   2   1  -1  296.17   11.86
  -2   1   1  422.73   15.02
  -2  -1   1  310.93   11.27
   2  -1  -1  412.22   15.42
   2  -1  -1  413.89   13.83
  -2  -1   1  429.19   14.97
  -2   1   0 3469.72   56.75
   2   1   0 2816.33   47.22
   2   1   0 3629.81   59.85
  -2   1   0 3558.10   59.37
   2  -1   0 3663.92   60.06
   2  -1   0 3773.24   61.86
  -2  -1   0 3664.18   60.38
  -2  -1   0 2890.76   49.80
  -2   1  -1 3127.58   51.63
  -2   1  -1 2971.32   49.45
   2   1   1 2612.02   49.55
   2   1   1 3118.65   57.92
   2  -1   1 3099.58   60.03
  -2  -1  -1 2586.79   44.50
  -2  -1  -1 2975.24   51.77
   2  -1   1 3064.71   52.43
   2   1   2  313.05   15.46
  -2   1  -2  284.94   12.48
  -2   1  -2  295.69   11.64
   2  -1   2  316.19   15.91
  -2  -1  -2  255.32   10.91
  -2  -1  -2  321.31   14.57
   2  -1   2  307.71   13.23
  -2   1  -3  612.71   21.00
   2   1   3  673.39   23.54
   2   1   3  538.46   23.09
  -2  -1  -3  571.40   20.48
   2  -1   3  665.48   21.93
  -2  -1  -3  645.36   22.30
   2  -1   3  666.94   24.21
   2  -1   3  345.39   12.23
   2   1   4 1040.17   18.32
  -2   1  -4  966.88   31.59
   2   1   4  882.02   18.83
   2  -1   4  986.95   32.78
  -2  -1  -4  892.52   29.39
  -2  -1  -4  973.97    7.43
   2  -1   4 1011.80   17.66
   2  -1   4  572.92   18.86
  -2   1  -5  385.80   14.34
   2   1   5  406.43   13.54
   2   1   5  335.30   15.28
  -2  -1  -5  355.78   13.72
   2  -1   5  409.66   16.92
  -2  -1  -5  388.03   13.20
   2  -1   5  398.54   16.00
   2  -1   5  241.77    8.88
  -2   1  -6   26.18    9.57
   2   1   6   29.37    8.24
   2   1   6   21.55   10.46
   2  -1   6   31.99    8.43
   2  -1   6   31.72    3.55
  -2  -1  -6   28.80   10.56
  -2  -1  -6   26.11    9.86
   2  -1   6   15.71    2.62
   2   1   7  391.19   17.51
   2   1   7  293.05   17.14
   2  -1   7  366.80   20.26
   2  -1   7  379.94   17.31
  -2  -1  -7  366.13   16.46
   2  -1   7  270.95   12.42
   2   1   8  110.23    4.19
   2   1   8   90.35    8.04
   2  -1   8  127.11   16.28
  -2  -1  -8  118.35    4.54
   2  -1   8  118.77    5.40
   2  -1   8   99.42    4.20
   2   1   9   76.69    2.91
   2   1   9  105.12   39.65
   2  -1   9  107.48    7.85
   2  -1   9  102.60    3.44
  -2  -1  -9  103.59    3.34
   2  -1   9   92.23    4.36
   2   1  10    3.58    6.47
   2  -1  10   -1.89    8.12
   2  -1  10    2.43    1.45
   2   1  11  487.47   16.22
   2  -1  11  546.02   18.84
   2   1  12   31.68   13.92
   2  -1  12   35.22    9.53
   2   1  13  317.74   16.55
   2  -1  13  361.33   16.88
   2   1  14   18.23   17.01
   2  -1  14   22.23   13.02
   2   1  15   13.37   12.96
   2  -1  15   34.29   10.55
   2   1  16  100.28   25.00
   2  -1  16  123.84   35.25
   2   1  17    6.69    8.71
   2  -1  17    2.23    8.64
   2   1  18  316.29   15.76
   2  -1  18  390.69   23.25
   2   1  19   17.46   10.51
   2  -1  19   20.51   21.92
   2   1  20  275.33   49.14
   2  -1  20  285.67   32.18
   2   1  21    8.79    6.08
   2  -1  21    9.29    8.60
  -2   2  23   17.96    6.58
  -2  -2  23    8.49    7.11
  -2   2  22    4.07    6.09
  -2  -2  22    3.27    4.48
  -2   2  21   56.54   16.84
  -2  -2  21   73.75   10.40
  -2   2  20    6.56    5.32
  -2  -2  20    5.99    6.83
  -2   2  19    8.40    9.24
  -2  -2  19    6.75    6.74
  -2   2  18   39.05    6.11
  -2  -2  18   37.62   10.02
  -2   2  17   54.94   10.90
  -2  -2  17   39.79    6.66
   2   2 -16    7.80    1.24
  -2   2  16   26.99    6.56
  -2  -2  16   13.20    6.11
   2   2 -15   88.72    5.14
  -2   2  15  110.14    8.33
  -2  -2  15  144.81    7.95
   2  -2 -15  141.23    2.33
  -2  -2  15  141.27    3.28
   2   2 -14    5.94    2.56
  -2   2  14    8.63    5.88
  -2  -2  14   10.79    3.40
   2  -2 -14    9.77    4.07
   2  -2 -14   11.08    3.83
  -2  -2  14   21.25   16.18
   2   2 -13  515.50   18.29
  -2   2  13  510.32   20.16
   2  -2 -13  561.88   18.34
  -2  -2  13  556.03   19.43
   2  -2 -13  504.53   17.37
  -2  -2  13  576.01   21.57
   2   2 -12  362.14   10.77
  -2   2  12  321.40   15.56
  -2  -2  12  381.55   17.22
  -2  -2  12  373.10   15.47
   2  -2 -12  381.82   15.58
   2  -2 -12  320.27   13.46
   2   2 -11  356.96   12.68
  -2   2  11  339.97   15.27
   2  -2 -11  352.36   13.32
   2  -2 -11  383.21   13.64
  -2  -2  11  359.38   12.69
  -2  -2  11  383.74   15.29
   2  -2 -11  281.79    9.92
   2   2 -10 2111.46   56.54
   2   2 -10 2183.39   57.83
  -2   2  10 1865.87   50.66
   2  -2 -10 2027.82   54.58
   2  -2 -10 2189.44   57.94
  -2  -2  10 2190.80   57.98
  -2  -2  10 2252.94   63.58
   2   2  -9  308.89   10.10
   2   2  -9  310.15   16.98
  -2   2   9  270.96   20.66
   2  -2  -9  273.81   10.18
   2  -2  -9  295.80   14.84
  -2  -2   9  298.44    9.41
  -2  -2   9  292.19   11.46
   2  -2  -9  198.52    6.75
   2   2  -8 2140.92   51.99
   2   2  -8 2212.80   53.74
  -2   2   8 1760.23   43.22
   2  -2  -8 1925.97   46.68
   2  -2  -8 2234.19   54.05
  -2  -2   8 2203.54   54.03
  -2  -2   8 2184.91   54.52
   2  -2  -8 1478.32   36.03
   2   2  -7  978.84   26.95
   2   2  -7 1007.97   25.46
  -2   2   7  761.66   19.63
   2  -2  -7  861.77   23.06
   2  -2  -7 1001.51   26.32
  -2  -2   7  969.98   24.16
  -2  -2   7  992.31   25.11
   2  -2  -7  639.60   16.39
   2   2  -6  631.91   21.27
   2   2  -6  663.33   22.04
  -2   2   6  458.92   15.94
   2  -2  -6  505.68   16.79
   2  -2  -6  631.25   20.83
  -2  -2   6  614.41   20.46
  -2  -2   6  628.84   21.14
   2  -2  -6  398.64   13.68
   2   2  -5   16.63    4.31
   2   2  -5   17.20   16.80
  -2   2   5   13.14    3.55
   2  -2  -5   10.81    4.13
   2  -2  -5   15.63    9.21
  -2  -2   5    8.37    4.64
  -2  -2   5   16.78    9.58
   2  -2  -5    5.91    3.86
   2   2  -4    4.74    4.44
   2   2  -4   11.12    8.37
   2  -2  -4   10.20    6.49
   2  -2  -4   -0.48    5.18
   2  -2  -4    6.67    5.71
  -2  -2   4   -0.80    6.93
  -2  -2   4   12.94    5.88
   2  -2  -4    4.26    5.21
   2   2  -3  841.51   29.87
  -2   2   3  825.31   26.56
   2   2  -3  799.91   26.20
  -2   2   3  407.10   16.22
  -2  -2   3  793.05   33.53
  -2  -2   3  798.62   27.10
   2  -2  -3  481.27   17.21
   2  -2  -3  807.31   26.31
   2   2  -2   14.89    9.68
   2   2  -2    9.52    6.05
  -2   2   2    8.85    3.63
  -2   2   2   11.35    8.66
  -2  -2   2   20.21    7.27
   2  -2  -2   11.98    9.19
   2  -2  -2   16.43    9.27
  -2  -2   2   18.31    7.22
   2   2  -1   38.05   10.05
  -2   2   1   49.83    6.78
  -2   2   1   45.33   10.16
  -2  -2   1   28.55    7.29
  -2  -2   1   55.07    7.82
  -2  -2   1   43.06   27.86
   2  -2  -1   48.55   10.05
   2  -2  -1   57.76   17.73
  -2   2   0 1689.36   28.95
   2   2   0 1755.34   32.62
   2   2   0 1208.61   23.41
   2  -2   0 1787.82   31.48
  -2  -2   0 1674.50   35.91
  -2  -2   0 1265.21   23.15
   2  -2   0 1089.36   21.69
  -2   2  -1  175.22    9.92
  -2   2  -1  327.97   12.08
   2   2   1  230.18   11.42
   2  -2   1  329.58   12.78
  -2  -2  -1  241.19   13.47
   2  -2   1  203.25    8.67
  -2  -2  -1  343.57   12.70
  -2   2  -2 1497.91   26.12
   2   2   2 1207.39   22.16
  -2   2  -2  843.68   18.00
   2   2   2 1549.15   28.03
  -2  -2  -2 1551.50   26.98
   2  -2   2 1495.90   26.01
   2  -2   2 1028.54   18.64
  -2  -2  -2 1219.16   21.82
  -2   2  -3  278.35   10.92
   2   2   3  218.28    9.55
  -2   2  -3  139.58    8.02
   2   2   3  293.13   11.58
  -2  -2  -3  297.63   11.41
   2  -2   3  291.69   13.60
   2  -2   3  184.02    7.89
  -2  -2  -3  229.70   10.08
  -2   2  -4 2596.43   43.77
  -2   2  -4 1399.39   24.21
   2   2   4 2700.62   44.99
   2  -2   4 2637.87   44.85
  -2  -2  -4 2214.42   37.62
  -2  -2  -4 2720.90   45.02
  -2   2  -5   -9.89    5.07
   2   2   5    2.04    2.69
   2   2   5    3.06    7.54
  -2  -2  -5   -0.69    3.53
   2  -2   5    0.48    4.25
  -2  -2  -5    4.99    2.31
   2  -2   5    2.82    5.70
   2  -2   5    0.24    3.06
   2   2   6  418.65   19.18
   2   2   6  366.40   18.55
  -2  -2  -6  383.45   20.14
   2  -2   6  445.54   20.68
  -2  -2  -6  441.08   20.11
   2  -2   6  411.45   20.56
   2  -2   6  321.40   15.15
   2   2   7  151.05    9.13
   2  -2   7  170.98    9.78
   2  -2   7  192.53    7.11
  -2  -2  -7  178.73    6.65
   2  -2   7  145.38    6.09
   2   2   8   45.87    6.05
   2   2   8   52.68   23.38
   2  -2   8   62.29    7.54
  -2  -2  -8   56.03    4.46
   2  -2   8   55.09    3.65
   2  -2   8   49.08    3.75
   2   2   9    0.74    0.77
   2   2   9   -2.20    8.07
   2  -2   9    1.47    1.83
  -2  -2  -9   -2.26    2.06
   2  -2   9    0.67    0.96
   2  -2   9   -7.54    8.22
   2   2  10   44.54    2.85
   2   2  10   59.92    9.03
   2  -2  10   63.93    5.57
  -2  -2 -10   61.13    5.78
   2  -2  10   52.70    3.45
   2  -2  10   62.87   11.14
   2   2  11  360.00   11.72
   2   2  11  526.03   21.64
   2  -2  11  601.53   20.02
  -2  -2 -11  599.56   19.36
   2  -2  11  579.68   18.65
   2  -2  11  621.36   24.05
   2   2  12   74.00   11.69
   2  -2  12   88.55   10.70
   2  -2  12   83.48    2.52
   2  -2  12   80.73    5.27
   2   2  13  134.95   10.75
   2  -2  13  180.47   13.04
   2   2  14    8.82   10.29
   2  -2  14   11.78    9.31
   2   2  15    9.51    5.46
   2  -2  15   -1.25    9.87
   2   2  16   92.82   14.22
   2  -2  16  103.31   14.51
   2   2  17   15.32    7.84
   2  -2  17   14.94   12.04
   2   2  18  120.78   13.61
   2  -2  18  136.53   15.20
   2   2  19  102.81   24.73
   2  -2  19   98.52   29.35
   2   2  20  169.59   20.92
   2  -2  20  137.96   38.82
   2   2  21   40.08   15.11
   2  -2  21   40.27   17.56
  -2  -3  23    3.98    5.82
  -2   3  22   37.91    6.78
  -2  -3  22   53.73   11.48
  -2   3  21   20.16   10.21
  -2  -3  21   18.15    7.36
  -2   3  20   -0.41    6.25
  -2  -3  20    5.28    3.29
  -2   3  19    4.96    3.94
  -2  -3  19   -2.60    6.79
  -2   3  18    6.07    6.70
  -2  -3  18   10.84    6.12
  -2   3  17   99.67   10.01
  -2  -3  17  115.90   10.17
   2   3 -16   -0.73    2.11
  -2   3  16   -8.16    6.43
  -2  -3  16    0.80    3.24
   2   3 -15  256.10    8.94
  -2  -3  15  363.88   15.38
  -2  -3  15  299.64   12.15
   2  -3 -15  331.46   11.72
   2   3 -14   12.90    4.52
  -2   3  14    6.66    5.69
   2  -3 -14   15.73    6.35
  -2  -3  14   23.29    3.04
   2  -3 -14   11.20    5.45
  -2  -3  14   15.24    9.01
   2   3 -13  305.37   12.26
  -2   3  13  251.80    8.90
   2  -3 -13  319.65    6.20
  -2  -3  13  303.45    5.76
   2  -3 -13  271.31    7.95
  -2  -3  13  364.22   18.30
   2   3 -12  131.05    8.31
  -2   3  12  131.79   10.92
   2  -3 -12  154.30    9.10
  -2  -3  12  148.00   12.11
   2  -3 -12  125.96    8.01
  -2  -3  12  168.04   24.65
   2   3 -11  107.68   14.91
  -2   3  11  101.66   11.05
  -2  -3  11  127.26   10.43
  -2  -3  11  108.31   10.83
   2  -3 -11  118.19   14.53
   2  -3 -11   90.38    5.36
  -2   3  10 2042.29   62.52
  -2  -3  10 2621.99   79.51
   2   3  -9  198.80    8.77
  -2   3   9  169.68    8.54
   2  -3  -9  174.05   13.11
   2  -3  -9  197.57   15.12
  -2  -3   9  198.31   11.97
  -2  -3   9  205.83    9.11
   2  -3  -9  154.37    7.55
   2   3  -8  792.46   30.69
   2   3  -8  806.57   30.77
  -2   3   8  611.34   23.79
   2  -3  -8  639.17   24.40
   2  -3  -8  833.48   31.82
  -2  -3   8  804.46   30.16
  -2  -3   8  834.04   32.22
   2  -3  -8  604.22   23.11
   2   3  -7 1095.98   28.15
  -2   3   7  783.58   20.70
  -2   3   7  545.60   15.61
   2   3  -7 1087.83   28.51
  -2  -3   7 1067.96   27.02
  -2  -3   7 1122.78   29.12
   2  -3  -7  765.16   19.80
   2  -3  -7  871.70   22.75
   2   3  -6   25.46    9.45
  -2   3   6   13.38    5.26
  -2   3   6   11.53    7.19
   2   3  -6   23.65    6.41
  -2  -3   6   30.51    4.63
  -2  -3   6   21.01   12.88
   2  -3  -6   24.16    4.50
   2  -3  -6   22.33    6.17
   2   3  -5  390.32   19.11
   2   3  -5  376.51   17.78
  -2   3   5  234.47   13.01
   2  -3  -5  280.08   13.37
  -2  -3   5  390.10   19.45
   2  -3  -5  399.26   18.50
  -2  -3   5  398.19   18.85
   2  -3  -5  262.41   12.95
   2   3  -4  623.49   21.21
  -2   3   4  331.23   13.98
   2   3  -4  606.42   20.76
  -2  -3   4  622.01   25.26
  -2  -3   4  591.32   19.78
   2  -3  -4  406.97   14.12
   2  -3  -4  659.88   21.86
   2  -3  -4  404.09   14.87
  -2   3   3    5.49    3.09
  -2   3   3    8.08    9.40
   2   3  -3    3.93    3.41
   2   3  -3   -8.56    6.49
  -2  -3   3    7.08    5.34
  -2  -3   3   -0.26    6.48
   2  -3  -3   -2.05    4.26
   2  -3  -3    5.90    4.47
   2   3  -2 3137.80   52.58
  -2   3   2 3246.34   53.73
   2   3  -2 3206.00   53.18
  -2   3   2 1892.31   33.26
  -2  -3   2 3190.47   53.05
   2  -3  -2 3330.13   55.29
   2  -3  -2 2148.31   36.08
  -2  -3   2 3329.78   56.80
  -2   3   1  256.78   10.47
  -2   3   1  133.91    9.81
   2   3  -1  229.19   11.47
  -2  -3   1  155.95    8.20
  -2  -3   1  262.90   11.81
  -2  -3   1  238.95   10.28
   2  -3  -1  251.52   11.50
   2  -3  -1  176.16    8.50
   2   3   0  276.83   11.27
  -2   3   0  255.86    9.56
  -2   3   0  170.69   10.60
  -2  -3   0  176.20    7.66
   2  -3   0  277.65   12.31
  -2  -3   0  287.51   11.95
  -2  -3   0  266.37   10.78
   2  -3   0  184.25    8.87
  -2   3  -1   51.11    7.36
  -2   3  -1   30.85    6.01
   2   3   1   48.86    7.19
   2   3   1   34.35   16.17
  -2  -3  -1   40.15    6.08
  -2  -3  -1   52.02    4.62
   2  -3   1   56.39   16.13
   2  -3   1   30.28    6.81
  -2   3  -2  969.77   19.06
   2   3   2 1113.98   21.08
   2   3   2 1525.67   30.64
  -2  -3  -2 1186.46   21.48
  -2  -3  -2 1598.78   28.16
   2  -3   2 1585.19   28.04
  -2   3  -3  110.85    7.91
   2   3   3   80.06    8.26
  -2   3  -3   73.79    8.60
   2   3   3  111.26    8.85
  -2  -3  -3  119.02    8.14
   2  -3   3  122.10   14.66
   2  -3   3   87.27    6.74
  -2  -3  -3   88.26    7.73
  -2   3  -4 1016.05   26.09
   2   3   4 1632.50   40.18
   2   3   4 1240.24   31.64
  -2  -3  -4 1339.90   34.08
   2  -3   4 1261.45   31.22
   2  -3   4 1703.93   42.79
  -2   3  -5    7.56    5.82
   2   3   5    7.97   10.96
   2   3   5    1.79    5.68
  -2  -3  -5    5.95    4.89
   2  -3   5    5.14    3.44
   2  -3   5    7.81    5.88
  -2   3  -6  540.62   21.15
   2   3   6  748.99   23.53
   2  -3   6  988.43   41.13
   2  -3   6  752.38   12.59
  -2  -3  -6  964.09    8.59
  -2   3  -7   -3.11    4.47
   2   3   7   11.15    7.62
   2   3   7    0.69    4.45
  -2  -3  -7   -0.23    3.85
   2  -3   7   -1.44    3.07
   2  -3   7   -2.59    8.60
  -2   3  -8  325.21    7.07
   2   3   8  521.82   21.03
   2   3   8  530.39    6.70
  -2  -3  -8  616.24   20.38
   2  -3   8  540.64    7.22
   2  -3   8  680.92   14.09
   2   3   9    0.85    1.81
   2   3   9    3.91    5.84
   2  -3   9   -0.56    2.80
  -2  -3  -9    3.22    2.79
   2  -3   9    1.12    3.08
   2  -3   9   -2.23    8.54
   2   3  10  318.99   13.33
   2   3  10  373.12   15.11
   2  -3  10  455.64   13.30
  -2  -3 -10  425.09   12.21
   2  -3  10  391.89    6.00
   2  -3  10  462.77   18.73
   2   3  11    1.69    2.08
   2   3  11    6.09    6.92
   2  -3  11    2.94    2.93
  -2  -3 -11    4.97    2.03
   2  -3  11    6.14    3.11
   2  -3  11    4.36    8.79
   2   3  12   69.19    7.05
   2   3  12  113.17   13.68
   2  -3  12  127.51   10.02
  -2  -3 -12  112.81    5.82
   2  -3  12  116.75    4.46
   2  -3  12  127.69    9.53
   2   3  13    0.49    1.07
   2   3  13    5.66   10.52
   2  -3  13    5.33    7.47
   2  -3  13    0.83    1.51
   2  -3  13    0.27    1.78
   2   3  14    8.82    8.94
   2  -3  14   17.83   10.07
   2  -3  14    8.31    3.02
   2   3  15   86.11   14.22
   2  -3  15   72.32   22.08
   2   3  16   30.10   17.37
   2  -3  16   28.58    7.26
   2   3  17   98.04   15.27
   2  -3  17  113.22   26.29
   2   3  18    9.33   10.12
   2  -3  18   15.14   10.38
   2   3  19   85.07   31.69
   2  -3  19  121.65   10.94
   2   3  20   26.59   14.38
   2  -3  20   12.56    7.19
   2   3  21   33.93   13.32
   2  -3  21   54.23   10.16
  -2  -4  22   72.73    9.45
  -2   4  21   14.10    7.31
  -2  -4  21   13.14    6.91
  -2   4  20    7.36    6.07
  -2  -4  20    7.59    7.44
  -2   4  19    2.65    6.39
  -2  -4  19    7.08    6.43
  -2   4  18   -3.12    6.19
  -2  -4  18    6.98    6.52
  -2   4  17   75.74    8.61
  -2  -4  17  100.60   15.71
  -2   4  16   26.94    9.22
   2   4 -16    9.37    3.09
  -2  -4  16   39.57   14.56
   2  -4 -16   16.12    7.71
  -2   4  15  169.68    9.78
   2   4 -15  169.33    5.48
   2  -4 -15  206.34    5.64
   2   4 -14    6.69    4.46
  -2   4  14   12.86    8.13
   2  -4 -14    4.97    2.60
  -2  -4  14    8.73    3.55
   2  -4 -14    4.96    2.93
  -2  -4  14    7.57    6.19
   2   4 -13   63.46    6.69
  -2   4  13   57.01   16.17
  -2  -4  13   82.58   13.80
  -2  -4  13   68.87    4.78
   2  -4 -13   64.41    8.64
   2  -4 -13   61.21    6.35
   2   4 -12   14.82    4.29
  -2   4  12   35.51    8.86
  -2  -4  12   40.50   13.33
  -2  -4  12   26.83   11.22
   2  -4 -12   37.51   12.47
   2  -4 -12   27.90    3.57
   2   4 -11   72.06    5.63
  -2   4  11   54.97    5.75
   2  -4 -11   94.87    5.62
  -2  -4  11   67.04    9.36
   2  -4 -11   56.60   10.28
  -2  -4  11   94.94   10.30
  -2   4  10  320.87   11.72
  -2  -4  10  412.04   28.86
   2  -4 -10  432.95   16.55
  -2  -4  10  413.29   12.85
   2  -4 -10  349.73    7.31
   2   4  -9  199.38    9.34
  -2   4   9  113.04    8.05
  -2   4   9  151.20    8.09
  -2  -4   9  188.88    5.49
   2  -4  -9  162.30    5.02
  -2  -4   9  232.41   11.95
   2  -4  -9  176.20    6.07
   2   4  -8  270.67   10.90
  -2   4   8  157.21    8.54
  -2   4   8  211.42   10.26
  -2  -4   8  310.42   11.18
   2  -4  -8  234.65   10.06
  -2  -4   8  308.84   13.44
   2  -4  -8  222.40    8.35
   2   4  -7   39.38   17.39
  -2   4   7   26.47    8.45
   2  -4  -7   58.65   19.26
  -2  -4   7   40.96    5.94
   2  -4  -7   27.92    4.55
   2  -4  -7   29.76    4.35
  -2  -4   7   48.22   15.36
   2   4  -6   20.44   11.00
   2   4  -6   38.30    6.04
  -2   4   6   19.46    6.26
   2  -4  -6   20.04    4.37
  -2  -4   6   10.47    5.86
   2  -4  -6   28.36   16.50
   2  -4  -6   21.94    3.50
  -2  -4   6   32.85   17.42
  -2   4   5   47.99    8.44
   2   4  -5   45.66   17.02
   2   4  -5   52.03   12.99
   2  -4  -5   44.14    4.64
   2  -4  -5   65.03   23.49
  -2  -4   5   47.85    4.78
   2  -4  -5   57.63    7.35
  -2  -4   5   59.39   21.40
   2   4  -4  737.46   24.57
   2   4  -4  753.66   20.67
  -2   4   4  493.53   16.54
   2  -4  -4  482.23   13.36
   2  -4  -4  798.30   21.22
  -2  -4   4  729.68   19.93
  -2  -4   4  772.65   21.66
   2   4  -3  209.76   11.59
  -2   4   3  211.95   10.64
  -2   4   3  160.97   13.12
   2   4  -3  205.23   20.81
  -2  -4   3  203.38   11.39
   2  -4  -3  231.79   13.50
   2  -4  -3  148.83    9.99
  -2  -4   3  220.36   12.84
   2   4  -2   83.11    6.31
  -2   4   2   88.46    6.28
  -2   4   2   56.69    7.05
   2   4  -2   71.88    7.71
   2  -4  -2   85.46    9.67
  -2  -4   2   73.48    6.05
   2  -4  -2   62.17    5.61
  -2  -4   2   83.02    8.03
  -2   4   1   14.41    6.76
  -2   4   1   12.05    4.39
   2   4  -1   16.66    6.91
  -2  -4   1   12.34    5.15
  -2  -4   1   20.74    8.89
  -2  -4   1   17.35    5.00
   2  -4  -1    8.73    4.98
   2  -4  -1   18.18    7.47
   2   4   0 1116.55   29.49
  -2   4   0 1115.99   28.24
  -2   4   0  747.10   21.52
  -2  -4   0  738.88   20.20
  -2  -4   0 1212.07   31.22
  -2  -4   0 1106.23   28.45
   2  -4   0 1139.80   29.85
   2   4   1  908.27   24.21
  -2   4  -1  919.64   24.81
  -2   4  -1  614.04   19.08
  -2  -4  -1  656.20   18.82
  -2  -4  -1 1049.10   27.68
  -2  -4  -1  934.93   32.65
   2  -4   1  994.31   28.21
  -2   4  -2 3713.94   89.56
   2   4   2 3740.14   91.62
  -2   4  -2 2372.72   63.61
  -2  -4  -2 2795.55   68.20
  -2  -4  -2 3831.46   92.57
   2  -4   2 3959.62   96.34
  -2   4  -3  211.43   13.66
   2   4   3  203.45   12.49
   2   4   3  339.54   31.69
   2  -4   3  260.85   14.44
  -2  -4  -3  340.22   16.46
   2  -4   3  298.99   34.34
  -2   4  -4 1429.91   39.30
   2   4   4 1666.28   46.05
   2  -4   4 2296.40   61.65
   2  -4   4 1835.40   50.51
  -2  -4  -4 2312.20   61.48
  -2   4  -5   -2.73    5.89
   2   4   5   -1.57    8.27
   2   4   5   -1.45    5.92
   2  -4   5    0.48    4.70
  -2  -4  -5    5.35    3.88
   2  -4   5    2.76    4.01
  -2   4  -6  497.25   20.50
   2   4   6  570.26   25.06
   2   4   6  679.60   26.33
  -2  -4  -6  752.57   29.12
   2  -4   6  627.82   24.33
   2  -4   6  824.38   33.15
  -2   4  -7   49.97    7.37
   2   4   7   61.44    7.87
   2   4   7   57.27    6.52
   2  -4   7   62.18    6.16
  -2  -4  -7   73.49    9.60
   2  -4   7   65.15   26.60
  -2   4  -8   61.48    7.81
   2   4   8   66.57    7.72
   2   4   8   89.88    7.34
   2  -4   8   88.79    6.06
  -2  -4  -8   91.68    6.18
   2  -4   8  109.63   33.15
  -2   4  -9   13.43    5.05
   2   4   9    9.21    6.53
   2   4   9   23.02    4.64
  -2  -4  -9   22.73    6.50
   2  -4   9   20.61    6.46
   2  -4   9   15.93    9.59
  -2   4 -10  145.16    6.98
   2   4  10  253.99    9.43
   2   4  10  231.55   10.75
   2  -4  10  273.43    9.27
  -2  -4 -10  303.80    9.38
   2  -4  10  333.36   14.41
   2   4  11    3.79    3.35
   2   4  11   15.62   11.06
   2  -4  11   23.24   11.07
   2  -4  11   19.37    3.93
   2  -4  11   15.14    6.82
   2   4  12   94.02    5.38
   2   4  12  122.63   13.49
   2  -4  12  147.29   47.59
  -2  -4 -12  131.11    4.86
   2  -4  12  145.40    6.38
   2   4  13   14.85   10.49
   2   4  13    9.48    4.40
   2  -4  13   13.45    7.31
   2  -4  13   11.96    4.95
   2   4  14   18.64   11.01
   2   4  14    5.20    2.15
   2  -4  14   20.14   11.02
   2  -4  14   12.33    4.52
   2   4  15   63.93   20.64
   2  -4  15  103.55   27.04
   2   4  16   10.52    6.54
   2  -4  16    5.74    6.36
   2   4  17  111.37   14.61
   2  -4  17  123.65   42.47
   2   4  18   39.06   14.38
   2  -4  18   17.22    9.85
   2   4  19   38.08   14.92
   2  -4  19   24.17   10.17
   2   4  20   -3.78    9.46
   2  -4  20    5.15    8.95
  -2   5  22   25.69    8.04
  -2  -5  22   26.30    7.92
  -2   5  21   23.43    8.64
  -2  -5  21   37.92   12.08
  -2   5  20    9.74    8.05
  -2  -5  20    8.18    6.40
  -2   5  19    7.03    6.15
  -2  -5  19    5.53    4.84
  -2   5  18    1.26    5.84
  -2  -5  18   10.38    7.58
  -2   5  17   10.83    6.05
  -2  -5  17    9.65    3.14
  -2   5  16    5.10    6.85
   2   5 -16    7.85    3.87
  -2  -5  16   -6.45    8.04
   2  -5 -16   -0.05    2.22
  -2   5  15   15.68    6.25
   2   5 -15    6.79    3.48
  -2  -5  15   18.42   10.99
   2  -5 -15   13.61    6.45
  -2   5  14    3.82    5.85
   2   5 -14    6.51    4.02
  -2  -5  14   14.05    5.69
   2  -5 -14    3.68    3.15
  -2   5  13   48.57    7.43
   2   5 -13   44.68    6.86
  -2  -5  13   43.65   10.83
   2  -5 -13   51.36   19.01
  -2   5  12   10.44    6.07
   2   5 -12    4.54    4.91
  -2  -5  12    3.55    8.27
   2  -5 -12    4.44    3.57
   2   5 -11   33.10    6.86
  -2   5  11   21.56    5.78
  -2   5  11   12.89    4.24
  -2  -5  11   34.72   22.57
   2   5 -10   23.62    9.44
  -2   5  10   23.61    6.03
  -2   5  10   23.00    6.64
  -2  -5  10   41.72    7.20
   2   5  -9  223.96   12.17
  -2   5   9  130.23    9.44
   2  -5  -9  281.85   13.37
  -2  -5   9  260.37   13.38
   2   5  -8  150.58    8.69
  -2   5   8   94.78    8.38
   2  -5  -8  170.92   19.36
  -2  -5   8  159.55    9.41
   2   5  -7   65.77   21.06
  -2   5   7   34.74    8.70
   2  -5  -7   72.33    5.50
  -2  -5   7   74.69    8.72
   2   5  -6  122.03   14.70
  -2   5   6   85.18    9.25
   2  -5  -6  137.88   10.52
  -2  -5   6  142.22   21.97
   2   5  -5  288.43   13.13
  -2   5   5  201.00   11.92
   2  -5  -5  341.33   12.65
  -2  -5   5  321.30   13.84
  -2   5   4   11.31    7.27
   2   5  -4   34.07   16.40
   2  -5  -4   27.43   11.45
  -2  -5   4   39.85    7.83
   2  -5  -4   15.57    4.38
  -2   5   3   20.93    8.48
   2   5  -3    8.68    8.57
  -2   5   3   13.57    8.35
   2  -5  -3   10.63    6.24
  -2  -5   3   37.16    9.60
   2   5  -2  650.11   27.62
  -2   5   2  444.38   20.38
   2  -5  -2  746.89   29.39
  -2  -5   2  717.34   29.53
   2   5  -1  120.48    9.11
  -2   5   1   76.69    8.27
  -2  -5   1  153.43   11.24
   2  -5  -1  126.23   10.20
   2   5   0 1671.31   52.88
  -2   5   0 1156.72   33.47
  -2  -5   0 1940.99   55.52
   2  -5   0 1885.91   51.66
   2   5   1  673.47   27.60
  -2   5  -1  493.09   22.77
  -2  -5  -1  840.75   33.41
   2  -5   1  771.13   31.15
   2   5   2 2228.46   60.11
  -2   5  -2 1569.92   43.96
  -2  -5  -2 2550.04   68.79
   2  -5   2 2512.21   67.78
   2   5   3 2591.74   69.56
  -2   5  -3 1920.97   55.59
  -2  -5  -3 3361.34   89.82
   2  -5   3 3011.37   80.89
   2   5   4  358.63   16.82
   2   5   4  259.18   15.66
  -2   5  -4  251.13   12.82
   2  -5   4  369.48   28.84
   2   5   5 1106.61   35.56
   2   5   5  900.21   30.59
  -2   5  -5  786.89   26.35
   2  -5   5 1318.44   42.58
   2   5   6   24.10    5.95
   2   5   6   19.49    8.66
  -2   5  -6   10.21    5.65
   2  -5   6   24.26    8.70
   2   5   7   76.00    9.05
   2   5   7   66.50   10.47
  -2   5  -7   48.15    7.40
   2  -5   7  107.14   34.05
   2   5   8   61.09   10.35
   2   5   8   65.53   17.99
  -2   5  -8   43.76    7.86
   2  -5   8  108.68   34.43
   2   5   9  134.38    8.02
   2   5   9  135.83   12.31
  -2   5  -9   98.02    8.53
   2  -5   9  182.67   15.18
   2   5  10  235.45    9.91
   2   5  10  239.15   10.36
  -2   5 -10  184.89   10.49
   2  -5  10  341.47   18.37
   2   5  11  141.73    7.40
   2   5  11  146.42   14.60
  -2   5 -11  106.73    8.26
   2  -5  11  215.19   14.44
   2   5  12  112.16   16.68
   2   5  12  141.37   14.19
  -2   5 -12   93.26    5.97
   2  -5  12  195.05   41.91
   2   5  13    3.59   10.72
   2   5  13   -2.69    3.41
   2  -5  13   -0.10   10.31
   2  -5  13    2.60    3.71
   2   5  14   59.18   14.24
   2   5  14   22.97    4.30
   2  -5  14   53.42   10.15
   2  -5  14   34.43   10.42
   2   5  15   10.73    9.52
   2  -5  15   16.41    7.07
   2   5  16   -7.55    9.70
   2  -5  16    6.00    7.13
   2   5  17   30.76    9.98
   2  -5  17   51.60   12.10
   2   5  18   68.06   14.60
   2  -5  18   61.03   21.58
   2   5  19    8.90    9.53
   2  -5  19    4.44    8.94
   2   5  20   16.14    9.17
   2  -5  20   13.47    9.77
  -2   6  21   27.67    8.40
  -2  -6  21   39.00    8.38
  -2   6  20    5.18    6.51
  -2  -6  20    8.47    3.78
  -2   6  19    6.98    6.77
  -2  -6  19    3.51    8.29
  -2   6  18    3.46    5.86
  -2  -6  18   -3.34    8.45
  -2   6  17    4.32    5.71
  -2  -6  17   12.12    8.55
   2   6 -16   30.21    6.16
  -2   6  16   13.07    6.35
  -2  -6  16   35.59   10.39
  -2   6  15   -1.20    6.40
   2   6 -15    7.61    4.47
  -2  -6  15   -1.07    8.11
   2  -6 -15    1.53    2.34
  -2   6  14   41.86   10.67
   2   6 -14   44.17    8.72
  -2  -6  14   64.73   18.76
   2  -6 -14   62.68   14.38
  -2   6  13   12.97    8.38
   2   6 -13    2.07    6.02
  -2  -6  13   17.57   11.51
   2  -6 -13    7.50    4.46
  -2   6  12    1.40    3.74
   2   6 -12    4.42    6.59
  -2  -6  12    0.47    5.89
   2   6 -11  233.59   10.77
  -2   6  11  150.47    8.90
   2  -6 -11  293.32   21.95
  -2  -6  11  269.55   13.15
   2   6 -10   26.06   10.86
  -2   6  10    9.10    8.16
   2  -6 -10   13.48    6.90
  -2  -6  10   27.09    7.25
   2   6  -9  160.73   10.70
  -2   6   9  120.67    9.41
   2  -6  -9  230.24   10.90
  -2  -6   9  215.90   16.02
   2   6  -8  123.31   11.47
  -2   6   8   98.59    9.81
   2  -6  -8  175.66   11.23
  -2  -6   8  163.09    9.37
   2   6  -7   13.13   16.89
  -2   6   7    7.96    7.60
   2  -6  -7   27.16   13.70
  -2  -6   7   24.73    7.84
   2   6  -6  632.57   27.77
  -2   6   6  445.03   16.55
   2  -6  -6  844.67   24.92
  -2  -6   6  824.70   25.09
   2   6  -5  190.25   12.67
  -2   6   5  135.18    9.92
   2  -6  -5  244.69   12.52
  -2  -6   5  228.87   13.60
   2   6  -4  196.40   12.85
  -2   6   4  153.79   12.13
   2  -6  -4  247.13   16.29
  -2  -6   4  234.96   12.16
   2   6  -3  198.82   11.39
  -2   6   3  145.68   12.55
  -2  -6   3  237.69   13.87
   2  -6  -3  235.99   10.77
   2   6  -2  429.49   24.86
  -2   6   2  305.94   16.10
  -2  -6   2  482.60   20.05
   2  -6  -2  458.37   16.66
   2   6  -1   45.07    8.35
  -2   6   1    6.45    8.53
  -2  -6   1   59.04   25.22
   2  -6  -1   60.65    9.23
   2   6   0 2100.92   65.37
  -2   6   0 1600.34   51.24
  -2  -6   0 2540.07   78.41
   2  -6   0 2400.09   81.56
   2   6   1  699.96   25.64
  -2   6  -1  512.33   19.70
  -2  -6  -1  926.41   31.14
   2  -6   1  835.54   36.80
   2   6   2 1141.81   37.24
  -2   6  -2  829.62   28.32
  -2  -6  -2 1412.11   45.33
   2  -6   2 1264.24   40.85
   2   6   3 1188.95   39.94
  -2   6  -3  927.88   30.70
  -2  -6  -3 1584.09   55.87
   2  -6   3 1467.39   46.75
   2   6   4   -0.16    7.72
  -2   6  -4    2.96    6.63
  -2  -6  -4    0.36    6.06
   2  -6   4   -3.57    7.74
  -2   6  -5  708.84   22.24
   2   6   5  916.21   27.19
   2  -6   5 1174.53   35.38
   2   6   6    7.49    6.60
   2   6   6   20.78   12.52
  -2   6  -6    5.52    6.21
   2  -6   6   10.04    8.26
   2   6   7  541.38   34.47
   2   6   7  480.14   40.48
  -2   6  -7  419.06   17.55
   2  -6   7  730.76   27.91
   2   6   8   62.19    7.53
   2   6   8   66.30   11.24
  -2   6  -8   56.77   12.24
   2  -6   8   78.10    9.32
   2   6   9  317.79   13.71
   2   6   9  291.93   17.67
  -2   6  -9  237.86   11.79
   2  -6   9  433.61   20.11
   2   6  10   47.04    7.30
   2   6  10   60.12   12.38
  -2   6 -10   47.67   10.47
   2  -6  10   85.92   26.57
   2   6  11  123.86    6.96
   2   6  11  140.79   10.22
  -2   6 -11   98.01    8.06
   2  -6  11  229.59   24.94
   2   6  12   43.15   13.76
   2   6  12   51.86    9.62
  -2   6 -12   41.01    6.41
   2  -6  12   73.95   23.56
   2   6  13    3.01    2.66
   2   6  13   18.47   13.19
  -2   6 -13    3.01    4.83
   2  -6  13   14.79   15.29
   2   6  14   17.88   10.30
   2   6  14    4.83    3.26
   2  -6  14   12.74    8.29
   2  -6  14    6.55    2.64
   2   6  15    9.62    9.59
   2  -6  15   16.73   12.86
   2   6  16   15.38   11.02
   2  -6  16   16.39   14.10
   2   6  17    9.15    6.50
   2  -6  17   17.32   11.73
   2   6  18   32.91   14.39
   2  -6  18   44.19   14.14
   2   6  19   -2.20    9.09
   2  -6  19   -3.13    8.81
  -2   7  20    1.42    1.70
  -2  -7  20   15.00   12.41
  -2   7  19   -1.84    6.57
  -2  -7  19    4.21    6.55
  -2   7  18    2.29    6.67
  -2  -7  18    3.15    9.39
  -2   7  17    4.79    6.39
  -2  -7  17    2.85    5.90
   2   7 -16    2.63    4.85
  -2  -7  16    9.89    9.03
   2  -7 -16   -0.12    5.89
   2   7 -15    6.01    5.18
   2  -7 -15   -4.28    7.21
   2  -7 -15    6.74    5.97
  -2  -7  15   -5.22    9.20
   2   7 -14   46.39   16.08
   2  -7 -14   75.56   22.36
   2  -7 -14   51.82   20.89
  -2  -7  14   64.64   20.49
   2   7 -13   18.07   10.16
  -2   7  13    6.08    5.35
   2  -7 -13    5.80    5.09
  -2  -7  13    9.09    9.39
   2   7 -12   79.71   10.49
  -2   7  12   30.64    6.22
   2  -7 -12   89.30   30.30
  -2  -7  12  110.37   10.17
   2   7 -11   67.76   11.04
  -2   7  11   52.14    8.12
   2  -7 -11   96.59   17.82
  -2  -7  11   91.27   12.12
   2   7 -10   41.50   25.18
  -2   7  10   43.97    8.86
   2  -7 -10   64.09   32.84
  -2  -7  10   52.92    8.13
   2   7  -9   76.57   11.35
  -2   7   9   52.86    9.78
   2  -7  -9   98.78   35.79
  -2  -7   9   82.70   27.30
   2   7  -8  287.79   15.94
  -2   7   8  210.20   13.64
   2  -7  -8  338.18   16.07
  -2  -7   8  341.84   12.70
   2   7  -7   19.86    9.58
  -2   7   7   18.86    8.48
   2  -7  -7   14.58    8.92
  -2  -7   7   20.75   12.56
   2   7  -6  403.25   17.97
  -2   7   6  288.03   15.74
   2  -7  -6  502.43   20.26
  -2  -7   6  452.26   20.29
   2   7  -5   -4.39    8.50
  -2   7   5   -4.94    7.56
   2  -7  -5   -2.77    7.38
  -2  -7   5    8.96    6.40
   2   7  -4   79.32    8.55
  -2   7   4   66.12    9.91
  -2  -7   4  111.04   13.12
   2  -7  -4   95.38   11.79
   2   7  -3  273.32   16.51
  -2   7   3  211.24   15.29
  -2  -7   3  367.07   24.92
   2  -7  -3  363.03   18.49
   2   7  -2   83.63   11.83
  -2   7   2   50.03    9.22
  -2  -7   2   82.57   33.17
   2  -7  -2   92.11    9.32
   2   7  -1  412.44   17.93
  -2   7   1  238.97   39.20
  -2  -7   1  528.30   19.24
   2  -7  -1  541.42   18.69
   2   7   0  140.02   13.21
  -2   7   0  117.40   13.17
  -2  -7   0  180.41   14.40
   2  -7   0  190.85   22.04
   2   7   1  325.60   18.56
  -2   7  -1  290.06   14.89
  -2  -7  -1  447.14   22.06
   2  -7   1  435.66   18.44
   2   7   2   15.46    8.36
  -2   7  -2   -2.02    8.47
  -2  -7  -2    9.30    8.14
   2  -7   2    3.23    4.28
   2   7   3  398.70   17.53
  -2   7  -3  315.75   15.95
  -2  -7  -3  531.18   26.25
   2  -7   3  466.84   17.81
   2   7   4   28.92   12.16
  -2   7  -4    5.53    8.44
  -2  -7  -4   17.65    7.46
   2  -7   4    6.18   10.67
   2   7   5  760.44   26.85
  -2   7  -5  556.55   22.01
  -2  -7  -5 1083.17   35.05
   2  -7   5  937.09   30.69
   2   7   6   46.69   11.48
  -2   7  -6   12.10   10.46
  -2  -7  -6   34.27   15.51
   2  -7   6   44.83   11.60
   2   7   7  659.68   23.52
  -2   7  -7  511.76   20.49
  -2  -7  -7  926.26   31.28
   2  -7   7  899.79   30.28
   2   7   8   23.47    6.08
   2   7   8   24.19    9.01
  -2   7  -8   18.91   12.36
   2  -7   8   29.74    8.68
   2   7   9  165.19   10.76
   2   7   9  134.16    9.92
  -2   7  -9  143.30   11.06
   2  -7   9  223.14   11.27
  -2   7 -10    9.47    7.53
   2   7  10    7.41    9.06
   2   7  10    6.10    5.83
   2  -7  10   -3.39   10.59
   2   7  11   34.16    7.44
   2   7  11   39.33    9.27
  -2   7 -11   29.89    8.66
   2  -7  11   70.71   17.38
   2   7  12   33.37    7.85
   2   7  12   27.63    9.99
  -2   7 -12   31.81    7.65
   2  -7  12   45.04   13.47
   2   7  13    4.23    3.89
   2   7  13   14.61    9.49
  -2   7 -13    4.19    4.85
   2  -7  13    7.08   12.56
   2   7  14    1.53    3.62
   2   7  14   -8.21    9.96
  -2   7 -14    0.82    4.96
   2  -7  14    5.11    8.21
   2   7  15   22.46   11.07
   2  -7  15   10.70   14.03
   2   7  16    3.79   10.46
   2  -7  16   -5.43   10.49
   2   7  17    8.83    9.98
   2  -7  17   19.08   11.02
   2   7  18   20.22    9.03
   2  -7  18   41.43   16.48
   2  -8 -19    1.40    2.10
  -2  -8  19    7.98    6.26
   2  -8 -18   -1.34    5.06
  -2  -8  18    7.66   10.53
   2  -8 -17    0.48    2.33
  -2  -8  17    3.78    5.02
   2   8 -16    9.24    7.84
  -2  -8  16    4.73    4.94
   2  -8 -16    6.84    6.11
   2   8 -15   47.94    9.26
   2  -8 -15   41.55   15.79
   2  -8 -15   32.80   12.34
  -2  -8  15   46.99   13.25
   2   8 -14   32.76    7.52
  -2  -8  14   24.54    9.19
   2  -8 -14   12.65    8.33
   2   8 -13  149.03   10.97
  -2   8  13  110.26   10.90
   2  -8 -13  224.23   17.80
  -2  -8  13  204.57   57.16
   2   8 -12  177.20   12.98
  -2   8  12  124.05   11.69
   2  -8 -12  228.02   31.71
  -2  -8  12  232.03   20.81
   2   8 -11  104.85   12.18
  -2   8  11   79.65    8.55
   2  -8 -11  149.53   10.39
  -2  -8  11  133.43   12.56
   2   8 -10  160.77   14.10
  -2   8  10  135.21   11.08
   2  -8 -10  221.92   24.11
  -2  -8  10  250.55   13.41
   2   8  -9   18.50   14.13
  -2   8   9    8.87    8.27
   2  -8  -9   11.60    5.33
  -2  -8   9   24.12   10.81
   2   8  -8  191.23   15.00
  -2   8   8  153.26   12.65
   2  -8  -8  248.12   26.18
  -2  -8   8  227.62   30.75
   2   8  -7   26.94   11.21
  -2   8   7    6.62    9.15
   2  -8  -7   19.14   13.10
  -2  -8   7   16.18   10.45
   2   8  -6   92.44   10.78
  -2   8   6   69.37   22.07
  -2  -8   6  116.41   32.06
   2  -8  -6  126.13   16.04
   2   8  -5   72.37   13.17
  -2   8   5   45.52   12.20
   2  -8  -5   80.65   12.87
  -2  -8   5   84.33   10.36
   2   8  -4    8.86    9.93
  -2   8   4   -1.99   10.15
  -2  -8   4   14.92    6.40
   2  -8  -4    4.24    8.64
   2   8  -3    5.66    9.45
  -2   8   3   -5.14   10.42
   2  -8  -3    4.67    4.67
  -2  -8   3   -2.84    9.53
   2   8  -2   -3.64    8.96
  -2   8   2    6.08    9.13
   2  -8  -2   -0.73    8.13
  -2  -8   2   -0.81    9.27
   2   8  -1  212.00   15.31
  -2   8   1  109.86   44.19
  -2  -8   1  298.64   14.53
   2  -8  -1  270.85   17.75
   2   8   0   40.11   14.10
  -2   8   0   14.37   20.71
  -2  -8   0   34.30    8.82
   2  -8   0   28.44    8.32
   2   8   1  226.13   16.29
  -2   8  -1  158.90   17.42
  -2  -8  -1  292.37   16.12
   2  -8   1  260.02   14.90
   2   8   2   85.21   12.24
  -2   8  -2   69.65   33.35
  -2  -8  -2  124.31   10.03
   2  -8   2  132.49   14.15
   2   8   3  122.00   25.82
  -2   8  -3  116.72   14.81
  -2  -8  -3  195.74   11.23
   2  -8   3  167.64   16.41
   2   8   4    6.74    9.01
  -2   8  -4    3.46    5.50
  -2  -8  -4    8.24    7.25
   2  -8   4   15.34    8.53
   2   8   5  498.35   22.33
  -2   8  -5  386.43   19.47
  -2  -8  -5  718.20   26.14
   2  -8   5  706.14   25.98
   2   8   6   12.33    9.01
  -2   8  -6   10.26    5.83
  -2  -8  -6   10.93    9.18
   2  -8   6   20.28    9.96
   2   8   7  492.95   26.36
  -2   8  -7  437.86   23.50
  -2  -8  -7  725.84   49.18
   2  -8   7  678.18   32.06
   2   8   8    6.39    6.65
  -2   8  -8    1.99   10.36
  -2  -8  -8    2.96    8.44
   2  -8   8   11.69    9.43
   2   8   9   84.27    8.59
  -2   8  -9   61.18    8.27
  -2  -8  -9  129.71   16.11
   2  -8   9  117.66   11.06
   2   8  10   53.58    9.29
  -2   8 -10   62.87   11.17
  -2  -8 -10   89.73   33.64
   2  -8  10  112.71   10.28
  -2   8 -11    8.22    6.75
   2   8  11   -6.49    5.66
   2  -8  11    0.64    8.09
   2   8  12   83.78    9.68
   2   8  12   86.33   10.89
  -2   8 -12   59.74    9.41
   2  -8  12  112.06   38.76
   2   8  13    2.63    4.26
   2   8  13   17.30   10.39
  -2   8 -13   -0.77    5.34
   2  -8  13   16.39    8.49
  -2   8 -14    2.40    4.56
   2   8  14   14.50   11.84
   2  -8  14   14.90   15.40
   2   8  15    4.08    9.47
   2  -8  15   15.76   10.63
   2   8  16   15.95    9.91
   2  -8  16    7.70    4.79
   2   8  17    6.56    8.80
   2  -8  17    5.28   11.92
   2  -9 -18    6.66    4.80
  -2  -9  18    9.25    8.97
   2  -9 -17   16.76   10.28
  -2  -9  17    7.74    6.41
   2   9 -16    1.28    5.94
  -2  -9  16    1.11    6.11
   2  -9 -16    0.73    6.72
   2   9 -15  125.57    9.53
   2  -9 -15  206.25   11.90
   2  -9 -15  199.72   11.32
  -2  -9  15  167.61   10.76
   2   9 -14    2.74    5.83
  -2   9  14   -0.35    6.20
   2  -9 -14   10.15    8.80
  -2  -9  14    5.86    5.80
   2   9 -13  203.30   11.83
  -2   9  13  152.34    9.80
   2  -9 -13  358.27   13.86
  -2  -9  13  352.85   16.57
  -2   9  12   23.32    9.41
   2   9 -12   17.28    8.08
   2  -9 -12   23.07   12.86
  -2  -9  12   29.97    9.12
   2   9 -11   69.64   22.38
  -2   9  11   82.11   12.77
   2  -9 -11  140.21   12.39
  -2  -9  11  116.09   10.29
   2   9 -10  109.30   15.25
  -2   9  10   86.07   11.45
   2  -9 -10  147.88   12.06
  -2  -9  10  162.65   21.30
   2   9  -9   40.55   13.55
  -2   9   9   33.58    8.52
   2  -9  -9   51.07   15.71
  -2  -9   9   52.19   20.02
   2   9  -8  247.18   16.86
  -2   9   8  182.07   14.93
   2  -9  -8  371.95   19.30
  -2  -9   8  338.44   42.13
   2   9  -7  109.82   16.14
  -2   9   7   96.62   13.55
   2  -9  -7  137.96   17.14
  -2  -9   7  144.01   15.40
   2   9  -6  140.58   17.05
  -2   9   6   94.70   15.65
  -2  -9   6  189.95   13.46
   2  -9  -6  190.32   29.57
   2   9  -5  111.10   16.09
  -2   9   5   83.52   13.66
   2  -9  -5  154.63   31.36
  -2  -9   5  130.15   38.36
   2   9  -4    4.47   10.24
  -2   9   4    2.83    7.30
   2  -9  -4    5.07    6.67
  -2  -9   4    6.66    6.34
   2   9  -3    7.87   10.83
  -2   9   3   17.48   10.90
  -2  -9   3   -1.25    9.17
   2  -9  -3   27.09   10.31
   2   9  -2   20.87    9.72
  -2   9   2    9.57    9.11
  -2  -9   2    7.18    7.80
   2  -9  -2    0.87    5.50
   2   9  -1   42.85   13.24
  -2   9   1   20.90   17.29
   2  -9  -1   38.15   22.28
  -2  -9   1   67.50    9.50
   2   9   0   10.67   10.12
  -2   9   0   -1.64    6.51
  -2  -9   0    6.45    9.44
   2  -9   0   33.28   14.27
   2   9   1  118.34   15.37
  -2   9  -1   86.74   27.85
  -2  -9  -1  174.40   10.27
   2  -9   1  128.92   44.56
   2   9   2    6.60   10.39
  -2   9  -2    9.35   10.14
  -2  -9  -2    6.16    5.79
   2  -9   2   -4.98    9.98
   2   9   3   78.41   12.68
  -2   9  -3   59.58   13.17
  -2  -9  -3  121.15   14.44
   2  -9   3  104.98   38.60
   2   9   4   -2.43    9.03
  -2   9  -4   -0.11   11.31
  -2  -9  -4  -14.59    9.88
   2  -9   4  -11.20   10.76
   2   9   5   78.27   13.31
  -2   9  -5   54.66   23.48
  -2  -9  -5  121.39   18.18
   2  -9   5  102.99   39.42
   2   9   6   12.23    6.59
  -2   9  -6   35.33   13.50
  -2  -9  -6   21.40   12.19
   2  -9   6   21.43   17.16
   2   9   7  128.70    9.41
  -2   9  -7  126.19   35.93
  -2  -9  -7  218.00   17.19
   2  -9   7  220.51   16.30
  -2   9  -8   10.60   14.23
   2   9   8   36.89   12.22
  -2  -9  -8   44.89   12.57
   2  -9   8   23.92   10.97
  -2   9  -9   44.43   11.46
   2   9   9   63.69    9.61
  -2  -9  -9   82.86   35.59
  -2   9 -10    7.68    8.16
   2   9  10   35.44    9.92
  -2  -9 -10   26.18   11.53
   2  -9  10   21.02   10.64
   2   9  11   10.39    7.39
  -2   9 -11    0.72    7.24
  -2  -9 -11   -1.85    9.11
   2  -9  11   -1.30    9.67
  -2   9 -12   13.36    5.61
   2   9  12    4.74    5.39
  -2  -9 -12   -0.05    8.78
   2  -9  12    3.62    6.35
   2   9  13    3.84    5.69
  -2   9 -13   -4.86    5.83
  -2  -9 -13   16.28    9.72
   2  -9  13    5.00    6.10
  -2  -9 -14   13.41   11.15
   2  -9  14   12.18    9.90
  -2  -9 -15   21.81   13.93
   2  -9  15   31.93   14.34
  -2  -9 -16   18.77   12.41
   2  -9  16   21.42   10.85
   2 -10 -16   -3.29    6.13
  -2 -10  16    4.49    4.22
   2  10 -15   42.02   18.68
   2 -10 -15  137.64   18.20
   2 -10 -15   61.32   26.65
  -2 -10  15   82.92   31.87
   2  10 -14    4.27    7.44
  -2  10  14    7.09    6.90
   2 -10 -14   10.67    8.07
  -2 -10  14   14.66    8.89
   2  10 -13   88.14   11.89
  -2  10  13   69.00   10.94
   2 -10 -13  159.33   12.17
  -2 -10  13  123.70   29.82
  -2  10  12    6.06    7.06
   2  10 -12   24.72   10.65
   2 -10 -12    5.44    5.27
  -2 -10  12    6.11    9.24
   2  10 -11   21.22   11.57
  -2  10  11   38.55   10.15
   2 -10 -11   56.71   27.41
  -2 -10  11   61.25   26.71
   2  10 -10   14.83   10.34
  -2  10  10    0.33    8.35
   2 -10 -10   15.76    9.24
  -2 -10  10   16.28    8.74
   2  10  -9   57.81   21.05
  -2  10   9   59.27   13.41
   2 -10  -9  111.87   24.33
  -2 -10   9   79.88   20.27
   2  10  -8   62.79   24.51
  -2  10   8   66.60   14.51
   2 -10  -8   94.19   13.57
  -2 -10   8   68.64   22.20
   2  10  -7  207.42   21.02
  -2  10   7  162.72   15.41
   2 -10  -7  294.31   19.50
  -2 -10   7  312.01   18.09
   2  10  -6   11.77   11.85
  -2  10   6   16.59    9.16
  -2 -10   6   17.88    9.96
   2 -10  -6    3.51    9.33
   2  10  -5  187.48   16.10
  -2  10   5  123.19   27.95
   2 -10  -5  235.12   11.48
  -2 -10   5  277.00   17.71
   2  10  -4   21.91   16.08
  -2  10   4   32.63   12.37
  -2 -10   4   29.51   14.31
   2 -10  -4   36.89    9.87
   2  10  -3   21.56   12.07
  -2  10   3   20.38   11.16
  -2 -10   3   24.45   11.46
   2 -10  -3   44.26   11.17
   2  10  -2    6.95   10.97
  -2  10   2   18.81   10.07
  -2 -10   2   20.81   11.46
   2 -10  -2   30.09   19.87
   2  10  -1   24.15   14.33
  -2  10   1   12.15    9.63
   2 -10  -1   12.54   10.87
  -2 -10   1   13.03    9.85
   2  10   0   13.24   10.09
  -2  10   0    0.92    8.69
   2 -10   0   16.89   10.93
  -2 -10   0    8.85   10.57
   2  10   1  100.76   17.16
  -2  10  -1   51.61   15.36
   2 -10   1  110.63   15.62
  -2 -10  -1  104.08   37.68
   2  10   2   13.21   12.22
  -2  10  -2   21.25   10.59
  -2 -10  -2   32.36   18.41
   2 -10   2   39.78   10.55
  -2  10  -3   44.66   17.01
   2 -10   3   69.75   15.52
  -2 -10  -3   75.33   18.27
   2  10   4    8.20    9.02
  -2  10  -4    3.59   12.40
  -2 -10  -4    2.70    9.67
   2 -10   4    8.98   10.93
   2  10   5    4.87    6.38
  -2  10  -5    9.55   11.26
  -2 -10  -5    6.63    9.57
   2 -10   5    2.92    6.62
   2  10   6   48.27   10.24
  -2  10  -6   34.50   15.85
  -2 -10  -6   60.93   19.02
   2 -10   6   76.11   12.03
  -2  10  -7    3.52    9.30
   2  10   7    7.99    8.40
  -2 -10  -7   -0.63    7.52
   2 -10   7   18.45   16.22
   2  10   8   48.59   11.74
  -2  10  -8   37.64    9.86
  -2 -10  -8   62.02   20.13
   2 -10   8   82.53   17.54
  -2  10  -9    7.50    8.11
   2  10   9    2.46    7.10
  -2 -10  -9   -2.91   10.23
   2 -10   9    8.22    7.41
  -2  10 -10    4.27    7.62
   2  10  10    2.69    7.26
  -2 -10 -10    6.29   10.09
   2 -10  10   -2.25   11.21
  -2  10 -11   -8.59    7.12
   2  10  11    7.31    6.93
  -2 -10 -11   -0.83    5.42
   2 -10  11    6.15   11.93
   2  10  12   -2.33    6.83
  -2  10 -12   -0.80    6.60
  -2 -10 -12    8.04    9.53
   2 -10  12    9.19   11.33
  -2  10 -13    2.46    5.61
   2  10  13   11.43    7.93
  -2 -10 -13    4.53    5.77
   2 -10  13   11.95    9.04
  -2 -10 -14   -4.05    8.41
   2 -10  14    5.38    6.57
   2  11 -14   12.36    7.25
  -2  11  14    6.56    6.02
   2 -11 -14    2.98    6.64
  -2 -11  14   16.14   11.86
  -2  11  13   18.62    7.53
   2  11 -13   66.94   10.84
   2 -11 -13   73.84   10.79
   2  11 -12   16.90    8.06
  -2  11  12   20.24    8.49
   2 -11 -12   24.28   10.83
  -2 -11  12   27.77   10.87
  -2  11  11   77.06   12.27
   2  11 -11  106.46   12.28
   2 -11 -11  206.77   12.13
  -2 -11  11  163.22   33.91
  -2  11  10    3.85    9.20
   2  11 -10    4.25    9.22
   2 -11 -10    1.68    7.01
  -2 -11  10    8.16    9.86
   2  11  -9  144.58   13.42
  -2  11   9   99.96   13.36
   2 -11  -9  221.65   12.53
  -2 -11   9  230.25   12.90
  -2  11   8   -1.96    9.64
   2  11  -8   -1.79    9.57
   2 -11  -8    2.74    4.42
  -2 -11   8    9.11    9.49
   2  11  -7   52.09   19.74
  -2  11   7   50.61   13.74
   2 -11  -7   64.15   27.89
  -2 -11   7   91.57   14.79
   2  11  -6    0.89    6.82
  -2  11   6    2.96    8.66
   2 -11  -6   -2.78    8.94
  -2 -11   6   17.15    9.94
   2  11  -5    6.41   10.86
  -2  11   5   12.61   11.03
   2 -11  -5    9.07    8.63
  -2 -11   5    7.56   10.07
   2  11  -4    8.27   10.26
  -2  11   4    1.34   11.54
   2 -11  -4   17.74    9.29
  -2 -11   4    8.93    6.78
   2  11  -3    9.46   11.17
  -2  11   3   18.11   13.62
  -2 -11   3   14.42   11.07
   2 -11  -3   15.64   12.49
   2  11  -2   26.69   13.40
  -2  11   2    1.91    9.97
  -2 -11   2   13.11   13.18
   2 -11  -2    2.68   10.92
   2  11  -1    4.83    6.84
  -2  11   1    3.26   11.13
   2 -11  -1   -0.81   10.66
  -2 -11   1   19.75   11.10
   2  11   0  -15.93    9.57
  -2  11   0   10.37   11.36
   2 -11   0    1.73    6.77
  -2 -11   0    6.41    5.01
   2  11   1  -15.01   10.61
   2 -11   1    3.64   10.69
  -2 -11  -1    5.45   10.00
   2  11   2   20.06   14.50
  -2  11  -2   44.48   15.10
  -2 -11  -2   21.27    9.79
   2 -11   2   49.26   14.72
  -2  11  -3   22.91   15.15
   2  11   3   27.47   15.09
  -2 -11  -3   28.88    9.74
   2 -11   3   51.29   14.07
  -2  11  -4   -0.18   11.76
   2  11   4   -0.16    8.64
  -2 -11  -4    7.12    6.02
   2 -11   4    6.64    9.86
  -2  11  -5   34.83   15.37
   2  11   5   39.08   14.06
  -2 -11  -5   51.16   19.04
   2 -11   5   47.91   17.33
   2  11   6   28.37    9.70
  -2  11  -6   12.11    9.07
  -2 -11  -6   53.95   16.40
   2 -11   6   34.02   10.19
  -2  11  -7    9.79    9.19
   2  11   7    2.22    9.61
  -2 -11  -7   17.48   10.91
   2 -11   7   14.62   10.40
  -2  11  -8    8.44    9.03
   2  11   8   16.68   12.25
  -2 -11  -8   45.83   13.15
   2 -11   8   28.50   19.44
   2  11   9    4.44    4.54
  -2  11  -9   12.16    8.17
  -2 -11  -9    2.29    8.86
   2 -11   9    6.14   11.42
   2  11  10   27.98    8.74
  -2  11 -10   -4.11    7.96
  -2 -11 -10   -3.31    8.23
   2 -11  10   10.27   12.02
   2  11  11    5.56    7.57
  -2  11 -11    7.26    7.55
  -2 -11 -11   12.04   11.00
   2 -11  11   -6.23   12.38
   2  11  12   -0.06    6.27
  -2  11 -12   11.29    6.68
  -2 -11 -12    5.21    9.01
   2 -11  12   13.65   10.59
   2  12 -11  104.58   13.94
  -2  12  11   82.56   12.98
   2 -12 -11  189.07   11.06
  -2 -12  11  155.05   15.10
   2  12 -10   26.04    9.93
  -2  12  10   29.90   12.30
   2 -12 -10   21.93    7.15
  -2 -12  10   16.90    9.45
   2  12  -9   87.93   12.91
  -2  12   9   61.82   13.16
   2 -12  -9   82.60   50.62
  -2 -12   9   73.74   38.20
  -2  12   8   15.46    8.74
   2  12  -8    8.56    8.40
   2 -12  -8   12.77    7.10
  -2 -12   8   10.37    5.74
  -2  12   7    2.02    9.81
   2  12  -7   11.31   14.36
   2 -12  -7   16.36    6.86
  -2 -12   7    6.82   11.82
   2  12  -6   13.71   10.77
  -2  12   6   -6.29    9.39
   2 -12  -6   -2.61    8.45
  -2 -12   6    2.38   11.90
  -2  12   5   25.55   10.66
   2  12  -5    6.30    9.75
   2 -12  -5    4.39    8.17
  -2 -12   5    7.43    8.98
   2  12  -4   11.81    9.30
  -2  12   4    3.83   11.20
  -2 -12   4   18.05   11.26
   2 -12  -4    6.27    6.11
  -2  12   3    3.76   11.31
   2  12  -3  -11.32   10.03
  -2 -12   3    0.97   10.17
   2 -12  -3   10.88    8.95
  -2  12   2    6.37   11.92
   2  12  -2   21.42   11.02
   2 -12  -2    7.91    9.18
  -2 -12   2   26.99   15.66
   2  12  -1   24.64   16.93
  -2  12   1   10.18   12.10
  -2 -12   1   16.38    9.73
   2 -12  -1    6.33    8.49
   2  12   0   19.03   15.98
  -2  12   0   25.87   15.81
  -2 -12   0    7.97    7.38
   2 -12   0   31.38   11.13
  -2  12  -1   -3.09    9.79
   2  12   1    8.21   11.24
  -2 -12  -1    9.39    9.14
   2 -12   1    6.47    7.91
  -2  12  -2   23.45   10.04
   2  12   2    2.88   10.85
  -2 -12  -2    8.81    8.31
   2 -12   2   17.61   13.66
   2  12   3   38.47   10.61
  -2  12  -3   14.84    9.98
  -2 -12  -3   41.97   21.67
   2 -12   3   65.09   16.28
   2  12   4   -9.19    9.40
  -2  12  -4    8.58   10.55
  -2 -12  -4   -7.16    9.97
   2 -12   4   -3.24    9.71
   2  12   5   98.04   15.47
  -2  12  -5   65.96   14.43
  -2 -12  -5  129.63   33.70
   2 -12   5  113.74   10.68
  -2  12  -6    9.57    8.82
   2  12   6   -4.74    8.72
  -2 -12  -6   -5.21   10.14
   2 -12   6    0.77    6.62
  -2  12  -7   34.85   13.44
   2  12   7   18.84    9.84
  -2 -12  -7   13.69   10.16
   2 -12   7   30.95   10.64
   2  12   8   10.61   12.39
  -2  12  -8    2.06   10.19
  -2 -12  -8    2.47    4.92
   2 -12   8    3.67    6.98
   2  12   9  -11.58    8.74
  -2  12  -9    1.70    8.71
  -2 -12  -9   -0.45    9.30
   2 -12   9    6.97   11.33
  -2  13   7   -2.41    9.81
   2  13  -7  -10.43   10.98
   2 -13  -7    5.18    6.18
  -2 -13   7    6.60   10.92
   2  13  -6   -0.35    7.47
  -2  13   6   -7.91   11.32
   2 -13  -6    0.56    4.83
  -2 -13   6    0.27   11.42
  -2  13   5   16.57   10.59
   2  13  -5  -10.47   11.57
   2 -13  -5    2.64    8.90
  -2 -13   5   10.49    5.53
   2  13  -4   -6.76   10.54
  -2  13   4   -2.29    9.71
  -2 -13   4    6.97    9.58
  -2  13   3   24.35   16.28
   2  13  -3   -2.20   10.66
  -2 -13   3    3.91   10.87
   2 -13  -3    6.45    9.12
   2  13  -2   16.08   16.16
  -2  13   2   -2.15   12.57
   2 -13  -2   39.20   14.76
  -2 -13   2   42.03   14.98
   2  13  -1   26.47   16.54
  -2  13   1   11.17   11.59
   2 -13  -1    3.31    6.49
  -2 -13   1    6.24    7.16
   2  13   0    7.68   10.02
  -2  13   0    5.46   11.39
  -2 -13   0    9.62    6.55
   2 -13   0    9.65    8.03
  -2  13  -1   20.94   10.69
   2  13   1   20.41   10.42
  -2 -13  -1    7.98    9.86
   2 -13   1   23.39   13.16
   2  13   2  -15.99   10.01
  -2  13  -2   -2.03   10.39
  -2 -13  -2   10.16    7.93
   2 -13   2    9.39   10.25
  -2  13  -3   34.20   11.41
   2  13   3    9.44    8.75
  -2 -13  -3   34.38   20.92
   2 -13   3   26.05   17.48
   2  13   4  -10.71   11.23
  -2  13  -4    4.64   11.86
  -2 -13  -4   19.00   15.60
   2 -13   4    1.06    7.42
   2  13   5   42.00   13.74
  -2  13  -5   43.11   15.37
  -2 -13  -5   38.83   13.85
   2 -13   5   26.79   23.69
  -3   0  23    5.30    6.48
  -3   0  22   22.50    9.21
  -3   0  21   -8.47    6.49
  -3   0  20  186.46   22.01
  -3   0  19    1.27    4.06
  -3   0  18  729.89   36.64
  -3   0  17    1.44    4.26
  -3   0  16 1400.59   24.32
   3   0 -16 1445.09    4.34
  -3   0  15    0.80    4.46
   3   0 -15    0.01    1.13
   3   0 -15    2.36    1.54
  -3   0  14  934.02   30.88
   3   0 -14 1023.82   32.52
   3   0 -14  493.17   16.70
   3   0 -13   -0.30    3.46
  -3   0  13    3.54    3.72
  -3   0  13   -1.01    1.49
   3   0 -13    4.66    2.70
   3   0 -12    5.90    3.45
  -3   0  12    7.09    6.55
  -3   0  12    2.86    1.59
   3   0 -12   -0.62    2.55
   3   0 -11    1.69    3.02
  -3   0  11   -6.41    4.19
  -3   0  11    1.55    1.27
   3   0 -11   -1.70    3.49
   3   0 -10  239.59    8.09
  -3   0  10  252.58    9.47
  -3   0  10  266.44    8.46
   3   0 -10  269.04   15.81
   3   0  -9    0.86    2.23
  -3   0   9    2.60    4.19
  -3   0   9   -0.77    1.89
   3   0  -9    2.07    4.07
   3   0  -8  548.69   25.45
  -3   0   8  522.96   23.70
  -3   0   8  528.84   24.13
   3   0  -8  537.62    7.31
   3   0  -7    1.60    0.89
  -3   0   7   -3.53    3.07
  -3   0   7    1.42    2.84
   3   0  -7   -0.18    4.74
   3   0  -6  449.47   14.55
  -3   0   6  446.04   15.03
  -3   0   6  432.27   15.85
   3   0  -6  427.39   16.36
   3   0  -5   -1.01    1.38
  -3   0   5   -1.15    1.44
  -3   0   5   -3.66    4.88
   3   0  -5   -7.92    9.28
  -3   0   4 2903.47   47.01
  -3   0   4 2871.21   47.88
   3   0  -4 2835.88   47.47
  -3   0   3    5.89    3.94
   3   0  -3   14.27    4.57
  -3   0   3    9.38    5.83
   3   0  -3   51.68   17.70
  -3   0   2 1733.99   29.79
   3   0  -2 1589.61   35.35
   3   0  -2 1900.89   36.82
  -3   0   2 1865.53   39.57
  -3   0   1   24.15   10.00
   3   0  -1   24.10   14.00
   3   0  -1   98.32   26.07
  -3   0   1   16.08   11.59
  -3   0   0  891.73   29.71
   3   0   0  925.71   33.86
  -3   0   0  945.53   31.70
   3   0   0  976.62   34.28
   3   0   1   -4.49    8.27
  -3   0  -1  -12.13    7.39
  -3   0  -1   -2.60    5.48
   3   0   1    4.33    9.06
   3   0   2 1315.43   23.88
  -3   0  -2 1336.58   23.94
  -3   0  -2 1350.90   23.67
   3   0   2 1371.51   32.81
   3   0   3   -5.11    6.81
  -3   0  -3   -7.65    4.78
  -3   0  -3   -0.31    1.91
   3   0   3   -0.88    4.06
   3   0   4   76.30    6.74
  -3   0  -4   61.52    5.59
  -3   0  -4   67.01    6.97
   3   0   4   73.21   13.22
  -3   0  -5   -0.33    5.22
   3   0   5    8.41    7.73
  -3   0  -5    0.95    2.67
   3   0   5    0.86    3.92
   3   0   6   -2.06    8.98
  -3   0  -6   -1.62    2.65
   3   0   6    9.14    5.07
   3   0   7    1.24    4.71
  -3   0  -7    1.17    1.95
   3   0   7   -2.65    2.86
   3   0   8  598.63   23.26
  -3   0  -8  625.23   20.78
   3   0   8  619.53   20.16
   3   0   9   16.51   10.06
   3   0   9    0.21    1.44
   3   0   9   -0.14    1.18
   3   0  10 1171.73   34.34
   3   0  10 1365.57   35.04
   3   0  10  888.87   23.04
   3   0  11    4.37    9.61
   3   0  12  479.19   19.91
   3   0  13   -4.97    9.25
   3   0  14  688.95   33.26
   3   0  15  -14.12    9.93
   3   0  16  478.72   19.64
   3   0  17    0.95   11.07
   3   0  18  172.21   19.57
   3   0  19   -1.75   10.12
   3   0  20    3.15    6.27
   3   0  21    2.17    4.84
  -3  -1  23    9.96    6.58
  -3   1  22   17.33    8.41
  -3  -1  22   35.65   14.33
  -3   1  21    3.92    4.02
  -3  -1  21    3.16    3.80
  -3   1  20  149.16   10.81
  -3  -1  20  164.42   16.26
  -3   1  19   -1.20    6.32
  -3  -1  19    1.52    2.01
  -3   1  18  890.83   29.17
  -3  -1  18 1008.84   23.97
  -3   1  17    6.13    6.60
  -3  -1  17    5.17    5.30
   3   1 -16  920.17   26.05
  -3   1  16  896.89   28.31
  -3  -1  16  988.74   31.28
   3  -1 -16  982.82   27.56
  -3  -1  16  984.37   27.91
   3   1 -15  108.02    3.59
  -3   1  15  100.74    8.63
  -3  -1  15   99.49    8.91
   3  -1 -15  111.68    5.33
  -3  -1  15  108.89    3.89
   3  -1 -15   84.53    2.63
   3   1 -14  333.68   11.85
  -3   1  14  264.15   15.00
  -3  -1  14  328.63   15.87
   3  -1 -14  308.75   11.84
  -3  -1  14  312.48    9.36
   3  -1 -14  212.49    7.59
   3   1 -13  417.25   12.10
  -3   1  13  354.35   11.84
  -3  -1  13  356.06   15.73
  -3  -1  13  383.58   15.94
   3  -1 -13  395.24   16.43
   3  -1 -13  391.32   16.56
   3  -1 -13  237.63   10.02
   3   1 -12   98.88    6.81
   3   1 -12  103.42    4.88
  -3   1  12   94.42    6.49
  -3  -1  12  111.24    7.62
  -3  -1  12   98.31    6.21
   3  -1 -12  101.74    5.19
   3  -1 -12  106.78    4.83
   3  -1 -12   60.52    3.79
   3   1 -11  371.95   13.41
   3   1 -11  384.45   13.47
  -3   1  11  345.33   12.99
  -3  -1  11  384.71   14.61
  -3  -1  11  356.86   12.84
   3  -1 -11  366.45   12.84
   3  -1 -11  375.57   13.23
   3  -1 -11  189.03    9.14
   3   1 -10   24.20    8.81
  -3   1  10   12.43    4.11
   3   1 -10   13.10    9.10
  -3   1  10   16.66    7.37
   3  -1 -10   18.71    3.12
   3  -1 -10   19.42   11.39
  -3  -1  10   24.69    6.68
  -3  -1  10   20.44    8.71
   3   1  -9  206.05    8.13
  -3   1   9  185.02    9.33
   3   1  -9  224.26    8.85
  -3   1   9  208.19    7.22
   3  -1  -9  205.05    7.23
  -3  -1   9  205.25    7.61
   3  -1  -9  220.13    7.88
  -3  -1   9  220.85    8.84
   3   1  -8    8.91    4.07
  -3   1   8    7.49    5.70
   3   1  -8    7.99    3.19
  -3   1   8    6.77    5.03
  -3  -1   8    9.88    5.29
   3  -1  -8   14.39    9.23
  -3  -1   8   10.53    4.54
   3  -1  -8    9.05    3.59
   3   1  -7   94.40    6.91
  -3   1   7   76.35    5.62
   3   1  -7   89.74    7.86
  -3   1   7   84.19    5.40
  -3  -1   7   89.74    7.43
   3  -1  -7   86.46   11.34
  -3  -1   7   91.02    6.03
   3  -1  -7   92.42    6.67
   3   1  -6  138.19    6.12
  -3   1   6  110.42    6.27
   3   1  -6  148.80    8.58
  -3   1   6  139.57    6.56
  -3  -1   6  138.13    6.13
   3  -1  -6  142.87    7.98
  -3  -1   6  137.25    7.08
   3  -1  -6  131.78    4.97
   3   1  -5   27.84   18.50
   3   1  -5   47.39    5.74
  -3   1   5   52.02    3.91
   3  -1  -5   35.06    2.88
   3  -1  -5   53.76    6.75
   3  -1  -5   50.33    6.53
  -3  -1   5   41.29    6.44
  -3  -1   5   43.38    4.84
   3   1  -4  452.13   18.56
   3   1  -4  413.63   23.52
  -3   1   4  406.87   14.20
   3  -1  -4  294.46    9.84
   3  -1  -4  438.65   14.17
   3  -1  -4  426.34   17.07
  -3  -1   4  423.78   14.39
  -3  -1   4  397.10   15.18
  -3   1   3   75.66    6.30
  -3   1   3   87.72   20.11
   3   1  -3   98.79   44.59
  -3  -1   3   66.23    5.01
  -3  -1   3   86.35    7.38
   3  -1  -3   67.21    8.12
   3  -1  -3   90.34    3.78
  -3  -1   3   87.83    9.62
  -3   1   2    5.14    5.37
   3   1  -2   76.19   20.58
  -3   1   2    3.37    4.09
   3   1  -2   19.53    8.43
  -3  -1   2   30.27    8.82
   3  -1  -2   23.66   16.33
   3  -1  -2    7.81    4.93
  -3  -1   2   20.93    9.16
  -3   1   1 3936.60   64.79
  -3   1   1 3738.80   61.09
   3   1  -1 3882.10   66.63
   3   1  -1 2994.93   50.98
  -3  -1   1 3172.83   52.49
   3  -1  -1 3854.27   63.32
   3  -1  -1 3816.14   63.62
  -3  -1   1 3743.48   62.22
  -3   1   0 2849.46   47.27
  -3   1   0 2835.85   46.81
   3   1   0 2439.13   50.70
  -3  -1   0 2348.30   39.73
   3  -1   0 2965.43   49.68
   3  -1   0 2895.42   48.33
  -3  -1   0 2717.88   45.65
   3   1   1 1678.63   39.37
  -3   1  -1 1660.41   28.85
  -3   1  -1 1603.28   27.60
   3   1   1 1417.76   27.13
   3  -1   1 1636.50   29.28
   3  -1   1 1678.14   29.87
  -3  -1  -1 1565.37   27.90
  -3  -1  -1 1312.87   23.41
   3   1   2 1420.28   25.76
  -3   1  -2 1385.45   24.63
  -3   1  -2 1436.57   26.98
   3   1   2 1189.63   21.91
   3  -1   2 1341.50   24.80
   3  -1   2 1438.47   25.42
  -3  -1  -2 1367.80   24.13
  -3  -1  -2 1223.90   22.13
  -3   1  -3  268.81   10.09
   3   1   3  250.44   12.91
   3   1   3  279.38   10.91
  -3   1  -3  271.54   10.43
  -3  -1  -3  254.13   10.89
   3  -1   3  288.40   10.26
  -3  -1  -3  277.83   10.40
   3  -1   3  273.10   12.53
  -3   1  -4  294.06   14.60
   3   1   4  258.79   14.39
   3   1   4  304.57   14.65
  -3   1  -4  306.29   14.00
   3  -1   4  277.83   15.67
   3  -1   4  284.59   13.91
  -3  -1  -4  286.91   13.36
  -3  -1  -4  273.72   13.23
  -3   1  -5    1.47    3.16
   3   1   5    5.86    4.58
   3   1   5   15.68   11.28
  -3  -1  -5    4.10    3.53
  -3  -1  -5   11.62    3.73
   3  -1   5    5.90    6.02
   3  -1   5   14.44    5.83
   3  -1   5    7.49    3.56
   3   1   6   42.74    4.42
   3   1   6   37.77    8.87
   3  -1   6   54.91   14.30
   3  -1   6   39.24    8.56
  -3  -1  -6   36.69    3.16
   3  -1   6   27.75    3.33
   3   1   7   19.10    7.61
   3   1   7   15.04    9.98
   3  -1   7    8.98    9.10
  -3  -1  -7   22.37    7.77
   3  -1   7   17.86    6.18
   3  -1   7   11.56    3.50
   3   1   8 1469.20   44.56
   3   1   8 1292.83   42.06
   3  -1   8 1379.91   43.58
  -3  -1  -8 1387.68   42.31
   3  -1   8 1415.38   43.67
   3  -1   8  909.02   28.14
   3   1   9  634.63    5.06
   3   1   9  557.77   13.95
   3  -1   9  603.59   15.11
   3  -1   9  609.46   20.67
  -3  -1  -9  609.61   20.00
   3  -1   9  437.42   13.77
   3   1  10 1125.23   32.76
   3  -1  10 1174.04   34.81
  -3  -1 -10 1246.98   32.21
   3  -1  10 1241.70   32.22
   3  -1  10 1022.48   26.88
   3   1  11  317.55   16.85
   3  -1  11  319.12   18.26
   3  -1  11  323.28    4.36
   3  -1  11  275.38    9.10
   3   1  12  436.94   43.70
   3  -1  12  473.33   20.94
   3   1  13   22.84    8.07
   3  -1  13   17.75    9.14
   3   1  14  368.50   20.57
   3  -1  14  410.93   20.22
   3   1  15    2.01    6.42
   3  -1  15    5.12    5.55
   3   1  16  221.41   16.91
   3  -1  16  247.37   13.18
   3   1  17   47.38   18.27
   3  -1  17   45.07   14.27
   3   1  18  113.63   15.35
   3  -1  18  103.82   26.88
   3   1  19   36.90   10.41
   3  -1  19   17.58    7.18
   3   1  20    6.08   11.16
   3  -1  20    3.18   11.21
   3   1  21    1.96    9.22
   3  -1  21   -1.04    9.78
  -3  -2  23   44.37    6.98
  -3   2  22   33.14   12.85
  -3  -2  22   26.80   11.55
  -3   2  21   16.21    8.20
  -3  -2  21   16.99    7.90
  -3   2  20   64.84   24.28
  -3  -2  20   82.40   23.76
  -3   2  19   49.10   10.29
  -3  -2  19   53.62    6.88
  -3   2  18  304.77   15.52
  -3  -2  18  367.75   30.51
  -3   2  17  129.07    8.63
  -3  -2  17  157.33    9.35
  -3   2  16  339.69   24.47
   3   2 -16  351.13   15.48
  -3  -2  16  423.40   20.35
   3  -2 -16  406.21   17.31
   3   2 -15  148.71    4.69
  -3   2  15  152.68   10.12
  -3  -2  15  187.13   11.50
   3  -2 -15  163.54    5.08
  -3  -2  15  160.53    4.18
   3  -2 -15  129.83    3.90
   3   2 -14  286.63    8.86
  -3   2  14  245.81   12.97
  -3  -2  14  307.19   12.97
   3  -2 -14  285.90    8.89
  -3  -2  14  282.98    8.28
   3   2 -13  365.57   13.17
  -3   2  13  310.81   12.95
  -3  -2  13  379.35   14.53
   3  -2 -13  368.99   13.18
  -3  -2  13  351.68   12.28
   3  -2 -13  350.58   14.45
   3  -2 -13  253.95    9.17
   3   2 -12   98.94    5.06
  -3   2  12   87.05    6.32
   3  -2 -12   93.96    6.87
   3  -2 -12  103.15    8.63
  -3  -2  12   94.03   12.45
  -3  -2  12   82.44    7.17
   3  -2 -12   71.51    4.42
   3   2 -11  160.09   11.07
  -3   2  11  144.06    7.89
   3  -2 -11  164.34    5.69
   3  -2 -11  158.09    6.25
  -3  -2  11  165.79    6.09
  -3  -2  11  176.30    9.53
   3  -2 -11  106.39    6.64
   3   2 -10    1.23    3.56
   3   2 -10    6.35    4.87
  -3   2  10    2.77    3.52
   3  -2 -10   -2.08    3.40
   3  -2 -10   -9.59    4.18
  -3  -2  10   -0.40    3.34
  -3  -2  10    2.07    3.38
   3  -2 -10    4.48    3.59
   3   2  -9  408.08   16.18
   3   2  -9  455.77   18.38
  -3   2   9  319.84   13.48
   3  -2  -9  364.73   14.53
   3  -2  -9  420.05   18.35
  -3  -2   9  405.55   15.99
  -3  -2   9  406.21   16.58
   3  -2  -9  243.87   10.89
   3   2  -8  440.83   20.13
   3   2  -8  453.90   30.64
  -3   2   8  316.01   15.61
   3  -2  -8  355.25   16.19
   3  -2  -8  428.71   20.09
  -3  -2   8  403.70   18.57
  -3  -2   8  417.86   19.99
   3  -2  -8  238.69   12.25
   3   2  -7   48.61    4.26
   3   2  -7   46.29    7.97
  -3   2   7   31.20    7.43
   3  -2  -7   36.84    4.00
   3  -2  -7   45.99    6.49
  -3  -2   7   48.88    5.17
  -3  -2   7   47.36   14.90
   3  -2  -7   21.98    5.08
   3   2  -6   22.33   11.59
   3   2  -6   44.38    4.04
   3  -2  -6   46.77    5.75
   3  -2  -6   32.60    4.05
  -3  -2   6   36.69    4.45
  -3  -2   6   42.81    5.30
   3  -2  -6   41.48   13.37
   3  -2  -6   19.76    3.81
   3   2  -5    2.40    6.01
   3   2  -5    4.52    3.12
   3  -2  -5    2.69    4.21
   3  -2  -5    4.37    3.24
  -3  -2   5    2.17    1.78
  -3  -2   5    4.22    5.18
   3  -2  -5    6.27    4.16
   3  -2  -5    0.76    5.00
  -3   2   4   48.93    5.66
   3   2  -4   51.52    4.62
   3   2  -4   55.63   27.19
  -3  -2   4   56.64    4.71
   3  -2  -4   63.45   20.04
   3  -2  -4   55.83   10.66
  -3  -2   4   45.64    5.83
   3  -2  -4   21.89    8.65
   3   2  -3  178.27   10.12
  -3   2   3  175.33   11.35
  -3  -2   3  188.37   15.64
  -3  -2   3  113.27    6.99
   3  -2  -3  163.48    7.17
  -3  -2   3  158.10   12.26
   3  -2  -3  156.56   16.81
   3  -2  -3   85.41    5.23
  -3   2   2 1681.64   28.20
  -3  -2   2 1705.07   29.13
   3  -2  -2 1669.34   28.57
  -3  -2   2 1168.77   21.23
   3  -2  -2 1634.53   28.93
   3   2  -1  604.33   22.00
  -3   2   1  569.45   19.77
   3   2  -1  402.00   17.74
   3  -2  -1  577.80   20.26
  -3  -2   1  427.64   16.51
  -3  -2   1  565.82   19.42
   3  -2  -1  583.38   20.26
   3  -2  -1  290.61   12.25
   3   2   0 2286.29   40.16
  -3   2   0 2137.44   36.07
   3   2   0 1566.86   28.38
   3  -2   0 2137.23   36.62
  -3  -2   0 1668.57   29.24
  -3  -2   0 2097.98   36.04
   3  -2   0 2179.25   41.01
   3  -2   0 1173.68   21.34
  -3   2  -1  113.88    7.56
   3   2   1   85.97    7.14
   3   2   1  119.03   11.52
  -3  -2  -1   96.22    5.87
  -3  -2  -1  111.30    7.67
   3  -2   1  111.27   10.14
   3  -2   1   65.17    6.76
  -3   2  -2 1386.73   24.33
   3   2   2 1451.43   25.19
  -3  -2  -2 1160.27   20.93
   3  -2   2 1432.45   25.71
  -3  -2  -2 1386.15   24.10
   3  -2   2 1409.10   31.77
  -3   2  -3 1320.55   23.27
   3   2   3 1128.30   22.23
   3  -2   3 1399.34   25.08
  -3  -2  -3 1097.05   19.90
   3  -2   3 1435.97   25.03
  -3  -2  -3 1379.54   24.41
  -3   2  -4  645.24   17.35
   3   2   4  725.86   19.23
   3   2   4  565.37   17.88
  -3  -2  -4  617.36   25.77
   3  -2   4  717.12   19.07
  -3  -2  -4  687.45   18.00
   3  -2   4  741.45   21.61
   3  -2   4  416.32   11.41
   3   2   5   17.13    7.03
   3   2   5    5.55    8.87
   3  -2   5    1.81    9.61
  -3  -2  -5    6.16    5.08
   3  -2   5    6.20    5.44
   3  -2   5    8.15    3.17
   3   2   6   -3.48    4.23
   3   2   6   -1.06    9.48
   3  -2   6    6.40    8.62
  -3  -2  -6   -7.41    4.41
   3  -2   6   -0.01    1.48
   3  -2   6   -4.48    3.20
   3   2   7  551.26   21.07
   3   2   7  490.06   22.68
   3  -2   7  537.43   23.26
  -3  -2  -7  522.26   20.16
   3  -2   7  541.39   20.82
   3  -2   7  368.96   14.66
   3   2   8  663.78   24.46
   3  -2   8  725.37   30.20
   3  -2   8  749.62   23.45
  -3  -2  -8  704.28   22.03
   3   2   9  842.83   22.54
   3   2   9  767.09   43.50
   3  -2   9  865.47   27.37
  -3  -2  -9  844.10   23.43
   3  -2   9  874.01   24.14
   3  -2   9  679.47   18.69
   3   2  10  564.93   18.30
   3   2  10  543.27   22.11
  -3  -2 -10  606.92   19.52
   3  -2  10  628.54   20.54
   3  -2  10  532.88   17.56
   3  -2  10  608.94   46.88
   3   2  11  156.26    5.34
   3   2  11  172.29   10.27
   3  -2  11  202.40   17.95
   3  -2  11  204.05    7.20
  -3  -2 -11  200.92    7.55
   3  -2  11  170.67    7.89
   3   2  12  299.57    8.75
   3   2  12  458.11   19.36
  -3  -2 -12  492.75   14.08
   3  -2  12  503.24   14.83
   3  -2  12  463.95   13.58
   3  -2  12  526.49   21.77
   3   2  13   75.12   13.85
   3  -2  13   74.53   13.81
   3  -2  13   65.89    2.15
   3  -2  13   69.20    3.98
   3   2  14  201.13   10.90
   3  -2  14  238.26   12.16
   3   2  15   26.68   11.80
   3  -2  15   30.73    9.51
   3   2  16   14.47   16.14
   3  -2  16   40.28   14.06
   3   2  17  113.58   36.99
   3  -2  17  169.58   12.98
   3   2  18   20.75   10.21
   3  -2  18   12.45    9.14
   3   2  19   37.41   10.22
   3  -2  19   44.06   10.62
   3   2  20   46.96   15.87
   3  -2  20   10.48    5.53
   3   2  21    1.85    9.15
   3  -2  21   -7.74    9.20
  -3  -3  23   29.22    8.95
  -3   3  22    1.11    5.65
  -3  -3  22    5.95    7.54
  -3   3  21   21.40    8.80
  -3  -3  21   38.01    8.87
  -3   3  20   35.88   11.08
  -3  -3  20   59.19    9.97
  -3   3  19   65.35    8.20
  -3  -3  19   68.51   19.05
  -3   3  18   49.47    8.25
  -3  -3  18   47.13   11.77
  -3   3  17  131.54    8.72
  -3  -3  17  161.43   12.59
  -3   3  16   87.63   20.52
   3   3 -16  124.16    5.94
  -3  -3  16  150.27    7.55
   3  -3 -16  136.68    5.84
   3   3 -15  157.98    6.83
  -3   3  15  148.96   21.41
  -3  -3  15  199.15    8.76
  -3  -3  15  152.32    4.89
   3  -3 -15  176.93    6.17
   3   3 -14  162.74    7.25
  -3   3  14  135.10   14.32
  -3  -3  14  199.66   18.81
  -3  -3  14  162.50    7.02
   3  -3 -14  160.82    7.14
   3  -3 -14  128.02    7.69
   3   3 -13  120.95    8.83
  -3   3  13   92.72    6.90
  -3  -3  13  121.27   10.79
  -3  -3  13  115.63    5.85
   3  -3 -13  115.06    6.80
   3  -3 -13   95.20    5.97
   3   3 -12  302.16   13.09
  -3   3  12  240.30   11.48
   3  -3 -12  267.14   12.09
   3  -3 -12  305.94   13.43
  -3  -3  12  285.12   12.78
  -3  -3  12  319.73   24.44
   3  -3 -12  227.46   10.07
   3   3 -11   54.17    7.15
  -3   3  11   32.22   14.49
   3  -3 -11   42.74    4.36
   3  -3 -11   49.24    5.26
  -3  -3  11   47.68    5.58
  -3  -3  11   51.24    6.43
   3  -3 -11   33.94    3.81
   3   3 -10   29.03   13.18
  -3   3  10   18.23    6.37
   3  -3 -10   27.08    5.54
   3  -3 -10   27.30    9.05
  -3  -3  10   24.36    8.19
  -3  -3  10   30.70   11.95
   3  -3 -10   12.67    4.00
   3   3  -9  345.45   11.94
   3   3  -9  359.06    8.36
  -3   3   9  241.45    9.27
   3  -3  -9  294.73    7.65
   3  -3  -9  359.90   14.77
  -3  -3   9  327.33   14.39
  -3  -3   9  364.83    8.55
   3  -3  -9  225.75    5.79
   3   3  -8 1721.52   46.15
   3   3  -8 1727.61   46.64
  -3   3   8 1176.69   32.00
   3  -3  -8 1379.22   37.15
   3  -3  -8 1755.43   47.32
  -3  -3   8 1675.20   45.12
  -3  -3   8 1789.86   48.66
   3  -3  -8 1078.16   29.30
   3   3  -7  208.90   12.91
   3   3  -7  191.61   10.85
   3  -3  -7  216.93   11.30
   3  -3  -7  146.74    8.11
  -3  -3   7  209.39   11.96
  -3  -3   7  183.35   10.58
   3  -3  -7  212.00   14.04
   3  -3  -7  123.27    6.97
   3   3  -6  634.27   16.78
   3   3  -6  683.40   19.46
  -3  -3   6  660.12   18.06
   3  -3  -6  481.00   12.74
   3  -3  -6  679.01   19.05
  -3  -3   6  656.41   18.06
   3  -3  -6  734.40   20.19
   3  -3  -6  401.78   11.61
   3   3  -5   24.51   11.28
   3   3  -5   13.16    4.04
   3  -3  -5   26.23    5.27
   3  -3  -5   10.97    4.23
  -3  -3   5   17.70   11.31
  -3  -3   5   18.16    5.56
   3  -3  -5   19.20   13.83
   3  -3  -5   14.78    6.30
   3   3  -4  472.09   23.91
  -3   3   4  483.98   16.24
   3   3  -4  514.68   25.04
   3  -3  -4  492.39   27.69
  -3  -3   4  481.79   25.01
  -3  -3   4  448.58   15.67
   3  -3  -4  490.26   23.90
   3  -3  -4  288.83   14.45
   3   3  -3  606.82   21.97
   3   3  -3  627.36   21.18
  -3   3   3  603.66   20.82
  -3   3   3  292.63   11.90
  -3  -3   3  553.75   20.49
   3  -3  -3  621.76   20.69
   3  -3  -3  342.82   13.62
  -3  -3   3  622.36   21.87
  -3   3   2 2279.30   39.16
  -3  -3   2 2364.28   40.50
  -3  -3   2 1546.29   26.93
   3  -3  -2 1390.02   24.59
   3   3  -1  123.21    7.59
  -3   3   1  121.66   10.43
  -3   3   1   63.83    6.47
  -3  -3   1   87.29    7.10
  -3  -3   1  111.65    7.74
  -3  -3   1  139.97    8.90
   3  -3  -1   69.41    5.97
   3  -3  -1  129.82    6.75
  -3   3   0 3927.14   64.80
   3   3   0 2862.44   48.62
  -3   3   0 2106.54   36.51
   3   3   0 4050.51   67.49
  -3  -3   0 4089.35   69.23
   3  -3   0 4030.00   66.86
   3  -3   0 2440.47   41.16
  -3  -3   0 2924.28   49.08
  -3   3  -1   62.72    5.66
   3   3   1   28.08    6.47
  -3   3  -1   31.66   25.98
   3   3   1   56.30   20.00
  -3  -3  -1   58.03    5.36
   3  -3   1   39.49    7.17
   3  -3   1   25.96   14.62
  -3  -3  -1   43.00    4.34
  -3   3  -2 2547.64   61.73
   3   3   2 2030.50   50.36
  -3   3  -2 1378.83   35.05
   3   3   2 2528.87   61.61
  -3  -3  -2 2619.68   64.23
   3  -3   2 2659.49   64.98
   3  -3   2 1695.17   41.71
  -3  -3  -2 2050.61   50.86
  -3   3  -3   87.79   13.46
   3   3   3   60.45    9.30
   3   3   3   93.83    8.39
  -3  -3  -3   61.30    6.67
  -3  -3  -3   82.93    6.74
   3  -3   3   89.22    8.47
   3  -3   3   49.11    6.28
   3   3   4 1650.76   40.92
   3   3   4 1239.86   32.02
   3  -3   4 1578.20   39.69
  -3  -3  -4 1570.25   38.56
   3  -3   4 1657.52   41.73
   3  -3   4 1054.19   26.69
   3   3   5  219.32    9.52
   3   3   5  175.01   12.45
   3  -3   5  240.82   10.77
  -3  -3  -5  230.11    8.63
   3  -3   5  235.78    9.50
   3  -3   5  161.58    8.22
   3   3   6  319.25   11.84
   3   3   6  234.61   11.26
   3  -3   6  319.05   15.39
  -3  -3  -6  281.73   10.22
   3  -3   6  320.74   14.99
   3   3   7  484.21   16.84
   3   3   7  429.68   19.18
   3  -3   7  520.54   21.35
  -3  -3  -7  471.09   16.47
   3  -3   7  514.72   18.14
   3  -3   7  363.11   13.23
   3   3   8    5.71    6.16
   3   3   8   -4.96    9.39
   3  -3   8   -3.32    3.22
  -3  -3  -8   -2.83    3.40
   3  -3   8    1.26    1.92
   3  -3   8   -2.45    9.36
   3   3   9  241.60   13.99
   3   3   9  247.15   18.85
   3  -3   9  265.81   17.14
  -3  -3  -9  260.35   11.31
   3  -3   9  275.30   12.40
   3  -3   9  223.33   10.09
   3   3  10  371.96   12.96
   3   3  10  375.43   17.66
   3  -3  10  477.27   17.50
  -3  -3 -10  414.53   15.80
   3  -3  10  379.88   14.26
   3  -3  10  462.14   29.05
   3   3  11    4.86    3.70
   3   3  11    8.54    9.20
   3  -3  11   -2.29   11.32
  -3  -3 -11   -1.32    2.17
   3  -3  11    1.71    1.60
   3  -3  11   -0.86    1.82
   3   3  12  448.01   19.33
   3  -3  12  552.25   25.97
   3  -3  12  544.51   18.11
   3  -3  12  486.22   14.65
   3   3  13   66.75   29.62
   3   3  13   40.48    4.46
   3  -3  13   77.95   24.71
   3  -3  13   70.95    8.47
   3   3  14   78.67   22.15
   3  -3  14   81.12   29.66
   3   3  15  174.45   16.07
   3  -3  15  209.81   36.82
   3   3  16    7.12    7.89
   3  -3  16   11.45    8.24
   3   3  17  109.66   36.52
   3  -3  17  143.44   17.83
   3   3  18    5.30   10.17
   3  -3  18   10.60   10.79
   3   3  19   17.44   12.10
   3  -3  19   31.13    9.18
   3   3  20   21.03   10.13
   3  -3  20   21.32   12.41
  -3  -4  23   -2.19    6.35
  -3  -4  22   15.19    7.45
  -3   4  21   19.82    7.62
  -3  -4  21   13.30   13.56
  -3   4  20   22.10    5.78
  -3  -4  20   29.59   13.77
  -3   4  19   49.28    7.48
  -3  -4  19   66.76   23.34
  -3   4  18   12.92    7.66
  -3  -4  18    4.62    4.49
  -3   4  17   54.78   13.00
  -3  -4  17   81.09    9.35
  -3   4  16   17.94    5.79
   3   4 -16   36.66    5.54
  -3  -4  16   46.56   12.17
   3  -4 -16   32.39   13.70
  -3   4  15   73.34    8.36
   3   4 -15   77.38    5.04
  -3  -4  15  115.35   27.07
   3  -4 -15   98.65    5.69
   3   4 -14  135.23    6.91
  -3   4  14  124.47   12.50
  -3  -4  14  161.60   11.42
   3  -4 -14  110.70    5.88
   3  -4 -14  142.70    5.01
   3   4 -13   20.13    8.57
  -3   4  13   22.03    7.10
  -3  -4  13   12.97    6.45
   3  -4 -13   22.69    4.05
   3  -4 -13   28.98    6.69
   3   4 -12   -6.29    4.65
  -3   4  12   -1.14    4.53
  -3  -4  12    4.34    2.82
   3  -4 -12   -0.68    2.71
   3  -4 -12    2.42    3.13
  -3   4  11   20.43    4.80
   3   4 -11   23.01   12.99
  -3  -4  11   16.83   10.43
   3  -4 -11   25.31    9.76
   3  -4 -11    5.43    3.89
  -3   4  10  262.36   15.74
   3   4 -10  375.74   16.69
   3  -4 -10  304.02   16.72
   3  -4 -10  385.08   16.57
  -3  -4  10  401.49   18.23
   3   4  -9  104.15    7.96
  -3  -4   9  130.75   17.65
   3  -4  -9  131.22    6.26
   3  -4  -9  121.38    5.38
   3  -4  -9   92.23    4.98
   3  -4  -9   71.28   11.08
   3   4  -8  372.33   16.68
  -3  -4   8  443.74   21.14
   3  -4  -8  486.74   19.09
   3  -4  -8  440.69   20.82
   3  -4  -8  313.64   19.82
   3  -4  -8  282.77   12.14
  -3   4   7    0.20    6.58
   3   4  -7    3.47    6.28
   3  -4  -7    8.20    6.39
  -3  -4   7   -3.93    6.90
   3  -4  -7    2.05    4.05
   3  -4  -7    2.90    2.98
   3   4  -6  477.89   20.56
   3   4  -6  444.93   18.07
  -3   4   6  259.97   13.88
   3  -4  -6  331.18   13.44
   3  -4  -6  499.97   22.37
   3  -4  -6  303.94   13.38
  -3  -4   6  490.11   21.63
   3   4  -5   43.25   15.90
   3   4  -5   31.44    8.73
  -3   4   5   19.58    6.56
   3  -4  -5   33.52    7.44
  -3  -4   5   34.51    5.38
   3  -4  -5   26.60    3.35
   3  -4  -5   28.16    6.35
  -3  -4   5   49.40    6.04
  -3   4   4  803.21   22.08
   3   4  -4  783.98   23.03
  -3   4   4  468.77   15.59
   3   4  -4  830.25   23.68
   3  -4  -4  811.47   23.94
  -3  -4   4  818.27   22.19
  -3  -4   4  742.74   19.79
   3  -4  -4  544.06   16.31
   3   4  -3  500.87   25.39
   3   4  -3  505.59   24.75
  -3   4   3  455.86   23.33
  -3   4   3  276.58   16.88
  -3  -4   3  445.96   27.46
   3  -4  -3  495.32   23.32
   3  -4  -3  302.24   15.81
  -3  -4   3  493.35   23.58
  -3   4   2  678.84   18.17
  -3   4   2  432.25   15.82
   3   4  -2  736.98   26.06
  -3  -4   2  747.07   21.07
   3  -4  -2  705.70   28.70
  -3  -4   2  448.45   13.84
   3  -4  -2  481.90   15.19
   3   4  -1  622.03   19.23
  -3   4   1  608.19   16.92
  -3   4   1  371.87   16.04
  -3  -4   1  392.17   19.14
   3  -4  -1  623.93   18.53
  -3  -4   1  682.72   19.96
  -3  -4   1  588.10    8.54
   3  -4  -1  412.68   13.91
   3   4   0 2890.98   70.88
  -3   4   0 2717.38   65.99
  -3   4   0 1614.10   41.30
  -3  -4   0 1892.09   46.84
   3  -4   0 2741.64   67.15
  -3  -4   0 3005.82   73.38
  -3  -4   0 2685.06   69.50
   3  -4   0 1881.50   46.80
  -3   4  -1  434.75   20.48
  -3   4  -1  259.64   16.50
   3   4   1  277.12   16.82
   3   4   1  434.86   21.77
  -3  -4  -1  408.15   19.35
   3  -4   1  284.87   14.07
   3  -4   1  449.52   21.50
  -3   4  -2 1622.66   41.05
   3   4   2 1972.07   48.73
   3   4   2 2734.48   66.77
   3  -4   2 2528.66   62.36
  -3  -4  -2 2682.99   65.21
  -3   4  -3   40.88    6.10
   3   4   3   51.38    9.33
   3   4   3   80.98    9.49
  -3  -4  -3   76.57    8.82
   3  -4   3   47.66    4.71
   3  -4   3   66.07    8.15
   3   4   4 1052.55   35.31
  -3   4  -4  802.03   23.45
   3   4   4 1385.38   38.52
  -3  -4  -4 1370.79   37.37
  -3   4  -5  274.79   12.97
   3   4   5  387.23   19.39
   3   4   5  482.33   19.87
  -3  -4  -5  470.83   18.72
   3  -4   5  354.99   14.83
   3  -4   5  485.25   21.78
  -3   4  -6  120.08    7.77
   3   4   6  190.19   11.68
   3   4   6  208.98    8.05
  -3  -4  -6  197.92    6.59
   3  -4   6  158.32    5.98
   3  -4   6  226.84   13.92
   3   4   7   14.78    3.15
   3   4   7   16.42    9.49
   3  -4   7   20.92   11.70
   3  -4   7   15.28    3.59
  -3  -4  -7   15.90    6.36
   3   4   8   25.73    7.36
   3   4   8   12.04    9.14
   3  -4   8   28.70    9.76
  -3  -4  -8   29.78    9.49
   3  -4   8   23.76    3.83
   3  -4   8   47.61   13.11
   3   4   9    9.56    5.97
   3   4   9   13.09    9.08
   3  -4   9    9.02    6.45
  -3  -4  -9    7.72    3.53
   3  -4   9    5.81    3.58
   3  -4   9   20.50   14.22
   3   4  10   95.13    6.89
   3   4  10   74.47    8.95
   3  -4  10  114.63   14.52
  -3  -4 -10   86.74   11.04
   3  -4  10  106.14   15.76
   3  -4  10   68.76    7.43
   3   4  11   59.86    6.93
   3   4  11   23.80    9.85
   3  -4  11   68.00    8.82
  -3  -4 -11   67.69    4.25
   3  -4  11   45.17    8.27
   3  -4  11   70.99   13.52
   3   4  12  491.49   25.87
   3   4  12  429.94   19.02
   3  -4  12  640.68   53.25
   3  -4  12  587.86   29.82
   3   4  13  233.85   15.45
   3   4  13  147.88    4.87
   3  -4  13  245.23   39.13
   3  -4  13  231.87    8.84
   3   4  14   43.07   14.97
   3  -4  14   64.52   19.86
   3   4  15  109.27   14.68
   3  -4  15  124.21   35.37
   3   4  16    0.39   11.23
   3  -4  16    3.80    5.59
   3   4  17   20.13   12.19
   3  -4  17   25.44    9.04
   3   4  18   30.72   12.47
   3  -4  18   17.22   10.66
   3   4  19   22.77   15.19
   3  -4  19    4.92    5.18
   3   4  20   -1.10    8.87
   3  -4  20   15.05    8.83
  -3  -5  22    3.46    4.60
  -3   5  21   15.13    7.82
  -3  -5  21   19.32    8.58
  -3   5  20   10.21    5.90
  -3  -5  20   17.13    8.59
  -3   5  19   23.87    5.81
  -3  -5  19   40.99    9.58
  -3   5  18   31.38    5.75
  -3  -5  18   41.79   11.10
   3   5 -17    0.54    3.76
  -3   5  17    5.86    5.65
  -3  -5  17    7.62    5.79
  -3   5  16   72.40    8.47
   3   5 -16   76.04    6.68
  -3  -5  16   79.91   27.61
   3  -5 -16   91.41    7.51
  -3   5  15   19.50    5.97
   3   5 -15   28.55    6.95
  -3  -5  15   35.68   18.97
   3  -5 -15   32.97    6.08
  -3   5  14   15.67    5.68
   3   5 -14    7.94    7.07
  -3  -5  14    3.18    6.21
   3  -5 -14   -3.07    3.71
  -3   5  13  162.09   12.83
   3   5 -13  225.41    9.65
  -3  -5  13  246.51   10.58
   3  -5 -13  234.39   22.37
  -3   5  12   34.04    6.60
   3   5 -12   54.69   22.62
  -3  -5  12   65.13   16.10
   3  -5 -12   53.36    7.99
   3   5 -11   -3.38    6.75
   3  -5 -11   -1.33    5.32
   3  -5 -11    5.26    3.60
  -3  -5  11    1.94    7.12
   3   5 -10  235.27   18.27
   3  -5 -10  269.66   10.15
   3  -5 -10  256.56   10.38
  -3  -5  10  261.21   12.65
   3   5  -9  314.02   15.33
  -3   5   9  184.86   11.32
   3  -5  -9  368.00   25.68
  -3  -5   9  353.76   18.10
   3   5  -8   -2.39    6.91
  -3   5   8    7.22    6.98
   3  -5  -8    8.13    5.37
  -3  -5   8   12.91    7.04
  -3   5   7   97.96    9.81
   3   5  -7  206.18    9.75
   3  -5  -7  228.43    6.62
  -3  -5   7  218.79   11.68
   3  -5  -7  141.28    5.41
  -3   5   6    3.96    7.06
   3   5  -6   -4.79    6.48
   3  -5  -6   10.88    6.40
  -3  -5   6    8.10    9.39
   3  -5  -6   -3.39    3.49
   3   5  -5  308.40   12.52
  -3   5   5  193.21   11.71
  -3  -5   5  322.53   11.74
   3  -5  -5  203.51    8.78
  -3   5   4  495.59   21.31
   3   5  -4  493.42   20.71
  -3   5   4  296.47   16.38
   3  -5  -4  529.05   21.53
  -3  -5   4  531.90   22.33
  -3   5   3  410.68   18.26
   3   5  -3  380.52   18.88
  -3   5   3  241.67   14.89
   3  -5  -3  408.68   24.40
  -3  -5   3  440.24   19.77
   3   5  -2 1107.34   33.34
  -3   5   2  681.27   22.25
  -3  -5   2 1186.38   33.97
   3  -5  -2 1146.98   32.10
   3   5  -1 1619.19   53.59
  -3   5   1  991.60   29.51
  -3  -5   1 1798.51   49.58
   3  -5  -1 1751.85   48.10
   3   5   0 2607.21   70.29
  -3   5   0 1628.68   45.19
  -3  -5   0 2958.77   79.20
   3  -5   0 2752.06   73.56
   3   5   1 1151.67   36.58
  -3   5  -1  740.46   23.79
  -3  -5  -1 1374.00   44.24
   3  -5   1 1250.66   35.66
  -3   5  -2  677.88   21.46
   3   5   2 1103.21   33.25
   3  -5   2 1178.53   33.95
   3   5   3   37.98    7.33
   3   5   3   33.78    9.43
  -3   5  -3   25.37    6.28
   3  -5   3   78.39    7.54
   3   5   4  208.25   13.59
   3   5   4  161.25   14.15
  -3   5  -4  136.53   10.52
   3  -5   4  238.15   26.19
   3   5   5    2.51    4.54
   3   5   5   -7.13    8.68
  -3   5  -5   -1.63    6.30
   3  -5   5   14.47    8.01
   3   5   6   -0.09    5.79
   3   5   6    8.57    9.48
  -3   5  -6    4.14    5.85
   3  -5   6    2.47    3.23
   3   5   7   84.11    8.89
   3   5   7   76.60   14.72
  -3   5  -7   43.15    7.96
   3  -5   7  100.04    9.52
   3   5   8    6.06    4.72
   3   5   8    0.36   10.05
  -3   5  -8    1.11    5.37
   3  -5   8   -5.68    9.79
   3   5   9  120.12    8.63
   3   5   9  128.87   11.96
  -3   5  -9   73.62    8.33
   3  -5   9  140.66   10.87
   3   5  10   11.33    9.75
   3   5  10   16.30    7.24
   3  -5  10    6.67    8.18
   3  -5  10    7.53    4.46
   3   5  11   45.31   11.69
   3   5  11   38.51    6.22
   3  -5  11   66.69   10.67
   3  -5  11   55.95   14.74
   3   5  12   53.64    8.57
   3   5  12   53.50    8.28
   3  -5  12   72.16   24.15
   3  -5  12   73.25    8.37
   3   5  13  182.53   13.55
   3   5  13  146.01    6.11
   3  -5  13  232.97   12.59
   3  -5  13  210.71   13.35
   3   5  14    6.84   10.73
   3  -5  14   39.55   11.81
   3  -5  14   13.82    4.65
   3   5  15   34.36   11.03
   3  -5  15   33.91   18.19
   3   5  16    1.66   10.07
   3  -5  16    9.35    7.32
   3   5  17    9.14   10.03
   3  -5  17    2.73    6.84
   3   5  18   -0.73   10.72
   3  -5  18   12.35   10.51
   3   5  19   17.35   10.17
   3  -5  19    3.24    5.83
  -3  -6  21    7.05    7.97
  -3   6  20   32.84    8.45
  -3  -6  20   22.99   10.27
  -3   6  19   -0.01    5.81
  -3  -6  19    2.61    6.46
  -3   6  18   91.18   17.33
  -3  -6  18  133.53   34.50
   3   6 -17   -1.74    4.32
  -3   6  17    2.66    6.12
  -3  -6  17   12.02    8.75
  -3   6  16  146.69   12.81
   3   6 -16  176.21    9.19
  -3  -6  16  240.51   13.90
   3  -6 -16  241.36    9.83
   3   6 -15   11.02    5.04
   3  -6 -15   10.13    6.68
  -3  -6  15    7.30    5.48
   3   6 -14   -0.20    5.62
   3  -6 -14   10.04    7.16
   3  -6 -14   -0.37    4.22
  -3  -6  14   -1.88    7.02
   3   6 -13   76.36    9.47
   3  -6 -13   88.86   30.36
   3  -6 -13   76.50   22.14
  -3  -6  13   75.48    9.33
   3   6 -12  114.61    9.43
   3  -6 -12  136.63   17.85
   3  -6 -12  120.48    8.82
  -3  -6  12  128.02   10.05
   3   6 -11   28.69   12.55
  -3  -6  11   52.63   17.58
   3  -6 -11   40.05   15.43
   3   6 -10    7.42    5.33
  -3   6  10   -2.12    6.37
   3  -6 -10    5.46    4.16
  -3  -6  10   -1.65    8.42
   3   6  -9  350.25   15.73
  -3   6   9  219.40   12.10
   3  -6  -9  416.00   16.46
  -3  -6   9  399.42   24.93
   3   6  -8   39.94   14.60
  -3   6   8   25.18    7.92
   3  -6  -8   49.76   16.85
  -3  -6   8   55.80   10.36
   3   6  -7  749.03   23.55
  -3  -6   7  861.14   26.20
   3  -6  -7  877.48   26.71
   3   6  -6   -2.55    7.18
  -3   6   6    3.22    6.94
   3  -6  -6    7.64    7.81
  -3  -6   6    0.33    7.16
   3   6  -5  914.47   31.47
  -3   6   5  542.43   20.87
   3  -6  -5 1040.52   33.53
  -3  -6   5 1007.32   33.33
   3   6  -4  314.78   13.33
  -3   6   4  203.91   13.94
   3  -6  -4  372.94   15.06
  -3  -6   4  383.47   16.95
   3   6  -3  891.42   30.21
  -3   6   3  545.71   21.80
  -3  -6   3 1019.05   34.09
   3  -6  -3 1000.07   32.51
   3   6  -2  914.03   47.50
  -3   6   2  538.19   20.82
  -3  -6   2  932.20   35.14
   3  -6  -2  964.87   37.48
   3   6  -1 1199.91   39.65
  -3   6   1  768.39   26.90
  -3  -6   1 1402.92   46.63
   3  -6  -1 1389.37   44.23
   3   6   0  652.63   22.87
  -3   6   0  477.46   21.07
  -3  -6   0  838.27   29.22
   3  -6   0  774.78   27.22
   3   6   1 1081.21   35.74
  -3   6  -1  698.84   25.28
  -3  -6  -1 1241.32   44.16
   3  -6   1 1223.04   39.58
   3   6   2  479.88   19.48
  -3   6  -2  320.18   15.48
  -3  -6  -2  547.89   22.01
   3  -6   2  501.75   23.56
   3   6   3  229.87   17.78
  -3   6  -3  135.75    8.90
  -3  -6  -3  281.84   28.00
   3  -6   3  245.23   19.42
   3   6   4  140.06   12.11
   3   6   4   86.63   13.59
  -3   6  -4   89.20   11.59
   3  -6   4  146.93   10.42
   3   6   5   67.85    9.35
   3   6   5   71.23   30.50
   3  -6   5  113.67   10.00
   3   6   6   17.93    4.89
   3   6   6    5.45   10.40
  -3   6  -6   19.86    7.06
   3  -6   6   35.12   11.52
   3   6   7  105.62    8.95
   3   6   7   76.33   10.44
  -3   6  -7   62.80   10.33
   3  -6   7  121.72   13.22
   3   6   8   39.97    7.12
   3   6   8   26.89   10.50
  -3   6  -8   29.07    7.00
   3  -6   8   62.64   13.01
   3   6   9   55.85   18.66
   3   6   9   62.47    9.46
  -3   6  -9   44.03    6.53
   3  -6   9   99.47   16.56
   3   6  10  113.68    8.40
   3   6  10  117.13   12.54
  -3   6 -10   70.94    8.78
   3  -6  10  164.63   14.30
   3   6  11   25.47   13.16
   3   6  11   27.65    7.52
   3  -6  11   23.83   14.76
   3  -6  11   28.10    9.51
   3   6  12    8.30   13.42
   3   6  12    6.89    4.61
   3  -6  12   38.02   11.65
   3  -6  12   14.78    6.46
   3   6  13   13.87    3.65
   3   6  13   15.55    6.57
   3  -6  13   36.94   11.36
   3   6  14   -1.65    6.52
   3  -6  14    0.17    9.58
   3  -6  14    1.59    2.10
   3   6  15   19.85   14.49
   3  -6  15    4.59    8.79
   3   6  16   22.05   10.21
   3  -6  16    6.29   13.97
   3   6  17    5.12   10.24
   3  -6  17    4.43   10.53
   3   6  18    4.41   10.31
   3  -6  18    7.34   11.58
  -3  -7  20    1.41    7.38
   3  -7 -19    0.63    4.26
  -3  -7  19    6.62    7.05
   3  -7 -18  113.04   24.65
  -3  -7  18   95.17   29.27
   3   7 -17   21.39    7.21
  -3  -7  17   25.43   13.18
   3  -7 -17   20.25   10.72
   3   7 -16  117.74    7.64
   3  -7 -16  196.31    8.51
   3  -7 -16  133.38   16.93
  -3  -7  16  159.89   13.44
   3   7 -15   33.38    9.21
   3  -7 -15   26.83   11.02
   3  -7 -15   24.49    9.90
  -3  -7  15   25.62    8.05
   3   7 -14   74.47   12.03
   3  -7 -14   58.56   24.04
   3  -7 -14   67.41    9.11
  -3  -7  14   57.37   19.20
   3   7 -13   -2.31    7.95
   3  -7 -13    7.42    5.94
   3  -7 -13    9.73    5.76
  -3  -7  13   -0.49    8.81
   3   7 -12   -7.23    7.64
  -3  -7  12    5.40    9.09
   3  -7 -12   -0.97    6.60
   3   7 -11    5.71    8.78
  -3   7  11   -0.61    6.32
   3  -7 -11   10.16    7.79
  -3  -7  11    8.04    6.42
   3   7 -10    9.69    9.43
  -3   7  10   -0.65    7.13
   3  -7 -10   -0.06    6.27
  -3  -7  10   -5.45    8.45
   3   7  -9   88.75   26.06
  -3   7   9   46.61    7.83
   3  -7  -9  116.65   12.22
  -3  -7   9  101.16   29.33
   3   7  -8   -3.29   11.32
  -3   7   8   13.45    8.98
   3  -7  -8    9.80   12.17
  -3  -7   8   17.90    8.32
   3   7  -7  294.94   16.02
  -3   7   7  184.84   14.48
   3  -7  -7  358.65   15.01
  -3  -7   7  350.09   11.99
   3   7  -6   -0.65    7.99
  -3   7   6    6.69    7.76
   3  -7  -6   -4.20    6.41
  -3  -7   6    9.32    8.21
   3   7  -5  596.78   24.10
  -3   7   5  394.83   19.21
   3  -7  -5  738.36   26.87
  -3  -7   5  697.86   25.98
   3   7  -4    8.85    9.31
  -3   7   4   17.30   13.57
  -3  -7   4    6.83    6.66
   3  -7  -4    8.13    7.62
   3   7  -3  773.95   29.51
  -3   7   3  552.89   25.80
  -3  -7   3  931.32   33.62
   3  -7  -3  886.34   30.84
   3   7  -2    2.73    9.14
  -3   7   2  -13.66    9.56
   3  -7  -2   16.74   10.03
  -3  -7   2   14.84    9.63
   3   7  -1  446.69   18.74
  -3   7   1  286.42   14.90
  -3  -7   1  493.74   27.30
   3  -7  -1  503.19   17.76
   3   7   0   -1.28    3.49
  -3   7   0    1.28    8.38
  -3  -7   0    1.15    8.77
   3  -7   0   -8.57    7.28
   3   7   1  247.72   27.90
  -3   7  -1  169.51   14.26
  -3  -7  -1  313.25   15.39
   3  -7   1  286.23   13.33
   3   7   2  111.47   11.39
  -3   7  -2   61.00   10.94
  -3  -7  -2  139.39   11.48
   3  -7   2  131.55    9.56
   3   7   3  458.95   19.93
  -3   7  -3  323.85   17.56
  -3  -7  -3  615.86   23.89
   3  -7   3  557.66   26.67
   3   7   4  351.86   26.03
  -3   7  -4  239.45   14.48
  -3  -7  -4  416.22   20.16
   3  -7   4  420.89   19.27
   3   7   5  383.57   17.24
  -3   7  -5  274.68   17.01
  -3  -7  -5  552.88   22.21
   3  -7   5  472.29   17.85
   3   7   6    4.80    7.72
  -3   7  -6    1.99    8.30
  -3  -7  -6    4.99    7.31
   3  -7   6   12.95   13.15
   3   7   7   -0.09    7.07
   3   7   7    0.99    8.27
  -3   7  -7    5.65    9.12
   3  -7   7   -3.74    9.13
   3   7   8  297.82   17.49
   3   7   8  253.33   30.91
  -3   7  -8  197.56   14.54
   3  -7   8  401.50   21.88
   3   7   9   64.42    8.28
   3   7   9   48.00    9.84
  -3   7  -9   46.89   11.46
   3  -7   9   68.44   24.06
   3   7  10  238.55   12.62
   3   7  10  211.81   16.40
  -3   7 -10  164.43   12.25
   3  -7  10  321.51   17.28
   3   7  11   33.90    9.36
   3   7  11   22.70    9.29
  -3   7 -11   31.84    8.38
   3  -7  11   59.77   20.77
   3   7  12   38.64   14.30
   3   7  12   40.62    6.81
   3  -7  12   46.66   25.09
   3  -7  12   42.64   13.55
   3   7  13   26.03   14.42
   3   7  13   -0.16    2.54
   3  -7  13   18.37   11.02
   3  -7  13    4.39    4.13
   3   7  14   29.72   10.39
   3  -7  14   16.67   11.72
   3  -7  14    0.62    4.31
   3   7  15   26.03   13.93
   3  -7  15   -3.58   10.10
   3   7  16   17.78    9.52
   3  -7  16   19.43   10.29
   3   7  17   -8.11    9.95
   3  -7  17   11.31    7.37
  -3  -8  19    5.76    9.69
   3  -8 -18   10.35    9.88
  -3  -8  18   21.20    9.38
   3  -8 -17   94.27   11.09
  -3  -8  17   87.93   14.08
   3   8 -16   51.74   19.35
   3  -8 -16   81.88   16.30
   3  -8 -16   65.78    9.63
  -3  -8  16   61.32   12.47
   3   8 -15   77.14    9.51
   3  -8 -15   83.38   19.34
   3  -8 -15   82.10    9.63
  -3  -8  15   77.77   24.92
   3   8 -14  139.45    9.96
   3  -8 -14  217.47    9.90
   3  -8 -14  191.99    7.77
  -3  -8  14  193.00   10.38
   3   8 -13   45.24   14.13
   3  -8 -13   49.51   17.22
   3  -8 -13   32.16   13.43
  -3  -8  13   35.71    9.09
   3   8 -12  138.08   12.02
  -3   8  12   74.38    9.56
   3  -8 -12  165.23   32.46
  -3  -8  12  147.40   43.07
   3   8 -11   13.98    9.81
  -3   8  11   14.34    6.76
   3  -8 -11   15.13    7.32
  -3  -8  11   19.05    9.06
   3   8 -10   18.44    9.85
  -3   8  10   27.58   11.45
   3  -8 -10   17.16   13.26
  -3  -8  10   29.85    9.23
   3   8  -9   -0.69    9.90
  -3   8   9    3.60    8.56
   3  -8  -9   -6.25    7.80
  -3  -8   9   11.97    5.84
   3   8  -8    6.13   11.10
  -3   8   8    0.23    9.47
   3  -8  -8    5.11    9.11
  -3  -8   8   -0.62    8.60
   3   8  -7  129.85   12.09
  -3   8   7   98.05   12.31
   3  -8  -7  175.56   14.06
  -3  -8   7  155.61    9.84
   3   8  -6   16.27    9.39
  -3   8   6    0.44    8.64
  -3  -8   6   -3.15    9.19
   3  -8  -6    5.48    7.91
   3   8  -5  527.39   28.52
  -3   8   5  389.18   19.01
  -3  -8   5  704.66   26.27
   3  -8  -5  708.09   24.67
   3   8  -4   -2.20   10.12
  -3   8   4    6.94   10.91
   3  -8  -4    3.26    6.79
  -3  -8   4   12.29   14.88
   3   8  -3  403.80   16.27
  -3   8   3  323.19   19.05
  -3  -8   3  517.01   22.60
   3  -8  -3  512.05   26.46
   3   8  -2  184.97   14.37
  -3   8   2  148.45   15.39
   3  -8  -2  248.59   14.62
  -3  -8   2  264.18   17.72
   3   8  -1  193.10   31.01
  -3   8   1  135.44   13.69
  -3  -8   1  237.58   18.26
   3  -8  -1  230.91   14.15
   3   8   0  217.40   17.15
  -3   8   0  135.18   17.76
  -3  -8   0  246.58   16.81
   3  -8   0  259.03   13.92
   3   8   1  128.24   15.03
  -3   8  -1  100.87   13.48
  -3  -8  -1  163.02   20.92
   3  -8   1  131.43   11.49
   3   8   2   18.04    9.36
  -3   8  -2   10.84    9.73
  -3  -8  -2   22.05    9.36
   3  -8   2   11.84    6.03
   3   8   3  218.98   13.97
  -3   8  -3  167.09   14.19
  -3  -8  -3  302.59   13.86
   3  -8   3  273.72   37.84
   3   8   4   51.67   13.82
  -3   8  -4   15.78   11.13
  -3  -8  -4   47.57   11.75
   3  -8   4   55.08   10.60
   3   8   5  228.76   14.07
  -3   8  -5  146.27   14.51
  -3  -8  -5  284.35   11.92
   3  -8   5  297.05   17.89
   3   8   6   -0.01    8.38
  -3   8  -6   18.09   13.95
  -3  -8  -6   24.85   10.86
   3  -8   6   15.37   10.67
   3   8   7   -0.14    7.96
  -3   8  -7   -7.28   10.08
  -3  -8  -7    6.63    8.08
   3  -8   7   18.53    9.84
   3   8   8  162.66    9.57
  -3   8  -8  117.84   12.19
  -3  -8  -8  245.13   14.51
   3  -8   8  204.20   11.90
   3   8   9   76.76   11.18
  -3   8  -9   56.48   10.73
  -3  -8  -9   78.40   26.41
   3  -8   9   80.91   24.04
  -3   8 -10  126.31   11.61
   3   8  10  169.07   17.09
   3  -8  10  224.87   12.21
   3   8  11   27.61    8.07
   3   8  11   25.19   10.21
  -3   8 -11   25.12    8.37
   3  -8  11   44.47   11.55
   3   8  12   69.19    7.69
   3   8  12   64.84   10.62
  -3   8 -12   56.71    7.48
   3  -8  12  106.81   20.00
   3   8  13    5.46    9.82
   3   8  13   14.49    7.01
   3  -8  13   12.77   10.74
   3  -8  13   10.63    6.05
   3   8  14    5.34    9.96
   3  -8  14   39.22   15.68
   3   8  15   12.13    9.06
   3  -8  15   45.67   15.25
   3   8  16    9.10    9.41
   3  -8  16    6.29    5.11
  -3  -9  18    0.51    8.51
   3  -9 -17   99.86   17.67
  -3  -9  17  124.62   24.26
   3   9 -16   15.82    6.35
  -3  -9  16   21.50   12.42
   3  -9 -16   21.82    7.84
   3   9 -15   93.57   18.97
   3  -9 -15  189.19    9.61
   3  -9 -15  146.09    8.67
  -3  -9  15  132.60   40.48
   3   9 -14   35.54   16.95
   3  -9 -14   56.71   24.96
   3  -9 -14   46.00   25.04
  -3  -9  14   56.63   20.08
   3   9 -13   48.64   10.85
  -3  -9  13   72.26   14.80
   3  -9 -13   47.57   17.46
   3   9 -12   29.75   11.15
  -3   9  12    7.44    7.53
   3  -9 -12   11.05   11.43
  -3  -9  12   23.83   14.56
   3   9 -11   16.11    9.90
  -3   9  11   37.93   10.82
   3  -9 -11   16.03   13.77
  -3  -9  11   10.63    9.26
   3   9 -10    1.06    6.82
  -3   9  10   -1.66    8.20
   3  -9 -10    7.13    7.46
  -3  -9  10   -0.14    8.52
   3   9  -9   40.05   10.16
  -3   9   9   16.01    9.12
   3  -9  -9   42.57   18.80
  -3  -9   9   40.69   14.30
   3   9  -8   -6.48   11.29
  -3   9   8   11.42    9.74
   3  -9  -8   12.29   12.68
  -3  -9   8    3.56    9.50
   3   9  -7    6.79   11.40
  -3   9   7   26.16   13.08
   3  -9  -7    5.68    4.11
  -3  -9   7   -1.91    8.13
   3   9  -6   39.62    9.55
  -3   9   6   31.93    8.62
   3  -9  -6   54.35   19.91
  -3  -9   6   58.18   14.84
   3   9  -5  212.23   15.59
  -3   9   5  151.45   15.51
  -3  -9   5  294.95   29.35
   3  -9  -5  275.39   15.09
   3   9  -4   25.94   11.14
  -3   9   4   38.14   15.73
   3  -9  -4   68.68   27.03
  -3  -9   4   77.64   11.23
   3   9  -3  414.77   23.37
  -3   9   3  288.73   21.42
  -3  -9   3  531.11   26.73
   3  -9  -3  467.71   36.08
   3   9  -2   32.08   14.56
  -3   9   2   27.09   13.60
   3  -9  -2   16.30   10.49
  -3  -9   2   29.26    9.36
   3   9  -1  191.26   14.34
  -3   9   1  146.31   14.15
  -3  -9   1  254.42   13.77
   3  -9  -1  256.71   17.22
   3   9   0   20.15   11.15
  -3   9   0   16.78   10.86
  -3  -9   0   18.89    9.20
   3  -9   0   27.36   16.39
   3   9   1   90.80   17.54
  -3   9  -1   65.83   10.90
  -3  -9  -1   98.35   30.28
   3  -9   1  107.71   10.31
   3   9   2   18.69   10.08
  -3   9  -2   18.43   10.06
  -3  -9  -2   22.66   10.37
   3  -9   2   23.04   16.71
   3   9   3   15.60    9.99
  -3   9  -3   11.24   10.35
  -3  -9  -3   29.69   10.84
   3  -9   3   18.15    8.28
   3   9   4    7.96   11.91
  -3   9  -4   -5.73   11.36
  -3  -9  -4    5.55    6.03
   3  -9   4    3.68    7.80
   3   9   5   -5.54    9.52
  -3   9  -5   -6.09   10.56
  -3  -9  -5    7.67   11.07
   3  -9   5    9.62    5.34
   3   9   6   50.13   11.83
  -3   9  -6   31.36   13.54
  -3  -9  -6   55.79   12.56
   3  -9   6   54.13   16.23
   3   9   7   -1.15    8.63
  -3   9  -7    5.01   10.89
  -3  -9  -7   11.21    6.53
   3  -9   7    7.14   11.02
   3   9   8   86.56   13.26
  -3   9  -8   60.56   12.87
  -3  -9  -8   82.65   27.34
   3  -9   8   45.62   11.33
   3   9   9   18.47    6.77
  -3   9  -9   23.48   11.20
  -3  -9  -9   31.32   25.09
   3  -9   9   27.96   12.20
  -3   9 -10   25.58    8.49
   3   9  10   61.58    9.67
  -3  -9 -10  103.86   36.34
   3  -9  10   85.07   30.50
   3   9  11   22.15    6.16
  -3   9 -11   35.86    8.87
  -3  -9 -11   38.81   12.22
   3  -9  11   21.80   11.80
   3   9  12   38.28   10.66
  -3   9 -12   36.01    8.52
  -3  -9 -12   43.62   13.88
   3  -9  12   55.88   18.65
   3   9  13   19.65    5.43
   3  -9  13   32.11   16.64
  -3  -9 -13   22.37   10.22
  -3  -9 -14   12.06    7.59
   3  -9  14   19.21    9.67
   3   9  15   73.30    9.37
   3  -9  15  132.04   16.55
   3  10 -16    2.52    5.20
  -3 -10  16    5.58    9.11
   3 -10 -16    2.21    3.34
   3  10 -15   54.13    9.63
   3 -10 -15   49.77   34.20
   3 -10 -15   40.37   21.82
  -3 -10  15   62.84    8.74
   3  10 -14   12.45   11.48
   3 -10 -14    0.12    6.34
   3 -10 -14    4.30    3.64
  -3 -10  14    3.57    8.96
   3  10 -13   16.94   10.74
  -3  10  13   23.75   10.43
   3 -10 -13   39.37    9.12
  -3 -10  13   70.11   14.37
   3  10 -12   -0.48    7.35
  -3  10  12   18.49   10.28
   3 -10 -12    1.74    6.93
  -3 -10  12    5.25    9.16
   3  10 -11   24.23    8.76
  -3  10  11   19.19   12.37
   3 -10 -11   16.17   10.56
  -3 -10  11   45.70   13.79
   3  10 -10    3.37    9.63
  -3  10  10  -16.26    9.35
   3 -10 -10    0.82    7.33
  -3 -10  10    3.82    4.94
   3  10  -9   69.44   13.34
  -3  10   9   16.19   10.12
   3 -10  -9   64.58   29.52
  -3 -10   9   72.78   22.96
   3  10  -8    1.25   10.95
  -3  10   8   -2.35   10.62
   3 -10  -8    7.50    8.26
  -3 -10   8   26.51   11.44
   3  10  -7   36.66   16.94
  -3  10   7   25.69    9.31
   3 -10  -7   30.59    9.39
  -3 -10   7   17.11    8.76
   3  10  -6   24.49   11.12
  -3  10   6   23.55   14.26
  -3 -10   6   43.13   15.28
   3 -10  -6   12.90   13.58
   3  10  -5   -6.99   10.75
  -3  10   5    4.14   11.48
   3 -10  -5    3.69    7.28
  -3 -10   5    0.74   10.22
   3  10  -4  120.75   16.11
  -3  10   4   64.21   15.93
  -3 -10   4  111.13   37.80
   3 -10  -4  121.32   38.90
   3  10  -3  140.53   13.53
  -3  10   3   78.50   14.52
  -3 -10   3  144.44   10.81
   3 -10  -3  173.15   14.18
   3  10  -2    6.92    5.14
  -3  10   2   -4.64    9.89
   3 -10  -2    1.77   10.19
  -3 -10   2    7.57    9.15
   3  10  -1  133.64   14.69
  -3  10   1  118.97   15.79
  -3 -10   1  212.77   33.93
   3 -10  -1  169.35   15.67
   3  10   0   63.94   26.16
  -3  10   0   73.36   20.05
  -3 -10   0   95.92   11.84
   3 -10   0  104.21   15.66
  -3  10  -1   37.61   15.53
   3 -10   1   39.00   11.03
  -3 -10  -1   67.17   10.73
   3  10   2   10.77   10.97
  -3  10  -2    5.31   10.65
  -3 -10  -2    7.67    6.59
   3 -10   2    8.08   16.75
   3  10   3    9.41    9.23
  -3  10  -3   -0.40   11.35
  -3 -10  -3    7.49    8.06
   3 -10   3   -0.12    5.90
   3  10   4   37.92    9.72
  -3  10  -4   39.36   16.46
  -3 -10  -4   51.79   18.84
   3 -10   4   56.79   10.81
   3  10   5   40.41   14.12
  -3  10  -5   35.31   14.10
  -3 -10  -5   32.56   11.60
   3 -10   5   34.17   13.33
   3  10   6    0.83    9.23
  -3  10  -6    9.37    9.27
  -3 -10  -6   13.23    8.74
   3 -10   6    0.29   10.70
   3  10   7   27.93    9.12
  -3  10  -7   17.20    9.71
  -3 -10  -7   23.72   10.49
   3 -10   7   40.36   17.47
  -3  10  -8    0.49    8.15
   3  10   8    9.41    8.00
  -3 -10  -8    2.04    4.87
   3 -10   8    7.31    8.86
   3  10   9   59.17   10.82
  -3  10  -9   41.64   10.26
  -3 -10  -9   58.92   26.79
   3 -10   9   53.91   11.14
  -3  10 -10   -5.04    7.53
   3  10  10    8.13    7.02
  -3 -10 -10    9.90    9.10
   3 -10  10    0.94    8.08
   3  10  11   43.64    9.59
  -3  10 -11   28.07    7.57
  -3 -10 -11   54.96   22.88
   3 -10  11   43.38   23.65
   3  10  12    9.31    5.98
  -3  10 -12    5.80    6.48
  -3 -10 -12    3.66   11.25
   3 -10  12   18.80   12.39
  -3 -10 -13   67.13   26.82
   3 -10  13   72.73   31.99
   3  11 -14   -4.70    7.06
   3 -11 -14    6.54    6.37
   3 -11 -14   -4.22    5.76
  -3 -11  14  -11.90    8.02
   3  11 -13   70.84   11.09
  -3 -11  13  108.72   13.45
   3 -11 -13  116.15   12.07
   3  11 -12  -10.73    8.34
  -3  11  12    2.46    4.71
   3 -11 -12    3.62    5.68
  -3 -11  12   -1.85   10.23
   3  11 -11   28.01   13.10
  -3  11  11   14.96    8.72
   3 -11 -11   60.38   31.73
  -3 -11  11   66.12   14.03
   3  11 -10    1.92    6.03
  -3  11  10    0.60   10.04
   3 -11 -10   -4.11    6.84
  -3 -11  10    5.59    9.73
   3  11  -9   12.85   12.88
  -3  11   9   18.26    9.32
   3 -11  -9    5.64    6.85
  -3 -11   9    6.71    9.26
   3  11  -8    6.65   10.18
  -3  11   8    0.57    9.60
   3 -11  -8    2.53    5.47
  -3 -11   8    2.30   10.16
   3  11  -7    9.57   11.90
  -3  11   7   13.17    9.17
   3 -11  -7   -1.71    7.57
  -3 -11   7    6.51   10.52
   3  11  -6    1.94   10.67
  -3  11   6   14.13   10.58
  -3 -11   6   25.20   10.72
   3 -11  -6    7.02    8.82
   3  11  -5    3.09   10.25
  -3  11   5   15.07   11.57
  -3 -11   5    8.40    6.04
   3 -11  -5   -5.03    9.07
  -3  11   4   14.72   11.65
  -3 -11   4   24.23   13.02
   3 -11  -4   25.49   16.25
   3  11  -3   -8.00   11.85
  -3  11   3    5.70   10.55
   3 -11  -3   18.43    8.83
  -3 -11   3   10.83    4.12
   3  11  -2  -12.18   11.65
  -3  11   2    4.61   10.53
   3 -11  -2   -0.53    8.67
  -3 -11   2    5.59   10.30
   3  11  -1   55.38   11.37
  -3  11   1   50.22   11.49
  -3 -11   1   76.54   29.94
   3 -11  -1   84.03   15.15
   3  11   0   25.36   10.28
  -3  11   0   15.98   11.37
  -3 -11   0   66.21   23.37
   3 -11   0   59.04   16.09
   3  11   1   45.92   16.66
  -3  11  -1   41.27   11.03
  -3 -11  -1   56.97   28.43
   3 -11   1   31.17   23.39
   3  11   2    1.30   11.28
  -3  11  -2    7.63   10.37
  -3 -11  -2   -1.69    5.00
   3 -11   2   -5.38   10.80
   3  11   3   -0.76    9.46
  -3  11  -3    4.75   10.96
  -3 -11  -3   -5.75    9.82
   3 -11   3   -5.76   10.35
   3  11   4   22.44    9.33
  -3  11  -4   20.43   11.84
  -3 -11  -4   54.34   15.89
   3 -11   4   28.50    9.78
   3  11   5    3.49    7.49
  -3  11  -5   38.66   14.17
  -3 -11  -5   21.25    9.38
   3 -11   5   23.10   13.24
  -3  11  -6   11.15    8.94
   3  11   6   -1.57    9.45
  -3 -11  -6   11.81   11.58
   3 -11   6   -6.11    9.74
  -3  11  -7   20.28   12.56
   3  11   7   19.05   10.07
  -3 -11  -7   33.99   10.69
   3 -11   7   34.83    9.87
  -3  11  -8    5.22    8.23
   3  11   8   -4.04    8.36
  -3 -11  -8    6.34    7.45
   3 -11   8    9.43   10.02
   3  11   9   19.67    8.99
  -3  11  -9   13.41    7.70
  -3 -11  -9   42.24   15.73
   3 -11   9   24.98   11.81
  -3  11 -10    3.68    7.26
   3  11  10   12.67   11.37
  -3 -11 -10    2.70    5.30
   3 -11  10    2.46   11.54
   3  11  11   29.20    9.39
  -3  11 -11   28.46   10.03
  -3 -11 -11   23.93   14.07
   3 -11  11   27.66   16.38
   3  12 -11   51.75   13.53
  -3  12  11   33.09   12.28
   3 -12 -11   63.69    9.49
  -3 -12  11   61.99   11.60
   3  12 -10    9.93    9.14
  -3  12  10   20.74   12.54
   3 -12 -10   10.05    7.25
  -3 -12  10    9.36   12.66
  -3  12   9    6.04    8.33
   3  12  -9   16.26    8.75
   3 -12  -9   10.37    7.97
  -3 -12   9   -0.67    9.03
   3  12  -8    7.33    8.02
  -3  12   8  -15.37    9.25
   3 -12  -8    8.87    9.74
  -3 -12   8    5.35    9.52
   3  12  -7   -0.14   16.22
  -3  12   7   21.79   10.66
   3 -12  -7   53.90   11.72
  -3 -12   7   54.77   13.72
   3  12  -6   -2.07    7.88
  -3  12   6    7.75   10.66
  -3 -12   6   11.95   10.22
   3 -12  -6    6.26    3.94
   3  12  -5    7.78   11.54
  -3  12   5   -1.52   10.34
  -3 -12   5   29.71   11.37
   3 -12  -5   22.62   13.56
   3  12  -4  -15.03    9.44
  -3  12   4    0.59   11.07
   3 -12  -4   20.88    8.47
  -3 -12   4   16.18   11.43
   3  12  -3   -4.80   10.38
  -3  12   3    1.95   11.72
  -3 -12   3   18.34   12.40
   3 -12  -3   17.21   10.79
   3  12  -2   -8.74   11.40
  -3  12   2    6.66   11.73
   3 -12  -2    5.54    8.42
  -3 -12   2    4.58    8.29
   3  12  -1   20.31   12.30
  -3  12   1    7.96   11.08
  -3 -12   1   33.83   14.98
   3 -12  -1   20.25    9.00
   3  12   0    8.80   11.69
  -3  12   0   -0.47   10.01
  -3 -12   0    2.63    6.12
   3 -12   0    7.57    6.19
   3  12   1   19.92   12.67
  -3  12  -1   19.16   13.69
  -3 -12  -1   29.77    9.26
   3 -12   1   21.72   13.64
   3  12   2   10.06    8.56
  -3  12  -2    0.65   10.33
  -3 -12  -2    9.45    5.20
   3 -12   2   -1.18   10.75
  -3  12  -3   24.73   16.01
   3  12   3   16.60    9.82
  -3 -12  -3   29.99   12.93
   3 -12   3    6.88    8.50
   3  12   4   28.11   10.29
  -3  12  -4   -4.41   10.36
  -3 -12  -4   10.73    8.74
   3 -12   4    4.27   10.83
   3  12   5   11.39    9.11
  -3  12  -5   13.99   12.31
  -3 -12  -5    2.41    9.40
   3 -12   5    5.47    8.97
  -3  12  -6   13.60    8.55
   3  12   6   -0.47    8.94
  -3 -12  -6    8.23    7.87
   3 -12   6   -3.18    8.69
   3  12   7   15.27    9.41
  -3  12  -7   13.99   13.43
  -3 -12  -7   17.39   12.60
   3 -12   7    1.64    6.53
  -3  12  -8    4.92    9.16
   3  12   8    8.18    8.47
  -3 -12  -8    7.91    9.34
   3 -12   8   12.10   10.57
   3  13  -6    5.64   11.67
  -3  13   6   16.81   10.77
   3 -13  -6   -3.21    8.88
  -3 -13   6    4.78    7.92
  -3  13   5   23.68    9.79
   3  13  -5   19.82   11.21
  -3 -13   5   14.37   11.19
   3  13  -4   -6.01   10.87
  -3  13   4    4.48   10.28
   3 -13  -4   15.28   12.14
  -3 -13   4   19.47   11.45
   3  13  -3   14.35   11.26
  -3  13   3   35.71   11.99
   3 -13  -3   18.35   13.95
  -3 -13   3   10.22   13.25
  -3  13   2   -9.05   11.89
   3  13  -2   20.41   11.95
  -3 -13   2    2.54    7.24
   3 -13  -2   -3.37    8.92
   3  13  -1   25.88   12.40
  -3  13   1   27.41   16.21
  -3 -13   1   35.86   13.31
   3 -13  -1   21.78    9.12
  -3  13   0   -4.92   10.81
   3  13   0  -11.44   11.61
  -3 -13   0   15.70    9.21
   3 -13   0   -6.90    9.58
  -3  13  -1   35.29   10.44
   3  13   1   32.60   14.37
  -3 -13  -1   15.50    8.38
   3 -13   1   41.68   14.92
   3  13   2   34.77   14.53
  -3  13  -2    3.32   10.41
  -3 -13  -2    5.50   10.39
   3 -13   2   14.28    9.70
  -3  13  -3   23.72   11.25
   3  13   3   19.74   11.11
  -3 -13  -3   12.39    7.95
   3 -13   3   26.35   11.05
  -4   0  22   61.38   11.22
  -4   0  21   -9.19    5.64
  -4   0  20  306.29    9.79
  -4   0  19   -0.63    5.93
  -4   0  18  200.67   11.36
  -4   0  17   -6.38    5.91
   4   0 -17   -2.53    1.52
  -4   0  16  114.44   12.19
   4   0 -16  112.55    4.80
  -4   0  15    2.47    5.51
  -4   0  15    1.17    1.12
   4   0 -15   -0.36    1.37
   4   0 -14   47.53    4.13
  -4   0  14   56.57    5.53
  -4   0  14   48.86    7.96
   4   0 -14   51.45    6.63
   4   0 -13    0.01    2.36
  -4   0  13   -4.96    3.85
  -4   0  13   -0.06    1.40
   4   0 -13    2.96    1.78
   4   0 -12   71.25    3.43
  -4   0  12   78.92    4.84
  -4   0  12   81.35    4.55
   4   0 -12   77.48    5.86
   4   0 -11   -1.49    2.51
  -4   0  11   -1.18    3.04
  -4   0  11   -1.16    1.50
   4   0 -11    0.62    5.32
   4   0 -10  158.09    6.28
  -4   0  10  145.27    6.39
  -4   0  10  142.57    5.83
   4   0 -10  146.59    8.28
   4   0  -9    0.25    1.40
  -4   0   9    0.16    1.34
  -4   0   9   -4.75    2.81
   4   0  -9   -0.32    6.26
   4   0  -8 1044.99   25.36
  -4   0   8  976.93   24.64
  -4   0   8 1002.87   25.50
   4   0  -8 1058.80   27.83
   4   0  -7   -0.92    1.09
  -4   0   7    0.59    1.07
  -4   0   7   -0.85    3.25
   4   0  -7   -0.94    5.81
   4   0  -6 6710.43  108.21
  -4   0   6 6263.86  101.04
  -4   0   6 5894.73   96.34
   4   0  -6 6201.32  101.60
  -4   0   5   -0.80    0.60
  -4   0   5   -0.93    4.57
   4   0  -5   -3.45    7.34
  -4   0   4 4151.30   67.62
   4   0  -4 3183.37   51.63
  -4   0   4 4304.76   70.93
   4   0  -4 4578.79   76.12
  -4   0   3   -4.26    3.24
   4   0  -3   -6.10    4.06
  -4   0   3   -5.85    6.26
   4   0  -3  -17.57   11.47
  -4   0   2   39.15    4.42
   4   0  -2   50.24   20.51
   4   0  -2   43.05   27.10
  -4   0   1   -1.05    4.83
   4   0  -1   -2.64    6.80
  -4   0   1   -6.74    6.16
   4   0  -1  -15.76   11.69
   4   0   0  741.52   26.31
  -4   0   0  755.84   24.99
  -4   0   0  801.96   27.66
   4   0   0  791.41   29.05
   4   0   1   -3.16    6.98
  -4   0  -1   -3.41    5.37
  -4   0  -1   -4.02    5.54
   4   0   1   -0.31    7.40
   4   0   2  958.29    9.70
  -4   0  -2  962.23    9.14
  -4   0  -2  993.72    8.87
   4   0   2  988.31    8.23
   4   0   3   -6.72    7.96
  -4   0  -3    0.65    4.79
  -4   0  -3   -1.53    4.34
   4   0   3    3.37    3.70
   4   0   4 1606.90   41.11
  -4   0  -4 1546.68   38.74
  -4   0  -4 1591.91   39.00
   4   0   4 1601.82   42.81
   4   0   5    4.23    9.21
  -4   0  -5   -0.70    3.32
   4   0   5   -1.69    5.66
   4   0   6  671.78   27.89
  -4   0  -6  701.80   26.42
   4   0   6  688.82   26.12
   4   0   7   -9.60    9.87
  -4   0  -7   -0.67    1.42
   4   0   7   -8.47    3.14
   4   0   8  744.41   27.22
  -4   0  -8  780.97   24.20
   4   0   8  790.71   24.77
   4   0   9   13.25   10.89
   4   0   9   -0.61    2.56
   4   0  10 1013.98   53.48
   4   0  10 1111.83   35.29
   4   0  10  596.96   19.35
   4   0  11    2.93   12.04
   4   0  11   -0.56    1.15
   4   0  11    0.05    0.97
   4   0  12 1028.87   34.97
   4   0  13   -7.86   11.24
   4   0  14  602.94   20.91
   4   0  15   -9.88   10.67
   4   0  16  101.03   14.48
   4   0  17   -4.78   10.13
   4   0  18   49.98   14.94
   4   0  19   -7.10   10.07
   4   0  20   39.06    9.92
  -4  -1  22   55.97   10.69
  -4   1  21   11.47    7.53
  -4  -1  21   10.94    8.25
  -4   1  20  162.09    7.94
  -4  -1  20  154.59    8.44
  -4   1  19   35.03   11.31
  -4  -1  19   34.52   13.84
  -4   1  18  267.45   27.40
  -4  -1  18  315.37   15.06
  -4   1  17   -0.54    5.55
   4   1 -17    1.56    1.98
  -4  -1  17   -0.73    5.98
   4  -1 -17    0.32    1.27
   4   1 -16  331.09   11.22
  -4   1  16  285.14   23.45
  -4  -1  16  343.59   27.67
   4  -1 -16  330.08   11.31
  -4  -1  16  303.09    9.96
   4   1 -15   59.60    8.91
  -4   1  15   48.18    7.12
  -4  -1  15   60.93   15.20
   4  -1 -15   70.40   13.49
  -4  -1  15   50.88    6.65
   4  -1 -15   35.91    3.79
   4   1 -14   15.16    9.65
  -4   1  14   22.48    6.46
  -4  -1  14   16.50    6.06
  -4  -1  14   15.60    4.47
   4  -1 -14   13.92    5.36
   4  -1 -14   11.10    3.51
   4  -1 -14    9.52    2.89
   4   1 -13  210.98    9.72
   4   1 -13  224.24   10.49
  -4   1  13  186.28    9.29
  -4  -1  13  225.20   10.99
  -4  -1  13  204.31    9.62
   4  -1 -13  224.78   11.42
   4  -1 -13  214.60   10.95
   4  -1 -13  103.83    5.42
   4   1 -12   34.58   10.68
  -4   1  12   28.95    4.41
   4   1 -12   42.57   14.01
  -4   1  12   35.23    9.36
   4  -1 -12   34.42    4.24
  -4  -1  12   33.90    3.77
   4  -1 -12   41.89   14.63
  -4  -1  12   50.71   10.96
   4   1 -11  141.44    5.37
  -4   1  11  118.17    4.02
   4   1 -11  142.28    6.99
  -4   1  11  142.45    5.26
  -4  -1  11  146.82    5.98
  -4  -1  11  127.26    4.59
   4  -1 -11  143.13    7.20
   4  -1 -11  131.70    3.85
   4   1 -10    4.70    3.43
  -4   1  10   -1.98    2.41
   4   1 -10    4.88    5.48
  -4   1  10   -0.09    2.68
  -4  -1  10    2.53    3.32
   4  -1 -10    4.10    5.41
  -4  -1  10    4.03    2.98
   4  -1 -10    2.87    2.31
   4   1  -9   29.11   10.13
  -4   1   9   26.61    3.69
   4   1  -9   31.03   19.20
  -4   1   9   25.78    9.17
  -4  -1   9   29.69   13.28
  -4  -1   9   27.44    9.70
   4  -1  -9   32.50   18.61
   4  -1  -9   32.75    8.00
   4   1  -8 1245.62   30.44
  -4   1   8  929.23   22.65
   4   1  -8 1269.50   32.71
  -4   1   8 1172.43   29.09
   4  -1  -8 1162.58   28.00
   4  -1  -8 1223.37   42.15
  -4  -1   8 1153.76   29.47
  -4  -1   8 1155.94   28.53
   4   1  -7    7.56    5.09
   4   1  -7    4.25    6.44
  -4   1   7   11.74    3.36
  -4   1   7    7.24    1.76
   4  -1  -7   10.19    2.64
   4  -1  -7    9.77    5.61
  -4  -1   7   12.77    4.40
  -4  -1   7   11.07    3.22
   4   1  -6 2609.91   42.80
   4   1  -6 2459.75   42.28
  -4   1   6 2398.87   40.28
  -4  -1   6 2470.17   40.67
  -4  -1   6 2342.52   39.67
   4  -1  -6 2365.86   40.39
   4   1  -5   22.30    8.83
  -4   1   5   25.23   10.36
  -4  -1   5   26.61    4.96
   4  -1  -5   28.45    6.27
  -4  -1   5   44.69   13.00
  -4  -1   5   46.76    8.39
  -4   1   4  585.17   24.71
  -4   1   4  624.76   20.17
   4   1  -4  633.26   24.47
  -4  -1   4  457.80   15.30
  -4  -1   4  652.46   21.33
   4  -1  -4  600.72   24.14
   4  -1  -4  595.55   19.03
  -4  -1   4  582.25   19.64
  -4   1   3   57.29    8.20
   4   1  -3   29.45   20.64
  -4   1   3   56.34    4.55
   4   1  -3   39.27    6.72
  -4  -1   3   45.97    5.89
   4  -1  -3   58.14   26.83
   4  -1  -3   48.73    4.48
  -4  -1   3   51.27    5.56
  -4   1   2  307.65   10.65
   4   1  -2  225.46   10.55
  -4   1   2  296.00   19.61
   4   1  -2  283.13   14.50
  -4  -1   2  250.97   10.04
   4  -1  -2  290.03   10.86
  -4  -1   2  284.37   11.08
  -4   1   1 4084.61   66.79
   4   1  -1 4350.83   72.77
  -4   1   1 4212.06   69.37
   4   1  -1 3431.06   56.92
  -4  -1   1 3420.11   59.33
   4  -1  -1 4179.11   75.21
   4  -1  -1 4133.88   67.76
  -4  -1   1 4077.29   67.25
  -4   1   0   -0.51    4.25
   4   1   0   -2.92   10.28
   4   1   0   -4.01    7.42
  -4   1   0   -2.20    4.92
   4  -1   0    0.88    5.50
  -4  -1   0   -1.48    6.32
  -4  -1   0   -0.62    6.21
   4  -1   0    1.55    7.33
  -4   1  -1  252.96    9.37
   4   1   1  261.22   19.52
  -4   1  -1  255.08    9.94
   4   1   1  223.00   14.63
   4  -1   1  238.29   12.05
   4  -1   1  262.61   13.01
  -4  -1  -1  215.24    8.46
  -4  -1  -1  236.35   11.33
  -4   1  -2 1638.08   28.47
   4   1   2 1471.41   27.43
   4   1   2 1661.88   29.16
  -4   1  -2 1680.63   28.91
   4  -1   2 1666.75   30.01
   4  -1   2 1678.50   29.32
  -4  -1  -2 1603.62   28.07
  -4  -1  -2 1513.42   26.47
  -4   1  -3  149.41   15.82
   4   1   3  134.98   10.73
   4   1   3  168.77   10.35
  -4   1  -3  157.16    9.21
   4  -1   3  155.77   12.75
  -4  -1  -3  148.67   14.77
   4  -1   3  168.17   18.06
  -4  -1  -3  137.06    8.14
   4   1   4 1427.67   37.68
   4   1   4 1262.26   33.72
  -4   1  -4 1358.65   33.37
   4  -1   4 1360.21   33.99
  -4  -1  -4 1328.03   32.71
   4  -1   4 1320.64   40.63
   4   1   5  248.97   10.39
   4   1   5  224.59   13.98
  -4   1  -5  242.25    8.20
   4  -1   5  245.74   10.61
  -4  -1  -5  228.63    9.91
   4  -1   5  250.69   15.30
   4   1   6  367.25   19.27
   4   1   6  286.80   29.79
  -4   1  -6  368.21   14.76
   4  -1   6  358.74   14.69
  -4  -1  -6  345.97    6.33
   4  -1   6  327.15   12.97
   4   1   7  608.61   20.30
   4   1   7  522.99   19.73
   4  -1   7  579.72   23.63
  -4  -1  -7  559.83   19.80
   4  -1   7  574.91   19.47
   4  -1   7  312.61   11.31
   4   1   8  758.01   23.71
   4   1   8  606.11   21.87
   4  -1   8  723.56   26.93
   4  -1   8  724.84   23.59
  -4  -1  -8  690.96   22.05
   4  -1   8  407.99    5.80
   4   1   9   96.08    9.01
   4   1   9  102.79   34.21
   4  -1   9  110.74   39.79
   4  -1   9   98.44   11.30
  -4  -1  -9   88.04    3.68
   4  -1   9   59.13    3.78
   4   1  10  869.38   27.84
   4   1  10  752.03   27.56
   4  -1  10  785.44   28.25
   4  -1  10  811.50   26.15
  -4  -1 -10  835.70   26.88
   4  -1  10  553.69   18.05
   4   1  11   19.96   12.16
   4  -1  11    4.19   11.74
   4  -1  11    8.03    3.19
   4  -1  11    4.71    2.19
   4   1  12 1080.54   37.10
   4  -1  12 1206.26   40.35
   4  -1  12 1250.50   35.21
   4  -1  12 1068.73   30.12
   4   1  13   12.35   10.90
   4  -1  13   18.16   13.35
   4   1  14  256.04   25.44
   4  -1  14  280.24   28.50
   4   1  15   31.18   10.44
   4  -1  15   29.64   13.88
   4   1  16   34.55   10.50
   4  -1  16   25.97   10.16
   4   1  17   13.47   10.19
   4  -1  17   23.28   10.27
   4   1  18   30.43   11.32
   4  -1  18   34.44   11.29
   4   1  19    7.80    9.86
   4  -1  19   -6.77   10.53
   4   1  20   38.98   18.07
   4  -1  20   60.18   10.12
  -4  -2  22   40.26   16.51
  -4   2  21   25.33    7.45
  -4  -2  21   12.29    8.13
  -4   2  20   15.84    5.12
  -4  -2  20   27.85    7.26
  -4   2  19  195.35   17.96
  -4  -2  19  233.71   10.26
  -4   2  18   91.10   23.72
  -4  -2  18  105.95   25.98
  -4   2  17   78.84   16.26
   4   2 -17   94.00    5.69
  -4  -2  17  101.49   25.41
   4  -2 -17   96.60    5.51
  -4   2  16  160.50    7.38
   4   2 -16  195.28    5.62
  -4  -2  16  190.60   14.70
   4  -2 -16  204.09    6.72
   4   2 -15   17.26    5.43
  -4   2  15   11.74    4.78
  -4  -2  15   33.45    9.80
   4  -2 -15   22.92   10.09
  -4  -2  15   13.51    3.49
   4  -2 -15   10.19    3.49
   4   2 -14   89.50    6.42
  -4   2  14   73.22    6.60
  -4  -2  14   93.69    7.58
  -4  -2  14   97.67    5.17
   4  -2 -14  103.78    6.20
   4  -2 -14   93.27    7.70
   4  -2 -14   56.61    5.85
   4   2 -13   24.49    7.74
  -4   2  13   22.63    5.34
  -4  -2  13   11.17    6.09
  -4  -2  13   16.25    3.94
   4  -2 -13   21.12   10.10
   4  -2 -13   11.28    4.44
   4  -2 -13    4.64    2.19
   4   2 -12   95.97    5.60
   4   2 -12   97.08    5.34
  -4   2  12   75.00    4.57
   4  -2 -12   85.63    7.83
   4  -2 -12   93.70    6.63
  -4  -2  12   76.56    8.85
  -4  -2  12  103.94   13.36
   4  -2 -12   62.20    5.78
   4   2 -11    1.49    1.63
   4   2 -11    2.71    2.76
  -4   2  11   -0.61    2.84
   4  -2 -11    3.95    2.50
   4  -2 -11    4.96    5.67
  -4  -2  11    1.86    3.04
  -4  -2  11    2.56    2.93
   4  -2 -11   -0.29    3.50
   4   2 -10 2201.19   58.82
   4   2 -10 2274.33   60.72
  -4   2  10 1536.95   40.86
   4  -2 -10 2002.58   52.89
   4  -2 -10 2106.56   57.35
  -4  -2  10 2015.06   53.71
  -4  -2  10 2142.98   58.66
   4  -2 -10 1093.86   30.29
   4   2  -9   63.05    6.96
   4   2  -9   55.48    8.32
  -4   2   9   40.21    4.16
   4  -2  -9   52.02    4.43
   4  -2  -9   54.05    7.40
  -4  -2   9   49.96    4.57
  -4  -2   9   58.69    6.64
   4  -2  -9   23.00    8.26
   4   2  -8 1546.97   41.34
   4   2  -8 1577.58   42.99
   4  -2  -8 1313.87   35.21
  -4  -2   8 1476.12   40.03
  -4  -2   8 1414.92   38.47
   4  -2  -8 1527.09   41.48
  -4   2   7   62.29    4.46
   4   2  -7   63.34    4.69
   4   2  -7   89.46   10.07
   4  -2  -7   53.35    3.85
   4  -2  -7   73.99   23.33
   4  -2  -7   70.91    6.90
  -4  -2   7   63.50   13.56
  -4  -2   7   81.40    9.47
   4   2  -6  168.96    9.79
  -4   2   6  153.68    9.34
   4   2  -6  157.40   10.14
  -4  -2   6  157.74   16.33
   4  -2  -6  158.56   12.04
   4  -2  -6  118.09    6.21
  -4  -2   6  144.26   11.06
   4  -2  -6  160.55    8.18
  -4   2   5   49.29    3.07
   4   2  -5   54.86    4.25
   4   2  -5   46.80    9.01
  -4   2   5   47.38    3.97
   4  -2  -5   53.07    3.46
   4  -2  -5   49.92    7.47
  -4  -2   5   53.41   14.64
  -4  -2   5   45.99    4.63
  -4   2   4  398.47   13.91
  -4   2   4  422.17   13.96
   4   2  -4  401.42   15.40
  -4  -2   4  263.82    9.94
   4  -2  -4  401.44   14.74
  -4  -2   4  418.63   14.38
  -4  -2   4  366.01   17.03
   4  -2  -4  395.87   13.16
   4   2  -3  175.78   11.37
  -4   2   3  164.29    6.86
  -4   2   3  167.97    7.03
  -4  -2   3  118.48    6.30
  -4  -2   3  186.52    8.43
   4  -2  -3  158.89    8.12
  -4  -2   3  160.31    8.45
   4  -2  -3  175.46    7.22
  -4   2   2  536.67   17.91
   4   2  -2  550.68   19.33
   4   2  -2  381.87   14.19
  -4   2   2  552.55   18.86
  -4  -2   2  402.06   14.14
  -4  -2   2  545.49   19.69
   4  -2  -2  549.85   18.29
  -4   2   1  904.73   29.30
   4   2  -1  682.28   23.66
   4   2  -1  938.29   36.17
  -4   2   1  878.19   28.75
   4  -2  -1  903.40   29.51
   4  -2  -1  914.64   30.51
  -4  -2   1  878.85   29.19
  -4  -2   1  700.00   23.48
  -4   2   0   52.07    3.77
   4   2   0   45.01   10.25
   4   2   0   60.91    7.23
  -4   2   0   54.03    4.24
   4  -2   0   36.72   16.84
   4  -2   0   65.00   21.85
  -4  -2   0   61.11    6.71
  -4  -2   0   49.23    6.35
  -4   2  -1    7.71    4.71
   4   2   1   20.79   10.74
   4   2   1   16.18    8.88
  -4  -2  -1   10.35    5.05
   4  -2   1   -2.46    6.47
  -4  -2  -1   15.42    9.08
   4  -2   1   13.65   10.37
  -4   2  -2  273.11   13.62
   4   2   2  300.16   16.16
   4   2   2  213.17   14.80
  -4  -2  -2  229.41   11.81
   4  -2   2  286.22   14.86
  -4  -2  -2  293.88   15.94
   4  -2   2  273.76   15.80
   4  -2   2  144.05    8.65
   4   2   3   16.56    8.15
  -4   2  -3    2.88    4.58
   4   2   3    3.75    5.79
   4  -2   3    2.74    4.85
  -4  -2  -3   -1.56    6.83
  -4  -2  -3    6.29    5.04
   4  -2   3    4.79    3.16
   4  -2   3    1.38    4.09
   4   2   4   56.95    5.55
   4   2   4   37.52    9.67
   4  -2   4   42.53    8.81
  -4  -2  -4   62.69    6.21
   4  -2   4   73.09   22.02
   4  -2   4   35.92    4.45
   4   2   5  381.06   16.54
   4   2   5  310.96   15.41
   4  -2   5  379.90   16.66
  -4  -2  -5  339.80    7.24
   4  -2   5  367.64   15.32
   4  -2   5  202.96    7.73
   4   2   6  672.40   26.10
   4   2   6  531.07   24.32
   4  -2   6  638.74   37.14
  -4  -2  -6  601.80   23.16
   4  -2   6  647.62   28.76
   4  -2   6  378.15   15.37
   4   2   7 1308.65   40.22
   4   2   7 1119.33   37.93
   4  -2   7 1261.21   41.06
  -4  -2  -7 1208.46   38.37
   4  -2   7 1280.08   40.19
   4  -2   7  776.28   24.50
   4   2   8 1372.55   36.20
   4   2   8 1110.37   33.68
   4  -2   8 1342.01   38.80
   4  -2   8 1346.49   38.78
  -4  -2  -8 1291.31   33.94
   4  -2   8  883.53   26.30
   4   2   9  152.96    6.64
   4   2   9  145.26   14.18
   4  -2   9  152.67   11.80
   4  -2   9  147.90    7.48
  -4  -2  -9  136.86    5.12
   4  -2   9  107.16    5.27
   4   2  10  501.90   19.29
   4   2  10  461.35   21.75
   4  -2  10  543.45   24.50
  -4  -2 -10  476.46   15.78
   4  -2  10  524.69   18.90
   4  -2  10  370.81   12.84
   4   2  11   78.03    6.14
   4   2  11   79.56   12.03
   4  -2  11  100.03   36.31
   4  -2  11   95.96    9.89
  -4  -2 -11   91.11    6.62
   4  -2  11   73.13    3.43
   4   2  12  128.48   11.92
   4   2  12  117.67    3.81
   4  -2  12  135.05   40.20
   4  -2  12  144.35    5.31
   4   2  13  156.81   15.19
   4  -2  13  214.00   15.72
   4  -2  13  181.83    3.92
   4   2  14   51.41   19.99
   4  -2  14   53.04   17.67
   4   2  15   24.33   10.14
   4  -2  15   30.85   10.98
   4   2  16    1.19    4.95
   4  -2  16   14.79   10.63
   4   2  17    6.15   11.02
   4  -2  17    8.38    8.66
   4   2  18   23.25   15.00
   4  -2  18   15.64   10.45
   4   2  19   -6.45    9.13
   4  -2  19  -10.67   10.65
   4   2  20    4.81    9.73
   4  -2  20   12.49    9.53
  -4  -3  23   40.76    8.09
  -4  -3  22   13.14    6.38
  -4   3  21   42.68   10.56
  -4  -3  21   50.80   12.64
  -4   3  20   -1.42    4.80
  -4  -3  20   -4.01    6.47
  -4   3  19  109.56    7.63
  -4  -3  19  145.18   13.96
  -4   3  18   14.37    6.77
  -4  -3  18    5.25    4.22
  -4   3  17   53.60    7.48
   4   3 -17   57.84    8.94
  -4  -3  17   65.92   25.15
   4  -3 -17   67.72   12.27
  -4   3  16  100.41    7.14
   4   3 -16  110.61   13.50
  -4  -3  16  152.97    9.21
   4  -3 -16  133.25   13.65
   4   3 -15    3.51    3.52
  -4   3  15   -3.17    4.68
  -4  -3  15    3.47    3.80
  -4  -3  15   -0.36    2.92
   4  -3 -15    2.99    1.36
   4  -3 -15    2.15    1.49
   4   3 -14  112.14    6.10
  -4  -3  14  117.83    8.18
  -4  -3  14   97.88    4.98
   4  -3 -14  105.88   12.69
   4  -3 -14   84.49    4.85
   4   3 -13   44.73   12.92
  -4   3  13   28.82    5.85
   4  -3 -13   47.24    3.78
   4  -3 -13   41.22   13.00
  -4  -3  13   29.34    9.22
  -4  -3  13   42.58   11.70
   4  -3 -13   25.43    4.32
   4   3 -12  258.41   12.21
  -4   3  12  180.80    9.49
   4  -3 -12  221.57    9.75
   4  -3 -12  239.18   10.82
  -4  -3  12  205.70   10.01
  -4  -3  12  239.16   12.16
   4  -3 -12  152.86    8.40
   4   3 -11   22.61    5.28
  -4   3  11   15.55    3.30
   4  -3 -11   14.88    3.54
   4  -3 -11   12.11    7.65
  -4  -3  11   17.30    6.26
  -4  -3  11   20.21    9.51
   4  -3 -11    9.55    3.77
   4   3 -10 2180.34   66.52
   4   3 -10 2340.04   71.42
  -4   3  10 1555.45   47.49
   4  -3 -10 1908.47   57.99
   4  -3 -10 2181.67   68.10
  -4  -3  10 2071.66   63.59
  -4  -3  10 2232.92   69.97
   4  -3 -10 1314.36   40.72
   4   3  -9   -5.78    5.75
   4   3  -9    0.77    2.46
   4  -3  -9    1.84    1.83
   4  -3  -9    0.51    1.79
  -4  -3   9   -4.16    5.03
  -4  -3   9    0.87    4.57
   4  -3  -9    4.96    4.94
   4  -3  -9   -3.93    3.73
   4   3  -8 4688.99  123.24
   4   3  -8 4800.70   37.83
  -4  -3   8 4729.47   20.77
   4  -3  -8 3590.02   94.16
   4  -3  -8 4556.97   20.74
  -4  -3   8 4378.87  115.43
   4  -3  -8 4985.28   17.43
   4  -3  -8 2621.31   69.52
   4   3  -7   -3.90    6.56
   4   3  -7    2.43    1.75
   4  -3  -7    1.30    2.05
   4  -3  -7    0.44    2.35
  -4  -3   7    4.06    3.28
  -4  -3   7    2.99    2.87
   4  -3  -7    2.17    2.85
   4  -3  -7    0.31    3.95
   4   3  -6 2192.88   53.63
   4   3  -6 2249.63   56.07
  -4  -3   6 2257.26   55.16
   4  -3  -6 1480.62   36.00
   4  -3  -6 2196.54   54.27
  -4  -3   6 2022.30   49.93
   4  -3  -6 2199.96   53.59
   4  -3  -6 1189.70   30.68
  -4   3   5    0.26    2.17
   4   3  -5    0.72    2.44
   4   3  -5   -2.16    9.21
   4  -3  -5    0.64    3.31
  -4  -3   5    2.20    4.73
  -4  -3   5    5.52    5.57
   4  -3  -5   -1.24    8.37
   4  -3  -5    1.42    5.34
   4   3  -4  557.69   30.82
  -4   3   4  515.46   23.26
  -4  -3   4  518.41   24.01
  -4  -3   4  326.19   15.67
   4  -3  -4  515.61   23.23
  -4  -3   4  498.22   23.91
   4  -3  -4  534.01   25.66
   4  -3  -4  288.15   15.37
   4   3  -3  128.02    9.46
  -4   3   3  118.25    6.83
  -4  -3   3  133.38    9.23
  -4  -3   3   84.09    7.29
   4  -3  -3  126.91    8.26
  -4  -3   3  116.12   20.74
   4  -3  -3  127.18    8.56
   4  -3  -3   66.47    7.62
   4   3  -2  327.22   17.55
  -4   3   2  296.12   14.20
  -4  -3   2  313.63   16.23
  -4  -3   2  216.25   11.95
   4  -3  -2  312.50   15.29
  -4  -3   2  293.35   15.27
   4  -3  -2  304.17   16.16
   4  -3  -2  159.03    9.95
  -4   3   1    3.29    3.94
   4   3  -1    6.10    7.86
   4   3  -1    1.35    6.12
  -4  -3   1    2.38    2.58
   4  -3  -1    2.00    4.10
  -4  -3   1    1.07    6.24
   4  -3  -1   -2.05    5.59
   4  -3  -1  -10.29    4.88
  -4   3   0   16.31    6.46
   4   3   0    7.56    9.25
   4   3   0    2.28    8.44
  -4  -3   0    8.47    7.94
   4  -3   0   10.05    7.06
  -4  -3   0    7.13    7.26
   4  -3   0    8.72    5.60
   4  -3   0    2.48    4.74
  -4   3  -1  131.98    8.78
   4   3   1  132.76   26.05
   4   3   1  102.40   12.55
  -4  -3  -1   92.35    8.33
   4  -3   1  137.99    8.71
  -4  -3  -1  150.54   20.70
   4  -3   1  143.60   22.48
   4  -3   1   69.32    6.64
  -4   3  -2   41.82   17.09
   4   3   2   63.30    9.36
   4   3   2   33.86    8.83
   4  -3   2   51.73    7.83
  -4  -3  -2   43.39   12.31
   4  -3   2   50.86   20.08
   4  -3   2   27.20    6.15
   4   3   3  810.42   31.53
   4   3   3  615.05   29.70
   4  -3   3  790.40   31.36
  -4  -3  -3  729.77   27.91
   4  -3   3  821.81   31.65
   4  -3   3  460.64   19.53
   4   3   4    3.76    5.71
   4   3   4   -0.31    9.25
   4  -3   4    7.36    7.19
  -4  -3  -4   10.19    5.19
   4  -3   4    7.17    5.33
   4  -3   4    3.95    4.67
   4   3   5  424.15   21.91
   4   3   5  330.46   18.50
   4  -3   5  414.30   19.29
  -4  -3  -5  388.43   15.90
   4  -3   5  428.70   18.99
   4  -3   5  255.68   11.87
   4   3   6   24.78   11.49
   4   3   6   24.83   11.68
   4  -3   6   18.25    8.33
  -4  -3  -6   25.05    6.67
   4  -3   6   31.28    9.35
   4  -3   6   13.17    3.16
   4   3   7  656.19   18.88
   4   3   7  514.50   26.31
   4  -3   7  657.92   24.23
  -4  -3  -7  608.25   18.10
   4  -3   7  646.68   18.89
   4  -3   7  430.17   14.37
   4   3   8  245.09   11.06
   4   3   8  236.78   17.33
   4  -3   8  265.45   16.67
  -4  -3  -8  240.63   10.88
   4  -3   8  270.36   12.35
   4   3   9  198.49   16.01
   4   3   9  176.28   18.07
   4  -3   9  219.12   13.62
  -4  -3  -9  177.85    9.08
   4  -3   9  212.77   12.63
   4  -3   9  138.38    6.59
   4   3  10  470.22   21.92
   4  -3  10  553.83   43.90
   4  -3  10  586.91   18.18
  -4  -3 -10  519.44   16.14
   4  -3  10  415.48   13.31
   4   3  11   63.74    7.42
   4   3  11   80.01   15.84
   4  -3  11   80.58   25.55
   4  -3  11   84.30    7.11
  -4  -3 -11   74.49    4.60
   4  -3  11   53.60    9.74
   4   3  12   80.67   16.52
   4   3  12   46.33    8.17
   4  -3  12   71.47   18.28
   4  -3  12   61.94   12.00
   4   3  13  144.04   15.38
   4  -3  13  123.06   16.66
   4  -3  13  119.04    4.53
   4   3  14   -0.10    9.69
   4  -3  14  -10.27   12.03
   4   3  15   38.53   14.04
   4  -3  15   49.69   15.51
   4   3  16    6.30    6.71
   4  -3  16   14.48   11.16
   4   3  17   13.00    6.32
   4  -3  17    8.09    9.36
   4   3  18    6.69   10.52
   4  -3  18    3.18    6.89
   4   3  19   -9.22    9.73
   4  -3  19    8.48    4.69
  -4  -4  23   31.41   12.05
  -4  -4  22    5.38    5.87
  -4  -4  21   43.75   19.20
  -4   4  20    2.90    3.31
  -4  -4  20    0.01    2.77
  -4   4  19    9.87    4.76
  -4  -4  19   22.26    8.49
  -4   4  18    4.05    4.96
  -4  -4  18   -0.84    6.01
  -4   4  17   -2.43    5.39
   4   4 -17    4.16    3.95
  -4  -4  17    5.41    4.24
   4  -4 -17    0.83    1.92
  -4   4  16    7.52    7.50
   4   4 -16    3.20    3.59
  -4  -4  16   15.88    5.90
   4  -4 -16    4.24    3.67
  -4   4  15    2.95    3.81
   4   4 -15    1.73    2.58
  -4  -4  15    0.93    3.37
   4  -4 -15   -2.94    3.19
  -4   4  14   36.34    6.89
   4   4 -14   28.51    8.85
  -4  -4  14   39.92   10.69
   4  -4 -14   34.40   10.90
  -4   4  13   34.19   14.74
   4   4 -13   45.75   16.82
  -4  -4  13   48.48   15.86
   4  -4 -13   39.95   14.85
  -4   4  12  220.55    9.41
   4   4 -12  303.13   11.14
   4  -4 -12  247.29   11.76
   4  -4 -12  297.81   10.21
  -4  -4  12  322.49   11.98
   4   4 -11    7.32    4.86
  -4  -4  11    6.75    8.09
   4  -4 -11    0.33    2.78
   4  -4 -11   -4.17    5.04
   4  -4 -11   -1.89    2.93
   4   4 -10 2677.10   70.21
  -4  -4  10 2674.55   73.20
   4  -4 -10 2912.67   76.17
   4  -4 -10 2638.23   69.00
   4  -4 -10 2021.74   52.78
   4   4  -9    1.24    2.85
  -4  -4   9    7.07    3.91
   4  -4  -9    1.08    4.17
   4  -4  -9    9.86    4.86
   4  -4  -9   -2.34    3.51
   4   4  -8 2002.55   61.89
   4  -4  -8 2165.09   66.08
   4  -4  -8 2007.62   62.68
   4  -4  -8 1440.24   44.29
   4   4  -7  178.33    8.87
  -4  -4   7  204.14   10.38
   4  -4  -7  206.22    8.72
   4  -4  -7  183.50    8.77
   4  -4  -7  130.23    7.17
   4   4  -6 2446.98   65.61
   4   4  -6 2423.76   65.35
  -4  -4   6 2474.20   66.47
   4  -4  -6 2516.31   67.51
   4  -4  -6 2365.06   63.95
   4  -4  -6 1615.65   43.42
  -4   4   5  153.89    5.99
   4   4  -5  167.27    6.68
   4   4  -5  157.95   19.83
  -4  -4   5  155.38    9.86
   4  -4  -5  159.24    9.10
   4  -4  -5  156.10    7.64
  -4   4   4  801.80   30.07
   4   4  -4  847.67   33.77
   4  -4  -4  793.33   30.30
  -4  -4   4  836.02   32.44
   4  -4  -4  854.13   33.60
  -4  -4   4  494.70   20.01
   4   4  -3  412.14   22.27
  -4   4   3  384.89   18.19
   4  -4  -3  415.25   21.30
  -4  -4   3  245.96   13.17
   4  -4  -3  408.80   21.26
  -4  -4   3  396.87   19.95
   4   4  -2  184.91   13.85
  -4   4   2  158.12    9.12
   4  -4  -2  172.92   10.29
  -4  -4   2  113.54    7.20
   4  -4  -2  178.28   13.70
  -4  -4   2  199.06   12.53
   4   4  -1   26.53   11.92
  -4   4   1   12.31    4.92
  -4  -4   1   14.40   11.84
   4  -4  -1   15.73    9.63
   4  -4  -1    6.47    4.84
  -4   4   0   -0.83    4.69
   4   4   0    6.60    8.76
   4   4   0    2.77    5.86
   4  -4   0    7.11    5.06
   4  -4   0    5.68    6.22
   4   4   1  189.77   12.50
   4   4   1  270.57   12.82
   4  -4   1  272.72   23.13
   4  -4   1  292.99   19.48
   4   4   2   -2.06    8.74
   4   4   2    2.81    4.81
   4  -4   2   -3.57    8.06
   4  -4   2   -2.13    6.58
   4   4   3  404.28   19.02
   4   4   3  509.01   21.10
   4  -4   3  552.69   27.91
   4  -4   3  553.88   22.81
   4   4   4   28.54    9.35
   4   4   4   37.17    8.94
   4  -4   4   72.90   21.19
   4  -4   4   65.43   23.39
   4   4   5   81.95    8.99
   4   4   5   88.81    5.73
   4  -4   5  109.14   11.40
   4  -4   5   99.70    6.52
   4   4   6   40.43    9.33
   4   4   6   35.12   13.25
   4  -4   6   40.27   14.71
   4  -4   6   30.68   14.79
   4   4   7   11.12    6.76
   4   4   7   12.67    8.00
   4  -4   7   12.52    9.02
   4  -4   7   18.16    9.64
   4   4   8    0.79   10.63
   4   4   8   -4.00    4.56
   4  -4   8    7.54    7.58
   4  -4   8   -2.72    3.76
   4   4   9  184.80   10.08
   4   4   9  175.17   16.75
   4  -4   9  207.87   11.45
  -4  -4  -9  176.47    6.86
   4  -4   9  203.83   15.28
   4   4  10  234.13    9.95
   4   4  10  200.93   12.24
   4  -4  10  254.51   17.35
  -4  -4 -10  221.89    5.86
   4  -4  10  255.33    8.36
   4   4  11  206.70   12.08
   4   4  11  213.23    7.49
   4  -4  11  257.73   34.44
   4  -4  11  255.02    7.22
   4   4  12   98.99   10.87
   4   4  12   91.98   10.93
   4  -4  12  145.12   37.24
   4  -4  12  127.48    6.90
   4   4  13   66.36   14.90
   4   4  13   42.53    8.04
   4  -4  13   66.14   11.61
   4  -4  13   72.80    6.14
   4   4  14    5.89   10.05
   4  -4  14    4.03    7.86
   4   4  15   13.68    9.70
   4  -4  15    7.10   11.74
   4   4  16   35.72   11.14
   4  -4  16   27.23   16.32
   4   4  17   -4.69   10.50
   4  -4  17  -11.54   10.66
   4   4  18   39.43   11.56
   4  -4  18   50.10   20.68
   4   4  19    7.70    9.35
   4  -4  19   -3.95   11.02
  -4  -5  22   -4.21    6.25
  -4  -5  21    8.70    8.84
  -4   5  20    6.44    7.38
  -4  -5  20    4.27    5.10
  -4   5  19    4.87    5.73
  -4  -5  19   -1.10    6.35
  -4   5  18    8.41    6.68
  -4  -5  18    8.39    6.88
  -4   5  17    4.38    4.78
   4   5 -17   -0.69    4.40
  -4  -5  17    4.84    6.43
   4  -5 -17    7.54    4.39
  -4   5  16    0.44    5.32
   4   5 -16    6.20    3.43
  -4  -5  16    2.13    4.17
   4  -5 -16    2.46    1.88
  -4   5  15    9.51    5.09
   4   5 -15   -0.33    1.95
  -4  -5  15   -2.43    6.05
   4  -5 -15    7.48    4.17
   4   5 -14   13.19    5.54
   4  -5 -14   31.51    8.85
   4  -5 -14   18.14    6.46
  -4  -5  14    8.88   11.22
   4   5 -13    6.54    5.63
   4  -5 -13    9.39    3.62
   4  -5 -13    0.51    5.21
  -4  -5  13    6.24    6.90
   4   5 -12  110.26   18.52
   4  -5 -12  147.39   14.08
   4  -5 -12  131.14    8.13
  -4  -5  12  130.52   10.02
   4   5 -11  612.96   23.26
   4  -5 -11  724.64   27.51
   4  -5 -11  660.31   23.39
  -4  -5  11  653.80   26.14
   4   5 -10  378.21   18.89
   4  -5 -10  391.39   14.80
   4  -5 -10  382.07   15.50
  -4  -5  10  408.48   26.93
   4   5  -9  530.29   26.48
  -4  -5   9  550.12   17.42
   4  -5  -9  629.02   18.87
   4  -5  -9  540.02   17.28
   4  -5  -9  383.78   12.44
   4   5  -8  813.33   24.54
  -4  -5   8  838.20   26.62
   4  -5  -8  868.28   26.44
   4  -5  -8  824.25   24.70
   4  -5  -8  556.72   16.23
   4   5  -7  183.36   14.34
  -4  -5   7  201.83    9.92
   4  -5  -7  208.78    7.15
   4  -5  -7  185.50    7.34
   4  -5  -7  124.12    5.68
   4   5  -6 1756.52   54.92
   4  -5  -6 1867.76   57.25
   4  -5  -6 1122.04   34.95
  -4  -5   6 1812.04   56.48
  -4   5   5  922.91   29.10
   4   5  -5  891.81   30.22
  -4   5   5  453.10   17.94
  -4  -5   5  907.76   33.01
   4  -5  -5  969.91   30.82
  -4   5   4  537.40   19.31
  -4   5   4 1002.96   10.32
   4   5  -4 1025.60   30.91
  -4  -5   4 1047.33   12.89
   4  -5  -4 1023.17   28.75
   4   5  -3 1195.91   35.18
  -4   5   3  588.81   18.51
  -4  -5   3 1241.70   34.90
   4  -5  -3 1203.67   33.68
   4   5  -2  352.32   19.20
  -4   5   2  198.84   12.30
  -4  -5   2  390.94   11.30
   4  -5  -2  372.24   18.16
   4   5  -1  431.99   20.51
  -4   5   1  255.08   14.89
  -4  -5   1  456.95   20.56
   4  -5  -1  452.06   19.27
   4   5   0   -5.29    8.15
  -4   5   0   -1.61    8.46
  -4  -5   0    2.30    5.78
   4  -5   0    7.46    4.11
  -4   5  -1   36.37   24.19
   4   5   1   89.94   23.87
   4  -5   1   90.65    9.04
   4   5   2  194.03   10.32
   4   5   2  143.82   13.08
  -4   5  -2  112.30    7.58
   4  -5   2  201.48   10.57
   4   5   3   78.11    7.59
   4   5   3   70.11    9.10
  -4   5  -3   34.27   11.66
   4  -5   3   92.85   31.98
   4   5   4   22.44   14.49
   4   5   4   14.61    9.40
  -4   5  -4   26.44    7.17
   4  -5   4   31.74   15.77
   4   5   5    7.52    4.19
   4   5   5    5.35    9.83
   4  -5   5   -1.53    8.75
   4   5   6    5.44   10.46
   4   5   6   11.71    7.13
   4  -5   6    8.74    4.98
   4  -5   6    7.34    4.76
   4   5   7   -3.17   11.27
   4   5   7    8.04    7.11
   4  -5   7    8.28    5.84
   4  -5   7   -0.61    5.11
   4   5   8   28.94   17.32
   4   5   8   11.65    5.88
   4  -5   8   11.19   10.04
   4  -5   8    8.66    6.45
   4   5   9  108.48   15.77
   4   5   9  126.94   14.94
   4  -5   9  134.99   12.45
   4  -5   9  134.22    8.60
   4   5  10   23.76   11.52
   4   5  10   36.75    6.26
   4  -5  10   33.10   17.15
   4  -5  10   33.01    9.69
   4   5  11  198.45   12.39
   4   5  11  192.89   16.53
   4  -5  11  261.69   24.45
   4  -5  11  270.33   12.62
   4   5  12   80.40   15.13
   4   5  12   65.45    6.33
   4  -5  12   96.15   23.15
   4  -5  12   76.82    9.99
   4   5  13   30.66   10.02
   4   5  13   27.71    4.70
   4  -5  13   56.66   13.78
   4  -5  13   24.63    8.11
   4   5  14   10.97    9.64
   4  -5  14   30.28   17.56
   4   5  15    1.83   10.37
   4  -5  15    2.33    7.18
   4   5  16   23.42   13.57
   4  -5  16   12.14   10.22
   4   5  17   -2.68    9.58
   4  -5  17   12.54   10.90
   4   5  18   51.22   12.49
   4  -5  18   62.34   17.49
  -4  -6  21    3.69    5.95
  -4  -6  20   32.70   11.41
  -4  -6  19    4.09    2.81
  -4  -6  18   45.13   11.34
   4   6 -17   11.63    7.01
  -4  -6  17   -0.56    6.31
   4  -6 -17    6.05    5.71
   4   6 -16    1.04    4.77
   4  -6 -16    1.29    2.79
   4  -6 -16    4.52    4.79
  -4  -6  16    4.84    6.55
   4   6 -15    5.79    5.36
   4  -6 -15    9.80    6.60
   4  -6 -15   10.47    5.98
  -4  -6  15    5.69    6.68
   4   6 -14   44.07   20.55
   4  -6 -14   68.89   22.95
   4  -6 -14   57.94   19.17
  -4  -6  14   60.36   17.58
   4   6 -13   36.77    7.52
   4  -6 -13   45.16   14.93
   4  -6 -13   40.45   15.38
  -4  -6  13   49.09   15.29
   4   6 -12   10.94    9.27
   4  -6 -12   16.35    8.85
   4  -6 -12    9.77    7.69
  -4  -6  12   15.03    9.13
   4   6 -11  527.32   20.38
   4  -6 -11  641.63   20.62
   4  -6 -11  569.66   29.93
  -4  -6  11  631.37   22.04
   4   6 -10    6.05    7.72
   4  -6 -10   14.66    4.45
   4  -6 -10   12.21    6.83
  -4  -6  10   21.80    9.66
   4   6  -9  774.26   32.87
   4  -6  -9  941.83   31.80
   4  -6  -9  867.37   39.11
  -4  -6   9  891.34   31.50
   4   6  -8  437.55   19.12
  -4   6   8  232.55   14.54
   4  -6  -8  494.60   18.17
  -4  -6   8  482.73   19.95
  -4   6   7  272.55   15.18
  -4  -6   7  520.54   18.57
   4  -6  -7  535.55   16.97
   4   6  -6  891.47   27.22
  -4   6   6  517.42   18.22
   4  -6  -6  931.10   26.26
  -4  -6   6  922.69   27.67
   4   6  -5  641.65   21.80
  -4   6   5  339.66   16.11
  -4  -6   5  665.08   31.37
   4  -6  -5  662.16   19.60
   4   6  -4  470.95   15.84
  -4   6   4  283.72   15.25
  -4  -6   4  531.29   17.96
   4  -6  -4  482.80   15.77
   4   6  -3 1250.89   40.72
  -4   6   3  672.27   24.88
  -4  -6   3 1340.81   54.49
   4  -6  -3 1263.26   39.97
   4   6  -2   87.72    9.37
  -4   6   2   41.40    8.93
  -4  -6   2  102.71   14.78
   4  -6  -2  103.89   20.19
   4   6  -1  826.80   43.74
  -4   6   1  461.24   18.46
  -4  -6   1  940.04   33.96
   4  -6  -1  872.20   29.05
   4   6   0   22.92    8.71
  -4   6   0    3.42    7.70
  -4  -6   0   12.57   10.16
   4  -6   0   18.28   11.55
   4   6   1  185.78   19.19
  -4   6  -1  124.02   11.73
  -4  -6  -1  222.79   13.02
   4  -6   1  203.68   12.99
   4   6   2   -1.86    7.23
  -4   6  -2    2.59    7.16
  -4  -6  -2   -8.20    9.11
   4  -6   2    7.56    7.97
   4   6   3    8.78    8.51
   4   6   3   24.89    8.44
  -4   6  -3   16.99    8.01
   4  -6   3   24.84   11.37
   4   6   4    4.47    6.50
   4   6   4    5.21    7.35
  -4   6  -4    0.36    8.05
   4  -6   4   22.71    8.75
   4   6   5   85.25    9.54
   4   6   5   78.37   17.23
  -4   6  -5   68.31   10.23
   4  -6   5  115.89   10.36
   4   6   6   39.85   18.16
   4   6   6   46.12   10.27
  -4   6  -6   35.50   12.12
   4  -6   6   48.36   26.60
   4   6   7  122.85    9.74
   4   6   7  110.78   15.04
   4  -6   7  139.96   14.96
   4   6   8   54.31   16.39
   4   6   8   36.70    8.10
   4  -6   8   41.31   24.01
   4  -6   8   42.46   11.41
   4   6   9   89.93   17.37
   4   6   9  101.28    8.22
   4  -6   9  108.85   40.54
   4  -6   9  110.08    6.91
   4   6  10   14.29   13.04
   4   6  10   27.74    7.70
   4  -6  10   25.39   13.70
   4  -6  10   15.85    8.12
   4   6  11   36.05   15.22
   4   6  11   21.41    7.14
   4  -6  11   30.94   13.48
   4  -6  11   21.79    9.39
   4   6  12    9.76   10.43
   4   6  12   13.01    6.35
   4  -6  12   13.02    6.55
   4  -6  12    7.41    4.59
   4   6  13   10.31    9.78
   4   6  13   12.43    4.92
   4  -6  13   13.56   10.59
   4  -6  13   15.37    5.33
   4   6  14   53.67   17.09
   4  -6  14   72.31   20.96
   4   6  15    9.43   12.30
   4  -6  15   20.85   13.34
   4   6  16   10.10    7.67
   4  -6  16    4.98    6.56
   4   6  17    5.80    6.46
   4  -6  17   11.79   10.80
   4   6  18   14.88    5.71
   4  -6  18   22.62   10.83
  -4  -7  21    7.46    3.12
  -4  -7  20   27.91    9.56
  -4  -7  19    9.33    7.50
   4  -7 -18   48.59   26.62
  -4  -7  18   53.11   12.92
   4   7 -17   -0.21    5.43
  -4  -7  17    3.49    5.20
   4  -7 -17    3.45    3.28
   4   7 -16   25.94    7.49
   4  -7 -16   13.71    5.85
   4  -7 -16   12.94    7.70
  -4  -7  16   18.31   13.77
   4   7 -15   17.85    5.98
   4  -7 -15   24.40   14.89
   4  -7 -15   16.51    8.69
  -4  -7  15   25.07    8.91
   4   7 -14   23.47    7.91
   4  -7 -14   29.92   13.43
   4  -7 -14   25.82   13.24
  -4  -7  14   34.26   12.89
   4   7 -13   47.89   23.06
   4  -7 -13   71.69    7.92
   4  -7 -13   72.40   27.57
  -4  -7  13   80.19   12.07
   4   7 -12   16.94    7.43
   4  -7 -12   19.89    5.91
   4  -7 -12   17.43   12.26
  -4  -7  12   23.55    4.26
   4   7 -11  222.98   14.85
   4  -7 -11  288.76   10.82
   4  -7 -11  239.35   12.43
  -4  -7  11  266.32   10.76
   4   7 -10   49.53   13.90
   4  -7 -10   24.21   13.00
   4  -7 -10   40.40   15.07
   4   7  -9  568.98   22.35
  -4   7   9  312.83   16.05
   4  -7  -9  683.35   22.36
  -4  -7   9  665.01   24.69
   4   7  -8  328.55   18.86
  -4   7   8  159.75   15.10
   4  -7  -8  362.13   14.79
  -4  -7   8  356.22   17.37
   4   7  -7  647.23   25.67
  -4   7   7  379.71   17.70
   4  -7  -7  755.31   24.58
  -4  -7   7  749.77   25.70
   4   7  -6  263.88   30.20
  -4   7   6  154.96   12.66
  -4  -7   6  282.96   11.42
   4  -7  -6  316.79   12.69
   4   7  -5  216.53   15.01
  -4   7   5  131.59   13.41
   4  -7  -5  279.93   12.13
  -4  -7   5  271.02   29.91
   4   7  -4    4.59    4.58
  -4   7   4    2.13   10.11
  -4  -7   4   18.68    7.81
   4  -7  -4   25.37    6.85
   4   7  -3  160.06   13.15
  -4   7   3  105.39   13.32
   4  -7  -3  178.87   11.95
  -4  -7   3  179.19   12.55
   4   7  -2   99.17   24.01
  -4   7   2   71.46   12.11
  -4  -7   2  164.49   16.14
   4  -7  -2  107.72    7.97
   4   7  -1  267.84   12.60
  -4   7   1  177.33   14.03
  -4  -7   1  306.95   13.39
   4  -7  -1  290.55   11.95
   4   7   0  119.65   10.39
  -4   7   0   59.06   13.33
  -4  -7   0  144.37   11.95
   4  -7   0  138.38    9.36
   4   7   1  319.32   16.76
  -4   7  -1  185.19   12.99
  -4  -7  -1  392.36   21.59
   4  -7   1  357.37   29.59
   4   7   2    4.95    5.28
  -4   7  -2   -0.29    8.28
  -4  -7  -2   17.40    7.82
   4  -7   2   18.84   11.72
   4   7   3  156.04   42.37
  -4   7  -3  102.99   12.17
  -4  -7  -3  179.19   10.60
   4  -7   3  156.41   13.28
   4   7   4    7.87    9.69
  -4   7  -4    7.74    9.65
  -4  -7  -4   -7.70    9.74
   4  -7   4    3.34    9.82
  -4   7  -5   93.23   12.02
   4   7   5  153.93   11.30
   4  -7   5  174.66   20.34
   4   7   6  122.76   10.55
   4   7   6   81.96   10.64
  -4   7  -6   78.79   14.18
   4  -7   6  118.35   42.38
   4   7   7  340.58   17.65
   4   7   7  317.14   20.57
  -4   7  -7  214.54   16.06
   4  -7   7  426.65   21.51
   4   7   8  125.36    9.07
   4   7   8  111.80   12.81
  -4   7  -8   84.33   13.08
   4  -7   8  162.49   40.43
   4   7   9  139.20   17.00
   4   7   9  161.82    8.70
   4  -7   9  219.40   20.65
   4  -7   9  208.26   20.48
   4   7  10   26.63   11.76
   4   7  10   30.92    7.61
   4  -7  10   20.19   15.72
   4  -7  10   15.96    7.31
   4   7  11    2.06   11.27
   4   7  11    1.10    4.95
   4  -7  11    2.80    8.63
   4  -7  11    4.23    4.31
   4   7  12   79.81   14.65
   4   7  12   37.47   19.38
   4  -7  12  118.21   14.58
   4  -7  12   80.59   20.58
   4   7  13   -4.07    9.71
   4  -7  13   24.99   10.99
   4  -7  13    9.64    5.56
   4   7  14   70.90   10.75
   4  -7  14   78.40   28.58
   4   7  15   -4.99    9.91
   4  -7  15    8.42   12.54
   4   7  16   -6.47    8.45
   4  -7  16   -0.35    9.38
   4   7  17   14.81    8.69
   4  -7  17   12.05    9.97
  -4  -8  19   22.75    8.37
  -4  -8  18   16.35    7.93
   4   8 -17    2.45    6.05
  -4  -8  17   15.61    6.74
   4  -8 -17   10.69    7.78
   4   8 -16   70.94   11.51
   4  -8 -16  112.60    7.62
   4  -8 -16   70.26   13.31
  -4  -8  16   72.39    9.33
   4   8 -15   17.48    9.47
   4  -8 -15   21.10   11.25
   4  -8 -15   17.27    7.93
  -4  -8  15   27.33    9.76
   4   8 -14  113.18   11.27
   4  -8 -14  141.91    7.68
   4  -8 -14  112.44    8.30
  -4  -8  14  136.98   17.89
   4   8 -13   30.60   11.75
   4  -8 -13   32.28   13.52
   4  -8 -13   35.27   12.94
  -4  -8  13   41.00   11.46
   4   8 -12   85.98   12.12
   4  -8 -12   99.48    8.53
   4  -8 -12   92.20   16.86
  -4  -8  12   75.07   24.45
   4   8 -11   37.81   13.51
   4  -8 -11   44.68   13.19
   4  -8 -11   31.13   24.78
  -4  -8  11   43.34    8.95
   4   8 -10   13.59    9.27
  -4   8  10   -2.10    8.28
   4  -8 -10   -1.09    7.17
  -4  -8  10   -8.28    8.92
   4   8  -9  150.40   18.23
  -4   8   9  104.37   13.05
   4  -8  -9  195.04   10.30
  -4  -8   9  231.33   15.85
   4   8  -8   32.08   10.81
  -4   8   8   32.05    9.27
   4  -8  -8   52.62   11.15
  -4  -8   8   58.57   17.08
   4   8  -7  615.31   30.32
  -4   8   7  378.48   20.72
  -4  -8   7  755.58   34.60
   4  -8  -7  721.59   32.99
   4   8  -6   -2.03    9.37
  -4   8   6   14.08    9.13
  -4  -8   6   13.72    8.16
   4  -8  -6    5.02    6.80
   4   8  -5  413.31   22.91
  -4   8   5  253.03   14.63
   4  -8  -5  501.97   19.61
  -4  -8   5  470.16   17.73
   4   8  -4    6.22    7.94
  -4   8   4    7.21   10.77
  -4  -8   4   12.43    9.95
   4  -8  -4   20.73   11.39
   4   8  -3   40.62   19.59
  -4   8   3   48.62   10.58
  -4  -8   3   50.55   14.70
   4  -8  -3   60.97    9.12
   4   8  -2  251.03   15.58
  -4   8   2  165.36   13.36
  -4  -8   2  319.61   18.23
   4  -8  -2  268.01   16.98
   4   8  -1   84.88   10.62
  -4   8   1   62.91   13.30
  -4  -8   1   90.17   13.49
   4  -8  -1   88.17   13.53
   4   8   0   66.20   10.95
  -4   8   0   31.84   10.26
  -4  -8   0  106.25    9.31
   4  -8   0   92.84   36.62
   4   8   1   73.34   25.51
  -4   8  -1   50.36    9.46
  -4  -8  -1  101.06    9.21
   4  -8   1   71.89   30.25
   4   8   2   13.22    8.39
  -4   8  -2    6.74    9.37
  -4  -8  -2    9.54    7.18
   4  -8   2    6.32    9.68
   4   8   3   -0.93    8.85
  -4   8  -3    8.30   11.11
  -4  -8  -3   -1.79    9.13
   4  -8   3   16.88   13.71
   4   8   4  111.04   26.33
  -4   8  -4   62.90   14.49
  -4  -8  -4  129.21   10.57
   4  -8   4  132.36   13.98
   4   8   5  173.79   12.11
  -4   8  -5  105.77   14.45
  -4  -8  -5  215.51   30.55
   4  -8   5  180.81   11.10
   4   8   6  157.62   13.42
  -4   8  -6   87.90   10.27
  -4  -8  -6  208.09   28.74
   4  -8   6  229.33   16.47
   4   8   7  208.24   11.21
  -4   8  -7  126.59   14.12
  -4  -8  -7  286.68   16.42
   4  -8   7  223.03   12.69
   4   8   8   63.82    8.53
   4   8   8   47.79   12.16
  -4   8  -8   42.33   21.64
   4  -8   8   80.09   22.29
   4   8   9   73.78    9.20
   4   8   9   60.57   20.56
  -4   8  -9   48.10   11.61
   4  -8   9  106.42   36.82
   4   8  10   56.38   11.08
   4   8  10   35.45    7.69
   4  -8  10   73.77   26.79
   4  -8  10   47.84   19.54
   4   8  11   12.17   10.23
   4   8  11   13.86    5.01
   4  -8  11   48.33   16.39
   4  -8  11   37.45    9.77
   4   8  12   51.91   21.60
   4   8  12   58.42    8.81
   4  -8  12   84.16   32.53
   4  -8  12   77.70   29.69
   4   8  13   37.44   14.35
   4  -8  13   24.45   13.67
   4  -8  13   10.92    5.71
   4   8  14   12.87    7.88
   4  -8  14   12.55   12.46
   4   8  15    9.37    9.11
   4  -8  15   -8.99   10.53
  -4  -9  18   10.43    9.76
   4   9 -17    2.59    4.75
  -4  -9  17    9.07    7.02
   4   9 -16   56.45    9.66
   4  -9 -16   51.11   21.52
   4  -9 -16   70.12   15.59
  -4  -9  16   59.20   19.89
   4   9 -15    9.95    6.05
   4  -9 -15    1.93    3.79
   4  -9 -15    7.75    6.76
  -4  -9  15   -3.05    9.15
   4   9 -14  104.74   13.49
   4  -9 -14  121.50    8.42
   4  -9 -14   94.12   21.94
  -4  -9  14   94.89   10.10
   4   9 -13   18.15    7.38
   4  -9 -13   15.26   12.72
   4  -9 -13   27.56   11.93
  -4  -9  13   17.19   11.34
   4   9 -12    0.86    8.78
   4  -9 -12   15.39    6.00
   4  -9 -12   14.17   10.31
  -4  -9  12   24.77    9.49
   4   9 -11   -2.76   10.90
  -4  -9  11   -4.62    9.64
   4  -9 -11   12.00   10.39
   4   9 -10    3.52    9.73
  -4   9  10    0.68    4.57
   4  -9 -10   -0.05    4.93
  -4  -9  10    6.64    6.79
   4   9  -9   21.28   14.74
  -4   9   9   -3.12    9.58
   4  -9  -9   14.93   10.89
  -4  -9   9   -2.38    8.50
   4   9  -8  -10.53   11.69
  -4   9   8    3.23    9.24
  -4  -9   8   15.34   10.67
   4  -9  -8    2.15    7.23
   4   9  -7  219.34   15.63
  -4   9   7  138.31   12.73
  -4  -9   7  256.19   14.42
   4  -9  -7  242.88   10.55
   4   9  -6    6.53    6.84
  -4   9   6   19.64    9.89
  -4  -9   6    7.15    9.70
   4  -9  -6   20.14   13.32
   4   9  -5  397.82   19.55
  -4   9   5  247.90   17.91
  -4  -9   5  471.71   30.59
   4  -9  -5  494.12   19.32
   4   9  -4   19.70   11.16
  -4   9   4   -1.02   10.37
  -4  -9   4   21.87   17.98
   4  -9  -4   21.69    9.50
   4   9  -3  116.56   14.40
  -4   9   3   98.76   14.11
   4  -9  -3  165.33   13.34
  -4  -9   3  165.64   17.90
   4   9  -2   36.63    9.96
  -4   9   2   24.40   10.06
  -4  -9   2   64.42   14.24
   4  -9  -2   55.47   13.98
   4   9  -1    2.57    8.29
  -4   9   1   -2.17   10.86
  -4  -9   1   -3.51    9.27
   4  -9  -1    3.25    9.66
   4   9   0   37.56   10.91
  -4   9   0   32.73   15.38
  -4  -9   0   41.32   18.27
   4  -9   0   58.34   19.29
   4   9   1    1.66   11.06
  -4   9  -1   17.69   10.01
  -4  -9  -1   17.86    9.07
   4  -9   1   15.69   11.33
   4   9   2   17.33    9.50
  -4   9  -2   12.61   10.15
  -4  -9  -2   19.09    9.50
   4  -9   2    9.18    8.92
   4   9   3   91.48   12.70
  -4   9  -3   71.78   16.58
  -4  -9  -3  143.73   13.76
   4  -9   3  139.90   13.01
  -4   9  -4    1.70   10.50
   4  -9   4    9.67   10.34
  -4  -9  -4   22.43   16.00
   4   9   5  183.01   17.67
  -4   9  -5  106.23   11.14
  -4  -9  -5  241.15   21.99
   4  -9   5  211.13   41.59
   4   9   6   29.57    8.90
  -4   9  -6   15.53   10.45
  -4  -9  -6   43.01   20.11
   4  -9   6   37.55   13.39
   4   9   7  110.26   12.43
  -4   9  -7   78.06   15.00
  -4  -9  -7  154.80   11.69
   4  -9   7  113.16   39.56
   4   9   8   60.81    9.29
  -4   9  -8   17.00    8.13
  -4  -9  -8   87.85   27.92
   4  -9   8   82.96   28.53
   4   9   9   76.39   10.19
  -4   9  -9   42.38   19.85
  -4  -9  -9   82.14   28.70
   4  -9   9   63.54   29.11
   4   9  10   54.66   10.17
   4  -9  10   82.98   20.32
  -4  -9 -10   91.63   31.43
   4   9  11   72.36    9.31
   4  -9  11   80.40   25.72
  -4  -9 -11   78.70   36.94
   4   9  12   21.40    8.17
   4  -9  12   27.63    9.42
   4  -9  12   33.12   19.71
   4   9  13   47.81   15.79
   4  -9  13   63.21   20.60
   4   9  14    4.93    9.58
   4  -9  14    4.33   11.65
   4  10 -16    8.67    6.44
   4 -10 -16    5.91    4.77
  -4 -10  16   19.01    6.98
   4  10 -15    3.70    7.73
   4 -10 -15    0.45    5.51
   4 -10 -15   -4.53    5.44
  -4 -10  15   -1.42    9.30
   4  10 -14   17.40    8.00
   4 -10 -14   13.82    6.15
   4 -10 -14    5.29    4.85
  -4 -10  14   16.61    8.85
   4  10 -13   18.89   10.84
   4 -10 -13    7.87    8.54
   4 -10 -13    2.71    4.27
  -4 -10  13   20.84   12.46
   4  10 -12   16.79   11.44
   4 -10 -12    1.64    6.14
   4 -10 -12   10.41    5.37
  -4 -10  12   -3.01    9.76
   4  10 -11    2.97    5.19
  -4  10  11    4.48    8.95
   4 -10 -11   -5.69    6.72
  -4 -10  11    2.56    9.63
   4  10 -10   -5.66    9.06
  -4  10  10   -4.49    9.31
   4 -10 -10    2.62    7.50
  -4 -10  10    5.17    4.49
   4  10  -9    2.22    9.52
  -4  10   9   14.67   10.62
   4 -10  -9    6.39    4.38
  -4 -10   9    5.09    8.69
   4  10  -8    6.73   11.84
  -4  10   8    4.83    9.67
  -4 -10   8   -3.14    9.11
   4 -10  -8   12.86    7.99
   4  10  -7    2.79   12.03
  -4  10   7    1.11    9.61
  -4 -10   7    6.38    9.62
   4 -10  -7   -0.31    8.22
   4  10  -6   19.04   10.58
  -4  10   6    0.20   11.15
  -4 -10   6   -4.55   10.48
   4 -10  -6    0.97    5.21
   4  10  -5   31.25   15.25
  -4  10   5   37.88   11.92
   4 -10  -5   72.14   11.62
  -4 -10   5   59.29   16.25
   4  10  -4   -3.87   11.40
  -4  10   4    5.58   10.45
   4 -10  -4    8.05    9.84
  -4 -10   4    9.20   10.40
   4  10  -3   38.12   11.57
  -4  10   3   13.75   10.02
   4 -10  -3   50.81   23.07
  -4 -10   3   29.77   19.07
   4  10  -2   16.38   10.11
  -4  10   2   16.08   10.41
  -4 -10   2    5.92    9.11
   4 -10  -2    6.03    6.23
   4  10  -1   11.29   10.16
  -4  10   1   17.98   15.98
  -4 -10   1   20.52   13.56
   4 -10  -1    2.05    8.45
   4  10   0   -2.37   11.40
  -4  10   0    9.90   11.30
  -4 -10   0   -6.92    9.79
   4 -10   0    4.63   12.00
   4  10   1   62.27   16.58
  -4  10  -1    2.52   10.21
  -4 -10  -1   58.07   10.50
   4 -10   1   52.85   13.02
   4  10   2   72.70   16.03
  -4  10  -2   44.65   10.90
  -4 -10  -2   83.72   33.36
   4 -10   2   75.79   37.11
   4  10   3  102.30   18.18
  -4  10  -3   98.94   18.92
  -4 -10  -3  159.88   14.01
   4 -10   3  119.73   43.20
   4  10   4    6.09    8.46
  -4  10  -4    5.37   11.15
  -4 -10  -4    6.98    7.87
   4 -10   4   17.75   10.62
  -4  10  -5   92.58   14.75
   4  10   5  147.50   14.60
   4 -10   5  156.61   38.74
   4  10   6   18.26    9.46
  -4  10  -6   -4.91    9.15
  -4 -10  -6   16.13   13.83
   4 -10   6    9.66   10.11
   4  10   7  137.02   16.19
  -4  10  -7  106.14   14.27
  -4 -10  -7  209.97   15.30
   4 -10   7  191.56   11.80
   4  10   8   -3.40    7.35
  -4  10  -8   -1.91    7.29
  -4 -10  -8    5.55   11.60
   4 -10   8   -1.05    4.58
   4  10   9   83.01   22.97
  -4  10  -9   58.73   30.48
  -4 -10  -9  150.79   50.15
   4 -10   9  129.83   37.78
   4  10  10   16.80    7.74
  -4  10 -10    5.56    7.96
  -4 -10 -10   20.99    9.37
   4 -10  10   41.92   16.95
   4  10  11   48.86    9.92
  -4 -10 -11   67.84   32.59
   4 -10  11   63.73   19.56
   4 -10  11  102.97   12.69
   4  10  12    1.86    5.37
  -4 -10 -12   16.16    9.99
   4 -10  12    7.76    8.56
   4 -10  12   33.17   12.13
   4  11 -14    1.38    4.41
   4 -11 -14   -0.45    5.15
   4 -11 -14    6.33    5.86
  -4 -11  14   12.17   11.61
   4  11 -13    9.16    8.23
   4 -11 -13    2.77    4.03
   4 -11 -13    3.27    3.54
  -4 -11  13   16.36   11.38
   4  11 -12   13.61    9.25
   4 -11 -12    0.73    4.93
   4 -11 -12    3.04    3.04
  -4 -11  12   10.81   13.01
   4  11 -11   18.63   13.57
  -4  11  11    4.15   10.22
   4 -11 -11    6.10    6.12
  -4 -11  11    4.05    7.52
   4  11 -10    2.67    8.81
  -4  11  10    4.97    3.95
   4 -11 -10   -4.02    7.44
  -4 -11  10   14.07    8.57
   4  11  -9   30.67    9.58
  -4  11   9   19.54   10.31
   4 -11  -9   18.44    7.18
  -4 -11   9    9.40    9.56
   4  11  -8    1.74   10.75
  -4  11   8   10.89   10.22
   4 -11  -8   -5.89    7.00
  -4 -11   8   -5.89   10.02
   4  11  -7   -4.31   11.10
  -4  11   7   11.48    9.97
  -4 -11   7    5.60   10.86
   4 -11  -7    3.81    6.39
   4  11  -6    1.89    4.44
  -4  11   6    9.95   10.79
  -4 -11   6    6.40    4.57
   4 -11  -6   -9.25    7.26
   4  11  -5   12.05   13.17
  -4  11   5   24.89   15.27
   4 -11  -5    2.49    8.41
  -4 -11   5   13.28    8.78
   4  11  -4   15.13   10.41
  -4  11   4   -0.38   10.63
   4 -11  -4   26.79    9.07
  -4 -11   4   14.84   10.48
   4  11  -3    7.17   11.52
  -4  11   3   15.09   10.97
   4 -11  -3   15.53    9.28
  -4 -11   3   18.77   15.16
   4  11  -2    7.48    9.83
  -4  11   2   -2.61   11.70
  -4 -11   2   19.76   10.51
   4 -11  -2   12.42   11.57
   4  11  -1    9.30    7.46
  -4  11   1   -4.67   11.28
  -4 -11   1    8.94   10.73
   4 -11  -1    4.51    8.90
   4  11   0    4.29    7.81
   4 -11   0   37.54   15.10
  -4 -11   0    7.82   11.13
   4  11   1   28.49   16.74
  -4  11  -1    0.09   10.59
  -4 -11  -1   22.95   12.29
   4 -11   1   16.58    9.05
   4  11   2   68.44   14.49
  -4  11  -2   38.92   11.22
  -4 -11  -2   48.69   11.34
   4 -11   2   74.15   22.04
   4  11   3  108.60   13.79
  -4  11  -3   61.00   16.69
  -4 -11  -3   99.45   40.85
   4 -11   3  119.17   38.49
   4  11   4   -0.72    9.82
  -4  11  -4   -2.02   10.69
  -4 -11  -4    6.14    9.34
   4 -11   4    1.75   10.31
   4  11   5   97.39   16.09
  -4  11  -5   82.75   10.19
  -4 -11  -5  119.14   10.75
   4 -11   5  112.04   14.80
   4  11   6   46.70   13.97
  -4  11  -6   16.10    8.76
  -4 -11  -6   93.75   11.56
   4 -11   6   72.09   12.94
   4  11   7   92.41   27.97
  -4  11  -7   87.01   13.97
  -4 -11  -7  173.50   24.13
   4 -11   7  157.96   11.01
   4  11   8   17.71    9.38
  -4  11  -8    7.40    7.88
  -4 -11  -8   11.33    8.01
   4 -11   8   28.89   14.69
   4  11   9   74.32   12.15
  -4  11  -9   47.06   21.76
  -4 -11  -9  122.18   34.98
   4 -11   9  137.34   30.44
   4  11  10    1.21    6.72
  -4  11 -10    1.35    6.71
  -4 -11 -10    5.49    7.63
   4 -11  10   -0.34   10.86
   4  12 -11   12.40   10.58
  -4 -12  11   15.80    9.37
   4 -12 -11   28.72    6.99
   4  12 -10   11.67    9.47
  -4  12  10    0.12    8.79
   4 -12 -10    1.21    3.96
  -4 -12  10   13.06   11.17
  -4  12   9   51.36   12.23
   4  12  -9   62.21   13.43
  -4 -12   9   59.15   13.43
   4  12  -8    4.97   10.43
  -4  12   8    7.12   10.76
   4 -12  -8    2.53    5.12
  -4 -12   8    0.39    9.36
   4  12  -7    9.20   11.10
  -4  12   7   14.81   10.56
  -4 -12   7   20.93   10.44
   4 -12  -7   17.69    7.47
   4  12  -6   19.21   14.28
  -4  12   6    9.51   10.26
  -4 -12   6    2.67    9.40
   4 -12  -6    5.84    7.07
   4  12  -5   -0.99    9.10
  -4  12   5   -4.64   10.29
   4 -12  -5   11.96   10.87
  -4 -12   5   -1.31   10.86
   4  12  -4   -3.80    9.93
  -4  12   4    4.95   11.63
   4 -12  -4    2.54    6.60
  -4 -12   4   -1.21   10.92
   4  12  -3   39.90   15.62
  -4  12   3    1.35   11.76
  -4 -12   3   12.67   12.34
   4 -12  -3   31.32   12.46
   4  12  -2    4.84   10.97
  -4  12   2   10.19   15.48
  -4 -12   2    8.25   11.04
   4 -12  -2    0.72    8.31
   4  12  -1   11.71   11.98
  -4  12   1   12.63    9.97
  -4 -12   1    9.63    7.66
   4 -12  -1   10.25    8.09
   4  12   0    7.00   11.31
  -4  12   0    8.90    8.73
  -4 -12   0   -8.62   10.89
   4 -12   0   -2.14    8.78
   4  12   1    6.25   10.35
  -4  12  -1   -6.44    8.93
  -4 -12  -1    3.65    6.85
   4 -12   1   11.76    9.40
   4  12   2    8.51   10.77
  -4  12  -2   12.48    9.40
  -4 -12  -2    9.11    9.89
   4 -12   2    7.19   10.00
   4  12   3    8.92   10.65
  -4  12  -3   11.36   10.09
  -4 -12  -3   37.59    9.85
   4 -12   3   37.09   18.87
   4  12   4   -3.25    9.30
  -4  12  -4   -4.08    9.25
  -4 -12  -4   21.31   14.38
   4 -12   4   11.92   10.54
   4  12   5   20.98   12.26
  -4  12  -5   23.18   12.49
  -4 -12  -5   15.62   12.46
   4 -12   5   33.43   10.06
   4  12   6   27.42   13.56
  -4  12  -6    5.62    9.01
  -4 -12  -6   21.13   16.10
   4 -12   6   49.40   15.43
   4  12   7   32.30    8.57
  -4  12  -7   40.07    9.07
  -4 -12  -7   44.17   25.46
   4 -12   7   48.94   24.36
   4  13  -6   14.10   14.27
  -4  13   6   24.86   10.42
  -4 -13   6    2.83    9.27
   4 -13  -6   24.87    8.16
  -4  13   5   18.68   14.41
   4  13  -5    5.02    6.53
  -4 -13   5   27.60   10.19
   4  13  -4    8.14   11.32
  -4  13   4   -6.19   11.20
  -4 -13   4    3.17    6.03
   4 -13  -4    4.92    9.18
   4  13  -3    0.01   11.35
  -4  13   3   -4.16   12.05
  -4 -13   3   10.00    8.67
   4 -13  -3   20.65    9.27
   4  13  -2    0.74   11.66
  -4  13   2  -12.47   11.56
  -4 -13   2    4.44    4.83
   4 -13  -2    3.51    4.58
   4  13  -1   14.87   11.91
  -4  13   1    1.57   10.55
  -4 -13   1   -4.33   10.80
   4 -13  -1    9.31    8.97
   4  13   0    3.78   10.44
  -4  13   0    5.02   10.33
  -4 -13   0    3.04   10.77
   4 -13   0   -0.59    8.97
   4  13   1    5.36    5.70
  -4  13  -1    4.78   10.46
  -4 -13  -1    6.13    9.94
   4 -13   1    7.67    9.81
   4  13   2   24.37   13.86
  -4  13  -2   17.70   15.28
  -4 -13  -2   38.79   16.01
   4 -13   2   58.07   16.90
  -5   0  21    6.08    5.60
  -5   0  20    8.53    5.61
  -5   0  19   -0.03    3.22
  -5   0  18  496.94   17.23
  -5   0  17    1.36    4.17
   5   0 -17   -0.92    3.13
  -5   0  16  175.16    6.61
   5   0 -16  195.03    6.13
   5   0 -15   -2.81    2.16
  -5   0  15    2.58    2.95
  -5   0  15    1.74    2.22
   5   0 -15   -2.10    3.99
   5   0 -14    2.86    1.74
  -5   0  14    0.10    2.89
  -5   0  14    4.77    2.59
   5   0 -14    2.94    3.67
   5   0 -13   -1.17    1.85
  -5   0  13   -0.84    3.13
  -5   0  13   -2.20    2.80
   5   0 -13   -0.45    4.51
   5   0 -12   67.40    4.29
  -5   0  12   72.66    9.48
  -5   0  12   60.94   13.03
   5   0 -12   66.31    6.99
   5   0 -11    1.47    1.27
  -5   0  11    2.15    1.42
  -5   0  11   -0.14    3.14
   5   0 -11   -3.49    5.23
   5   0 -10  102.27    4.18
  -5   0  10   97.07    4.36
  -5   0  10   92.97    5.48
   5   0 -10   95.72    8.15
   5   0  -9    0.82    0.95
  -5   0   9   -1.11    1.56
  -5   0   9    0.13    3.75
   5   0  -9    4.87    7.49
   5   0  -8 1095.79   26.34
  -5   0   8  952.57   23.12
  -5   0   8  965.26   25.30
   5   0  -8 1042.54   32.31
  -5   0   7   -0.81    4.66
   5   0  -7    5.16    6.37
  -5   0   6   25.62    4.09
  -5   0   6   15.42    7.55
   5   0  -6   31.40   19.24
  -5   0   5   -0.88    1.07
  -5   0   5    0.93    0.83
  -5   0   5   -6.65    4.49
   5   0  -5    3.34    3.31
  -5   0   4  972.29   16.52
   5   0  -4  775.69   13.64
  -5   0   4  965.68   31.82
   5   0  -4 1012.96   18.97
  -5   0   3   -0.91    3.19
   5   0  -3   -0.86    3.80
  -5   0   3    0.94    3.09
   5   0  -3  -15.60    7.27
  -5   0   2  528.69   17.55
   5   0  -2  490.09   16.78
  -5   0   2  568.59   19.51
   5   0  -2  588.28   21.71
  -5   0   1   -4.48    4.24
   5   0  -1   -7.69    4.89
  -5   0   1    0.35    3.98
   5   0  -1   -4.18    7.99
  -5   0   0 2649.26   44.29
   5   0   0 2517.32   42.91
  -5   0   0 2672.23   45.10
   5   0   0 2901.26   51.43
   5   0   1   -8.69    7.82
  -5   0  -1   -0.15    3.28
  -5   0  -1   -0.78    4.68
   5   0   1    4.59    4.85
   5   0   2 7573.46  181.32
  -5   0  -2 7713.65   22.63
  -5   0  -2 7935.06   21.77
   5   0   2 8056.52   33.50
   5   0   3   -3.54    9.86
  -5   0  -3    1.63    3.27
   5   0   3    0.67    3.41
   5   0   4 2846.58   76.47
  -5   0  -4 3068.84   80.96
   5   0   4 2986.86   80.02
   5   0   5   -4.30    8.77
  -5   0  -5   -3.98    3.77
   5   0   5   -0.09    5.95
   5   0   6  489.00   18.70
  -5   0  -6  479.45   17.59
   5   0   6  499.03   18.26
   5   0   7    5.33    9.81
  -5   0  -7    0.98    1.65
   5   0   7    7.59    5.28
   5   0   8    5.50    6.73
  -5   0  -8    2.04    0.65
   5   0   8    1.15    4.21
   5   0   9   -5.02   10.23
  -5   0  -9   -1.29    1.94
   5   0   9    1.42    3.79
   5   0  10  276.79   13.99
   5   0  10  325.20    6.23
   5   0  10  147.80    5.86
   5   0  11  -11.32   11.52
   5   0  11   -1.39    2.18
   5   0  11    0.39    1.57
   5   0  12   97.72   14.94
   5   0  12   96.52    5.75
   5   0  13  -16.36   11.92
   5   0  14    0.07   13.36
   5   0  15    1.94   12.65
   5   0  16   38.49   18.97
   5   0  17    2.75    4.57
   5   0  18   41.50   16.75
   5   0  19    0.38   11.68
  -5  -1  21   25.54    7.17
  -5   1  20   -4.87    4.14
  -5  -1  20    3.00    3.58
  -5   1  19    0.15    4.40
  -5  -1  19    1.17    4.69
  -5   1  18   91.75    6.96
  -5  -1  18  116.39   21.07
  -5   1  17    1.61    2.21
   5   1 -17    1.90    3.05
  -5  -1  17    4.12    3.95
   5  -1 -17    3.52    3.07
   5   1 -16  242.78    6.64
  -5   1  16  189.71    6.93
  -5  -1  16  238.65   12.38
   5  -1 -16  223.76    7.02
  -5  -1  16  208.12    4.59
   5   1 -15  182.26    7.85
   5   1 -15  188.56    7.25
  -5   1  15  160.25    7.32
  -5  -1  15  179.11    9.74
  -5  -1  15  167.61    6.41
   5  -1 -15  177.33   11.29
   5  -1 -15  168.53   10.43
   5  -1 -15   85.50    4.52
   5   1 -14   76.54    7.44
  -5   1  14   63.07    5.93
   5   1 -14   76.56   10.83
  -5   1  14   61.75    7.04
   5  -1 -14   63.38    3.36
  -5  -1  14   55.42    6.83
   5  -1 -14   70.74   22.15
  -5  -1  14   66.87    5.89
   5   1 -13  163.40    8.86
  -5   1  13  148.13    8.25
   5   1 -13  170.68    9.14
  -5   1  13  170.25    8.31
   5  -1 -13  162.21    7.35
  -5  -1  13  145.44    7.39
   5  -1 -13  170.25    9.44
  -5  -1  13  171.91    9.46
   5   1 -12   22.67    6.85
  -5   1  12   26.10    7.69
   5   1 -12   34.01   11.38
  -5   1  12   28.86    9.66
   5  -1 -12   28.70    7.47
  -5  -1  12   27.25    8.77
   5  -1 -12   32.01   14.53
  -5  -1  12   32.27    9.61
   5   1 -11   35.24    2.83
  -5   1  11   24.14    2.98
   5   1 -11   34.00   12.80
  -5   1  11   36.06   14.15
   5  -1 -11   35.88    4.98
  -5  -1  11   34.22    9.03
   5  -1 -11   18.78    9.00
  -5  -1  11   41.55    3.84
   5   1 -10  107.80    5.85
  -5   1  10   85.46    4.16
   5   1 -10  117.15    8.53
  -5   1  10  101.14    7.10
   5  -1 -10  108.28    3.67
   5  -1 -10  117.72    7.89
  -5  -1  10  108.30    6.63
  -5  -1  10  117.95    8.32
   5   1  -9   46.07    5.46
  -5   1   9   26.98    3.32
   5   1  -9   32.92    7.30
  -5   1   9   42.15    3.61
   5  -1  -9   43.66    3.83
   5  -1  -9   45.41   18.30
  -5  -1   9   43.61    4.60
  -5  -1   9   46.72    4.88
   5   1  -8   25.15    6.92
   5   1  -8   13.89    7.49
  -5   1   8   20.51    6.19
  -5  -1   8   20.81    3.20
   5  -1  -8   24.26    7.00
  -5  -1   8   21.30    5.18
   5   1  -7  586.13   18.98
  -5   1   7  552.04    9.47
  -5  -1   7  389.46   10.40
  -5  -1   7  570.23    9.31
   5  -1  -7  582.33   19.14
  -5  -1   7  589.75    8.52
   5   1  -6  481.88   24.91
  -5   1   6  475.66   21.61
  -5  -1   6  361.03   17.09
   5  -1  -6  494.92   24.69
  -5  -1   6  460.84   21.58
  -5  -1   6  510.64   24.01
  -5   1   5  426.85   19.82
  -5   1   5  473.86   20.97
   5   1  -5  450.74   24.48
  -5  -1   5  331.96   14.97
  -5  -1   5  477.37   23.03
   5  -1  -5  458.59   22.90
   5  -1  -5  393.92   17.61
  -5  -1   5  428.15   20.70
  -5   1   4  322.54   10.72
   5   1  -4  316.65   15.82
  -5   1   4  318.61   11.53
   5   1  -4  213.60    8.25
  -5  -1   4  267.46   10.57
   5  -1  -4  334.24   14.12
   5  -1  -4  303.07   10.34
  -5  -1   4  305.47   11.30
  -5   1   3  120.49    5.48
   5   1  -3  128.06    9.46
  -5   1   3  119.34    5.96
   5   1  -3   96.70    6.25
  -5  -1   3  107.81    5.88
   5  -1  -3  144.82   10.28
   5  -1  -3  124.48   13.07
  -5   1   2 2635.64   43.70
  -5   1   2 2596.63   43.80
   5   1  -2 2833.54   48.54
  -5  -1   2 2337.13   39.11
   5  -1  -2 2670.95   48.57
   5  -1  -2 2578.12   43.74
  -5   1   1    4.80    2.93
   5   1  -1   -2.88    8.88
  -5   1   1    1.41    3.28
   5   1  -1   -3.82    5.92
  -5  -1   1   -0.40    4.36
   5  -1  -1   -1.37    7.46
   5  -1  -1    0.43    4.63
  -5  -1   1   -0.76    5.46
  -5   1   0 1797.71   46.76
   5   1   0 1577.98   39.60
   5   1   0 1937.37   58.07
  -5   1   0 1834.23   44.93
  -5  -1   0 1689.50   43.90
  -5  -1   0 1800.89   44.34
   5  -1   0 1916.91   48.18
   5  -1   0 1823.59   44.78
  -5   1  -1   15.72   10.67
   5   1   1    8.40    8.84
   5   1   1   20.50   10.30
  -5   1  -1   23.70    4.50
  -5  -1  -1   24.85    6.53
  -5  -1  -1   14.59    7.33
   5  -1   1   16.25    7.77
   5  -1   1   11.22    6.90
  -5   1  -2 2912.86   70.52
   5   1   2 2780.85   68.86
   5   1   2 3136.26   76.24
  -5   1  -2 3024.06   73.34
  -5  -1  -2 2827.40   68.71
  -5  -1  -2 3042.65   73.45
   5  -1   2 3074.69   75.92
   5  -1   2 2960.61   72.49
   5   1   3  606.51   18.00
   5   1   3  499.80   20.21
  -5   1  -3  578.20    7.30
  -5  -1  -3  543.98    7.35
   5  -1   3  581.79   17.23
   5  -1   3  483.34   24.91
   5   1   4 3487.22   92.26
   5   1   4 3022.57   81.25
  -5   1  -4 3316.14   88.32
   5  -1   4 3314.07   87.69
  -5  -1  -4 3185.85   84.80
   5  -1   4 3219.65   85.95
   5   1   5 1383.73   37.76
   5   1   5 1206.28   34.12
  -5   1  -5 1308.45   38.33
   5  -1   5 1362.59   37.18
  -5  -1  -5 1263.14   34.38
   5  -1   5 1274.97   35.92
   5   1   6  692.97   22.47
   5   1   6  584.55   22.79
  -5   1  -6  666.13    8.28
  -5  -1  -6  660.03    7.80
   5  -1   6  656.66    8.11
   5  -1   6  657.78   23.85
   5   1   7    5.48    4.49
   5   1   7   15.97   10.05
  -5   1  -7    4.44    2.98
  -5  -1  -7    3.78    3.07
   5  -1   7    6.32    4.38
   5  -1   7    9.71   11.65
   5   1   8    6.28    4.82
   5   1   8   -3.24   10.26
   5  -1   8   13.89    9.62
   5  -1   8    7.07    3.60
  -5  -1  -8    6.64    3.10
   5  -1   8    4.71    3.61
   5   1   9   26.73    9.00
   5   1   9   18.19   13.82
   5  -1   9   35.07   10.20
   5  -1   9   30.83    5.21
  -5  -1  -9   18.59    8.59
   5  -1   9   17.01    3.38
   5   1  10   38.17    9.27
   5   1  10   28.19   10.94
   5  -1  10   30.02   10.40
   5  -1  10   31.54    9.02
  -5  -1 -10   27.80    6.53
   5  -1  10   14.70    4.43
   5   1  11   41.94   16.70
   5   1  11   46.04   12.63
   5  -1  11   35.57   10.75
   5  -1  11   48.22    6.80
   5  -1  11   23.01    2.94
   5   1  12    7.79    8.86
   5   1  12   12.21    3.59
   5  -1  12    9.06   11.64
   5  -1  12   18.44    5.85
   5   1  13   18.71    8.60
   5  -1  13   37.09   18.99
   5   1  14   -1.51   12.51
   5  -1  14    3.19    8.42
   5   1  15   15.05   12.24
   5  -1  15    2.40    9.23
   5  -1  16   34.22   18.46
   5   1  17   -1.47   10.57
   5  -1  17   12.91    8.35
   5   1  18   20.80   11.79
   5  -1  18   15.04   11.71
   5   1  19   -8.25   10.68
   5  -1  19    7.10   12.28
  -5  -2  21   37.11    7.72
  -5   2  20   -4.87    4.01
  -5  -2  20    6.68    5.12
  -5   2  19   26.50    8.54
  -5  -2  19   39.38    6.91
   5   2 -18    8.91    6.36
  -5   2  18   24.53    7.29
  -5  -2  18   18.51    8.33
  -5   2  17   20.03    7.29
   5   2 -17   19.42    4.54
  -5  -2  17   31.92    6.53
   5  -2 -17   19.57   10.07
  -5   2  16   91.55    7.73
   5   2 -16  129.92    6.18
  -5  -2  16  128.55   10.95
   5  -2 -16  116.99    8.95
   5   2 -15   29.23    6.92
  -5   2  15   16.77    5.27
  -5  -2  15   11.61    7.03
  -5  -2  15   11.71    5.32
   5  -2 -15   20.92    7.94
   5  -2 -15    3.79    1.92
   5  -2 -15    7.76    2.54
   5   2 -14  648.17   21.03
  -5   2  14  467.44   14.69
   5  -2 -14  565.85   17.90
   5  -2 -14  558.21   17.84
  -5  -2  14  525.00   18.47
  -5  -2  14  607.54   24.22
   5  -2 -14  310.00   10.78
   5   2 -13   51.50    5.17
   5   2 -13   57.96   16.12
  -5   2  13   41.02    4.64
  -5  -2  13   58.08   15.39
  -5  -2  13   50.65    4.22
   5  -2 -13   49.16   17.14
   5  -2 -13   47.57    5.95
   5  -2 -13   28.82    3.69
   5   2 -12  541.49   16.17
   5   2 -12  619.53   21.69
  -5   2  12  402.06   11.64
  -5  -2  12  577.53   16.86
   5  -2 -12  539.71   16.95
  -5  -2  12  484.15   19.81
   5  -2 -12  539.62   15.54
   5  -2 -12  275.43    9.35
   5   2 -11  126.26    6.05
   5   2 -11  134.66    7.68
  -5   2  11   91.10    3.62
   5  -2 -11  129.69    3.19
   5  -2 -11  117.04    6.38
  -5  -2  11  121.12    5.92
  -5  -2  11  137.25    8.49
   5   2 -10  283.81   12.24
   5   2 -10  273.24   10.30
  -5   2  10  250.10   17.84
   5  -2 -10  260.65    9.25
   5  -2 -10  296.85   11.19
   5  -2 -10  275.04   11.37
  -5  -2  10  249.92   10.79
  -5  -2  10  278.54   10.23
   5   2  -9  113.13   21.41
   5   2  -9  124.11    6.38
  -5   2   9  116.07    9.28
   5  -2  -9  113.04    4.01
   5  -2  -9  140.93    7.47
   5  -2  -9  120.53    8.50
  -5  -2   9  111.40    7.15
  -5  -2   9  118.86   12.32
   5   2  -8   37.25   10.26
   5   2  -8   34.11   20.34
  -5   2   8   30.12   12.55
   5  -2  -8   38.66    4.27
   5  -2  -8   30.62    3.66
   5  -2  -8   44.36   12.42
  -5  -2   8   31.28   12.00
  -5  -2   8   32.67   13.53
   5   2  -7  408.82   18.56
   5   2  -7  395.20   23.07
  -5   2   7  362.80   20.17
  -5  -2   7  389.22   18.70
   5  -2  -7  293.05   13.15
   5  -2  -7  381.03   20.27
  -5  -2   7  334.54   16.09
   5  -2  -7  396.40   17.75
   5   2  -6   36.08   16.95
  -5   2   6   22.59    9.24
   5  -2  -6   23.62    5.42
  -5  -2   6   10.87    3.66
  -5  -2   6   25.05    9.52
   5  -2  -6   29.97    8.34
  -5  -2   6   23.44    8.88
   5  -2  -6   13.60    3.76
   5   2  -5  616.87   18.55
  -5   2   5  621.06    4.93
  -5   2   5  571.46    8.96
  -5  -2   5  429.46   14.36
  -5  -2   5  625.71    7.79
   5  -2  -5  594.30   18.93
  -5  -2   5  542.92   11.35
   5  -2  -5  597.55   15.08
   5   2  -4   26.00   13.31
  -5   2   4   13.12    5.47
  -5   2   4    9.51    3.67
  -5  -2   4   10.28    2.90
  -5  -2   4   14.81    4.45
   5  -2  -4   12.28    6.14
  -5  -2   4   16.86    7.09
   5  -2  -4   13.07    5.02
  -5   2   3  927.19   23.04
   5   2  -3 1008.38   27.36
   5   2  -3  683.49   18.49
  -5   2   3  909.59   23.75
  -5  -2   3  747.91   19.33
   5  -2  -3  992.49   25.62
   5  -2  -3  938.16   23.26
  -5   2   2  132.41    7.16
   5   2  -2  101.74   20.94
   5   2  -2  157.57   18.79
  -5   2   2  139.28   11.99
   5  -2  -2  140.12   10.90
   5  -2  -2  130.67    8.34
  -5  -2   2  145.53    8.91
  -5  -2   2  108.90    7.20
  -5   2   1   42.95    3.98
   5   2  -1   31.37    7.45
   5   2  -1   45.27   17.47
  -5   2   1   47.04   15.65
   5  -2  -1   45.91   13.53
   5  -2  -1   49.67    6.91
  -5  -2   1   37.49    5.77
  -5  -2   1   33.30   10.74
  -5   2   0  791.77   20.58
   5   2   0  682.25   20.42
   5   2   0  879.89   24.89
  -5   2   0  809.30   25.62
   5  -2   0  841.03   23.94
   5  -2   0  825.99   22.07
  -5  -2   0  800.99   22.38
  -5  -2   0  676.00   18.65
  -5   2  -1  338.16   15.95
   5   2   1  299.45   21.66
   5   2   1  385.99   20.26
  -5   2  -1  348.22   16.79
   5  -2   1  348.21   18.03
   5  -2   1  350.62   17.08
  -5  -2  -1  334.85   20.35
  -5  -2  -1  286.37   14.07
   5   2   2 2375.19   58.57
  -5   2  -2 2104.20   51.54
  -5   2  -2 2186.28   56.77
   5  -2   2 2212.02   58.33
  -5  -2  -2 2149.77   52.61
   5  -2   2 2248.80   55.67
   5   2   3 1604.53   43.74
   5   2   3 1320.15   38.69
  -5   2  -3 1552.48   41.81
   5  -2   3 1578.76   43.06
  -5  -2  -3 1478.29   40.03
   5  -2   3 1583.28   44.01
   5   2   4 1525.32   41.62
   5   2   4 1243.75   36.45
   5  -2   4 1454.48   42.89
  -5  -2  -4 1433.33   39.02
   5  -2   4 1519.15   41.75
   5  -2   4  732.23   25.70
   5   2   5 1134.99   45.12
   5   2   5  932.34   32.38
   5  -2   5 1076.56   35.60
  -5  -2  -5 1020.33   32.15
   5  -2   5 1095.62   34.70
   5  -2   5  569.38   19.52
   5   2   6 1348.86   42.06
   5   2   6 1106.90   37.16
   5  -2   6 1260.59   42.37
  -5  -2  -6 1157.07   36.10
   5  -2   6 1285.80   41.61
   5   2   7  211.98   10.67
   5   2   7  155.06   13.07
   5  -2   7  197.21   15.02
   5  -2   7  210.92   13.84
  -5  -2  -7  190.91    9.63
   5  -2   7  102.47    6.04
   5   2   8  125.41    7.27
   5   2   8   98.26   10.56
   5  -2   8  142.55   21.50
   5  -2   8  131.78   14.79
  -5  -2  -8  102.83    4.73
   5  -2   8   61.75    7.85
   5   2   9    6.37    4.78
   5   2   9    0.66   11.25
   5  -2   9    8.68    9.84
   5  -2   9    4.04    2.14
  -5  -2  -9    3.57    2.74
   5  -2   9    2.99    3.67
   5   2  10   95.53    7.90
   5   2  10   99.48   16.55
   5  -2  10  105.19   10.11
  -5  -2 -10   75.76   10.94
   5  -2  10   85.32    5.56
   5  -2  10   63.62    4.06
   5   2  11  163.21    7.09
   5   2  11  136.41   17.36
   5  -2  11  151.11   11.77
   5   2  12  131.82   12.98
   5   2  12  134.20    8.64
   5  -2  12  187.29   15.70
   5  -2  12  156.63    5.25
   5   2  13   62.13   20.91
   5  -2  13   40.16   11.69
   5   2  14   40.04   12.62
   5  -2  14   45.06   19.70
   5   2  15   11.56   11.71
   5  -2  15   -1.41   12.82
   5   2  16   14.37   12.28
   5  -2  16   38.82   16.64
   5   2  17   -7.03   10.97
   5  -2  17   18.99   11.21
   5   2  18   20.92   11.33
   5  -2  18   38.66   11.89
   5   2  19   34.39   14.02
   5  -2  19    6.67    5.98
  -5  -3  22   12.58    6.04
  -5  -3  21   26.99   10.58
  -5  -3  20   33.89   12.08
  -5   3  19    1.21    2.63
  -5  -3  19    3.94    5.32
   5   3 -18   82.10    6.27
  -5   3  18   69.27    6.10
  -5  -3  18   83.11   22.20
  -5   3  17    2.06    4.35
   5   3 -17   -0.40    3.58
  -5  -3  17   -0.61    4.94
   5  -3 -17   -0.60    1.86
  -5   3  16  191.83    7.29
   5   3 -16  251.63    7.62
  -5  -3  16  253.02   10.69
   5  -3 -16  233.56    6.31
  -5   3  15   37.74    5.88
   5   3 -15   47.35   16.03
  -5  -3  15   67.96   11.76
   5  -3 -15   53.51   12.10
   5  -3 -15   45.89    7.16
  -5   3  14  464.97   20.36
   5   3 -14  652.10   27.66
   5  -3 -14  610.80   19.72
   5  -3 -14  631.76   22.68
  -5  -3  14  683.28   22.94
  -5   3  13    2.57    2.46
   5   3 -13    1.68    1.64
   5  -3 -13    1.28    1.51
   5  -3 -13    0.78    1.76
  -5  -3  13    2.58    4.19
   5   3 -12 1079.97   36.40
  -5  -3  12 1043.54   37.20
   5  -3 -12 1019.32   34.43
   5  -3 -12  885.64   28.57
   5   3 -11   11.24    7.87
   5   3 -11   12.97    4.90
  -5  -3  11   13.64    6.46
   5  -3 -11   20.62    3.65
   5  -3 -11   12.25    6.53
   5  -3 -11    7.28    5.00
   5   3 -10  327.53   13.49
   5   3 -10  302.67   15.75
  -5  -3  10  302.54   11.64
   5  -3 -10  248.98    9.69
   5  -3 -10  316.69   12.84
   5  -3 -10  335.06   13.69
   5   3  -9  100.57   18.38
   5   3  -9  102.26   11.24
  -5  -3   9  110.78    6.86
   5  -3  -9   84.80    6.86
   5  -3  -9   97.34    6.09
   5  -3  -9  116.18    5.08
   5   3  -8  268.85   10.04
   5   3  -8  288.72   12.66
   5  -3  -8  279.37    9.17
  -5  -3   8  295.93   16.07
   5  -3  -8  281.00   13.01
   5  -3  -8  188.92    6.73
   5   3  -7   42.20   13.20
   5   3  -7   50.00   14.52
  -5  -3   7   40.17    8.38
   5  -3  -7   44.63   10.58
   5  -3  -7   61.54   10.26
   5  -3  -7   27.02    5.18
  -5   3   6  853.14   31.59
   5   3  -6  873.82   34.97
   5  -3  -6  854.53   32.04
  -5  -3   6  883.89   38.89
   5  -3  -6  802.18   31.84
  -5  -3   6  500.85   19.41
  -5   3   5  447.87   20.07
   5   3  -5  464.50   24.04
   5  -3  -5  453.93   20.53
  -5  -3   5  476.74   26.03
   5  -3  -5  423.81   21.01
  -5  -3   5  296.22   14.33
   5   3  -4 1088.31   29.03
  -5   3   4 1143.69   28.14
   5  -3  -4 1166.91   29.12
  -5  -3   4  771.91   20.13
   5  -3  -4 1002.70   27.30
  -5  -3   4 1204.04   30.50
   5   3  -3   42.77    9.68
  -5   3   3   39.05    4.32
   5  -3  -3   36.84   13.99
  -5  -3   3   30.83    7.36
   5  -3  -3   41.05   19.23
  -5  -3   3   27.01   18.18
  -5   3   2   25.04    9.18
   5   3  -2   39.10    9.67
   5   3  -2   30.95    9.23
  -5  -3   2   21.23    5.56
   5  -3  -2   23.84   16.39
   5  -3  -2   24.09   10.35
  -5   3   1    3.06    3.89
   5   3  -1    2.97    8.23
   5   3  -1    6.20    8.08
  -5  -3   1    6.26    5.38
   5  -3  -1    9.49    8.92
   5  -3  -1    5.18    4.66
  -5   3   0  525.64   24.78
   5   3   0  404.55   21.43
   5   3   0  595.22   12.19
  -5  -3   0  449.73   22.37
   5  -3   0  552.58   26.11
   5  -3   0  553.65    9.75
  -5   3  -1 1063.02   29.42
   5   3   1  877.90   27.17
   5   3   1 1206.92   34.16
   5  -3   1 1126.51   31.10
   5  -3   1 1154.73   32.48
   5   3   2  291.43   11.02
   5   3   2  210.71   21.45
   5  -3   2  269.90   24.46
  -5  -3  -2  252.84   10.21
   5  -3   2  298.29   12.07
   5   3   3  567.73   25.16
   5   3   3  737.38   29.08
   5  -3   3  716.71   28.99
   5  -3   3  716.88   28.21
   5   3   4 1327.53   41.94
   5   3   4 1806.05   55.80
   5  -3   4 1722.43   53.98
   5  -3   4 1715.50   53.00
   5   3   5  373.49   15.44
   5   3   5  274.49   16.63
   5  -3   5  346.06   16.18
  -5  -3  -5  330.27   13.00
   5  -3   5  353.94   14.52
   5   3   6  887.39   24.85
   5   3   6  719.72   23.88
   5  -3   6  864.80   26.44
  -5  -3  -6  760.88   21.84
   5  -3   6  879.99   28.02
   5   3   7  520.84   21.75
   5   3   7  428.24   19.48
   5  -3   7  528.03   21.83
  -5  -3  -7  450.79   13.99
   5  -3   7  529.86   19.34
   5   3   8   42.20   13.08
   5   3   8   30.22   19.38
   5  -3   8   47.70   21.30
  -5  -3  -8   37.24   11.59
   5  -3   8   40.14   14.85
   5  -3   8   23.28    9.14
   5   3   9  163.33    7.18
   5   3   9  134.79   11.64
   5  -3   9  167.34   13.50
  -5  -3  -9  149.33    6.05
   5  -3   9  180.84   10.05
   5  -3   9  111.25    5.54
   5   3  10  258.37   12.46
   5   3  10  252.41   43.22
   5  -3  10  269.95   17.01
   5  -3  10  253.66   11.34
  -5  -3 -10  224.16    5.42
   5  -3  10  174.91    5.32
   5   3  11   11.07   12.80
   5   3  11    9.53    3.29
   5  -3  11   13.38   11.22
   5  -3  11    7.09    4.64
   5   3  12  427.98   24.46
   5   3  12  403.21   14.92
   5  -3  12  490.89   18.46
   5  -3  12  480.85   13.88
   5   3  13   -7.54   12.86
   5  -3  13    3.58    6.25
   5   3  14   22.35   11.71
   5  -3  14   56.62   11.88
   5   3  15    5.78   11.10
   5  -3  15  -10.37   11.53
   5   3  16   -4.97    9.74
   5  -3  16   -9.85   12.10
   5   3  17   -5.85   10.87
   5  -3  17   11.41    8.97
   5   3  18   34.88   13.29
   5  -3  18   49.45   25.87
   5   3  19   -4.70    9.88
   5  -3  19    2.93    8.94
  -5  -4  22   13.38    8.69
  -5  -4  21    4.45    6.36
  -5  -4  20   56.04   10.86
  -5   4  19   -1.78    3.90
  -5  -4  19   -1.18    5.58
   5   4 -18   95.28   14.13
  -5   4  18   83.72    7.44
  -5  -4  18  119.35    9.16
  -5   4  17   10.21    6.06
   5   4 -17    8.82    7.94
  -5  -4  17    8.61    4.81
   5  -4 -17   11.67    5.16
  -5   4  16  169.67    7.80
   5   4 -16  253.02    9.68
  -5  -4  16  272.23   15.76
   5  -4 -16  255.09   11.64
  -5   4  15  107.03    9.49
   5   4 -15  150.53   13.30
  -5  -4  15  135.77   21.43
   5  -4 -15  144.76    9.11
   5   4 -14  374.78   14.38
  -5  -4  14  420.84   16.95
   5  -4 -14  433.25   18.42
   5  -4 -14  373.92   16.89
   5  -4 -14  319.05   13.16
   5   4 -13   84.65    8.19
  -5  -4  13   75.53    5.02
   5  -4 -13   89.64    4.84
   5  -4 -13   78.35   25.39
   5  -4 -13   73.46    3.98
   5   4 -12  593.41   21.69
  -5  -4  12  603.00   21.14
   5  -4 -12  640.96   21.53
   5  -4 -12  590.09   21.35
   5  -4 -12  483.00   17.02
   5   4 -11   40.88    8.72
  -5  -4  11   47.00   15.33
   5  -4 -11   43.92   14.76
   5  -4 -11   42.35   13.72
   5  -4 -11   20.97    9.24
   5   4 -10  368.52   18.75
  -5  -4  10  368.95   16.88
   5  -4 -10  384.60   16.16
   5  -4 -10  362.15   18.91
   5  -4 -10  278.64   11.70
   5   4  -9   25.87    9.33
  -5  -4   9   14.90    5.43
   5  -4  -9   24.09    9.54
   5  -4  -9   14.72   11.87
   5  -4  -9   16.77    3.16
   5   4  -8  824.97   27.66
   5  -4  -8  814.43   27.11
  -5  -4   8  803.04   31.77
   5  -4  -8  765.15   28.27
   5  -4  -8  570.15   18.49
   5   4  -7  442.04   17.84
  -5  -4   7  470.94   27.46
   5  -4  -7  463.44   19.23
   5  -4  -7  420.56   16.43
   5  -4  -7  286.36   10.73
  -5   4   6 1509.02   40.32
   5   4  -6 1560.79   43.61
  -5  -4   6 1524.07   41.69
   5  -4  -6 1582.88   44.00
   5  -4  -6 1518.30   40.88
  -5   4   5    2.14    3.40
   5   4  -5   -5.40    8.57
   5  -4  -5   -0.61    4.27
  -5  -4   5    1.19    3.36
   5  -4  -5    1.22    4.83
  -5  -4   5    1.10    2.55
   5   4  -4  828.12   33.35
  -5   4   4  806.28   31.53
  -5  -4   4  857.94   33.37
   5  -4  -4  848.18   33.63
   5  -4  -4  815.38   30.79
   5   4  -3  267.72   15.89
  -5   4   3  247.54    8.83
  -5  -4   3  255.42   23.79
   5  -4  -3  251.47   13.35
   5  -4  -3  262.61   10.47
   5   4  -2    9.18    4.15
  -5   4   2   -0.21    4.35
  -5  -4   2   10.48    6.74
   5  -4  -2   -0.18    7.97
   5  -4  -2    8.28    6.08
  -5   4   1  624.99   24.23
   5   4  -1  453.65   29.56
   5   4  -1  676.66   28.11
   5  -4  -1  664.22   26.27
   5  -4  -1  676.34   27.71
   5   4   0  695.65   13.30
   5   4   0 1025.50   30.13
   5  -4   0 1034.49   29.41
   5  -4   0 1010.58   31.83
   5   4   1  566.01   23.13
   5   4   1  821.60   32.57
   5  -4   1  830.80   32.12
   5  -4   1  825.79   40.03
   5   4   2  524.44   19.22
   5   4   2  750.03   26.55
   5  -4   2  697.42   23.00
   5  -4   2  721.57   29.03
   5   4   3   27.73    8.57
   5   4   3   43.55    7.89
   5  -4   3   49.44   18.22
   5  -4   3   48.59   13.86
   5   4   4   31.69    8.27
   5   4   4   58.81    9.29
   5  -4   4   34.12   16.57
   5  -4   4   44.95   13.36
   5   4   5   -5.18    8.50
   5   4   5    6.92    3.83
   5  -4   5   14.15    8.47
   5  -4   5    8.83    7.14
   5   4   6    2.22    9.70
   5   4   6    1.59    5.36
   5  -4   6   15.25    9.35
   5  -4   6    3.89    5.41
   5   4   7   95.40   13.59
   5   4   7  133.17   11.05
   5  -4   7  137.25   36.94
   5  -4   7  119.10   11.24
   5   4   8    0.58   10.47
   5   4   8    7.93    5.35
   5  -4   8    9.58    9.66
   5  -4   8    3.19    3.79
   5   4   9   96.20   38.92
   5   4   9  110.93   14.30
   5  -4   9  128.21   41.08
   5  -4   9  123.73   16.91
   5   4  10  104.39   12.18
   5   4  10   94.68    9.57
   5  -4  10  140.75   25.46
   5  -4  10  114.02   10.22
   5   4  11   -4.31   13.23
   5   4  11    1.58    4.67
   5  -4  11   -2.26    9.86
   5  -4  11   11.99    5.09
   5   4  12  166.92   26.76
   5   4  12  153.22    5.85
   5  -4  12  163.04   20.66
   5  -4  12  168.33    7.94
   5   4  13   16.36   12.19
   5  -4  13   12.44   10.71
   5   4  14   96.23   16.91
   5  -4  14  114.96   16.15
   5   4  15    2.33   10.49
   5  -4  15    2.40    7.25
   5   4  16   12.56   10.46
   5  -4  16   19.76   13.48
   5   4  17   33.01   11.45
   5  -4  17   27.29   10.91
   5   4  18   55.42   16.47
   5  -4  18  111.50   17.18
  -5  -5  22   -0.31    5.53
  -5  -5  21   11.93    7.51
  -5  -5  20   14.22    6.02
  -5   5  19   14.34    5.79
  -5  -5  19    7.70    4.03
   5   5 -18   97.70    6.62
  -5  -5  18  132.04   14.31
   5   5 -17   42.04   19.01
   5  -5 -17   64.16   11.72
   5  -5 -17   57.19   12.10
  -5  -5  17   63.15   14.97
   5   5 -16  366.48   14.19
   5  -5 -16  487.60   16.98
   5  -5 -16  424.03   16.51
  -5  -5  16  459.52   18.90
   5   5 -15  257.32   11.55
   5  -5 -15  302.54   10.04
   5  -5 -15  275.23   10.04
  -5  -5  15  290.03   15.24
   5   5 -14  221.47   14.22
   5  -5 -14  256.61   11.12
   5  -5 -14  240.37    8.99
  -5  -5  14  231.88    8.24
   5   5 -13  423.49   16.78
   5  -5 -13  496.42   16.40
   5  -5 -13  435.20   15.99
  -5  -5  13  451.54   16.38
   5   5 -12   62.08   10.74
   5  -5 -12   70.04    7.16
   5  -5 -12   50.36   19.42
  -5  -5  12   80.97    8.32
   5   5 -11  281.60   15.29
  -5  -5  11  276.10   11.40
   5  -5 -11  299.99   21.52
   5  -5 -11  291.14   12.58
   5  -5 -11  204.36    7.49
   5   5 -10   75.11    9.08
  -5  -5  10   78.60    8.00
   5  -5 -10   61.40   10.85
   5  -5 -10   60.51   20.34
   5  -5 -10   41.51    7.11
   5   5  -9   75.68   11.17
   5  -5  -9   87.25    6.02
  -5  -5   9   73.94    6.95
   5  -5  -9   73.00   25.53
   5  -5  -9   42.62    5.74
   5   5  -8  413.74   20.03
  -5  -5   8  419.71   19.14
   5  -5  -8  434.86   14.80
   5  -5  -8  431.60   15.64
   5  -5  -8  290.80   14.07
   5   5  -7  415.47   19.73
  -5  -5   7  442.54   15.73
   5  -5  -7  444.59   16.87
   5  -5  -7  437.56   15.78
   5  -5  -7  269.19   12.17
  -5   5   6  818.10   27.24
   5   5  -6  839.18   32.83
  -5  -5   6  873.23   30.87
   5  -5  -6  875.35   29.35
   5  -5  -6  863.61   27.80
  -5   5   5  800.27   26.52
   5   5  -5  788.19   26.69
  -5  -5   5  832.41   28.13
   5  -5  -5  824.08   28.60
   5  -5  -5  833.58   27.06
   5   5  -4  850.01   29.42
  -5   5   4  813.41   26.10
  -5  -5   4  883.79   30.98
   5  -5  -4  861.99   31.55
   5  -5  -4  849.39   27.37
   5   5  -3   17.08   13.61
  -5  -5   3   21.96    9.60
   5  -5  -3   30.58   12.04
   5  -5  -3   18.70   10.39
   5   5  -2   34.59    9.49
  -5  -5   2   28.33   14.35
   5  -5  -2   24.20   15.59
   5  -5  -2   33.09    7.92
   5   5  -1 1403.22   45.52
  -5  -5   1 1546.77   48.80
   5  -5  -1 1463.18   51.43
   5  -5  -1 1432.96   45.05
   5   5   0  485.73   19.57
  -5  -5   0  557.02   20.98
   5  -5   0  518.32   20.23
   5  -5   0  493.24   18.85
   5   5   1  339.67   16.94
   5   5   1  522.23   27.88
   5  -5   1  509.87   23.41
   5  -5   1  520.26   20.78
   5   5   2  516.07   19.11
   5   5   2  683.34   21.86
   5  -5   2  720.04   22.32
   5  -5   2  737.58   23.11
   5   5   3   34.56    8.33
   5   5   3   18.86    8.90
   5  -5   3   28.79   13.83
   5  -5   3   35.65   11.72
   5   5   4  110.31   12.86
   5   5   4  138.00    9.95
   5  -5   4  153.62   13.45
   5  -5   4  145.04    9.88
   5   5   5   24.51    9.57
   5   5   5   20.32    7.05
   5  -5   5   24.05    9.15
   5  -5   5   13.69    7.15
   5   5   6    3.30    9.81
   5   5   6    7.25    4.24
   5  -5   6    8.20    9.29
   5  -5   6    6.40    6.54
   5   5   7   85.66   41.78
   5   5   7   81.13   23.51
   5  -5   7   92.99   33.95
   5  -5   7   93.65   19.77
   5   5   8    2.15   11.22
   5   5   8    1.62    5.65
   5  -5   8   14.98    9.99
   5  -5   8   -1.56    5.07
   5   5   9   54.31   16.67
   5   5   9   39.23   13.33
   5  -5   9   60.03   19.35
   5  -5   9   41.67   20.17
   5   5  10   74.14   15.92
   5   5  10   53.10    9.11
   5  -5  10   77.11    9.41
   5  -5  10   68.38   10.23
   5   5  11    3.17   12.33
   5   5  11    2.16    4.20
   5  -5  11   10.17    9.40
   5  -5  11    6.17    3.94
   5   5  12   83.64    5.98
   5  -5  12  108.41    6.32
   5  -5  12  122.75   17.08
   5   5  13   17.36   12.83
   5  -5  13   19.45   10.34
   5   5  14   63.76   18.94
   5  -5  14   97.83   30.77
   5   5  15   17.52   13.39
   5  -5  15   46.49   14.60
   5   5  16   59.09   20.70
   5  -5  16  100.43   10.51
   5   5  17   33.50   17.26
   5  -5  17   30.07    9.01
  -5  -6  22   16.44    5.99
  -5  -6  21   13.30    7.91
  -5  -6  20    2.57    4.60
  -5  -6  19    1.80    6.68
   5   6 -18   86.66    7.39
  -5  -6  18  103.08   28.40
   5   6 -17   60.62    7.63
   5  -6 -17   50.90   23.98
   5  -6 -17   67.39   10.66
  -5  -6  17   51.38   17.83
   5   6 -16   77.60   15.84
   5  -6 -16  109.23   12.18
   5  -6 -16   86.92   11.37
  -5  -6  16   83.65   27.22
   5   6 -15  342.10   14.40
   5  -6 -15  426.12   15.75
   5  -6 -15  372.11   14.62
  -5  -6  15  413.62   18.48
   5   6 -14   53.74   18.27
   5  -6 -14   50.71   17.62
   5  -6 -14   67.14   18.10
  -5  -6  14   84.44    8.64
   5   6 -13  880.19   52.72
   5  -6 -13 1163.31   13.98
   5  -6 -13 1021.22   25.26
  -5  -6  13 1016.83   15.35
   5   6 -12   19.61   11.32
   5  -6 -12   27.13   11.82
  -5  -6  12   16.42    7.69
   5   6 -11  675.71   24.88
   5  -6 -11  791.38   24.77
   5  -6 -11  704.88   36.58
  -5  -6  11  728.66   24.05
   5   6 -10   56.52   12.77
   5  -6 -10   76.11    9.57
   5  -6 -10   67.49   18.91
  -5  -6  10   74.57    9.17
   5   6  -9  147.71   13.42
   5  -6  -9  148.10    7.09
   5  -6  -9  166.35   12.23
  -5  -6   9  157.13   10.52
   5   6  -8  487.73   20.41
  -5  -6   8  491.55   19.69
   5  -6  -8  486.84   21.50
   5  -6  -8  487.15   17.09
   5   6  -7  118.00   13.30
   5  -6  -7  106.37   17.01
   5  -6  -7   95.97   30.15
  -5  -6   7  109.94   11.01
   5   6  -6   54.51   18.14
  -5  -6   6   64.53   19.07
   5  -6  -6   57.66   18.20
   5  -6  -6   57.68    7.21
   5   6  -5  126.13   10.64
  -5  -6   5  133.46   12.89
   5  -6  -5  131.79   16.83
   5  -6  -5  137.19    9.94
   5   6  -4    9.35    8.63
  -5  -6   4   -0.55    6.92
   5  -6  -4   -0.09    8.15
   5  -6  -4   -1.24    5.77
   5   6  -3   28.92   12.91
  -5  -6   3   31.59    6.52
   5  -6  -3   16.21   15.82
   5  -6  -3   16.09    8.35
   5   6  -2   31.27   15.90
   5  -6  -2   41.96   15.70
  -5  -6   2   36.73   12.76
   5   6  -1   58.53   17.35
   5  -6  -1   55.23    7.25
  -5  -6   1   59.37   18.00
   5   6   0  131.37   11.31
   5  -6   0  128.24   11.55
  -5  -6   0  139.67   38.32
   5   6   1   -3.26    7.62
  -5  -6  -1   -3.32    9.13
   5  -6   1    0.12    4.84
   5  -6   1   -0.09    7.16
   5   6   2  319.96   14.28
   5   6   2  501.77   21.04
   5  -6   2  535.58   20.72
   5  -6   2  522.54   20.29
   5   6   3   15.38    8.02
   5   6   3   14.52    9.47
   5  -6   3    5.53    6.58
   5  -6   3   10.74    7.79
   5   6   4  282.13   16.00
   5   6   4  382.96   18.68
   5  -6   4  446.15   19.38
   5  -6   4  436.63   18.79
   5   6   5  114.12   11.56
   5   6   5  155.92   15.98
   5  -6   5  180.95   10.74
   5  -6   5  182.68   14.39
   5   6   6   50.41   14.27
   5   6   6   42.20   11.08
   5  -6   6   44.95   20.71
   5  -6   6   38.89   14.37
   5   6   7   57.40    9.71
   5   6   7   55.10   17.36
   5  -6   7   71.82   22.58
   5  -6   7   79.89    6.73
   5   6   8    7.47   10.74
   5   6   8    6.31    5.36
   5  -6   8   -0.76   10.62
   5  -6   8    6.14    4.20
   5   6   9   -3.39   11.33
   5   6   9    1.44    5.57
   5  -6   9   14.00   10.40
   5  -6   9   -0.48    5.64
   5   6  10   15.91    9.71
   5   6  10   22.86    9.07
   5  -6  10   13.49    8.61
   5  -6  10   15.00    7.17
   5   6  11   92.27   17.12
   5   6  11   64.82    8.15
   5  -6  11   76.32   25.84
   5  -6  11   61.32   22.14
   5   6  12    5.17    9.01
   5   6  12   -0.05    3.88
   5  -6  12    4.59    3.80
   5  -6  12    6.01    4.38
   5   6  13   59.40   16.27
   5  -6  13   90.59   11.77
   5   6  14    5.40    6.17
   5  -6  14   -0.04   11.72
   5   6  15   76.56   14.93
   5  -6  15   79.60   22.44
   5   6  16   50.24   18.96
   5  -6  16   58.16   23.55
   5   6  17   20.80   11.55
   5  -6  17   10.39    9.71
  -5  -7  21    7.61    5.92
  -5  -7  20    4.85    7.26
  -5  -7  19    7.42    7.67
   5   7 -18   13.18    7.79
  -5  -7  18   13.53    6.88
   5   7 -17   37.89    7.93
   5  -7 -17   31.18   16.11
   5  -7 -17   29.43   18.23
   5   7 -16   12.96    7.51
   5  -7 -16   21.75    8.96
   5  -7 -16   18.02    6.31
  -5  -7  16   16.67    8.03
   5   7 -15  123.03    9.80
   5  -7 -15  151.93    7.94
   5  -7 -15  123.92   15.09
  -5  -7  15  137.50   13.71
   5   7 -14   14.10    8.30
   5  -7 -14    8.70    6.77
   5  -7 -14    7.54    4.58
  -5  -7  14    9.66    7.63
   5   7 -13  557.79   21.84
   5  -7 -13  679.37   22.52
   5  -7 -13  580.04   38.64
  -5  -7  13  653.24   45.64
   5   7 -12    2.54    7.80
   5  -7 -12    2.44    4.97
   5  -7 -12    4.24    7.72
  -5  -7  12    4.23    7.15
   5   7 -11  907.80   41.52
   5  -7 -11 1065.56   45.81
   5  -7 -11  950.20   59.03
  -5  -7  11 1034.27   51.06
   5   7 -10   97.52   38.95
   5  -7 -10  104.03   10.08
   5  -7 -10  103.46   38.31
  -5  -7  10  107.73   14.08
   5   7  -9  425.43   20.45
   5  -7  -9  461.89   16.59
   5  -7  -9  463.48   19.40
  -5  -7   9  481.82   19.38
   5   7  -8   53.00    9.87
  -5  -7   8   56.99   15.66
   5  -7  -8   49.59   22.95
   5  -7  -8   43.98    8.75
   5   7  -7   11.96    8.57
   5  -7  -7    6.10    6.11
   5  -7  -7    2.87    4.18
  -5  -7   7   -0.24    6.76
   5   7  -6    9.66    7.47
  -5  -7   6    0.45    3.74
   5  -7  -6    8.06    6.81
   5   7  -5  109.90   10.06
  -5   7   5   68.80   14.77
  -5  -7   5  129.49   18.06
   5  -7  -5  131.17   10.03
   5   7  -4   17.74    8.95
  -5   7   4   19.77   10.52
  -5  -7   4   37.84    7.44
   5  -7  -4   34.39   10.01
   5   7  -3   14.31    9.24
  -5   7   3   -1.17    8.99
  -5  -7   3    5.38    6.86
   5  -7  -3    8.94   10.43
   5   7  -2   21.70    9.97
  -5   7   2   11.26    9.46
  -5  -7   2   16.13    9.61
   5  -7  -2   13.59    8.88
   5   7  -1   10.46   11.70
  -5   7   1    9.50   10.69
  -5  -7   1   21.19   13.40
   5  -7  -1   19.56   12.18
   5   7   0  106.04   27.51
  -5   7   0   46.76   21.11
  -5  -7   0  116.69   39.19
   5  -7   0  113.25   32.54
   5   7   1   -2.28    5.86
  -5   7  -1    2.89    8.08
  -5  -7  -1    7.40    8.11
   5  -7   1   11.79   11.52
   5   7   2  591.83   21.80
  -5   7  -2  361.09   17.14
  -5  -7  -2  691.25   23.70
   5  -7   2  688.51   24.31
   5   7   3  106.92   28.69
  -5   7  -3   30.63    9.63
  -5  -7  -3  141.00   38.96
   5  -7   3  128.10    9.64
   5   7   4  403.46   15.91
   5   7   4  301.93   14.69
   5  -7   4  468.59   38.84
   5   7   5  155.10   13.85
   5   7   5  183.04    9.33
   5  -7   5  208.94   10.70
   5  -7   5  232.53   12.15
   5   7   6   17.72   10.15
   5   7   6   34.95   11.68
   5  -7   6   30.21   21.44
   5  -7   6   23.33   11.54
   5   7   7   17.88   10.45
   5   7   7   26.42    8.97
   5  -7   7   26.27   16.06
   5  -7   7   17.37   11.14
   5   7   8   -0.76   11.15
   5   7   8   15.37    6.63
   5  -7   8   16.96   13.79
   5  -7   8    9.45    6.34
   5   7   9   -5.75   11.80
   5   7   9    6.41    5.98
   5  -7   9   11.10    8.99
   5  -7   9    2.57    4.59
   5   7  10    7.37   12.12
   5   7  10    8.38    7.99
   5  -7  10   -1.53   11.21
   5  -7  10    3.14    3.41
   5   7  11   70.88   17.44
   5   7  11   70.96   13.69
   5  -7  11   71.15   23.04
   5  -7  11   63.64   20.02
   5   7  12   17.66   10.96
   5   7  12    8.13    4.66
   5  -7  12   23.88   10.42
   5  -7  12    9.37    7.69
   5   7  13   36.75   10.82
   5  -7  13   40.04   17.14
   5   7  14    6.95   10.44
   5  -7  14   10.55   12.57
   5   7  15   61.44   15.48
   5  -7  15   87.27   17.00
   5   7  16   16.51   14.79
   5  -7  16    9.58    8.85
  -5  -8  19    9.82    7.74
  -5  -8  18    3.33    4.83
   5   8 -17   37.61   12.94
   5  -8 -17   33.43    8.08
  -5  -8  17   36.84   18.27
   5   8 -16   -5.36    5.17
   5  -8 -16    2.54    4.98
   5  -8 -16   -5.69    4.25
  -5  -8  16    7.41    5.97
   5   8 -15   93.01   10.63
   5  -8 -15  114.74    9.44
   5  -8 -15   84.84   15.19
  -5  -8  15   94.19   10.99
   5   8 -14   -4.41    8.74
   5  -8 -14    5.97    3.83
   5  -8 -14    4.23    3.31
  -5  -8  14   -0.29    8.12
   5   8 -13  106.80   30.84
   5  -8 -13  149.37    7.42
   5  -8 -13  118.00   19.01
  -5  -8  13  139.60    9.81
   5   8 -12   19.62    9.99
   5  -8 -12   23.90    6.86
   5  -8 -12   12.35   10.58
  -5  -8  12   21.71    9.69
   5   8 -11  282.43   16.68
   5  -8 -11  377.34   14.72
   5  -8 -11  323.42   17.64
  -5  -8  11  368.10   34.14
   5   8 -10   -0.94    5.75
   5  -8 -10   -0.94    6.50
   5  -8 -10   -2.09    9.50
  -5  -8  10   -2.93    8.86
   5   8  -9  413.12   23.35
  -5  -8   9  465.85   18.93
   5  -8  -9  470.02   31.16
   5  -8  -9  436.40   27.73
   5   8  -8   21.89   15.56
  -5  -8   8   18.62    8.02
   5  -8  -8   17.53   15.18
   5  -8  -8   14.01   10.41
   5   8  -7   57.59   15.55
  -5   8   7   28.84    9.31
   5  -8  -7   65.05   23.56
  -5  -8   7   75.23   22.59
   5   8  -6   35.68   14.26
  -5   8   6   19.37   10.75
   5  -8  -6   36.22   10.63
  -5  -8   6   35.78   13.41
   5   8  -5   50.49   19.74
  -5   8   5   21.20    9.64
  -5  -8   5   60.32   11.32
   5  -8  -5   55.43   11.57
   5   8  -4   45.84   17.71
  -5   8   4   29.98   14.89
  -5  -8   4   50.11   12.78
   5  -8  -4   57.55   21.64
   5   8  -3   27.29   10.00
  -5   8   3   17.96    9.54
  -5  -8   3   49.02   13.37
   5  -8  -3   47.29    8.08
   5   8  -2   34.53   10.47
  -5   8   2   32.26   17.35
  -5  -8   2   42.53   14.52
   5  -8  -2   35.79    7.97
   5   8  -1   12.52    9.28
  -5   8   1   -0.92   10.81
  -5  -8   1    7.89   10.54
   5  -8  -1    8.73    9.67
   5   8   0   24.64   20.41
  -5   8   0   34.53   20.63
  -5  -8   0   78.17   12.22
   5  -8   0   62.79   13.45
   5   8   1  156.02   10.07
  -5   8  -1   95.32   12.02
  -5  -8  -1  191.41   13.34
   5  -8   1  186.48   14.41
   5   8   2  301.71   24.06
  -5   8  -2  176.66   16.66
  -5  -8  -2  371.47   24.50
   5  -8   2  334.51   20.57
   5   8   3  363.88   25.14
  -5   8  -3  194.98   18.34
  -5  -8  -3  455.78   28.79
   5  -8   3  404.17   22.60
   5   8   4  343.64   14.22
  -5   8  -4  223.54   16.55
  -5  -8  -4  488.40   19.64
   5  -8   4  468.36   20.01
   5   8   5   64.35    8.35
   5  -8   5   86.11   26.32
  -5  -8  -5  104.45   31.35
   5   8   6  104.06   11.49
  -5  -8  -6  144.56   44.63
   5  -8   6  121.96    9.68
   5  -8   6  125.61   38.95
   5   8   7   22.84   14.88
   5   8   7    4.61    8.95
   5  -8   7    8.66    4.98
   5  -8   7    6.49    4.87
   5   8   8    0.68    5.81
   5   8   8   13.80    9.66
   5  -8   8   -4.07   11.09
   5  -8   8   -1.56    6.35
   5   8   9   -8.57   11.17
   5   8   9   -2.49    6.10
   5  -8   9    3.81    5.14
   5  -8   9    3.31    4.96
   5   8  10   -2.02   11.70
   5   8  10    5.42    5.70
   5  -8  10  -10.89   11.03
   5  -8  10    2.73    3.62
   5   8  11   13.77   11.69
   5   8  11   16.06    8.03
   5  -8  11   13.17   10.04
   5  -8  11    9.80    6.75
   5   8  12   18.53   15.14
   5   8  12    1.13    3.23
   5  -8  12   18.94   13.45
   5  -8  12    8.66    5.43
   5   8  13   -6.24   10.76
   5  -8  13    6.74    5.20
   5   8  14   -4.02   11.65
   5  -8  14    2.62   12.13
   5   8  15   37.69   10.99
   5  -8  15   36.42   20.27
  -5  -9  18    5.55    6.31
   5   9 -17   36.17   10.64
  -5  -9  17   37.16   25.32
   5   9 -16    4.41    3.93
   5  -9 -16   -0.26    4.06
  -5  -9  16    3.06    4.57
   5   9 -15   33.74   10.71
   5  -9 -15   27.46    7.62
   5  -9 -15   23.35   11.12
  -5  -9  15   25.34   10.60
   5   9 -14   -6.03    7.56
   5  -9 -14    4.74    5.07
   5  -9 -14   -6.34    6.37
  -5  -9  14    1.68    6.13
   5   9 -13   19.54    7.62
   5  -9 -13   35.70    6.73
   5  -9 -13   21.01   12.22
  -5  -9  13   14.65    6.76
   5   9 -12    3.95    9.68
   5  -9 -12    5.91    3.41
   5  -9 -12   -1.20    7.71
  -5  -9  12   -1.35    8.62
   5   9 -11   35.59   15.32
   5  -9 -11   50.72   11.93
   5  -9 -11   46.44   18.25
  -5  -9  11   61.39   11.88
   5   9 -10  -21.33    9.90
   5  -9 -10   -0.15    7.01
   5  -9 -10    1.27   10.13
  -5  -9  10    4.40    9.92
   5   9  -9   71.85   28.87
   5  -9  -9   90.62   20.55
   5  -9  -9   87.33   34.65
  -5  -9   9   99.88   26.60
   5   9  -8   43.91   12.02
  -5   9   8   17.44    9.08
  -5  -9   8   35.81   16.72
   5  -9  -8   29.23   16.54
   5   9  -7   45.75   10.84
  -5   9   7   30.50    9.53
   5  -9  -7   50.57   10.37
  -5  -9   7   65.73   17.93
   5   9  -6   45.21   14.86
  -5   9   6   15.69   10.83
   5  -9  -6   24.49    7.97
  -5  -9   6   35.50   15.74
   5   9  -5   -5.98   11.09
  -5   9   5   -0.88   10.87
   5  -9  -5    7.98    8.63
  -5  -9   5   -3.51    8.94
   5   9  -4    4.94   11.18
  -5   9   4   -2.05   10.12
  -5  -9   4   12.17    9.12
   5  -9  -4   15.75   11.77
   5   9  -3   76.62   13.86
  -5   9   3   44.81   13.98
  -5  -9   3   86.12   15.87
   5  -9  -3   91.48   13.53
   5   9  -2   32.94   14.33
  -5   9   2   23.26   10.50
  -5  -9   2   17.71    9.65
   5  -9  -2   29.38    9.24
   5   9  -1  173.95   19.62
  -5   9   1  116.34   15.59
  -5  -9   1  202.33   29.65
   5  -9  -1  200.37   10.59
   5   9   0   61.21   17.99
  -5   9   0   40.65   11.34
  -5  -9   0   59.51   19.93
   5  -9   0   57.81   21.62
   5   9   1  318.10   18.77
  -5   9  -1  177.52   16.05
  -5  -9  -1  400.89   19.68
   5  -9   1  383.82   20.19
   5   9   2   79.18   26.75
  -5   9  -2   61.65   15.61
  -5  -9  -2  113.03   36.84
   5  -9   2  119.42   15.89
   5   9   3  313.83   17.67
  -5   9  -3  199.80   19.46
  -5  -9  -3  412.82   18.93
   5  -9   3  374.92   17.30
   5   9   4  101.92   14.86
  -5   9  -4   27.42   19.85
  -5  -9  -4  123.74   33.27
   5  -9   4  111.53   12.31
   5   9   5   93.35   13.55
  -5   9  -5   76.49   14.06
  -5  -9  -5  156.84   42.88
   5  -9   5  135.74   12.18
   5   9   6   91.98   13.54
   5  -9   6   93.48   34.17
  -5  -9  -6  116.69   27.35
   5   9   7    8.61    7.17
   5  -9   7    6.46   10.22
   5  -9   7   17.96    9.67
   5   9   8   25.16   10.48
  -5  -9  -8   35.06    9.24
   5  -9   8   10.24    3.97
   5  -9   8   13.29    7.01
   5   9   9   42.44    9.19
  -5  -9  -9   32.63   13.49
   5  -9   9   39.48   14.39
   5  -9   9   25.18   13.81
   5   9  10    2.13    6.24
  -5  -9 -10    0.14    5.71
   5  -9  10   -5.75    5.88
   5  -9  10    8.43    9.98
   5   9  11   39.66   10.86
   5   9  11   19.19   11.24
   5  -9  11   61.91   26.53
   5  -9  11   40.20   11.25
   5   9  12    4.32   11.09
   5  -9  12   -5.47   11.49
   5  -9  12    5.31    2.94
   5   9  13    4.16    8.62
   5  -9  13    5.69   10.38
   5  10 -16   -3.41    6.87
   5 -10 -16    3.30    3.12
  -5 -10  16    2.28    4.35
   5  10 -15   12.46    8.52
   5 -10 -15   10.34    4.46
  -5 -10  15    0.14    9.33
   5  10 -14   12.55   11.00
   5 -10 -14    7.53    4.46
   5 -10 -14    5.02    7.89
  -5 -10  14    7.62    6.72
   5  10 -13    5.62    7.88
   5 -10 -13    8.40    6.14
   5 -10 -13    5.22    6.68
  -5 -10  13   17.72    9.29
   5  10 -12    1.96    8.93
   5 -10 -12    6.39    3.05
   5 -10 -12    1.85    3.61
  -5 -10  12    7.42    7.71
   5  10 -11   19.18   13.59
   5 -10 -11   32.90    8.41
   5 -10 -11   12.02   11.21
  -5 -10  11   21.47    9.49
   5  10 -10   31.92   12.85
   5 -10 -10   31.56   19.15
   5 -10 -10   37.90   16.81
  -5 -10  10   47.62   14.42
   5  10  -9   27.57   10.36
   5 -10  -9    8.22    9.03
  -5 -10   9   13.84    6.14
   5  10  -8   -6.77   11.75
  -5  10   8    4.16    9.70
  -5 -10   8    1.95    8.74
   5 -10  -8    4.25    8.01
   5  10  -7   -2.74   10.48
  -5  10   7    2.36    7.30
   5 -10  -7    2.42    5.55
  -5 -10   7    1.12    3.64
   5  10  -6   33.38   10.83
  -5  10   6   10.83   11.88
   5 -10  -6   47.84   11.68
  -5 -10   6   49.10   13.94
   5  10  -5   22.21   13.76
  -5  10   5    5.93   10.84
   5 -10  -5   17.72   13.01
  -5 -10   5   12.16   10.44
   5  10  -4    2.48    5.87
  -5  10   4   25.98   14.51
  -5 -10   4    2.93    8.19
   5 -10  -4    9.22   10.02
   5  10  -3   92.66   26.80
  -5  10   3   95.98   16.33
  -5 -10   3  151.79   48.68
   5 -10  -3  149.25   39.83
   5  10  -2   59.99   12.50
  -5  10   2   14.28   11.50
  -5 -10   2   35.63   14.63
   5 -10  -2   29.47   17.58
   5  10  -1  235.61   16.16
  -5  10   1  158.86   16.75
  -5 -10   1  298.16   12.15
   5 -10  -1  284.58   14.53
   5  10   0   60.94   11.66
  -5  10   0   46.37   15.43
  -5 -10   0   86.12   10.88
   5 -10   0   55.89   21.06
   5  10   1  205.24   17.05
  -5  10  -1  143.82   17.24
  -5 -10  -1  288.83   15.38
   5 -10   1  263.73   12.85
   5  10   2   15.39    9.64
  -5  10  -2   18.63   11.48
  -5 -10  -2   10.08   10.68
   5 -10   2    9.91   10.66
   5  10   3  164.27   14.62
  -5  10  -3   95.54   17.65
  -5 -10  -3  187.65   39.17
   5 -10   3  186.37   18.21
   5  10   4   11.32   14.19
  -5  10  -4   -3.30   10.28
  -5 -10  -4   12.78    8.95
   5 -10   4   -0.24   11.26
   5  10   5  134.82   13.70
  -5  10  -5   65.20   14.76
  -5 -10  -5  145.00   46.09
   5 -10   5  127.90   51.63
   5  10   6    7.90    9.35
  -5  10  -6    5.10    9.85
  -5 -10  -6   17.39   13.06
   5 -10   6   12.13   10.32
   5  10   7   65.10   11.16
  -5 -10  -7   55.11   18.91
   5 -10   7   52.79   21.17
   5 -10   7   71.76   21.30
   5  10   8    9.50    7.94
  -5 -10  -8   -0.13    9.15
   5 -10   8    5.76    3.92
   5 -10   8   20.90    9.80
   5  10   9   16.72    7.69
  -5 -10  -9   26.51   16.51
   5 -10   9   40.61   14.91
   5 -10   9   21.35    8.96
   5  10  10    0.80    6.81
  -5 -10 -10    7.02    9.50
   5 -10  10   -2.48    7.20
   5 -10  10    6.47    9.61
   5  10  11   32.62    8.94
  -5 -10 -11   17.03   14.44
   5 -10  11   25.79    6.42
   5 -10  11   13.78   10.63
   5  11 -14    1.52    7.05
   5 -11 -14   -1.15    6.13
  -5 -11  14    1.66    6.44
   5  11 -13   11.59   14.43
   5 -11 -13   10.35    9.79
   5 -11 -13   13.52   10.12
  -5 -11  13   12.82    7.23
   5  11 -12   15.35    9.95
   5 -11 -12   24.90    6.16
   5 -11 -12    2.45    4.92
  -5 -11  12   12.14    9.83
   5  11 -11    3.28    3.90
   5 -11 -11   25.62   10.48
   5 -11 -11    8.49    5.17
  -5 -11  11   12.97    8.02
   5  11 -10   15.47   13.22
   5 -11 -10   20.20    6.88
   5 -11 -10   24.65   15.07
  -5 -11  10   53.94   13.74
   5  11  -9    7.98    9.84
  -5 -11   9   -1.59    9.34
   5 -11  -9    0.81    7.44
   5  11  -8   17.89   11.56
  -5  11   8    0.38    9.57
  -5 -11   8   -3.58    9.05
   5 -11  -8    1.11    7.27
   5  11  -7    4.45   10.66
  -5  11   7    7.17    9.23
   5 -11  -7    2.64    7.20
  -5 -11   7    2.99    5.65
   5  11  -6   78.13   14.22
  -5  11   6   30.81   14.37
   5 -11  -6   95.62   18.28
  -5 -11   6   91.96   28.72
   5  11  -5   16.27   10.80
  -5  11   5    2.49   11.16
  -5 -11   5    1.24    6.29
   5 -11  -5   -4.57    7.85
   5  11  -4   47.60   16.29
  -5  11   4   52.43   14.04
  -5 -11   4   72.76   14.59
   5 -11  -4   59.75   29.69
   5  11  -3   25.82   11.76
  -5  11   3   30.85   11.18
  -5 -11   3   75.83   26.14
   5 -11  -3   85.15   13.97
   5  11  -2    8.21   10.85
  -5  11   2    9.63   11.25
  -5 -11   2    1.48    4.79
   5 -11  -2    2.87    4.97
   5  11  -1  127.50   15.86
  -5  11   1   98.03   15.98
  -5 -11   1  172.59   26.56
   5 -11  -1  149.59   25.92
   5  11   0   18.28   16.26
  -5  11   0   29.63   10.35
  -5 -11   0   43.03   15.07
   5 -11   0   20.65   16.37
   5  11   1  158.59   17.43
  -5  11  -1   95.27   15.63
  -5 -11  -1  218.24   18.53
   5 -11   1  168.40   26.20
   5  11   2   -1.70    9.20
  -5  11  -2   -3.53   11.51
  -5 -11  -2   -7.61   11.02
   5 -11   2   -6.85    9.77
   5  11   3  132.91   14.21
   5 -11   3  166.99   17.68
  -5 -11  -3  102.23   41.47
   5  11   4   32.81   16.11
  -5  11  -4   13.09   11.72
  -5 -11  -4   25.03   16.03
   5 -11   4   34.30   13.75
   5  11   5  109.97   14.43
  -5  11  -5   68.51   11.37
  -5 -11  -5  116.31   45.31
   5 -11   5  116.88   50.75
   5  11   6   43.25   15.12
  -5  11  -6   21.74   12.44
  -5 -11  -6    9.99    7.20
   5 -11   6   14.75    8.10
   5  11   7  112.87   13.86
  -5 -11  -7  147.15   10.48
   5 -11   7   98.46   41.37
   5 -11   7  126.36   11.32
   5  11   8   -0.56    8.84
  -5 -11  -8   -3.16    9.26
   5 -11   8    8.00    4.40
   5 -11   8    1.21    4.62
   5  11   9   12.18    8.61
  -5 -11  -9   39.84   17.70
   5 -11   9   29.93    7.79
   5 -11   9   41.48   10.73
   5  12 -11   17.01    8.55
   5 -12 -11    8.15    9.52
   5 -12 -11   21.65   11.97
  -5 -12  11   25.15    9.25
   5  12 -10    6.18    9.01
   5 -12 -10    5.29    6.82
   5 -12 -10   -4.98    8.75
  -5 -12  10    0.10    9.14
   5  12  -9   18.66   10.20
   5 -12  -9    7.61    4.28
   5 -12  -9    2.94    7.79
  -5 -12   9   -0.37   10.46
   5  12  -8    9.28   11.13
  -5  12   8    8.00   11.23
  -5 -12   8    9.12    8.66
   5 -12  -8   18.66   11.93
   5  12  -7   -0.50    9.93
  -5  12   7   -3.04   10.34
   5 -12  -7   -1.55    4.18
  -5 -12   7   -4.02    9.88
   5  12  -6   15.77    7.45
  -5  12   6   12.19    9.26
   5 -12  -6   45.70   11.88
  -5 -12   6   23.81    9.27
   5  12  -5    1.32    5.35
  -5  12   5    7.88    8.55
  -5 -12   5    2.42    5.89
   5 -12  -5   -9.35    7.84
   5  12  -4   17.91   12.44
  -5  12   4    3.71   12.58
  -5 -12   4   13.19    8.08
   5 -12  -4   20.62   11.50
   5  12  -3    9.79   10.21
  -5  12   3    7.79   11.59
  -5 -12   3   26.49   11.15
   5 -12  -3   14.36    8.76
   5  12  -2    4.01    8.83
  -5  12   2    1.54   10.82
  -5 -12   2   10.90   12.28
   5 -12  -2    9.30    8.67
   5  12  -1   63.13   16.80
  -5  12   1   22.05   13.47
  -5 -12   1   35.10   11.78
   5 -12  -1   49.80   29.54
   5  12   0   -1.49   10.11
  -5  12   0   12.73   13.24
  -5 -12   0    9.68    8.22
   5 -12   0    8.57    8.49
   5  12   1   56.33   14.28
  -5  12  -1   57.57   11.86
  -5 -12  -1   96.41   15.56
   5 -12   1   45.16   22.16
   5  12   2  -10.23   10.95
  -5  12  -2   34.60   15.16
  -5 -12  -2   21.99   12.37
   5 -12   2   24.81   10.52
   5  12   3   55.88   14.26
  -5  12  -3    8.25    9.96
  -5 -12  -3   17.28   12.66
   5 -12   3   34.77   10.23
   5  12   4   -1.92    7.93
  -5  12  -4  -11.59    9.20
  -5 -12  -4   12.88   11.21
   5 -12   4    8.15   12.60
   5  12   5   56.69   12.52
  -5  12  -5   27.67    9.80
  -5 -12  -5   46.14   27.58
   5 -12   5   58.81   11.49
   5  12   6   22.97   11.82
   5 -12   6   28.59   16.75
  -5 -12  -6   16.62   11.85
   5  13  -3    5.85   11.32
  -5  13   3   -5.48   11.14
  -5 -13   3    8.05    9.35
   5 -13  -3   -1.19    5.19
  -5  13   2   47.54   11.37
   5  13  -2   42.83   11.95
   5 -13  -2   40.69   25.92
  -5  13   1    3.35   10.57
   5  13  -1   14.32   10.97
   5 -13  -1    8.25    5.15
  -6   0  19    1.42    2.96
  -6   0  18  341.78   12.54
   6   0 -18  373.05   13.50
  -6   0  17    5.17    4.14
   6   0 -17    5.88    3.10
  -6   0  16   52.53    8.49
   6   0 -16   60.24    5.72
   6   0 -15    1.54    2.09
  -6   0  15   -0.80    3.26
   6   0 -15    9.40    4.70
   6   0 -14   13.61    2.34
  -6   0  14    8.02    3.96
   6   0 -14    8.27    5.55
   6   0 -13   -2.31    1.42
  -6   0  13    2.07    1.98
   6   0 -13   -7.00    5.84
   6   0 -12   91.54    5.18
  -6   0  12   77.83    2.61
   6   0 -12   71.09   18.15
   6   0 -11   -1.87    0.97
  -6   0  11   -0.95    1.08
   6   0 -11   -5.71    5.82
  -6   0  10  106.17    2.39
   6   0 -10  115.69    7.31
   6   0  -9    1.59    3.94
   6   0  -8 1310.51   36.65
  -6   0   7    1.45    2.61
   6   0  -7    5.15   12.02
  -6   0   6 2042.79   48.72
  -6   0   6 1877.31   45.05
  -6   0   6 1822.39   45.06
   6   0  -6 2060.91   59.93
  -6   0   5    1.53    0.89
   6   0  -5    0.94    2.22
  -6   0   5   -2.60    5.57
   6   0  -5   15.25   13.42
  -6   0   4 1065.85   27.59
   6   0  -4  938.02   23.76
  -6   0   4 1068.32   32.51
   6   0  -4 1171.48   30.72
  -6   0   3    1.40    1.99
   6   0  -3    9.51    5.99
  -6   0   3    4.13    4.73
   6   0  -3    5.02    2.87
  -6   0   2 2751.86   66.52
   6   0  -2 2575.79   64.32
  -6   0   2 2703.27   65.86
   6   0  -2 2957.54   72.51
  -6   0   1   -3.27    3.75
   6   0  -1    1.96    6.62
  -6   0   1   -4.24    6.40
   6   0  -1    6.06    5.62
  -6   0   0 3817.39   91.95
   6   0   0 3667.50   91.43
  -6   0   0 3925.69   94.73
   6   0   0 4015.17   97.53
  -6   0  -1    1.13    2.18
   6   0   1   -1.41    7.57
  -6   0  -1  -10.89    5.40
   6   0   1    5.20    7.55
   6   0   2  807.81   31.22
  -6   0  -2  830.05   31.87
   6   0   2  913.23   18.86
   6   0   3   -7.38    9.06
  -6   0  -3    2.73    2.85
   6   0   3    7.12    3.97
   6   0   4  499.03   20.87
  -6   0  -4  492.78   22.96
   6   0   4  506.13   17.97
   6   0   5   -4.02    8.98
  -6   0  -5    1.66    2.57
   6   0   5   -3.12    6.22
   6   0   6   58.60   20.77
  -6   0  -6   42.65    4.89
   6   0   6   48.05    6.85
   6   0   7    3.27    4.73
  -6   0  -7   -0.47    2.62
   6   0   7   -1.84    4.74
   6   0   8   61.37    9.99
  -6   0  -8   57.47    7.18
   6   0   8   81.38   11.47
   6   0   9   -9.49    9.68
  -6   0  -9    1.49    2.15
   6   0   9   -2.79    4.51
   6   0  10    9.63    9.31
  -6   0 -10    4.01    2.83
   6   0  10    1.23    3.97
   6   0  11   -2.87   10.65
   6   0  11    1.49    2.03
   6   0  12  375.67   22.02
   6   0  13   -9.54   12.23
   6   0  14  303.63   19.28
   6   0  15    6.96   12.88
   6   0  16   24.60   14.78
   6   0  17   12.26    7.13
   6   0  18   43.04   17.09
  -6  -1  20   48.38   18.45
  -6   1  19    2.06    1.73
  -6  -1  19   -3.51    3.93
  -6   1  18   70.25   14.34
   6   1 -18   96.55   18.49
  -6  -1  18   82.10   11.23
   6  -1 -18   97.66    6.09
  -6   1  17    2.32    4.26
   6   1 -17    6.68    3.59
  -6  -1  17    6.12    3.72
   6  -1 -17    3.42    4.34
  -6   1  16   99.54   11.44
   6   1 -16  138.47    7.11
  -6  -1  16  116.87    7.78
   6  -1 -16  114.74   13.53
   6   1 -15   42.40    5.70
  -6   1  15   53.83    8.53
   6   1 -15   47.81   19.19
  -6  -1  15   44.12    6.94
   6  -1 -15   45.26   15.42
   6  -1 -15   40.51    6.78
   6   1 -14   85.95    5.67
  -6   1  14   74.93    4.83
   6   1 -14   94.13   18.60
  -6  -1  14   85.30    4.38
   6  -1 -14   94.09    7.38
   6  -1 -14   83.38    7.73
   6   1 -13    1.00    1.02
  -6   1  13    0.15    0.95
   6   1 -13    1.04    3.05
  -6  -1  13    2.21    1.73
   6  -1 -13   -2.98    5.28
   6  -1 -13   -0.01    1.09
   6   1 -12   80.24    3.62
  -6   1  12   51.02    4.07
   6   1 -12   77.92   10.34
  -6  -1  12   72.35    4.56
   6  -1 -12   72.49   10.50
   6  -1 -12   76.75    3.45
   6   1 -11    5.87    6.37
   6   1 -11    2.83    1.67
   6  -1 -11    2.91    0.83
  -6  -1  11    5.95    3.64
   6  -1 -11    3.76    2.73
   6  -1 -11    2.19    1.04
   6   1 -10   32.12    5.81
   6   1 -10   24.10    7.53
   6  -1 -10   45.35   16.57
  -6  -1  10   40.86    3.20
   6   1  -9  738.33   38.22
  -6  -1   9  519.38   19.36
  -6  -1   9  781.26   28.90
   6   1  -8 1380.18   38.80
  -6  -1   8 1560.82   41.16
   6  -1  -8 1427.59   39.46
  -6  -1   8 1139.16   30.20
   6   1  -7  648.94   26.03
  -6  -1   7  689.24   26.39
   6  -1  -7  684.52   28.04
  -6  -1   7  522.69   19.59
   6   1  -6 2552.63   64.00
  -6  -1   6 2039.46   49.09
  -6  -1   6 2578.82   62.27
   6  -1  -6 2475.96   65.12
   6  -1  -6 1944.51   46.24
  -6   1   5   80.90    4.82
   6   1  -5   54.78   10.76
   6   1  -5  119.51   16.45
  -6   1   5   71.83    9.70
   6  -1  -5   74.60    4.87
  -6  -1   5   66.24    5.81
   6  -1  -5   98.31   10.27
  -6  -1   5   66.68    5.70
  -6   1   4 1722.51   42.11
   6   1  -4 1813.75   47.14
  -6   1   4 1628.68   41.55
   6   1  -4 1319.17   32.59
  -6  -1   4 1492.32   36.55
   6  -1  -4 1804.48   45.77
   6  -1  -4 1591.35   38.55
  -6   1   3  154.28    8.07
   6   1  -3  132.17   12.30
   6   1  -3  172.95   13.04
  -6   1   3  151.31   12.13
   6  -1  -3  152.10    8.49
  -6  -1   3  153.45   21.35
   6  -1  -3  168.21   14.04
  -6  -1   3  144.77    7.89
  -6   1   2  852.25   21.37
   6   1  -2  720.36   19.71
   6   1  -2  918.45   25.52
  -6   1   2  841.47   29.29
  -6  -1   2  784.87   20.12
  -6  -1   2  814.86   21.87
   6  -1  -2  901.90   25.12
   6  -1  -2  842.49   22.09
  -6   1   1   22.90    9.25
   6   1  -1   32.26    7.72
   6   1  -1   34.39   10.82
  -6   1   1   23.53   13.94
  -6  -1   1   27.26    4.85
  -6  -1   1   14.87    6.86
   6  -1  -1   21.15    7.63
   6  -1  -1   25.20   13.47
  -6   1   0 2182.45   53.18
   6   1   0 1944.39   48.28
   6   1   0 2358.29   58.76
  -6   1   0 2179.91   53.39
  -6  -1   0 2101.28   53.05
  -6  -1   0 2135.77   52.59
   6  -1   0 2309.68   56.99
   6  -1   0 2175.37   53.28
  -6   1  -1  631.42   26.56
   6   1   1  568.27   23.79
   6   1   1  673.09   27.33
  -6   1  -1  618.23   24.09
  -6  -1  -1  584.42   22.65
  -6  -1  -1  611.28   23.89
   6  -1   1  683.32   28.38
   6  -1   1  619.52   24.70
   6   1   2  499.06   20.26
   6   1   2  431.79   20.12
  -6   1  -2  457.00   18.50
   6  -1   2  509.11   21.64
  -6  -1  -2  460.79   18.56
   6  -1   2  471.25   30.11
   6   1   3  554.41   23.29
   6   1   3  469.87   22.05
  -6   1  -3  473.93   19.73
   6  -1   3  527.57   21.72
  -6  -1  -3  492.35   19.53
   6  -1   3  522.27   22.75
   6   1   4  197.20    9.64
   6   1   4  176.62   30.88
  -6   1  -4  172.83    8.79
   6  -1   4  201.88    7.76
  -6  -1  -4  181.92    6.44
   6  -1   4  180.43   10.75
   6   1   5    1.63    3.86
   6   1   5   -2.34    8.70
  -6   1  -5   -0.48    3.48
   6  -1   5    3.29    6.32
  -6  -1  -5   -0.01    1.91
   6  -1   5   -6.39    8.22
   6   1   6  100.52   12.20
   6   1   6   94.32   20.42
  -6   1  -6   86.45   11.89
  -6  -1  -6   98.92   12.20
   6  -1   6  107.25   10.35
   6  -1   6   98.84    8.79
   6   1   7  162.95    8.13
   6   1   7  146.47   15.44
  -6   1  -7  150.07   12.30
  -6  -1  -7  158.14    7.89
   6  -1   7  162.69   14.99
   6  -1   7  139.33   13.36
   6   1   8    2.60    3.20
   6   1   8   -7.03   10.37
   6  -1   8   -4.74    9.58
   6  -1   8   -1.83    5.09
  -6  -1  -8    1.11    1.34
   6  -1   8    1.44    3.07
   6   1   9   47.29    7.92
   6   1   9   62.98   16.18
   6  -1   9   53.02   14.25
   6  -1   9   45.76    6.14
  -6  -1  -9   35.08    4.81
   6  -1   9   25.00    3.31
   6   1  10   75.59   16.45
   6  -1  10   83.27    8.03
   6  -1  10   79.56   29.84
   6  -1  10   35.37    3.10
   6   1  11   39.42   22.66
   6   1  11   41.34    5.41
   6  -1  11   39.81   21.18
   6  -1  11   39.71    5.85
   6   1  12  338.70   40.89
   6  -1  12  377.54   19.78
   6  -1  12  368.01   12.51
   6   1  13   -2.48   12.23
   6  -1  13  -10.82   11.80
   6   1  14  277.71   48.11
   6  -1  14  294.01   48.80
   6   1  15   21.04   13.04
   6  -1  15    5.80    7.08
   6   1  16   27.70   12.39
   6  -1  16   30.50   12.15
   6   1  17    4.72   11.83
   6  -1  17   20.33   10.74
   6   1  18    9.39   13.11
   6  -1  18   16.76   11.61
  -6  -2  20   10.39    4.45
  -6   2  19    1.07    2.93
  -6  -2  19    2.29    4.39
  -6   2  18   94.42    5.67
   6   2 -18  127.29   10.98
  -6  -2  18  132.04   11.15
   6  -2 -18  118.89    7.65
  -6   2  17   24.56    4.26
   6   2 -17   39.83    5.51
  -6  -2  17   31.80    9.65
   6  -2 -17   36.43   11.42
  -6   2  16  557.83   24.71
   6   2 -16  764.67   33.00
  -6  -2  16  704.50   32.97
   6  -2 -16  677.76   29.27
  -6   2  15   15.63    4.05
   6   2 -15   14.51    8.44
  -6  -2  15    9.72    4.63
   6  -2 -15   17.80    7.39
   6  -2 -15   10.42    4.50
   6   2 -14  578.48   17.71
  -6   2  14  416.50   12.98
   6   2 -14  593.11   19.38
   6  -2 -14  552.33   17.03
   6  -2 -14  569.01   19.07
  -6  -2  14  581.13   18.29
   6   2 -13    4.07    2.62
  -6   2  13   -0.17    1.70
   6   2 -13    7.63    3.27
   6  -2 -13    1.58    1.56
   6  -2 -13    0.77    2.61
  -6  -2  13    7.76    4.75
   6   2 -12  132.84    9.40
   6   2 -12  105.06    4.05
  -6  -2  12  124.23    7.01
   6  -2 -12  113.02    4.97
   6  -2 -12  128.35    9.75
   6  -2 -12  127.83    8.30
   6   2 -11    3.31    6.04
   6   2 -11    0.05    1.46
  -6  -2  11    2.30    1.59
   6  -2 -11    0.99    0.65
   6  -2 -11    9.89    8.51
   6  -2 -11    1.06    1.02
   6   2 -10  221.86    4.44
   6   2 -10  210.01    9.43
  -6  -2  10  217.45   11.62
   6  -2 -10  205.63    8.48
   6  -2 -10  207.30    2.00
   6   2  -9  819.73   26.14
   6   2  -9  771.88   26.38
   6  -2  -9  749.46   25.20
  -6  -2   9  783.47   24.49
   6   2  -8 1261.25   35.38
  -6  -2   8 1216.58   33.34
   6  -2  -8 1189.52   35.22
  -6  -2   8  782.79   21.50
   6   2  -7 1027.24   29.40
   6  -2  -7  994.86   26.25
  -6  -2   7  719.36   19.98
   6  -2  -7  740.23   19.64
   6  -2  -7  999.72   29.65
  -6  -2   7 1086.08   29.51
   6   2  -6 1107.61   50.35
  -6   2   6 1132.75   29.97
   6  -2  -6 1057.03   28.45
  -6  -2   6  788.15   21.74
   6  -2  -6 1073.91   31.40
  -6  -2   6 1145.61   32.06
   6   2  -5  571.19   23.91
  -6   2   5  574.92   21.47
   6  -2  -5  545.40   22.12
  -6  -2   5  431.76   16.72
   6  -2  -5  574.67   24.17
  -6  -2   5  596.28   22.97
  -6   2   4  939.72   23.27
   6   2  -4  653.12   18.55
   6   2  -4  971.82   26.36
  -6  -2   4  733.60   19.23
   6  -2  -4  977.32   27.07
   6  -2  -4  944.86   24.34
  -6   2   3  386.22   17.61
   6   2  -3  286.37   15.34
   6   2  -3  407.92   20.74
  -6  -2   3  307.59   14.82
   6  -2  -3  354.74   19.38
   6  -2  -3  382.97   19.94
  -6   2   2  259.66   12.31
   6   2  -2  202.95   12.64
   6   2  -2  295.11   19.18
  -6  -2   2  218.43   11.55
   6  -2  -2  264.60   17.48
   6  -2  -2  256.36   13.91
  -6   2   1  430.88   17.03
   6   2  -1  356.53   15.93
   6   2  -1  415.27   18.07
  -6  -2   1  363.19   15.64
   6  -2  -1  457.44   20.21
   6  -2  -1  448.34   18.61
  -6   2   0   -0.43    4.36
   6   2   0   15.54    7.40
   6   2   0   -4.26    8.71
  -6  -2   0    9.24    5.09
   6  -2   0    3.99    6.84
   6  -2   0    3.70    5.52
   6   2   1  853.25   31.36
   6   2   1  994.51   13.50
   6  -2   1  995.12   31.50
   6   2   2  405.54   19.34
   6   2   2  520.30   22.29
   6  -2   2  511.00   22.85
   6  -2   2  450.61   21.10
   6   2   3  494.87   20.54
   6   2   3  598.82   25.25
   6  -2   3  568.56   21.72
   6  -2   3  497.01   18.85
   6   2   4  566.41   10.35
   6   2   4  705.63   25.20
   6  -2   4  693.06   24.59
   6  -2   4  632.54   10.15
   6   2   5  -10.33    8.50
   6   2   5   11.69    6.24
   6  -2   5   39.06   12.21
   6  -2   5    7.38    4.88
   6   2   6   10.18    6.14
   6   2   6    8.73    8.79
   6  -2   6   17.81    9.28
   6  -2   6   11.06    6.14
  -6  -2  -6   23.08    6.01
   6   2   7    4.40    4.42
   6   2   7   -7.12    9.29
   6  -2   7    1.88    9.54
   6  -2   7   -0.71    4.58
  -6  -2  -7    1.87    3.27
   6   2   8  112.04    9.69
   6   2   8   78.18   34.40
   6  -2   8  114.64   17.80
  -6  -2  -8  109.30    5.14
   6  -2   8  107.83   11.05
   6  -2   8   58.73    4.32
   6   2   9   80.31    6.93
   6   2   9   46.19   27.57
   6  -2   9  100.05   20.47
  -6  -2  -9   62.89    8.07
   6  -2   9   70.04   17.75
   6  -2   9   39.69    6.55
   6   2  10  555.05   39.53
   6   2  10  659.15   28.65
   6  -2  10  636.99   31.02
   6  -2  10  614.90   27.46
   6   2  11    5.74    6.45
   6   2  11    5.14    4.59
   6  -2  11   -0.09   10.42
   6  -2  11    3.22    2.47
   6   2  12  427.92   22.61
   6   2  12  421.49   13.68
   6  -2  12  439.46   18.29
   6  -2  12  433.22   14.49
   6   2  13   -8.15   12.27
   6  -2  13    4.02    7.72
   6   2  14  135.61   41.54
   6  -2  14  181.93   20.80
   6   2  15   16.59   12.92
   6  -2  15    9.18    5.19
   6   2  16   17.60   11.90
   6  -2  16   37.15   16.11
   6   2  17   25.99   12.32
   6  -2  17   12.60   10.06
   6   2  18   33.12   18.25
   6  -2  18   -3.32    8.95
  -6  -3  20    2.86    6.99
  -6  -3  19    4.83    2.39
  -6   3  18  188.43    6.83
   6   3 -18  249.11    8.58
  -6  -3  18  260.25   10.26
   6  -3 -18  266.02   10.18
  -6   3  17    0.57    1.58
   6   3 -17   -2.15    4.18
  -6  -3  17    2.85    2.97
   6  -3 -17   -1.49    4.20
  -6   3  16  681.08   29.26
   6   3 -16  922.63   39.58
  -6  -3  16  926.13   42.24
   6  -3 -16  937.62   40.41
   6   3 -15   -0.61    5.83
   6  -3 -15   -0.15    2.42
  -6  -3  15    4.82    6.03
   6   3 -14 1455.69   43.29
   6  -3 -14 1319.30   38.23
   6  -3 -14 1543.48   45.40
   6  -3 -14 1380.36   45.95
  -6  -3  14 1423.14   46.63
   6   3 -13   -0.30    5.78
  -6  -3  13    6.13    2.08
   6  -3 -13    8.20    2.67
   6  -3 -13    4.64    3.87
   6  -3 -13    4.77    1.72
   6   3 -12  192.23   11.26
   6   3 -12  173.26   11.90
  -6  -3  12  186.79    9.15
   6  -3 -12  166.27    5.27
   6  -3 -12  196.32   10.33
   6  -3 -12  201.21    8.59
   6   3 -11    9.24    3.14
   6   3 -11    5.56    3.42
  -6  -3  11    0.24    3.45
   6  -3 -11    7.03    4.51
   6  -3 -11    0.31    6.05
   6  -3 -11    3.79    1.60
   6   3 -10  123.92   11.75
   6   3 -10  118.06    8.91
  -6  -3  10  122.49    7.11
   6  -3 -10  120.27    5.72
   6  -3 -10  126.87   11.85
   6  -3 -10   92.08    4.33
   6   3  -9  124.94   10.26
   6   3  -9  134.24    9.82
   6  -3  -9  133.34    3.52
  -6  -3   9  146.18   17.28
   6  -3  -9  134.67    9.28
   6  -3  -9  105.34    3.91
   6   3  -8  491.36   18.91
   6  -3  -8  491.88   16.49
   6  -3  -8  340.70   11.46
  -6  -3   8  309.76   11.64
   6  -3  -8  479.94   19.49
  -6  -3   8  518.91   19.04
   6   3  -7  930.13   13.93
   6  -3  -7  875.63   32.35
  -6  -3   7  572.86   22.01
   6  -3  -7  565.00   21.20
   6  -3  -7  852.04   33.23
  -6  -3   7  904.39   34.21
  -6   3   6  992.69    9.11
   6   3  -6  919.97   35.64
   6  -3  -6  924.72    7.14
  -6  -3   6  994.24   11.14
   6  -3  -6  891.39   34.34
  -6  -3   6  637.00   24.43
   6   3  -5 1815.16   52.08
  -6   3   5 1772.82   46.95
   6  -3  -5 1750.35   49.56
  -6  -3   5 1264.28   34.64
   6  -3  -5 1774.72   48.97
  -6  -3   5 1843.03   49.46
   6   3  -4  242.92   28.72
  -6   3   4  210.18    7.61
   6  -3  -4  209.88    8.21
  -6  -3   4  166.24    7.69
   6  -3  -4  210.80   13.40
  -6  -3   4  227.94   14.26
  -6   3   3  138.98    5.81
   6   3  -3   94.82    8.69
   6   3  -3  138.41   13.39
  -6  -3   3  100.86    6.88
   6  -3  -3  106.37    8.13
   6  -3  -3  135.15    7.23
  -6   3   2    1.97    3.48
   6   3  -2   -1.53    6.00
   6   3  -2    8.50    9.77
  -6  -3   2    2.17    5.26
   6  -3  -2   -1.60    7.89
   6  -3  -2   -2.63    5.14
  -6   3   1  251.71    9.19
   6   3  -1  181.11   10.32
   6   3  -1  259.70   16.28
   6  -3  -1  255.64   10.85
   6  -3  -1  262.67   11.84
  -6   3   0   21.63    4.34
   6   3   0   -8.47    7.57
   6   3   0   24.11   11.55
   6  -3   0    7.98    9.45
   6  -3   0    3.56    7.42
   6   3   1  555.00   23.77
   6   3   1  769.94   30.92
   6  -3   1  745.38   29.08
   6  -3   1  758.23   32.57
   6   3   2  125.32   14.01
   6   3   2  185.06   11.88
   6  -3   2  164.51    8.92
   6  -3   2  179.02    9.62
   6   3   3   35.06   26.63
   6   3   3   53.86    7.02
   6  -3   3   56.23   10.78
   6  -3   3   58.46    7.85
   6   3   4  357.26   15.59
   6   3   4  480.81   20.16
   6  -3   4  462.17   17.43
   6  -3   4  489.79   22.77
   6   3   5   20.35   18.73
   6   3   5   24.26   16.30
   6  -3   5   30.63    7.62
   6  -3   5   22.25    7.95
   6   3   6   -1.72    9.44
   6   3   6   -0.36    3.51
   6  -3   6    0.78    7.86
   6  -3   6    4.61    4.80
   6   3   7  139.55   15.99
   6   3   7  144.86    7.68
   6  -3   7  150.38   15.40
   6  -3   7  164.85    9.78
   6   3   8  545.21   44.27
   6   3   8  700.30   31.22
   6  -3   8  709.57   31.38
   6  -3   8  689.87   23.87
   6   3   9   26.57   11.19
   6   3   9   53.83   11.98
   6  -3   9   39.90    9.92
   6  -3   9   50.67    7.59
   6   3  10  488.59   31.48
   6   3  10  579.68   25.70
   6  -3  10  644.73   31.54
   6  -3  10  562.73   29.91
   6   3  11   49.05   14.19
   6   3  11   42.06    8.69
   6  -3  11   38.63   16.63
   6  -3  11   30.76   10.44
   6   3  12  266.17   32.75
   6  -3  12  282.37   13.58
   6  -3  12  256.77   14.45
   6   3  13    3.46   12.70
   6  -3  13    5.73    7.58
   6   3  14   95.30   33.85
   6  -3  14  146.64   15.80
   6   3  15    3.20    6.90
   6  -3  15   -1.51   11.93
   6   3  16   77.75   24.22
   6  -3  16  100.53   23.66
   6   3  17   10.65   10.51
   6  -3  17   -5.01    9.89
   6   3  18   54.88   23.70
   6  -3  18   93.79   15.28
  -6  -4  21   18.97    8.20
  -6  -4  20   45.72    7.69
  -6  -4  19   67.54    9.62
   6   4 -18  360.24   18.73
   6  -4 -18  337.94   20.54
  -6  -4  18  397.47   12.07
   6   4 -17   21.28    7.26
   6  -4 -17   15.57    6.45
   6  -4 -17   13.39    9.28
  -6  -4  17   30.65    7.52
   6   4 -16  819.19   27.78
   6  -4 -16  943.94   27.76
   6  -4 -16  826.51   25.48
  -6  -4  16  868.01   30.26
   6   4 -15   15.53    9.93
   6  -4 -15    6.57    3.24
   6  -4 -15    7.32    4.97
  -6  -4  15   10.37    7.04
   6   4 -14  539.06   19.12
   6  -4 -14  560.18   17.38
   6  -4 -14  543.05   21.74
  -6  -4  14  526.23   17.99
   6   4 -13    3.68    3.79
  -6  -4  13    9.42    7.32
   6  -4 -13   -2.92    2.55
   6  -4 -13    6.51    5.50
   6  -4 -13   -1.44    2.25
   6   4 -12   97.80   10.56
  -6  -4  12   84.55    6.96
   6  -4 -12   98.96    4.97
   6  -4 -12   74.94   10.76
   6  -4 -12   64.41    5.35
   6   4 -11   40.61    8.90
  -6  -4  11   40.69   16.68
   6  -4 -11   49.02    7.65
   6  -4 -11   53.51   11.88
   6  -4 -11   32.21    9.28
   6   4 -10    6.98    8.00
  -6  -4  10    6.63    4.75
   6  -4 -10   -0.72    2.44
   6  -4 -10    2.58    3.46
   6  -4 -10   -0.04    1.60
   6   4  -9   22.58    7.79
   6  -4  -9    8.90    7.09
  -6  -4   9   11.69    5.09
   6  -4  -9   15.76    9.42
   6  -4  -9    5.34    2.20
   6   4  -8   22.57    8.22
  -6  -4   8   16.19    7.06
   6  -4  -8    8.56    6.08
   6  -4  -8   13.62    6.55
   6  -4  -8    6.09    2.29
   6   4  -7    4.32    7.76
  -6  -4   7    5.14    4.99
   6  -4  -7    8.19    8.69
   6  -4  -7   -0.87    3.14
   6   4  -6   -7.79    8.13
  -6   4   6   -0.84    2.93
  -6  -4   6    1.03    4.06
   6  -4  -6    1.46    4.68
   6  -4  -6    1.18    2.34
  -6   4   5  701.14    7.24
   6   4  -5  703.49   11.32
   6  -4  -5  702.86   24.93
   6  -4  -5  714.45   23.29
   6   4  -4  255.51   35.87
  -6   4   4  235.01   15.12
  -6  -4   4  264.95   12.88
   6  -4  -4  266.69   14.37
   6  -4  -4  239.81    9.89
  -6   4   3 1031.76   32.33
   6   4  -3 1126.01   37.41
  -6  -4   3 1179.54   43.62
   6  -4  -3 1065.02   33.38
  -6   4   2  495.64   17.45
   6   4  -2  340.18   13.07
   6   4  -2  531.34   19.96
   6  -4  -2  527.67   18.72
   6  -4  -2  518.74   25.02
   6   4  -1  359.53   15.27
   6   4  -1  543.58   19.90
   6  -4  -1  535.76   24.10
   6  -4  -1  554.92   21.52
   6   4   0   11.01    7.34
   6   4   0   31.44   11.04
   6  -4   0   31.25   11.07
   6  -4   0   34.13   14.80
   6   4   1   21.04    8.14
   6   4   1   37.97   14.44
   6  -4   1   40.60    8.74
   6  -4   1   38.23   15.83
   6   4   2    4.36    8.22
   6   4   2   -0.92    8.06
   6  -4   2    3.57    3.80
   6  -4   2    6.73    3.79
   6   4   3    7.57    8.82
   6   4   3   10.38    7.57
   6  -4   3   -0.20    7.46
   6  -4   3   -5.79    7.00
   6   4   4    3.38    8.91
   6   4   4    4.76    3.56
   6  -4   4    1.42    8.05
   6  -4   4    4.42    6.16
   6   4   5    4.91    7.32
   6   4   5   -0.90    6.76
   6  -4   5   -7.63    8.61
   6  -4   5    3.12    4.14
   6   4   6   41.81   17.84
   6   4   6   49.52   15.47
   6  -4   6   62.94   14.69
   6  -4   6   54.41   19.08
   6   4   7   11.78    9.78
   6   4   7    3.57    4.91
   6  -4   7   11.91    9.37
   6  -4   7    7.22    3.21
   6   4   8  287.39   14.15
   6   4   8  371.98   14.07
   6  -4   8  398.38   19.98
   6  -4   8  369.29   14.27
   6   4   9   30.31   13.83
   6   4   9   22.11    7.33
   6  -4   9   27.46   14.23
   6  -4   9   16.43    4.86
   6   4  10  519.69   21.56
   6   4  10  612.13   18.41
   6  -4  10  660.09   24.60
   6  -4  10  623.09   25.38
   6   4  11   42.47   12.41
   6   4  11   33.68   10.48
   6  -4  11   42.20   17.18
   6  -4  11   39.03    9.47
   6   4  12  198.47   18.25
   6  -4  12  198.29   41.63
   6  -4  12  210.20   10.89
   6   4  13   34.51   18.18
   6  -4  13   20.46   12.92
   6   4  14  128.56   24.84
   6  -4  14  161.23   29.50
   6   4  15   38.09   12.40
   6  -4  15   50.19   13.11
   6   4  16   66.82   16.52
   6   4  17   17.88   13.09
   6  -4  17   39.98   10.75
  -6  -5  20   42.87    9.31
  -6  -5  19   90.57    9.11
   6   5 -18  213.91    8.71
   6  -5 -18  212.51    9.25
  -6  -5  18  233.64   21.59
   6   5 -17  177.26    8.54
   6  -5 -17  184.86   10.29
  -6  -5  17  204.54   18.69
   6   5 -16  407.38   16.53
   6  -5 -16  461.68   21.10
   6  -5 -16  412.91   16.85
  -6  -5  16  405.14   19.21
   6   5 -15  135.99   10.20
   6  -5 -15  122.89    5.23
   6  -5 -15  103.48   21.18
  -6  -5  15  128.50    9.72
   6   5 -14  414.13   21.27
   6  -5 -14  441.04   19.69
   6  -5 -14  389.25   19.84
  -6  -5  14  374.42   18.23
   6   5 -13    3.88    4.94
   6  -5 -13   -3.47    2.76
   6  -5 -13    3.11    6.65
  -6  -5  13    2.04    5.43
   6   5 -12   27.57   22.39
  -6  -5  12   37.45    9.83
   6  -5 -12   34.91   10.01
   6  -5 -12   37.52   19.84
   6  -5 -12   21.23    3.70
   6   5 -11    3.72    5.09
  -6  -5  11    6.69    6.84
   6  -5 -11    3.61    2.05
   6  -5 -11    1.93    7.79
   6  -5 -11    3.43    2.90
   6   5 -10   28.24   14.32
   6  -5 -10   32.92    8.54
  -6  -5  10   31.65    8.47
   6  -5 -10   39.61   12.08
   6  -5 -10   21.47    3.92
   6   5  -9  182.92   12.68
   6  -5  -9  192.41    7.80
  -6  -5   9  174.98    9.35
   6  -5  -9  195.93   12.09
   6  -5  -9  121.35    5.47
   6   5  -8   -6.18    7.93
  -6  -5   8   -0.19    3.41
   6  -5  -8    0.13    2.19
   6  -5  -8    9.07    6.58
   6  -5  -8    2.01    2.77
   6   5  -7  137.65   13.22
  -6  -5   7  135.21   10.06
   6  -5  -7  124.44    9.12
   6  -5  -7  130.61    7.48
  -6   5   6  193.31    9.12
   6   5  -6  211.23   12.93
  -6  -5   6  211.89   13.40
   6  -5  -6  219.14   14.12
   6  -5  -6  214.52   10.38
  -6   5   5  157.98    7.96
   6   5  -5  175.94   31.05
  -6  -5   5  184.87   27.46
   6  -5  -5  171.05   13.08
   6  -5  -5  168.68   10.29
   6   5  -4  196.17   12.05
  -6  -5   4  219.63   24.76
   6  -5  -4  176.38   26.56
   6  -5  -4  168.82    9.80
   6   5  -3 1145.59   51.83
  -6  -5   3 1244.60   40.00
   6  -5  -3 1054.07   35.51
   6  -5  -3 1149.99   36.25
   6   5  -2   68.44   31.92
  -6  -5   2   61.67   22.46
   6  -5  -2   58.83   22.10
   6  -5  -2   57.86   18.19
   6   5  -1  357.35   25.95
  -6  -5   1  367.68   18.00
   6  -5  -1  333.46   18.44
   6  -5  -1  327.47   15.84
   6   5   0   11.28    7.86
   6   5   0   25.39    8.02
   6  -5   0   17.97    9.69
   6  -5   0   21.66    6.56
   6   5   1   39.19    8.88
   6   5   1   41.44   12.09
   6  -5   1   49.08   19.79
   6  -5   1   31.66   19.11
   6   5   2   65.36    9.65
   6   5   2   92.07    8.26
   6  -5   2  105.16   16.84
   6  -5   2   90.43   31.75
   6   5   3   -6.21    9.62
   6   5   3    2.87    4.41
   6  -5   3    8.76    7.57
   6  -5   3    2.08    4.05
   6   5   4   73.31   10.38
   6   5   4   97.10   31.39
   6  -5   4  100.11   32.06
   6  -5   4  107.71   27.13
   6   5   5   29.99    9.14
   6   5   5   26.31    6.74
   6  -5   5   35.42   15.77
   6  -5   5   34.58    7.81
   6   5   6   -1.79    9.53
   6   5   6    6.25    6.45
   6  -5   6    5.97    4.61
   6  -5   6    3.34    5.79
   6   5   7   66.50   13.22
   6   5   7   82.64    8.31
   6  -5   7  105.55   16.00
   6  -5   7   92.73    7.16
   6   5   8   35.86   10.44
   6   5   8   26.70   10.02
   6  -5   8   32.13   17.28
   6  -5   8   32.50    7.17
   6   5   9  199.09   12.84
   6   5   9  225.57    8.73
   6  -5   9  251.85   32.97
   6  -5   9  242.46   22.26
   6   5  10  259.88   19.80
   6   5  10  275.31   14.48
   6  -5  10  311.50   24.82
   6  -5  10  301.56   12.46
   6   5  11   70.80   18.31
   6   5  11   86.19    7.30
   6  -5  11  103.45   25.22
   6  -5  11   79.77    6.84
   6   5  12  342.46   20.02
   6  -5  12  436.01   47.25
   6  -5  12  398.09   11.09
   6   5  13   25.94   18.41
   6  -5  13   42.34   21.28
   6   5  14  181.27   43.85
   6  -5  14  219.51   60.22
   6   5  15   25.79    9.38
   6  -5  15   42.43   22.37
   6   5  16   24.94   18.67
   6  -5  16   45.72   12.60
   6   5  17   38.22   21.82
   6  -5  17   40.52   15.05
  -6  -6  21   25.17    9.24
  -6  -6  20   36.50   12.28
  -6  -6  19   56.18   18.73
   6   6 -18   55.92   10.88
   6  -6 -18   55.70   15.67
  -6  -6  18   67.07   15.28
   6   6 -17  212.47    9.43
   6  -6 -17  190.02   10.55
  -6  -6  17  204.58   10.06
   6   6 -16   59.75   26.22
   6  -6 -16   91.30   13.56
   6  -6 -16   69.18   23.83
  -6  -6  16   83.07    8.81
   6   6 -15  341.18   14.20
   6  -6 -15  380.05   10.61
   6  -6 -15  310.60   17.75
  -6  -6  15  350.34   12.58
   6   6 -14  245.85   12.70
   6  -6 -14  268.27   12.24
   6  -6 -14  230.23   16.86
  -6  -6  14  245.68    9.83
   6   6 -13  243.04   13.56
   6  -6 -13  268.31   11.81
   6  -6 -13  254.68   12.78
  -6  -6  13  238.04   17.59
   6   6 -12   82.17   13.62
   6  -6 -12  100.48   12.56
   6  -6 -12   82.75   29.53
  -6  -6  12  107.81    8.88
   6   6 -11    3.87    7.78
   6  -6 -11    7.98    4.94
   6  -6 -11   11.77   13.22
  -6  -6  11    1.76    5.64
   6   6 -10    4.54    9.70
  -6  -6  10   -1.83    6.70
   6  -6 -10    7.89    6.53
   6  -6 -10    4.66    4.71
   6   6  -9   14.74    7.70
  -6  -6   9    1.46    4.55
   6  -6  -9    4.01    5.64
   6  -6  -9    2.39    3.57
   6   6  -8   66.22   25.65
   6  -6  -8   76.62    6.15
   6  -6  -8   64.25   15.06
  -6  -6   8   67.08   20.22
   6   6  -7    0.47    9.32
  -6  -6   7    2.22    3.19
   6  -6  -7   -1.62    6.29
   6  -6  -7    5.67    4.10
   6   6  -6  345.87   16.72
  -6  -6   6  372.52   17.02
   6  -6  -6  340.96   31.10
   6  -6  -6  352.37   14.64
   6   6  -5   -0.98    9.44
  -6  -6   5   10.99    9.16
   6  -6  -5   12.95   11.55
   6  -6  -5    9.57    7.17
   6   6  -4  224.02   15.77
  -6  -6   4  212.75   18.26
   6  -6  -4  206.37   13.29
   6  -6  -4  209.44   10.22
   6   6  -3  202.58   23.55
  -6  -6   3  250.40   13.61
   6  -6  -3  203.77   13.04
   6  -6  -3  194.87   15.85
   6   6  -2   47.66   15.73
  -6  -6   2   47.22   12.41
   6  -6  -2   43.91   17.43
   6  -6  -2   44.40   16.28
   6   6  -1   22.30    9.97
  -6  -6   1   32.15    9.33
   6  -6  -1   30.32   18.18
   6  -6  -1   32.98    9.41
   6   6   0   15.46    8.68
  -6  -6   0   29.52   11.42
   6  -6   0   14.87   10.40
   6  -6   0   17.52   13.78
   6   6   1    8.74    9.41
   6   6   1    7.39    7.87
   6  -6   1   -2.03    5.82
   6  -6   1   -6.38    7.64
   6   6   2   12.04   12.55
   6   6   2   11.25    4.66
   6  -6   2   20.26   14.65
   6  -6   2   12.61    8.01
   6   6   3   42.96   10.41
   6   6   3   71.00   25.66
   6  -6   3   78.97   27.35
   6  -6   3   73.39   25.91
   6   6   4   15.43   10.54
   6   6   4    1.68    8.59
   6  -6   4   15.66   10.31
   6  -6   4    7.74    5.76
   6   6   5    3.49   10.38
   6   6   5    5.56    8.10
   6  -6   5    5.95    7.85
   6  -6   5    5.91    6.60
   6   6   6   -0.71   10.38
   6   6   6    7.47    6.79
   6  -6   6   -4.45    9.69
   6  -6   6    6.53    8.08
   6   6   7  149.98   14.59
   6   6   7  149.47    6.88
   6  -6   7  179.68   21.69
   6  -6   7  164.12   11.02
   6   6   8   14.10   10.56
   6   6   8   14.10    6.60
   6  -6   8    4.02    6.95
   6  -6   8   11.64    7.63
   6   6   9  383.33   20.77
   6   6   9  439.17   16.66
   6  -6   9  554.76   25.80
   6  -6   9  476.92   36.83
   6   6  10   32.63   12.08
   6   6  10   49.73    7.41
   6  -6  10   40.94   11.55
   6  -6  10   54.15   12.02
   6   6  11  172.16   36.76
   6   6  11  175.52    7.30
   6  -6  11  229.97   20.73
   6  -6  11  214.62    8.31
   6   6  12  185.40   14.19
   6  -6  12  249.05   14.11
   6  -6  12  239.91    8.22
   6   6  13   61.15    9.95
   6  -6  13  125.81   13.47
   6   6  14  132.79   14.66
   6  -6  14  122.63   50.04
   6   6  15   28.66   11.74
   6  -6  15   53.08   28.52
   6   6  16    2.95   12.38
   6  -6  16   20.11   12.10
  -6  -7  21   29.60    7.29
  -6  -7  20    9.77    8.23
  -6  -7  19   33.59   11.51
   6   7 -18   -2.30    5.75
  -6  -7  18   -2.78    6.55
   6   7 -17   55.65    6.31
   6  -7 -17   73.48    7.94
  -6  -7  17   57.39   15.94
   6   7 -16    7.85    4.94
   6  -7 -16    3.65    3.85
  -6  -7  16    3.47    4.44
   6   7 -15  125.89   27.90
   6  -7 -15  165.74    7.42
   6  -7 -15  160.12    9.14
  -6  -7  15  161.49   10.96
   6   7 -14   25.23    7.99
   6  -7 -14   20.24    9.04
   6  -7 -14   16.35    7.17
  -6  -7  14   34.67   10.90
   6   7 -13  331.46   16.92
   6  -7 -13  345.05   19.17
   6  -7 -13  332.35   15.92
  -6  -7  13  355.43   15.49
   6   7 -12   28.50   10.28
   6  -7 -12   33.49    5.62
   6  -7 -12   23.97    9.40
  -6  -7  12   43.58    9.79
   6   7 -11  113.90   18.23
   6  -7 -11  119.99    6.32
   6  -7 -11  115.36   11.14
  -6  -7  11  131.16   11.87
   6   7 -10    7.44    8.34
   6  -7 -10   19.38   11.81
   6  -7 -10   11.21    4.37
   6   7  -9    0.48    7.25
  -6  -7   9    4.72    7.64
   6  -7  -9    4.73   10.86
   6  -7  -9   -0.92    6.27
   6   7  -8  217.10   13.93
   6  -7  -8  240.68   10.21
   6  -7  -8  227.26   17.58
  -6  -7   8  253.87   15.05
   6   7  -7  128.02   31.72
   6  -7  -7  161.47    8.29
   6  -7  -7  145.89    9.61
  -6  -7   7  131.02   13.10
   6   7  -6  308.00   17.65
  -6  -7   6  295.70   13.19
   6  -7  -6  300.35   16.44
   6  -7  -6  285.29   19.87
   6   7  -5   36.87   14.71
  -6  -7   5   28.05   13.85
   6  -7  -5   51.75   18.24
   6  -7  -5   34.88   19.36
   6   7  -4   87.28    9.43
  -6  -7   4  101.82   13.29
   6  -7  -4   95.14   32.34
   6  -7  -4   86.09   18.87
   6   7  -3   -8.10    9.63
  -6  -7   3    4.12    3.24
   6  -7  -3    3.14    6.50
   6  -7  -3   -3.14    8.06
   6   7  -2   15.84   10.54
  -6  -7   2   21.68   12.09
   6  -7  -2   10.60    9.76
   6  -7  -2   17.08    7.93
   6   7  -1   32.61   11.61
  -6  -7   1   48.77   18.64
   6  -7  -1   43.15   18.58
   6  -7  -1   53.95   10.53
   6   7   0  271.14   14.61
  -6  -7   0  292.12   36.53
   6  -7   0  264.79   26.44
   6  -7   0  266.77   12.71
   6   7   1  117.99   28.98
  -6  -7  -1  149.86   42.47
   6  -7   1  122.37   20.26
   6  -7   1  143.83   14.88
   6   7   2  230.99   19.16
  -6  -7  -2  305.88   25.68
   6  -7   2  256.30   28.50
   6  -7   2  228.14   11.92
   6   7   3   14.24    9.83
   6  -7   3   21.72    9.83
   6  -7   3   26.27   13.09
   6   7   4   25.89   11.27
   6   7   4   10.56    7.38
   6  -7   4    9.10    7.26
   6  -7   4    8.98   10.73
   6   7   5   23.96   10.50
   6   7   5   41.26   11.31
   6  -7   5   50.76   12.51
   6  -7   5   43.34   12.99
   6   7   6    4.25   10.33
   6   7   6    1.34    5.34
   6  -7   6   -8.25   10.11
   6  -7   6    1.51    4.34
   6   7   7  145.79   15.23
   6   7   7  158.67   12.00
   6  -7   7  197.40   34.20
   6  -7   7  168.15   21.89
   6   7   8   22.08   15.33
   6   7   8    3.43    6.17
   6  -7   8    8.43    7.95
   6  -7   8    5.94    4.99
   6   7   9  232.37   11.67
   6   7   9  289.76   10.96
   6  -7   9  381.57   17.75
   6  -7   9  354.56   10.60
   6   7  10    2.30   11.33
   6   7  10    2.02    5.34
   6  -7  10   -2.63   11.52
   6  -7  10    2.29    4.39
   6   7  11  149.45   17.43
   6   7  11  160.48    8.83
   6  -7  11  244.65   18.17
   6  -7  11  215.81   10.19
   6   7  12   52.99   16.29
   6  -7  12   73.80   18.92
   6  -7  12   40.17   15.04
   6   7  13   88.15   14.31
   6  -7  13   81.94   32.81
   6   7  14    3.79   10.06
   6  -7  14   13.54   13.66
   6   7  15   24.55   11.71
   6  -7  15   23.63   13.79
  -6  -8  19   73.77    9.98
   6   8 -18    5.88    6.18
  -6  -8  18   -3.10    7.57
   6   8 -17   20.14    6.45
   6  -8 -17   24.07   10.80
  -6  -8  17   34.17   11.40
   6   8 -16   -2.75    6.21
   6  -8 -16    7.08    7.06
  -6  -8  16   -0.94    7.11
   6   8 -15   39.42    9.98
   6  -8 -15   50.61    7.72
   6  -8 -15   35.94   18.23
  -6  -8  15   54.03    9.37
   6   8 -14    8.24    8.24
   6  -8 -14    3.55    3.28
   6  -8 -14    7.39    5.52
  -6  -8  14   -2.71    6.79
   6   8 -13   38.25   19.43
   6  -8 -13   40.80   19.94
   6  -8 -13   50.95   17.90
  -6  -8  13   45.25   13.27
   6   8 -12    0.11    9.19
   6  -8 -12    4.96    4.22
   6  -8 -12    4.79    8.26
  -6  -8  12    8.32    5.72
   6   8 -11   18.65   11.72
   6  -8 -11   45.15    6.72
   6  -8 -11   12.05   11.04
  -6  -8  11   41.48   13.15
   6   8 -10  118.16   42.91
  -6  -8  10  133.18   35.68
   6  -8 -10  144.64   11.78
   6  -8 -10  150.39    9.61
   6   8  -9    7.22   12.16
  -6  -8   9   -3.89    8.52
   6  -8  -9   -2.09   10.42
   6  -8  -9    2.07    6.16
   6   8  -8  430.86   20.13
   6  -8  -8  497.39   17.48
   6  -8  -8  464.84   21.09
  -6  -8   8  502.63   19.43
   6   8  -7   34.47   13.92
   6  -8  -7   66.48   21.57
   6  -8  -7   55.11   19.25
  -6  -8   7   79.35   12.28
   6   8  -6   76.26   10.97
  -6  -8   6  125.14   39.94
   6  -8  -6  116.24   10.55
   6  -8  -6   94.58   15.48
   6   8  -5   53.30   15.62
  -6  -8   5   47.37   12.97
   6  -8  -5   23.51   13.94
   6  -8  -5   37.12   14.02
   6   8  -4   -0.60   10.18
  -6  -8   4   11.34    6.61
   6  -8  -4    1.37    5.88
   6  -8  -4    7.85    4.67
   6   8  -3  136.29   21.14
  -6  -8   3  168.40   18.66
   6  -8  -3  144.33    9.84
   6  -8  -3  155.41   33.41
   6   8  -2   13.86   11.07
  -6  -8   2   -3.54    9.38
   6  -8  -2   13.27    9.78
   6  -8  -2   18.71    9.26
   6   8  -1  307.50   22.02
  -6  -8   1  380.11   22.71
   6  -8  -1  361.96   22.75
   6  -8  -1  368.43   20.69
   6   8   0   92.43   27.10
  -6  -8   0  106.95   33.40
   6  -8   0   88.23   31.09
   6  -8   0  111.08   13.06
   6   8   1  271.08   31.49
  -6  -8  -1  319.67   16.39
   6  -8   1  276.32   14.78
   6  -8   1  311.08   18.73
   6   8   2  179.86   10.47
  -6  -8  -2  202.20   10.38
   6  -8   2  197.95   11.65
   6  -8   2  199.01   12.06
   6   8   3   -5.10    9.65
  -6  -8  -3    3.98    8.60
   6  -8   3   -8.97    8.88
   6  -8   3   -1.38   11.49
   6   8   4  165.17   13.22
  -6  -8  -4  204.23   51.23
   6  -8   4  188.37   14.26
   6  -8   4  157.90   12.44
   6   8   5   66.93   25.83
  -6  -8  -5   68.42   30.38
   6  -8   5   73.54   22.01
   6  -8   5   58.32   27.49
   6   8   6   -8.77   10.67
   6   8   6   -2.73    7.59
   6  -8   6   -8.09   10.21
   6  -8   6    8.03    6.28
   6   8   7   33.08    9.59
   6   8   7   19.23   12.94
   6  -8   7   46.09   10.62
   6   8   8   -7.34   10.23
   6   8   8   -2.53    6.91
   6  -8   8    4.29    8.82
   6  -8   8    6.60    3.63
   6   8   9   48.79   13.42
   6   8   9   65.98    9.12
   6  -8   9   73.42   21.82
   6  -8   9   56.23   15.80
   6   8  10    3.46   11.49
   6   8  10    6.05    5.90
   6  -8  10    5.44    5.27
   6  -8  10    1.66    3.73
   6   8  11   58.30   11.11
   6   8  11   69.67   10.00
   6  -8  11  122.54   27.62
   6  -8  11   79.67   13.40
   6   8  12    9.76    9.98
   6  -8  12   12.69   11.36
   6  -8  12   11.42    7.04
   6   8  13   23.80   10.25
   6  -8  13   53.03   23.91
   6   8  14   10.64   10.98
   6  -8  14   -2.05   11.14
   6   9 -18   -3.08    4.76
  -6  -9  18    2.98    6.11
   6   9 -17   20.55    6.29
   6  -9 -17   18.26    7.01
  -6  -9  17   11.91    8.72
   6   9 -16    3.40    8.05
   6  -9 -16   -1.21    5.92
  -6  -9  16   -3.08    8.34
   6   9 -15    0.00    7.68
   6  -9 -15    5.39    7.33
  -6  -9  15    1.01    7.27
   6   9 -14    7.93    5.28
   6  -9 -14   -0.49    4.20
   6  -9 -14   -2.21    6.72
  -6  -9  14    6.25    5.09
   6   9 -13  -10.35    8.36
   6  -9 -13    3.95    1.93
   6  -9 -13    1.32    5.59
  -6  -9  13   -6.92    8.57
   6   9 -12    4.31    9.68
   6  -9 -12    1.05    5.13
   6  -9 -12    1.82    3.53
  -6  -9  12    2.61    4.34
   6   9 -11   13.78    9.71
   6  -9 -11    7.09    5.20
   6  -9 -11    1.89   11.98
  -6  -9  11   -3.03    8.87
   6   9 -10   14.10   11.57
  -6  -9  10   28.61    6.42
   6  -9 -10   38.94   12.91
   6  -9 -10   28.61   10.95
   6   9  -9    9.04    8.82
  -6  -9   9   10.92    9.35
   6  -9  -9    9.22    6.50
   6  -9  -9    7.69    6.13
   6   9  -8  118.62   53.61
   6  -9  -8  152.77   10.58
   6  -9  -8  154.47   14.58
  -6  -9   8  160.48   38.10
   6   9  -7   82.14   29.25
   6  -9  -7   84.70   36.26
   6  -9  -7   83.71   24.04
  -6  -9   7   81.00   25.55
   6   9  -6  119.95   41.30
  -6  -9   6  181.75    9.75
   6  -9  -6  213.31   19.93
   6  -9  -6  184.31   11.49
   6   9  -5  141.04   47.29
  -6  -9   5  230.08   37.37
   6  -9  -5  194.15   27.94
   6  -9  -5  228.48   12.41
   6   9  -4   16.63   13.15
  -6  -9   4   32.52    9.33
   6  -9  -4   32.34   13.44
   6  -9  -4   26.52    8.55
   6   9  -3  346.78   26.29
  -6  -9   3  447.68   20.94
   6  -9  -3  351.78   47.26
   6  -9  -3  392.47   19.14
   6   9  -2   -6.84   10.03
  -6  -9   2    7.57   10.59
   6  -9  -2    2.85    8.14
   6  -9  -2    3.48    6.68
   6   9  -1  440.93   19.52
  -6  -9   1  604.84   29.34
   6  -9  -1  547.22   22.81
   6  -9  -1  537.93   22.81
   6   9   0   31.74   10.47
  -6  -9   0   50.35   12.53
   6  -9   0   34.83   22.18
   6  -9   0   53.04   17.82
   6   9   1  162.42   48.35
  -6  -9  -1  251.50   21.41
   6  -9   1  233.94   17.52
   6  -9   1  246.18   15.54
   6   9   2   60.18   13.04
   6  -9   2   54.96   18.92
   6  -9   2   80.09   14.49
   6   9   3    6.36   10.83
  -6  -9  -3    4.39    8.24
   6  -9   3   -3.27    9.29
   6  -9   3   -0.94    8.12
   6   9   4  142.38   16.68
  -6  -9  -4  174.83   14.74
   6  -9   4  195.15   27.56
   6  -9   4  129.64   43.34
   6   9   5   18.92    8.74
  -6  -9  -5    3.89   10.00
   6  -9   5    4.82    5.91
   6  -9   5   -1.67   11.07
   6   9   6   40.88    8.46
  -6  -9  -6   57.60   19.17
   6  -9   6   31.42   13.19
   6  -9   6   36.64   13.39
   6   9   7   -2.27    6.99
  -6  -9  -7    8.08    7.36
   6  -9   7    5.23    6.31
   6  -9   7   14.33   10.38
   6   9   8    2.47    7.02
  -6  -9  -8   13.68   11.08
   6  -9   8   -2.21    6.83
   6  -9   8   -5.02    9.55
   6   9   9   -3.30    6.54
  -6  -9  -9    3.25    7.18
   6  -9   9   10.90    5.84
   6  -9   9  -13.32    9.87
   6   9  10   -0.84   11.25
   6   9  10   -7.83    6.90
   6  -9  10   12.64    7.64
   6  -9  10    0.42    7.39
   6   9  11    6.83    9.51
   6   9  11   23.48    9.48
   6  -9  11   37.00   10.82
   6  -9  11   16.26   12.37
   6   9  12   -2.55   10.04
   6  -9  12    5.31    7.51
   6  10 -16   10.46    8.47
   6 -10 -16    3.19    1.67
  -6 -10  16    4.49    5.37
   6  10 -15    1.95    7.75
   6 -10 -15    3.83    4.45
  -6 -10  15    0.37    8.72
   6  10 -14    8.41    8.08
   6 -10 -14    9.35    6.17
  -6 -10  14    8.86   11.28
   6  10 -13    7.01    7.92
   6 -10 -13    0.97    3.63
   6 -10 -13    2.11    3.00
  -6 -10  13   -0.16    9.57
   6  10 -12    0.23    9.07
   6 -10 -12   21.49    7.72
   6 -10 -12   10.68    6.75
  -6 -10  12   -0.98    7.32
   6  10 -11   -2.72    8.84
   6 -10 -11    1.05    4.53
   6 -10 -11    6.63    9.17
  -6 -10  11   -2.21    9.29
   6  10 -10    8.71    9.60
  -6 -10  10    1.64    8.92
   6 -10 -10    2.21    6.92
   6 -10 -10    2.38    2.38
   6  10  -9    7.93   10.91
  -6 -10   9   27.12   13.12
   6 -10  -9    6.84    5.91
   6 -10  -9   16.96    5.91
   6  10  -8   23.60   10.99
   6 -10  -8   -3.40    6.77
   6 -10  -8  -15.62   10.68
  -6 -10   8   -0.48    6.59
   6  10  -7   90.74   11.78
   6 -10  -7  103.41   14.28
   6 -10  -7   92.18   33.31
  -6 -10   7   85.84   35.72
   6  10  -6   -5.40   10.66
  -6 -10   6    1.18    9.03
   6 -10  -6    5.46    9.54
   6 -10  -6    2.52    6.56
   6  10  -5  258.08   13.72
  -6 -10   5  357.58   14.26
   6 -10  -5  321.72   39.68
   6 -10  -5  342.95   13.65
   6  10  -4   49.48   12.39
  -6 -10   4   52.61   19.15
   6 -10  -4   42.52   18.13
   6 -10  -4   52.92   21.36
   6  10  -3  318.42   17.46
  -6 -10   3  390.40   17.48
   6 -10  -3  400.05   17.80
   6 -10  -3  367.02   40.91
   6  10  -2   13.26   11.06
   6 -10  -2    0.69    6.69
  -6 -10   2   19.45   13.96
   6  10  -1  315.46   17.60
   6 -10  -1  320.69   11.71
  -6 -10   1  356.93   18.32
   6  10   0    0.51    8.96
  -6 -10   0    1.62    6.93
   6 -10   0   -1.60   11.14
   6 -10   0    4.37   11.33
   6  10   1  112.03   17.23
  -6 -10  -1  177.69   19.37
   6 -10   1   90.13   33.68
   6 -10   1  140.59   14.00
   6  10   2  -14.09    9.37
  -6 -10  -2    2.93    8.68
   6 -10   2    2.75    4.92
   6 -10   2   -1.87    6.82
   6  10   3   15.40   10.62
  -6 -10  -3   21.49   13.21
   6 -10   3   16.82   11.11
   6 -10   3   23.66   11.97
   6  10   4   36.66   13.49
  -6 -10  -4   19.44   11.39
   6 -10   4   36.81   14.81
   6 -10   4   11.49   11.86
   6  10   5   -7.69    9.76
  -6 -10  -5    4.69    9.26
   6 -10   5   -2.13    8.78
   6 -10   5   -1.43   11.63
   6  10   6   32.50   12.62
  -6 -10  -6   31.94   12.50
   6 -10   6   44.32   13.44
   6 -10   6   15.68    8.62
   6  10   7   -0.81    3.66
  -6 -10  -7   -8.74    9.10
   6 -10   7   -1.09    4.17
   6 -10   7    6.62    9.61
   6  10   8    7.90    8.02
  -6 -10  -8   -1.87    8.91
   6 -10   8    3.38    6.23
   6 -10   8    9.46    7.94
   6  10   9    8.89    7.71
  -6 -10  -9    4.70    9.96
   6 -10   9   10.21    7.15
   6 -10   9   -9.17    9.39
   6  10  10   -7.82    6.02
  -6 -10 -10   -6.39   10.09
   6 -10  10    1.16    4.42
   6 -10  10    0.90    6.48
   6  11 -14    5.31    7.71
  -6 -11  14    0.73    7.46
   6  11 -13    9.34    9.74
   6 -11 -13    1.64    4.37
  -6 -11  13    2.56    5.38
   6  11 -12    9.93   10.19
   6 -11 -12    7.79    5.23
   6 -11 -12    0.59    6.36
  -6 -11  12   -3.12    8.69
   6  11 -11   19.70   12.61
   6 -11 -11    8.09    6.03
   6 -11 -11    5.21    5.22
  -6 -11  11    9.28    6.00
   6  11 -10    8.01   12.61
   6 -11 -10    2.43    6.20
   6 -11 -10   -6.91    7.73
  -6 -11  10   -1.49    8.50
   6  11  -9   34.80   10.84
  -6 -11   9   32.30   13.63
   6 -11  -9   32.96   16.75
   6 -11  -9   47.18    9.85
   6  11  -8   15.52   11.38
   6 -11  -8   39.99   15.47
   6 -11  -8   38.35   16.77
  -6 -11   8   39.83   15.50
   6  11  -7   64.53   15.50
  -6 -11   7   88.75   17.08
   6 -11  -7   65.51   24.06
   6 -11  -7   70.24   20.51
   6  11  -6   -9.17    9.78
  -6 -11   6    9.88    9.23
   6 -11  -6   11.96    6.30
   6 -11  -6   -1.67    7.18
   6  11  -5  203.57   17.43
  -6 -11   5  196.85   15.78
   6 -11  -5  198.06   35.65
   6 -11  -5  190.34   11.49
   6  11  -4   20.05   12.16
  -6 -11   4    2.48    6.05
   6 -11  -4    2.15    7.59
   6 -11  -4   16.73    7.62
   6  11  -3  200.19   13.62
   6 -11  -3  227.24   29.77
  -6 -11   3  266.09   33.29
   6  11  -2   15.33   11.66
   6 -11  -2    0.97    5.33
  -6 -11   2  -15.09   10.93
   6  11  -1  131.05   16.34
   6 -11  -1  135.76   21.41
  -6 -11   1  185.60   17.31
   6  11   0   48.99   16.07
   6 -11   0   12.97    9.50
  -6 -11   0   51.58   13.41
   6  11   1   67.92   15.31
  -6 -11  -1   65.02   27.20
   6 -11   1   55.59   23.01
   6 -11   1   62.55   11.41
   6  11   2   33.83   10.31
   6 -11   2   49.58    8.64
  -6 -11  -2   55.16   16.03
   6  11   3   56.35   14.17
   6 -11   3   43.64   16.56
  -6 -11  -3   59.57   19.37
   6  11   4    4.00    8.89
  -6 -11  -4    9.77   10.39
   6 -11   4   11.85    6.30
   6 -11   4    0.92    4.81
   6  11   5   28.12   10.37
  -6 -11  -5   14.78   11.72
   6 -11   5   13.82    9.51
   6 -11   5   15.95   10.77
   6  11   6   10.71    9.09
  -6 -11  -6   13.58    7.22
   6 -11   6   -8.87    8.97
   6 -11   6    7.17   11.07
   6  11   7   -9.87    9.02
  -6 -11  -7    5.86    5.76
   6 -11   7   12.60    6.30
   6 -11   7  -10.27   10.73
   6  11   8    4.57    7.32
  -6 -11  -8    3.33    6.33
   6 -11   8   -1.88    7.24
   6 -11   8   -5.69   10.97
   6  12 -10   -1.65    9.99
   6 -12 -10   -1.63    5.54
   6 -12 -10   -0.58    8.78
  -6 -12  10    3.29    6.67
   6  12  -9    7.17    9.71
  -6 -12   9   10.94    9.95
   6 -12  -9   11.29    8.01
   6 -12  -9    4.25    5.96
   6  12  -8   22.37   15.17
  -6 -12   8   16.91    9.94
   6 -12  -8    5.27    6.16
   6 -12  -8    8.73    7.27
   6  12  -7   36.48   10.64
  -6 -12   7   38.08   15.28
   6 -12  -7   25.34   12.56
   6 -12  -7   21.55    8.24
   6  12  -6    3.97    9.74
  -6 -12   6   18.27   13.99
   6 -12  -6   18.76   10.99
   6 -12  -6   18.54    8.23
   6  12  -5   72.54   14.80
  -6 -12   5   67.98   32.62
   6 -12  -5   64.06   32.55
   6 -12  -5   51.24   26.34
   6  12  -4    6.35   11.54
  -6 -12   4   12.31    9.15
   6 -12  -4   34.55    9.05
   6 -12  -4   15.44   10.14
   6  12  -3   76.07   17.69
  -6 -12   3   64.12   13.66
   6 -12  -3   63.37   33.16
   6 -12  -3   63.22   23.83
   6  12  -2    7.78   13.08
  -6 -12   2   17.44    9.96
   6 -12  -2   13.80   12.20
   6 -12  -2    9.19    9.02
   6  12  -1   25.10   10.71
  -6 -12   1   77.50   27.20
   6 -12  -1   55.78   20.37
   6 -12  -1   50.65   12.42
   6  12   0   32.69   13.96
  -6 -12   0   27.53   12.61
   6 -12   0   18.56   15.48
   6 -12   0   18.82   17.29
   6  12   1   31.70   14.70
   6 -12   1   31.95   16.22
  -6 -12  -1   49.69   29.46
   6  12   2    2.39   10.81
  -6 -12  -2   15.46   12.60
   6 -12   2    8.56    5.81
   6 -12   2    8.46    7.36
   6  12   3   22.51    8.90
  -6 -12  -3   64.97   16.92
   6 -12   3   38.96   16.71
   6 -12   3   42.96   15.75
   6  12   4    8.82    8.15
  -6 -12  -4   10.88   10.53
   6 -12   4    4.78    7.96
   6 -12   4    4.80    5.07
   7   0 -19   -2.29    3.80
  -7   0  18   53.24   10.37
   7   0 -18   72.23   16.26
  -7   0  17   -2.82    2.37
   7   0 -17    4.19    5.29
  -7   0  16   44.56    8.61
   7   0 -16   57.94   21.31
   7   0 -15    0.56    1.29
  -7   0  15   -0.09    1.50
   7   0 -15   11.28    7.48
   7   0 -14   45.05    3.04
  -7   0  14   34.24    5.42
   7   0 -14   46.51   20.15
  -7   0  13    1.49    1.19
   7   0 -13    2.99    8.38
   7   0 -12  520.30   17.56
   7   0 -11    2.99    7.32
   7   0 -10 1973.43   61.54
   7   0  -9  -17.00    8.38
   7   0  -8 2360.14   63.86
  -7   0   7    0.18    0.56
  -7   0   7    0.30    0.77
   7   0  -7    3.63    7.38
  -7   0   6 2701.07   70.84
   7   0  -6 1969.92   51.82
   7   0  -6 2948.65   79.50
  -7   0   5   -1.76    2.21
   7   0  -5   -1.38    3.05
   7   0  -5   -0.80   10.13
  -7   0   4 1447.96   38.60
   7   0  -4 1285.29   34.99
   7   0  -4 1559.34   44.32
  -7   0   3   -3.83    3.29
   7   0  -3    2.06    5.31
   7   0  -3   -0.82    6.48
  -7   0   2 2473.20   65.94
   7   0  -2 2289.80   61.06
   7   0  -2 2727.72   73.50
  -7   0   1   -4.51    4.34
   7   0  -1   -4.86    6.47
   7   0  -1    5.01    6.45
  -7   0   0   82.28    6.23
   7   0   0   67.75    9.44
   7   0   0   83.74    8.40
   7   0   1   -0.76    6.65
   7   0   1   -1.45    5.54
   7   0   2 2149.57   66.38
   7   0   2 2400.57   73.90
   7   0   3   -6.12    7.68
   7   0   3    1.18    5.73
   7   0   4  355.96   13.63
   7   0   4  366.15   16.17
   7   0   5    6.65    5.71
   7   0   5    9.48    6.50
   7   0   6   16.99   11.23
   7   0   6   14.40    5.73
   7   0   7    5.81    7.23
   7   0   7   -0.68    3.81
   7   0   8    6.84    7.39
   7   0   8   20.18    8.48
   7   0   9    0.56    5.79
   7   0   9   -4.74    5.65
   7   0  10   50.96   10.48
   7   0  10   47.91    7.94
   7   0  11   14.81   11.42
   7   0  11   -2.32    3.32
   7   0  12   73.09   13.43
   7   0  13   -0.55   10.72
   7   0  14   -0.11   11.77
   7   0  15  -15.28   12.74
   7   0  16   36.68   20.54
   7   0  17   -2.02   10.93
   7   1 -19   15.56    8.10
   7   1 -18   36.30   11.18
   7  -1 -18   27.84   14.94
  -7  -1  18   42.13    4.26
  -7   1  17    4.55    3.26
   7   1 -17    5.13    2.44
  -7  -1  17    3.06    1.75
   7  -1 -17   -5.10    5.28
  -7   1  16   37.73    3.17
   7   1 -16   44.65   14.43
  -7  -1  16   37.43   12.38
   7  -1 -16   28.58   12.63
   7   1 -15    1.05    1.33
  -7   1  15    0.31    1.08
   7   1 -15    2.75    3.78
  -7  -1  15    3.72    4.53
   7  -1 -15    6.27    7.51
   7  -1 -15    0.20    1.01
   7   1 -14   93.83    5.38
   7   1 -14   92.52   16.95
   7  -1 -14   83.90    1.74
   7  -1 -14   85.02   23.43
  -7  -1  14   85.02    4.39
   7   1 -13   21.49    7.08
   7   1 -13   20.58   11.05
   7  -1 -13   38.11   16.00
  -7  -1  13   23.89    6.72
   7   1 -12  374.62   15.94
   7   1 -12  346.95   17.84
  -7  -1  12  347.76   14.39
   7  -1 -12  357.75   17.36
   7   1 -11  993.98   36.67
  -7  -1  11  672.84   17.74
  -7  -1  11  972.19   25.79
   7  -1 -11  962.51   27.85
   7   1 -10 1156.36   37.92
  -7  -1  10  859.37   26.18
  -7  -1  10 1167.18   35.57
   7  -1 -10 1169.41   37.73
   7   1  -9  513.90   20.12
  -7  -1   9  508.29   17.18
   7  -1  -9  510.93   18.71
  -7  -1   9  395.38   12.97
   7   1  -8 1229.60   42.15
  -7  -1   8 1263.34   38.30
   7  -1  -8 1224.07   43.77
  -7  -1   8 1008.97   30.82
   7   1  -7  137.20   13.72
  -7  -1   7  137.66    6.09
   7  -1  -7  122.73   12.79
  -7  -1   7   92.68    3.68
   7   1  -6 1702.64   48.30
  -7   1   6 1656.40   43.52
  -7  -1   6 1416.61   37.63
   7  -1  -6 1345.25   35.67
   7  -1  -6 1624.47   44.83
  -7  -1   6 1811.49   48.79
  -7   1   5  302.52    8.82
   7   1  -5  214.19    8.65
   7   1  -5  306.41   14.71
  -7  -1   5  265.46   13.00
   7  -1  -5  303.48   16.21
   7  -1  -5  256.34   11.14
  -7   1   4 2358.48   62.16
   7   1  -4 1854.04   49.65
   7   1  -4 2479.97   67.42
  -7  -1   4 2115.52   56.02
   7  -1  -4 2468.68   67.09
   7  -1  -4 2156.96   57.07
  -7   1   3  292.12    9.88
   7   1  -3  235.67   17.24
   7   1  -3  287.95   39.05
  -7  -1   3  261.77    8.79
   7  -1  -3  295.69   21.86
   7  -1  -3  262.76   10.70
  -7   1   2 1451.83   39.37
   7   1  -2 1240.61   39.11
   7   1  -2 1528.52   43.49
  -7  -1   2 1338.65   36.37
   7  -1  -2 1478.14   41.80
   7  -1  -2 1420.72   38.65
  -7   1   1 1289.76   35.12
   7   1  -1 1168.91   33.45
   7   1  -1 1369.35   39.14
  -7  -1   1 1237.52   34.01
   7  -1  -1 1329.15   36.93
   7  -1  -1 1260.25   34.75
  -7   1   0  148.04    6.98
   7   1   0  118.85   20.79
   7   1   0  158.17   13.18
   7  -1   0  147.65    9.82
   7  -1   0  141.41   10.48
   7   1   1  119.82    9.90
   7   1   1  145.08   12.81
   7  -1   1  143.80    9.29
   7  -1   1  134.97    8.46
   7   1   2  693.25   24.06
   7   1   2  813.90   27.72
   7  -1   2  778.57   25.96
   7  -1   2  831.29   27.86
   7   1   3    2.01    8.25
   7   1   3    5.27    8.19
   7  -1   3   14.83   10.28
   7  -1   3   13.36    9.80
   7   1   4  632.21   19.97
   7   1   4  569.36   20.82
   7  -1   4  579.60   18.46
   7  -1   4  641.86   28.77
   7   1   5   75.40   20.70
   7   1   5   59.24    9.72
   7  -1   5   76.60   22.83
   7  -1   5   62.42    6.80
   7   1   6   25.64   10.70
   7   1   6   13.53    7.75
   7  -1   6   18.72   10.17
   7  -1   6   15.07    7.07
   7   1   7    8.83   10.06
   7   1   7    2.17    4.00
   7  -1   7   -2.24   11.05
   7  -1   7    0.63    4.70
   7   1   8   10.67    9.99
   7   1   8   17.83    8.67
   7  -1   8   10.95   11.05
   7  -1   8   19.67    8.64
   7   1   9   25.79   13.51
   7   1   9   34.48   14.98
   7  -1   9   31.22   17.53
   7  -1   9   25.61   16.59
   7   1  10  149.15   10.95
   7   1  10  179.10    6.51
   7  -1  10  194.72   15.33
   7  -1  10  189.03    7.66
   7   1  11   -8.34   11.82
   7   1  11   -1.27    3.08
   7  -1  11   -1.21   11.37
   7  -1  11   -2.18    3.08
   7   1  12   -7.29   11.77
   7  -1  12  -10.97   11.82
   7   1  13   21.32   16.14
   7  -1  13    9.21   11.95
   7   1  14   -1.09   11.21
   7  -1  14   -2.32   12.30
   7   1  15   39.82   17.82
   7  -1  15   38.38   17.62
   7   1  16   28.36   12.35
   7  -1  16   19.61   13.92
   7   1  17    7.45   10.82
   7  -1  17  -11.43   10.47
   7   2 -19   72.13   16.23
  -7  -2  19   83.83    6.53
   7   2 -18   -4.78    4.25
   7  -2 -18   -1.27    5.37
  -7  -2  18   -5.74    3.41
   7   2 -17   17.58    4.54
  -7   2  17   19.42    4.79
  -7  -2  17   33.35    7.45
   7   2 -16    0.74    4.19
   7  -2 -16    1.93    5.39
  -7  -2  16    1.32    3.60
   7   2 -15   10.04    6.56
   7  -2 -15    1.48    1.17
   7  -2 -15    1.74    1.35
   7  -2 -15    2.75    5.00
  -7  -2  15    2.59    2.88
   7   2 -14   10.02    4.30
   7   2 -14   11.44    4.38
   7  -2 -14    5.71    1.81
  -7  -2  14   10.47    4.79
   7  -2 -14    4.86    4.81
   7  -2 -14    7.01    2.09
   7   2 -13   48.33    8.48
   7   2 -13   41.10   10.62
   7  -2 -13   45.73   15.28
  -7  -2  13   48.72    5.93
   7   2 -12   51.97    7.95
   7   2 -12   52.99   18.40
   7  -2 -12   54.58   20.18
  -7  -2  12   44.23    5.94
   7   2 -11 1132.48   31.58
   7   2 -11 1092.51   31.32
   7  -2 -11 1013.94   29.15
  -7  -2  11 1056.36   28.92
   7   2 -10  244.41   15.15
  -7  -2  10  219.74    9.74
   7  -2 -10  224.15   13.69
  -7  -2  10  157.16    7.79
   7   2  -9 1116.51   36.48
  -7  -2   9 1092.60   33.98
   7  -2  -9 1079.71   42.93
  -7  -2   9  766.98   23.95
   7   2  -8 1890.13   58.83
  -7  -2   8 1958.34   59.65
   7  -2  -8 1850.62   57.57
  -7  -2   8 1407.03   43.05
  -7   2   7    7.18    2.49
   7   2  -7    4.66    6.73
   7  -2  -7    5.18    1.64
  -7  -2   7    7.63    3.14
   7  -2  -7    3.14    5.65
  -7  -2   7    5.72    4.20
   7   2  -6 2550.82   73.69
  -7   2   6 2434.88   64.05
   7  -2  -6 2323.07   61.05
  -7  -2   6 1935.11   51.90
   7  -2  -6 2484.28   69.57
  -7  -2   6 2586.89   71.60
   7   2  -5    5.66    7.32
  -7   2   5    7.80    3.42
   7  -2  -5    2.69    3.35
  -7  -2   5    3.85    4.72
   7  -2  -5    3.66    4.31
  -7  -2   5    7.41    6.65
  -7   2   4  273.41    9.46
   7   2  -4  213.70    9.84
   7   2  -4  309.82   17.44
  -7  -2   4  232.65    8.53
   7  -2  -4  320.10   16.63
   7  -2  -4  267.81   12.18
  -7   2   3 1153.86   31.15
   7   2  -3  908.43   31.01
   7   2  -3 1168.50   34.86
  -7  -2   3  964.37   30.89
   7  -2  -3 1215.72   35.40
   7  -2  -3 1152.85   31.43
  -7   2   2    8.16    4.84
   7   2  -2    5.93    5.87
   7   2  -2   -6.14   10.58
  -7  -2   2   -0.89    4.06
   7  -2  -2    2.10    3.42
   7  -2  -2    0.21    2.88
  -7   2   1 1504.91   40.66
   7   2  -1 1138.13   32.15
   7   2  -1 1513.66   41.92
   7  -2  -1 1523.17   41.48
   7  -2  -1 1550.18   45.26
   7   2   0    3.43    6.71
   7   2   0   -2.37    8.73
   7  -2   0   -0.80    6.05
   7  -2   0   -2.96    7.19
   7   2   1  121.02   23.06
   7   2   1  172.57   11.32
   7  -2   1  147.50    9.31
   7  -2   1  166.10   10.82
   7   2   2  345.49   13.90
   7   2   2  483.08   20.08
   7  -2   2  421.98   16.63
   7  -2   2  461.31   18.59
   7   2   3  -10.30    8.32
   7   2   3    7.11   10.74
   7  -2   3    8.96    7.30
   7  -2   3    2.89    2.63
   7   2   4  707.90   23.92
   7   2   4  865.22   25.57
   7  -2   4  811.17   24.78
   7  -2   4  837.29   24.60
   7   2   5    1.80   10.37
   7   2   5    6.31    6.41
   7  -2   5   -0.05    8.79
   7  -2   5    1.16    3.31
   7   2   6  419.69   17.94
   7   2   6  547.13   27.89
   7  -2   6  529.53   23.54
   7  -2   6  533.61   19.30
   7   2   7   26.67   19.16
   7   2   7   22.80   10.66
   7  -2   7   29.04   11.60
   7  -2   7   37.50    7.41
   7   2   8  181.01   15.68
   7   2   8  178.52    7.23
   7  -2   8  203.35   15.36
   7  -2   8  183.82   20.31
   7   2   9    6.18   10.65
   7   2   9    3.06    3.41
   7  -2   9   22.91   10.90
   7  -2   9    0.16    4.08
   7   2  10   39.81   15.35
   7   2  10   51.78    7.25
   7  -2  10   69.62   14.65
   7  -2  10   57.39   19.47
   7   2  11   -1.17   11.31
   7   2  11    6.80    4.06
   7  -2  11   14.10   12.20
   7  -2  11    4.37    4.38
   7   2  12   22.61   16.41
   7  -2  12   26.88   11.79
   7   2  13   22.65   17.57
   7  -2  13   20.40   19.93
   7   2  14    9.14   12.22
   7  -2  14   12.16   12.31
   7   2  15   80.82   16.95
   7  -2  15   34.43   13.22
   7   2  16    1.70   10.99
   7  -2  16   13.86   13.11
   7   2  17   58.32   15.82
   7  -2  17   14.98    7.47
   7   3 -19   24.20   10.12
  -7  -3  19   26.76   10.60
   7   3 -18  135.52    7.45
   7  -3 -18  137.55    8.21
  -7  -3  18  131.19    7.56
   7   3 -17   49.71    8.68
   7  -3 -17   46.59   14.84
  -7  -3  17   45.48   11.55
   7   3 -16    4.52    5.98
   7  -3 -16    5.25    3.35
   7  -3 -16   10.33    4.91
  -7  -3  16    5.59    3.74
   7   3 -15    7.24    4.97
   7  -3 -15    2.10    1.70
   7  -3 -15   -3.09    6.92
  -7  -3  15    5.47    4.71
   7   3 -14    5.60    7.20
   7  -3 -14    2.13    1.20
   7  -3 -14    2.47    1.16
   7  -3 -14    4.55    7.79
  -7  -3  14    4.07    1.88
   7   3 -13   31.33    8.77
   7   3 -13   28.69   16.06
  -7  -3  13   42.59    9.67
   7  -3 -13   35.81    4.11
   7  -3 -13   53.49   12.35
   7  -3 -13   38.09    4.25
   7   3 -12    7.29    3.95
   7   3 -12    7.43    8.05
  -7  -3  12    2.42    5.67
   7  -3 -12    6.83    2.19
   7  -3 -12   -3.22    7.51
   7  -3 -12    4.77    1.88
   7   3 -11  571.37   19.23
   7   3 -11  560.47   21.67
  -7  -3  11  551.14   19.01
   7  -3 -11  544.60   17.31
   7  -3 -11  515.17   20.02
   7  -3 -11  492.67   15.70
   7   3 -10   99.34   11.58
   7  -3 -10  106.67    3.11
   7  -3 -10   88.21    5.51
  -7  -3  10   65.82   10.28
   7  -3 -10  123.15   11.40
  -7  -3  10  117.74   12.90
   7   3  -9  359.43   17.95
   7  -3  -9  332.56   14.01
   7  -3  -9  256.56   10.30
  -7  -3   9  217.41    9.83
   7  -3  -9  346.85   20.34
  -7  -3   9  362.65   15.48
   7   3  -8  366.73   14.63
   7  -3  -8  371.24   12.76
   7  -3  -8  250.68    8.60
  -7  -3   8  256.53   10.49
   7  -3  -8  384.00   16.43
  -7  -3   8  370.74   13.35
   7   3  -7  467.57   20.56
  -7   3   7  461.60   15.19
   7  -3  -7  425.13   14.19
  -7  -3   7  314.40   11.71
   7  -3  -7  451.49   20.92
  -7  -3   7  444.00   15.77
   7   3  -6  909.28   30.44
  -7   3   6  878.74   27.07
   7  -3  -6  876.48   28.84
  -7  -3   6  626.77   23.88
   7  -3  -6  839.26   27.86
  -7  -3   6  910.69   28.96
   7   3  -5  646.63   25.20
  -7   3   5  616.18   20.43
   7  -3  -5  630.11   21.28
  -7  -3   5  442.57   15.84
   7  -3  -5  631.84   13.41
  -7  -3   5  697.99    9.26
  -7   3   4  491.62   16.56
   7   3  -4  487.72   18.97
   7  -3  -4  486.89   19.29
   7  -3  -4  521.32   31.04
  -7  -3   4  382.56   15.11
  -7   3   3  413.47   15.69
   7   3  -3  260.71   12.34
   7   3  -3  444.74   17.71
   7  -3  -3  409.38   14.72
   7  -3  -3  434.38   23.97
[truncated: 1,489,121 more chars]
